# Supplementary material for: Bayesian Probabilistic Projection of International Migration
Source: PubMed Central journal article supplement (PMC4605963; doi:10.1007/s13524-015-0415-0), 2015-09-10

**Burundi Net Migrants (thousands)**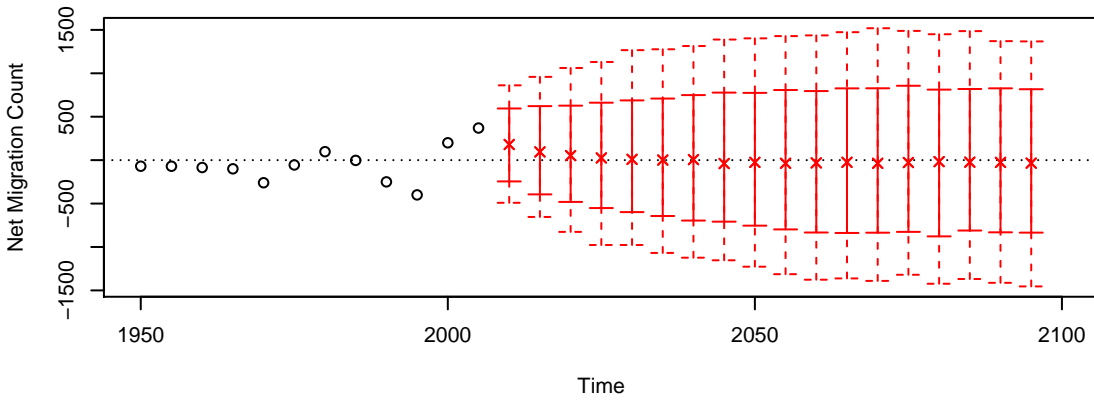**Comoros Net Migrants (thousands)**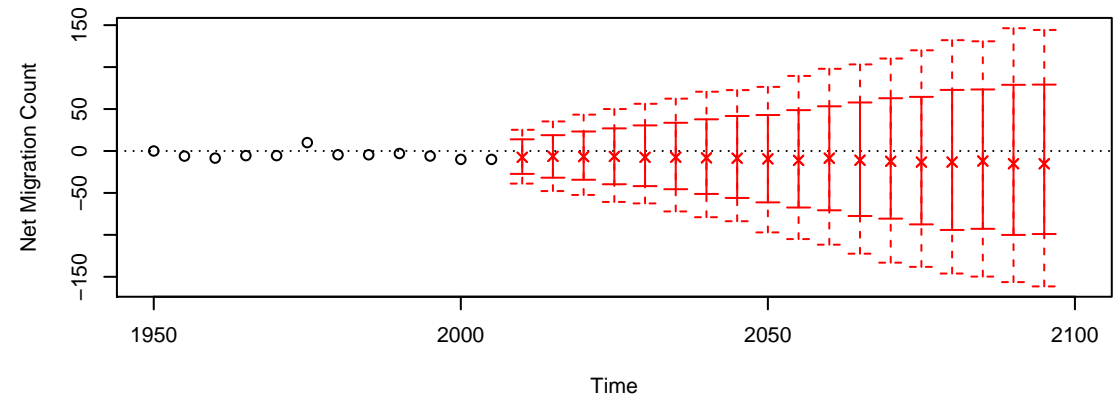**Djibouti Net Migrants (thousands)**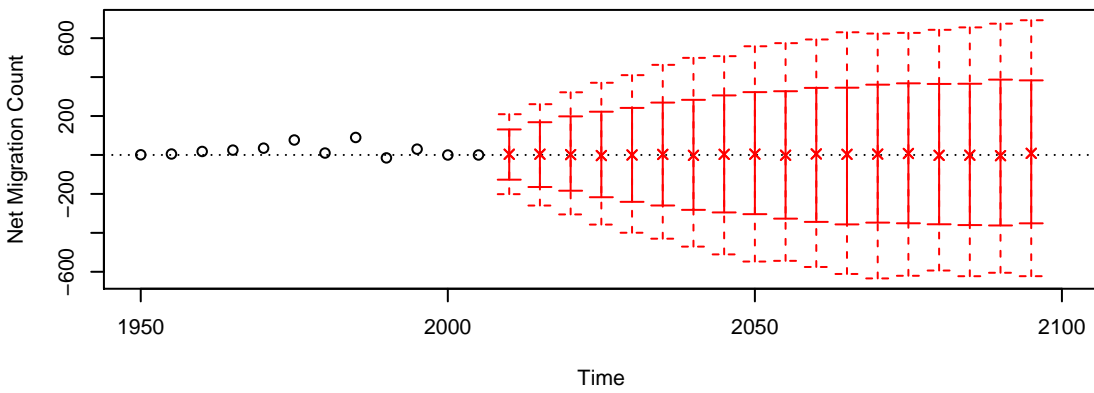**Eritrea Net Migrants (thousands)**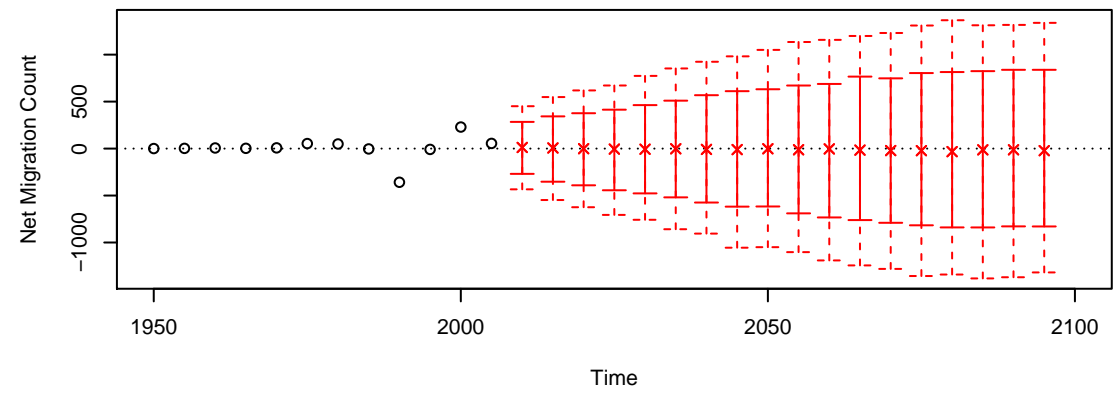**Ethiopia Net Migrants (thousands)**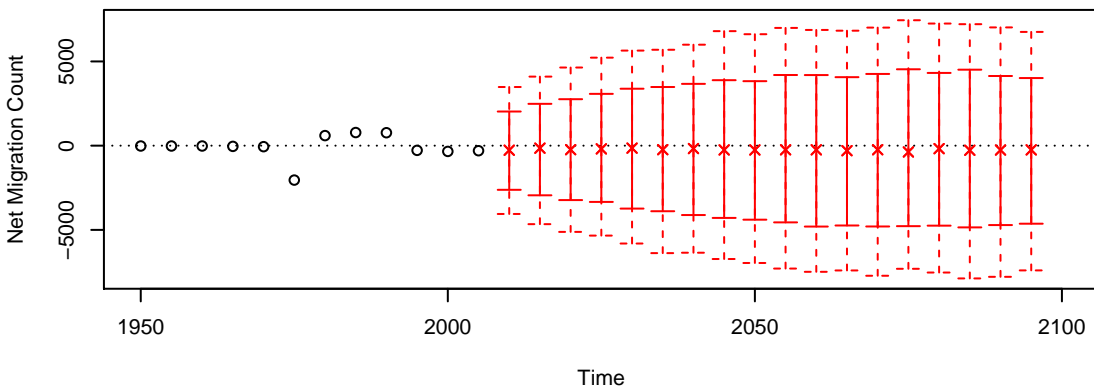**Kenya Net Migrants (thousands)**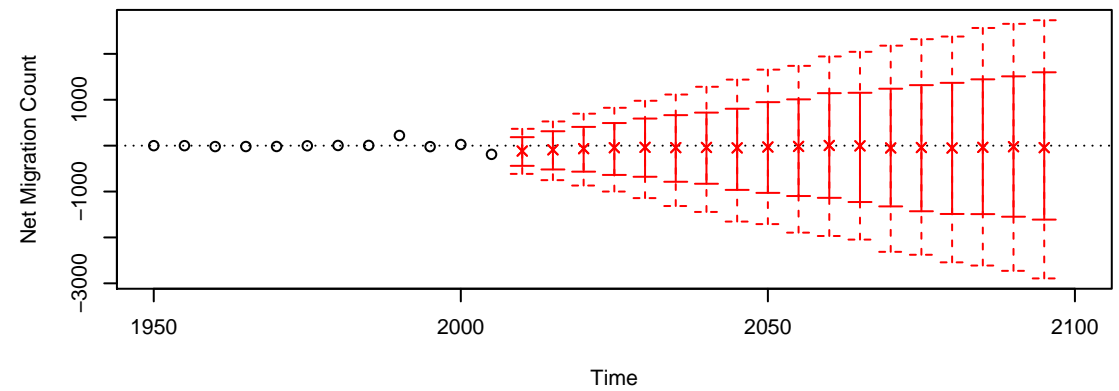

**Madagascar Net Migrants (thousands)**

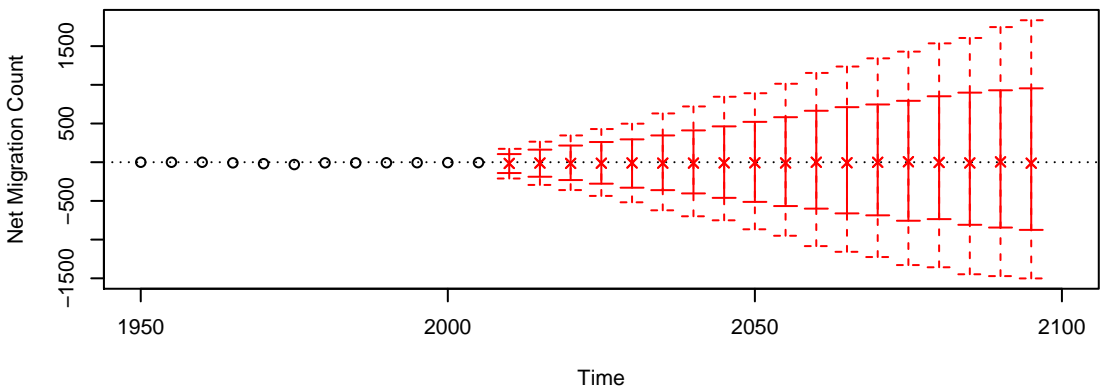

**Malawi Net Migrants (thousands)**

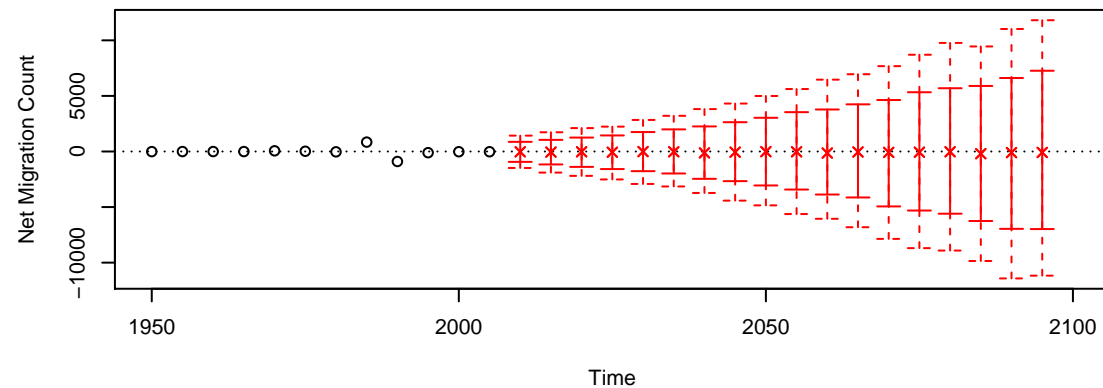

**Mauritius Net Migrants (thousands)**

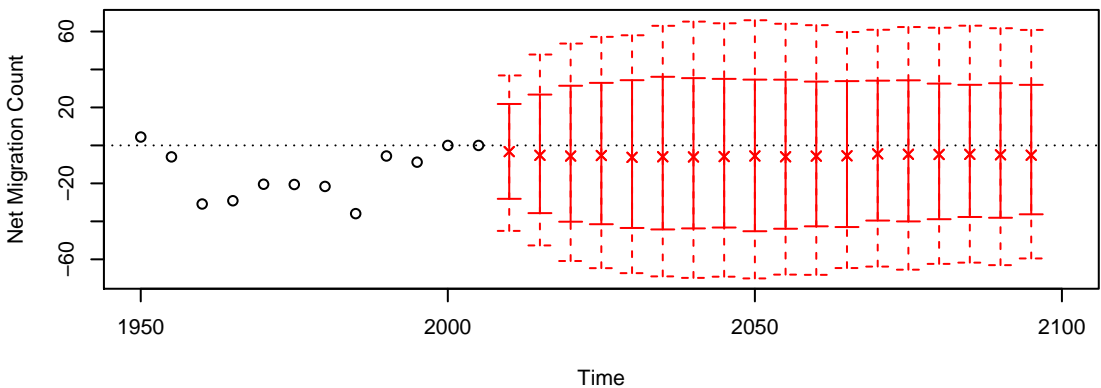

**Mayotte Net Migrants (thousands)**

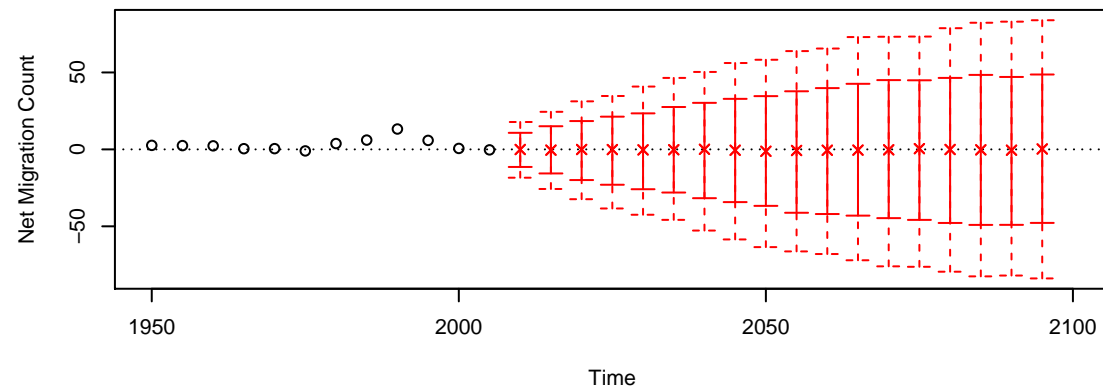

**Mozambique Net Migrants (thousands)**

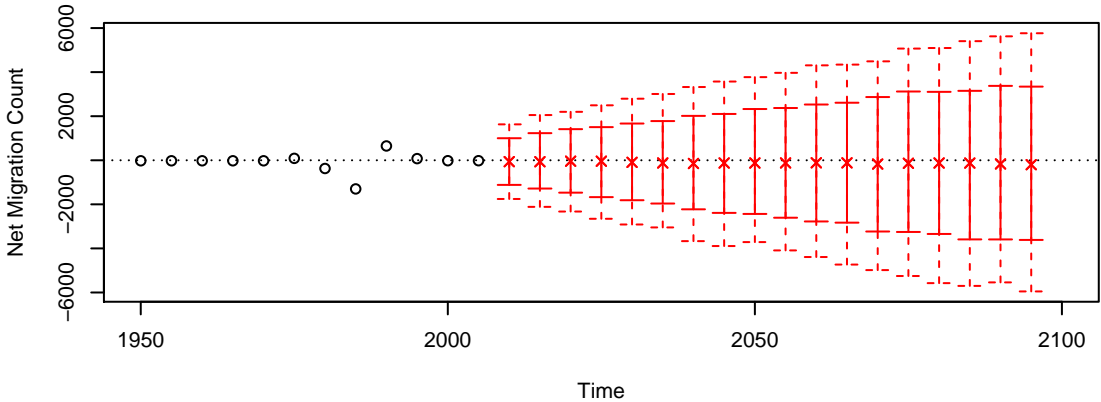

**Réunion Net Migrants (thousands)**

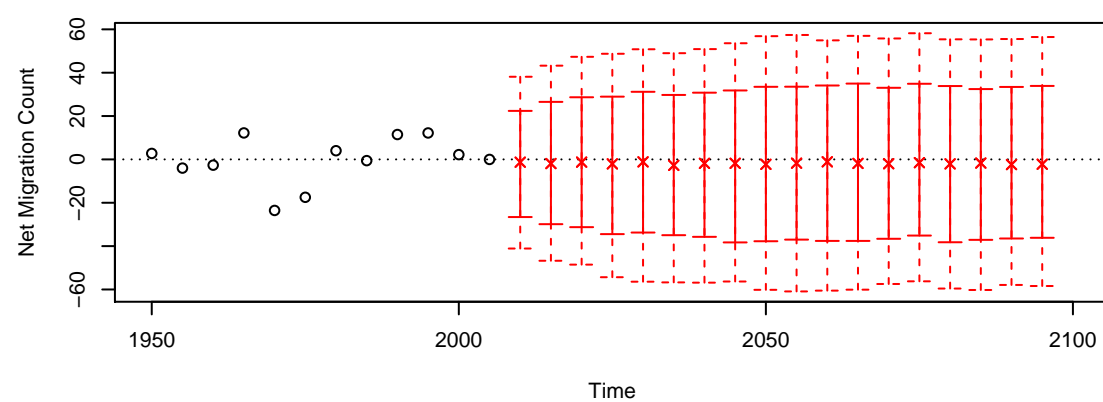

**Rwanda Net Migrants (thousands)**

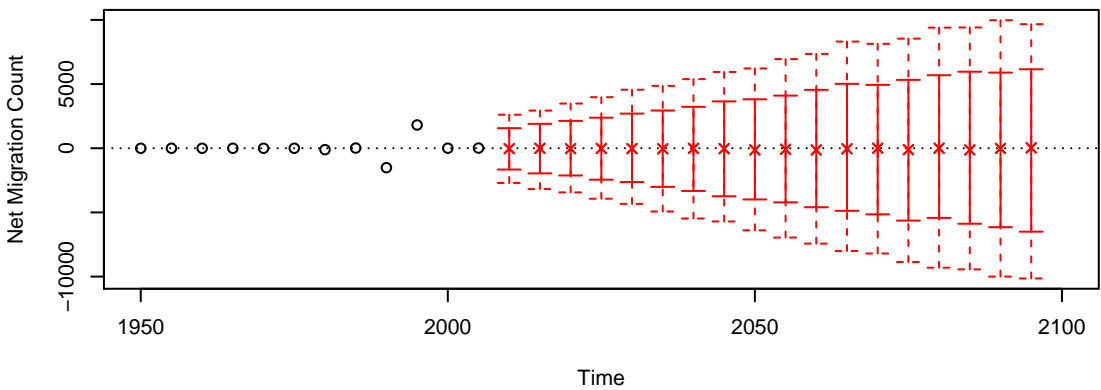

**Somalia Net Migrants (thousands)**

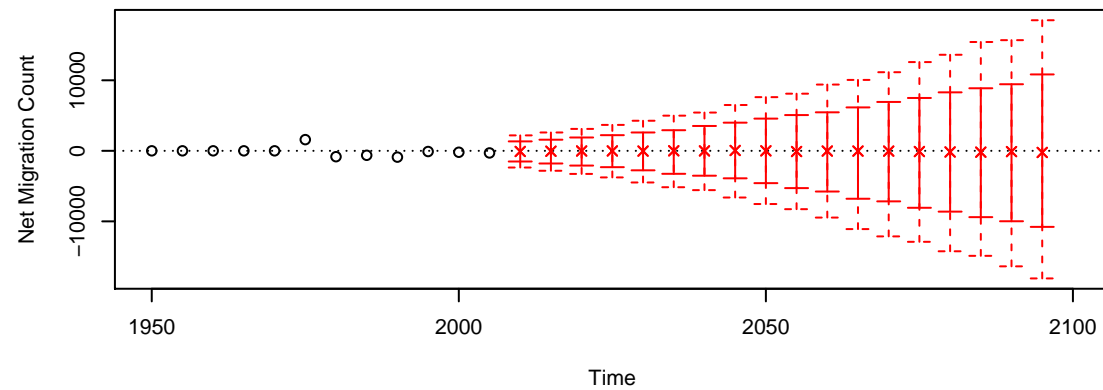

**Uganda Net Migrants (thousands)**

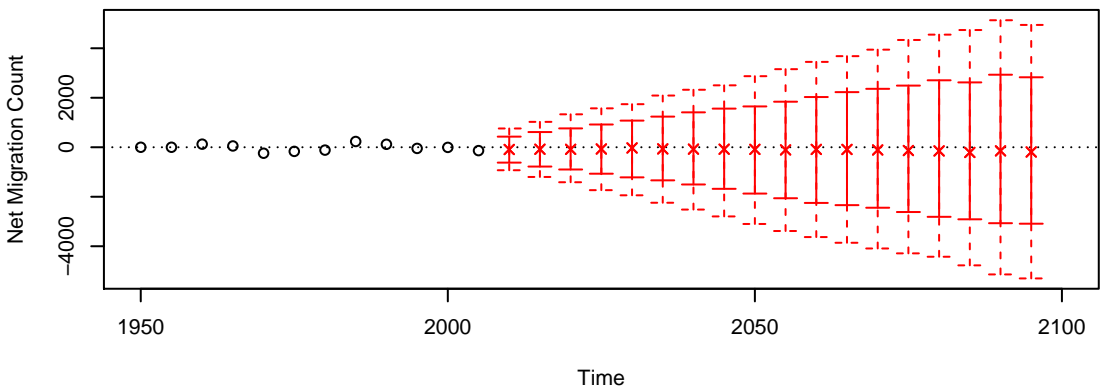

**United Republic of Tanzania Net Migrants (thousands)**

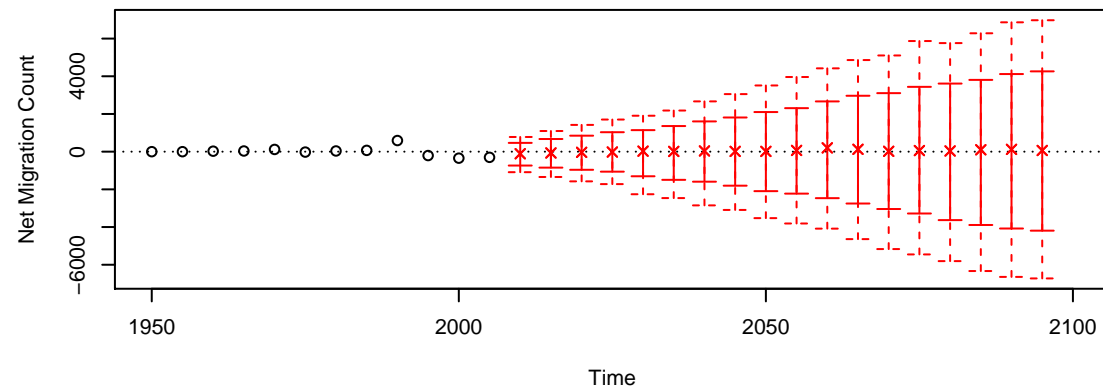

**Zambia Net Migrants (thousands)**

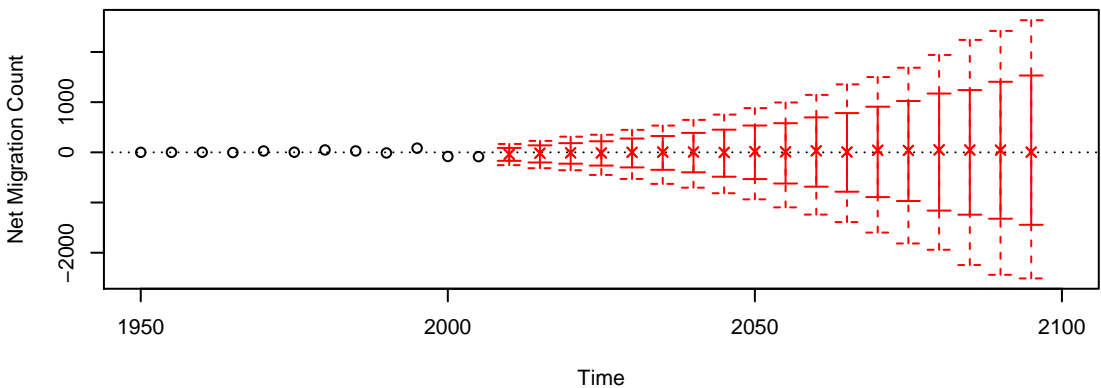

**Zimbabwe Net Migrants (thousands)**

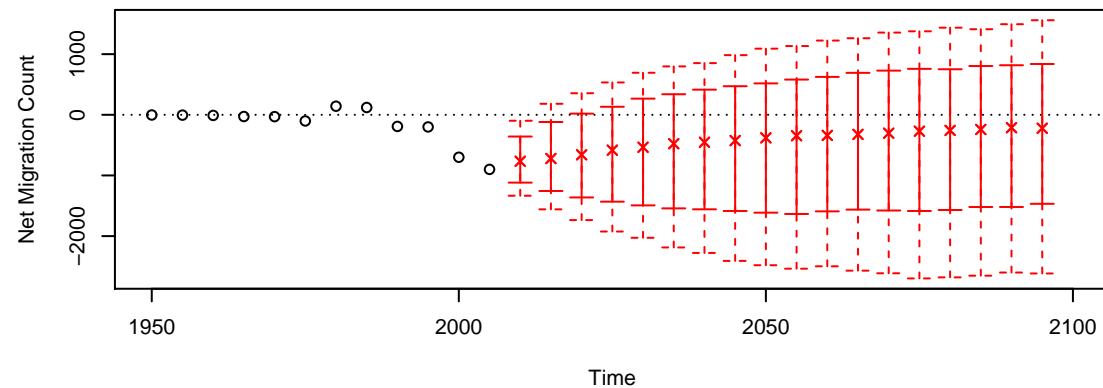

**Angola Net Migrants (thousands)**

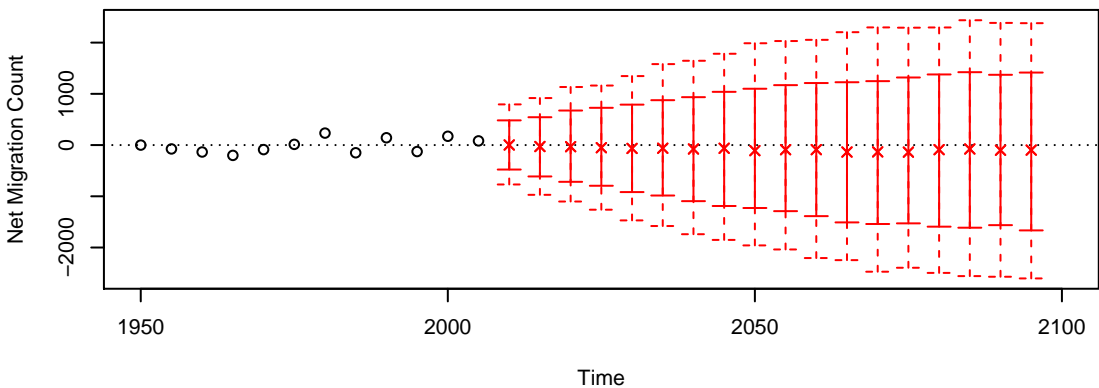

**Cameroon Net Migrants (thousands)**

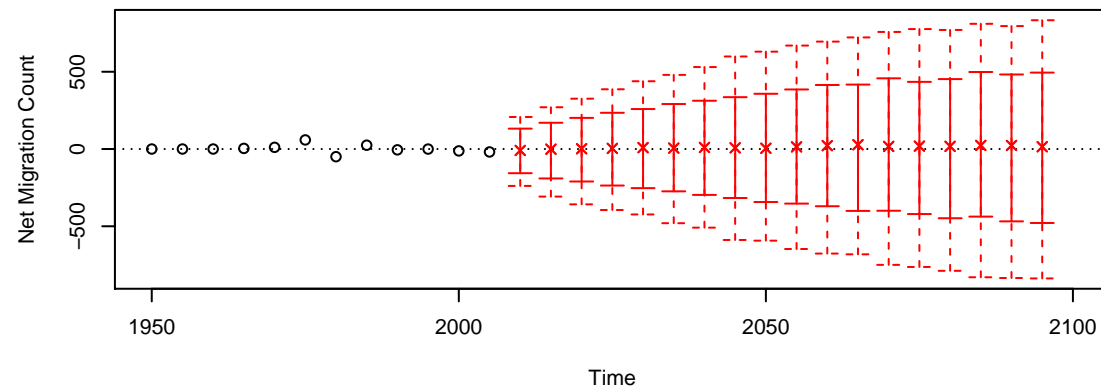

**Central African Republic Net Migrants (thousands)**

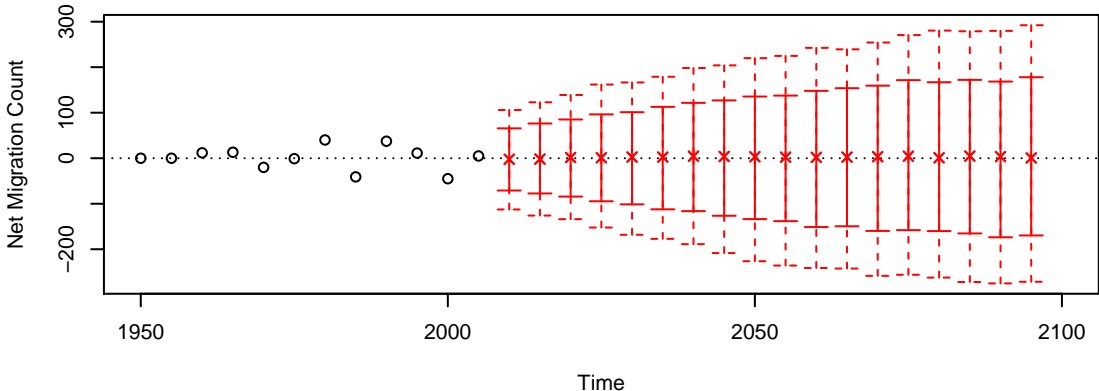

**Chad Net Migrants (thousands)**

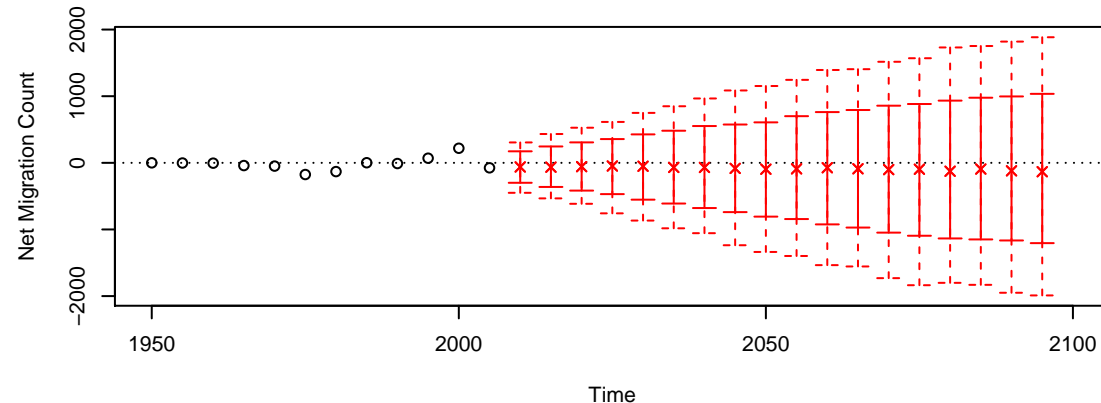

**Congo Net Migrants (thousands)**

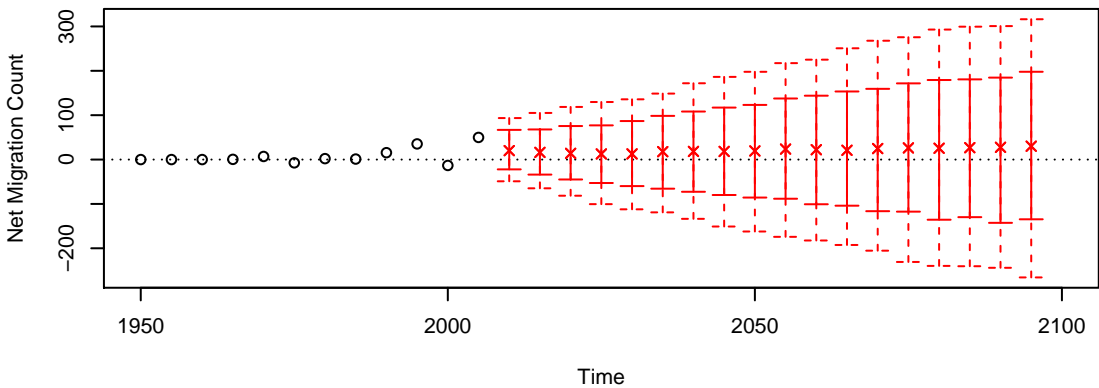

**Democratic Republic of the Congo Net Migrants (thousands)**

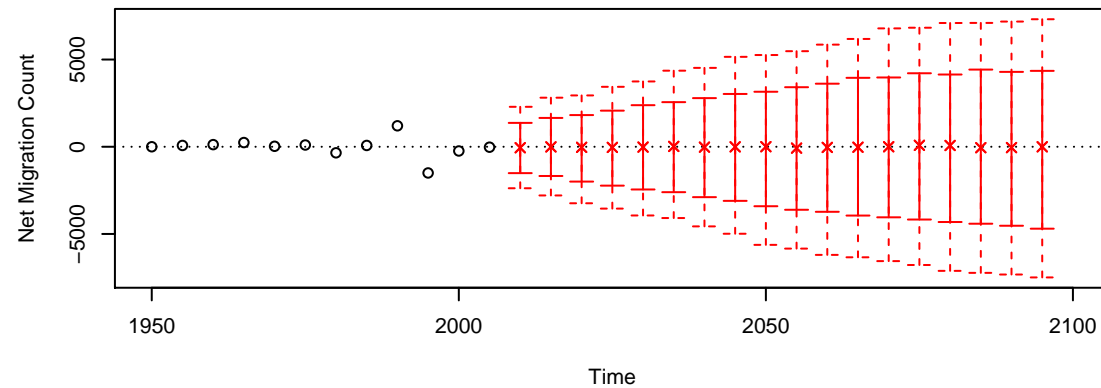

**Equatorial Guinea Net Migrants (thousands)**

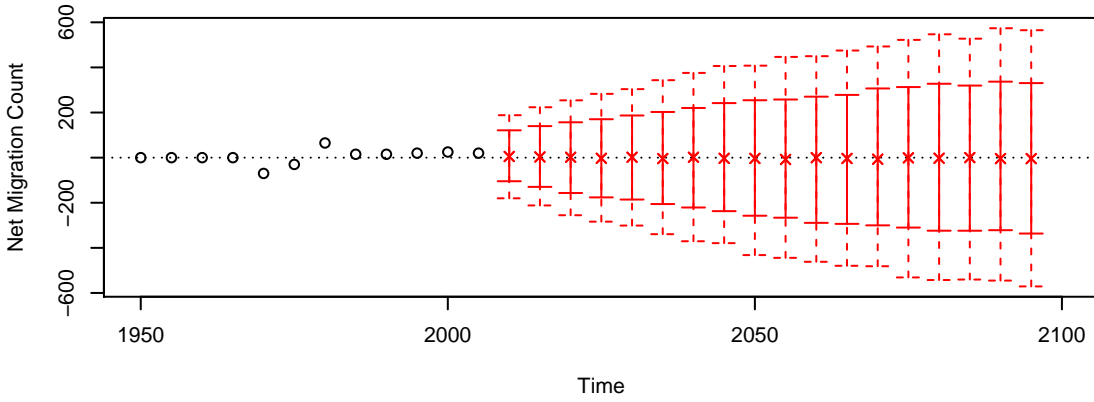

**Gabon Net Migrants (thousands)**

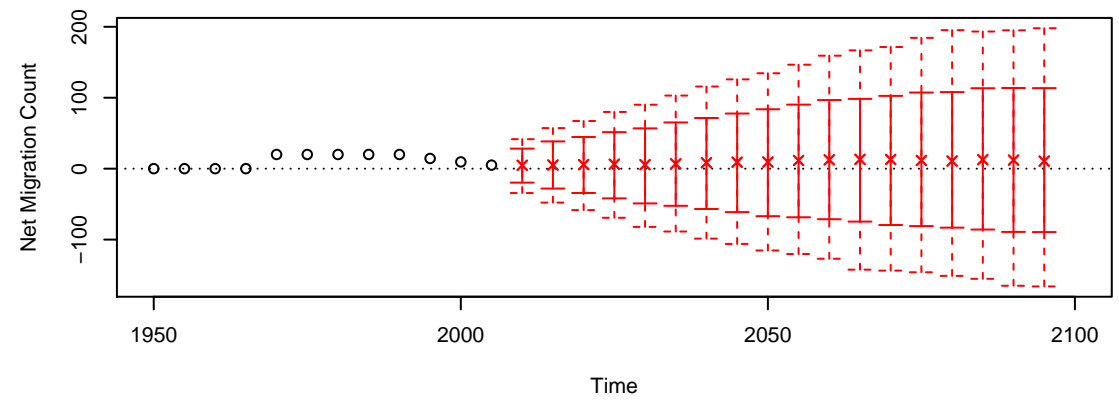

**Sao Tome and Principe Net Migrants (thousands)**

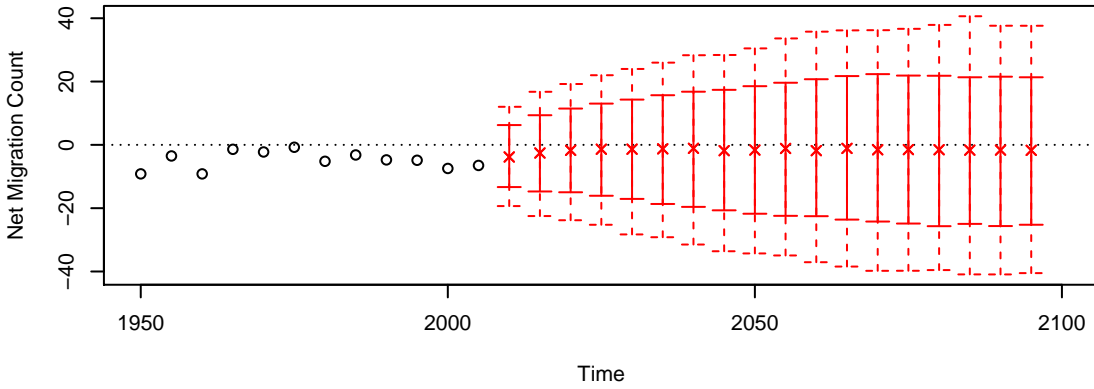

**Algeria Net Migrants (thousands)**

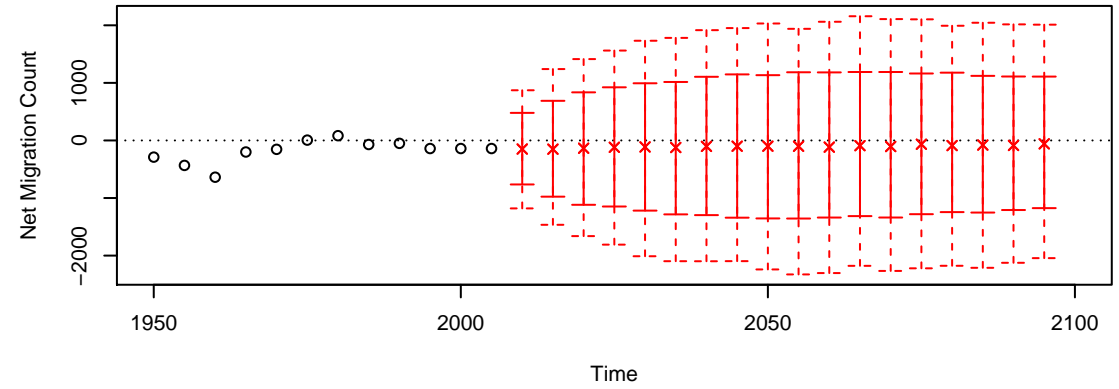

**Egypt Net Migrants (thousands)**

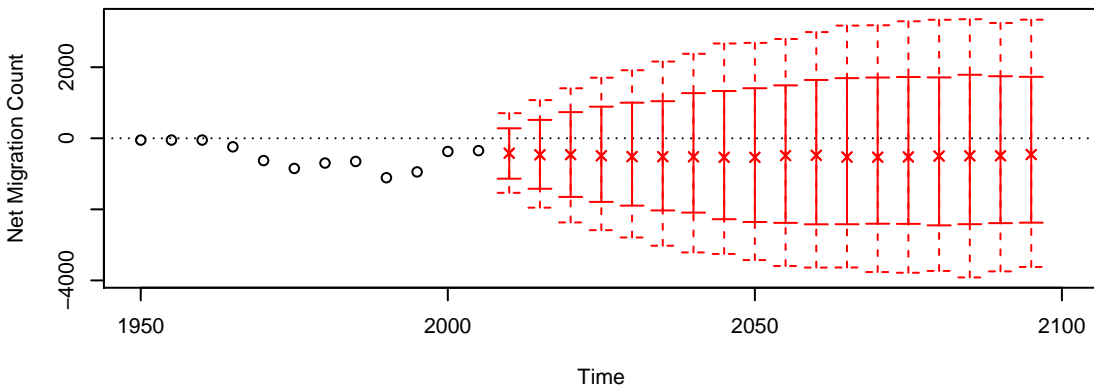

**Libyan Arab Jamahiriya Net Migrants (thousands)**

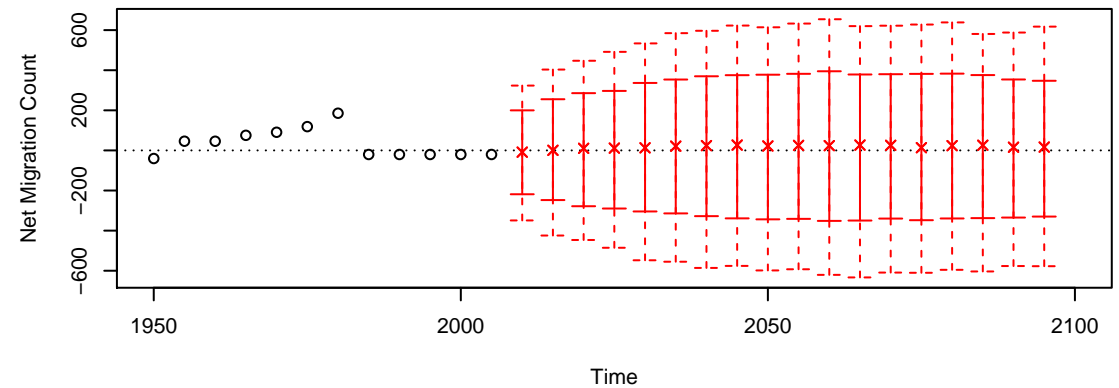

**Morocco Net Migrants (thousands)**

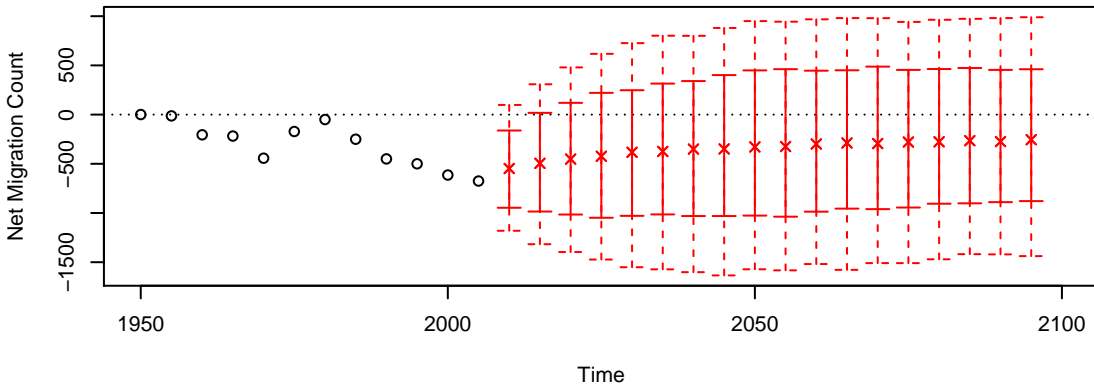

**Sudan Net Migrants (thousands)**

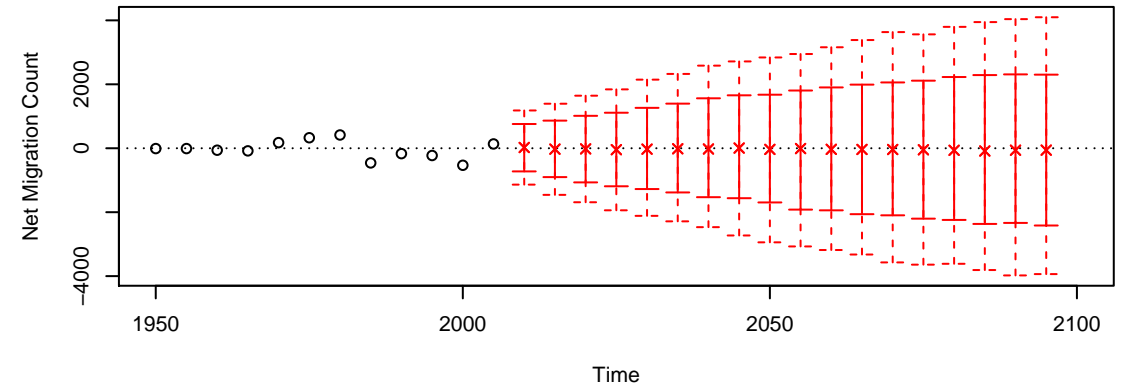

**Tunisia Net Migrants (thousands)**

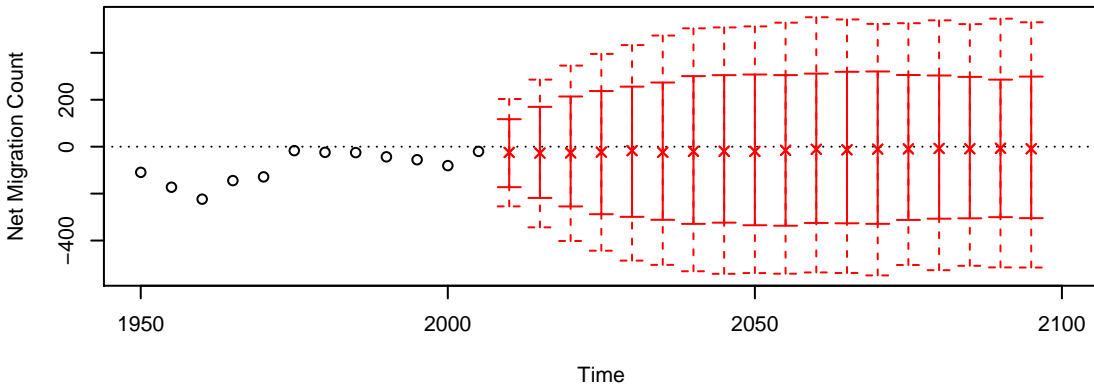

**Western Sahara Net Migrants (thousands)**

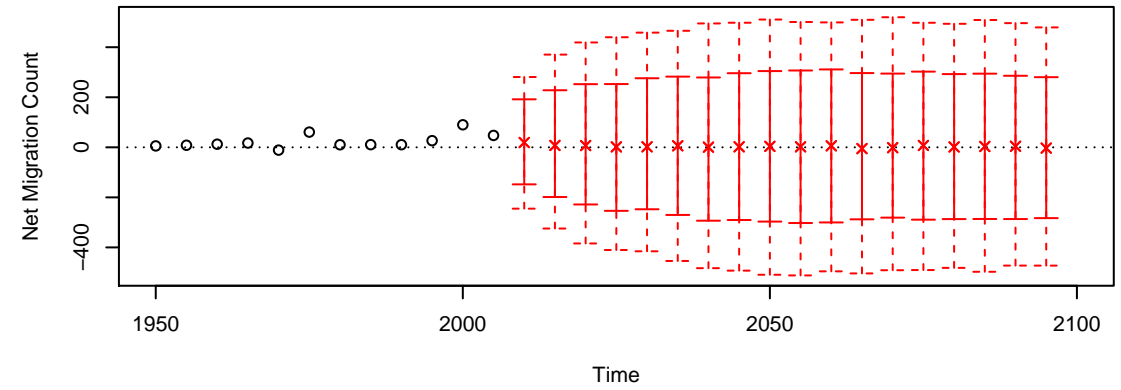

**Botswana Net Migrants (thousands)**

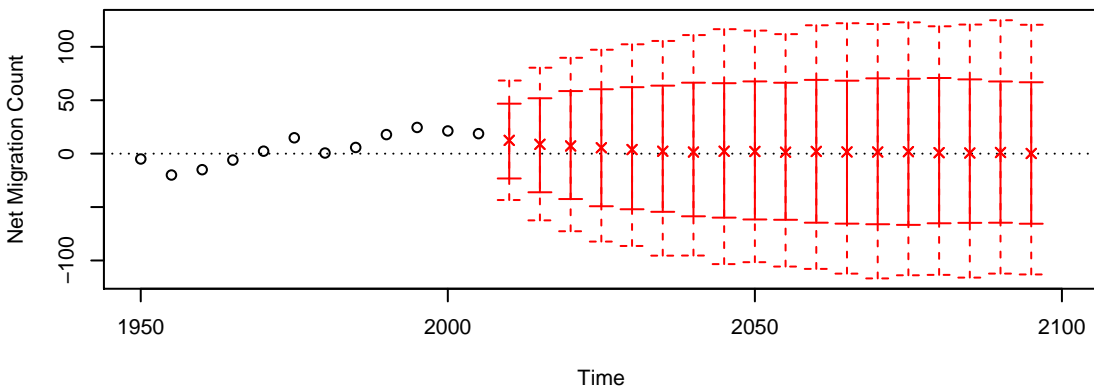

**Lesotho Net Migrants (thousands)**

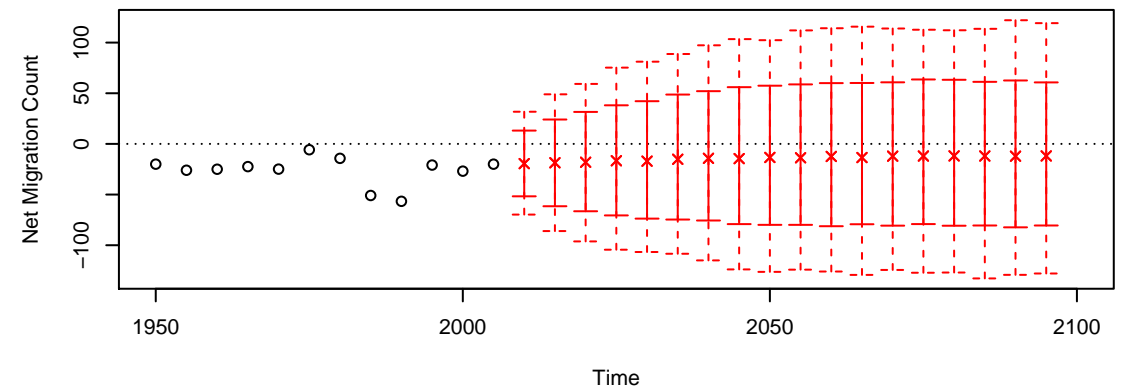

**Namibia Net Migrants (thousands)**

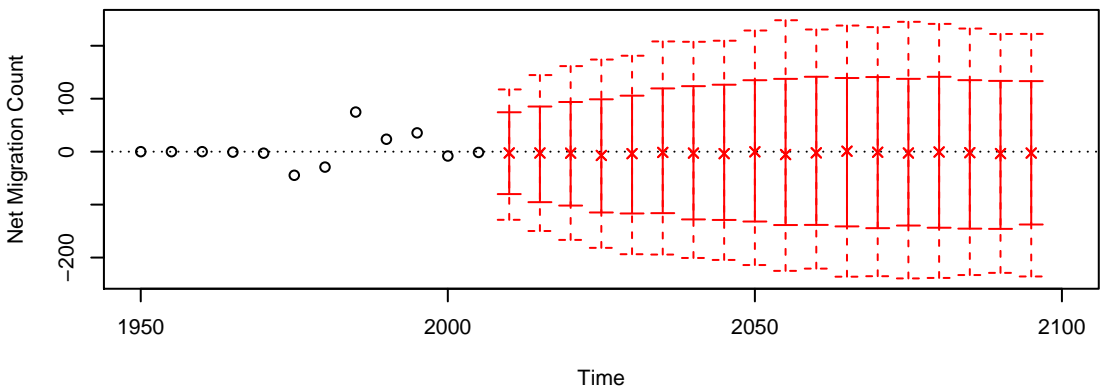

**South Africa Net Migrants (thousands)**

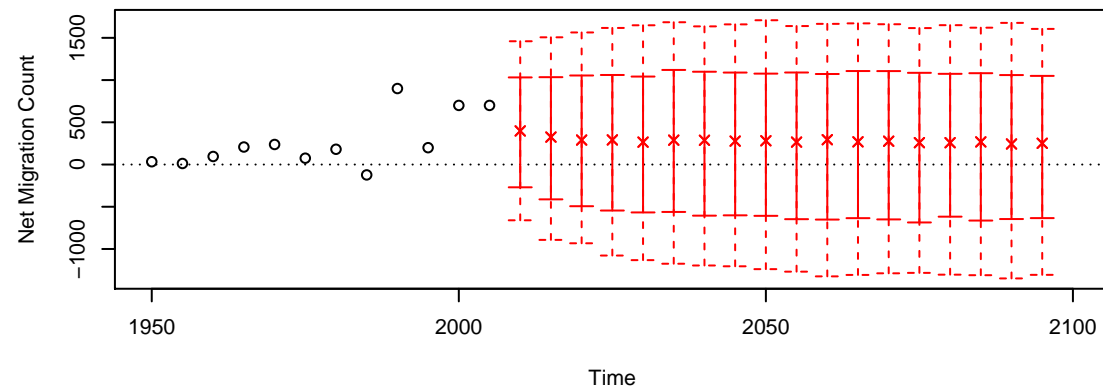

**Swaziland Net Migrants (thousands)**

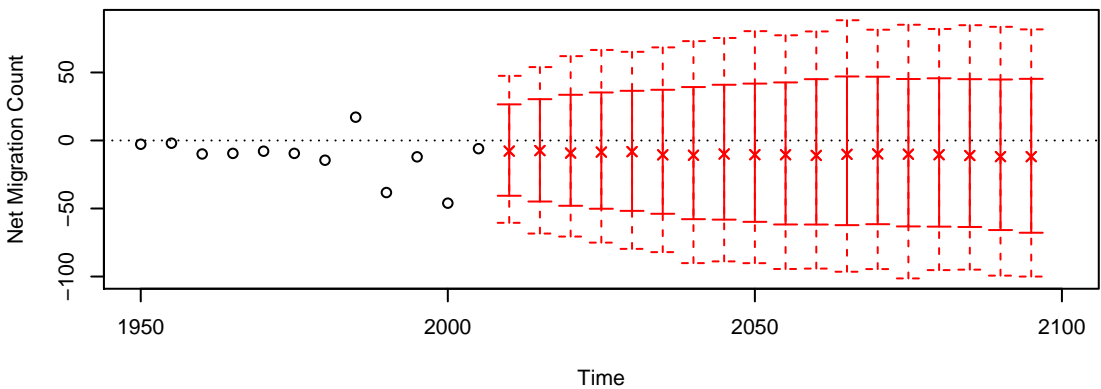

**Benin Net Migrants (thousands)**

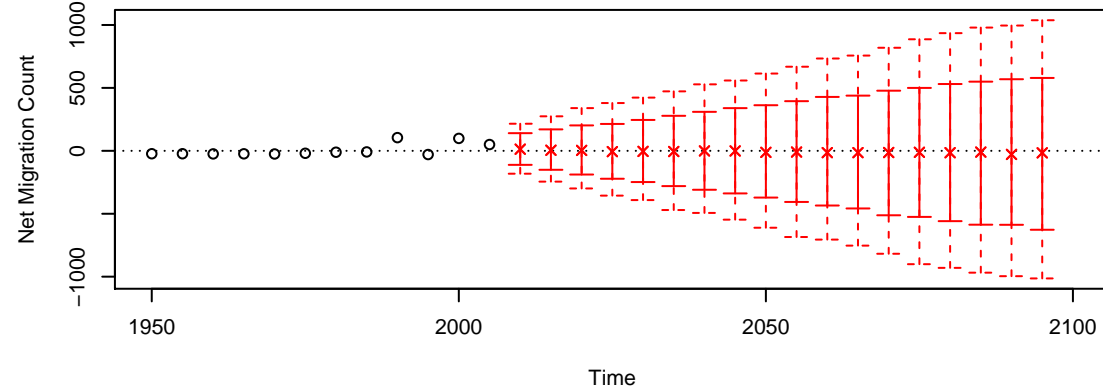

**Burkina Faso Net Migrants (thousands)**

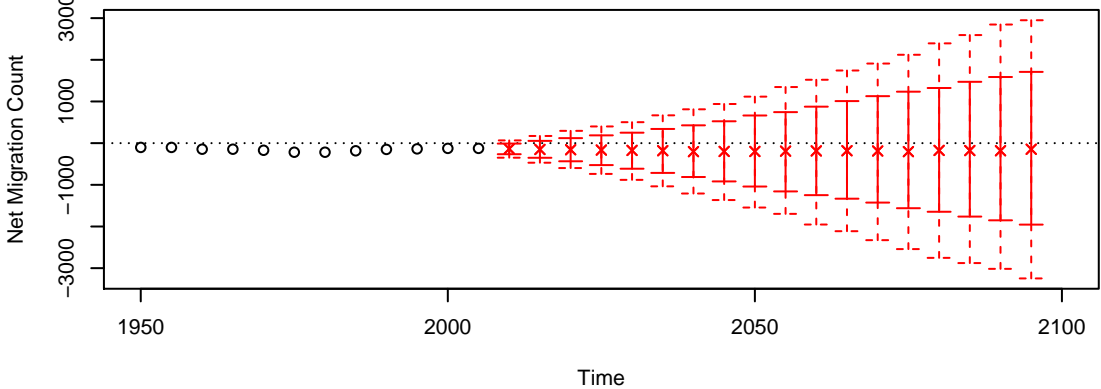

**Cape Verde Net Migrants (thousands)**

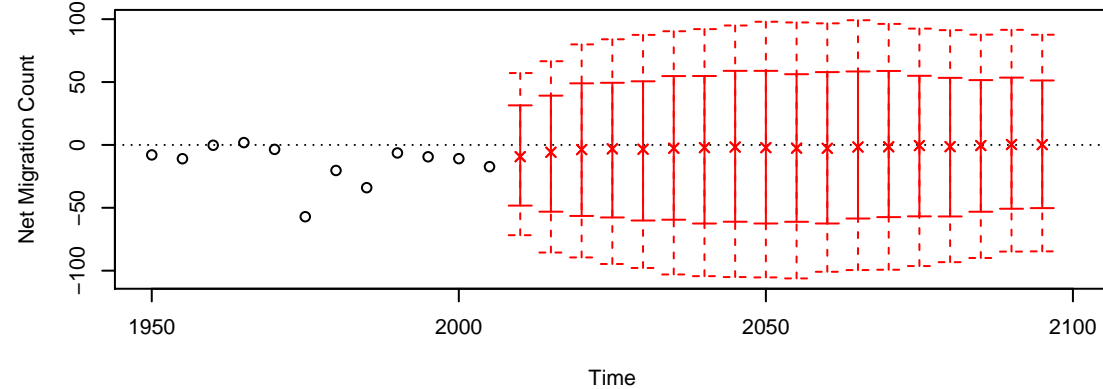

**Côte d'Ivoire Net Migrants (thousands)**

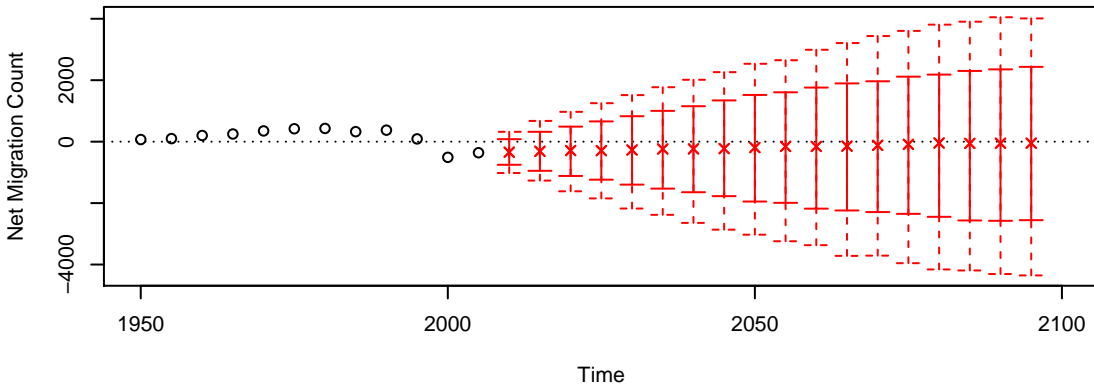

**Gambia Net Migrants (thousands)**

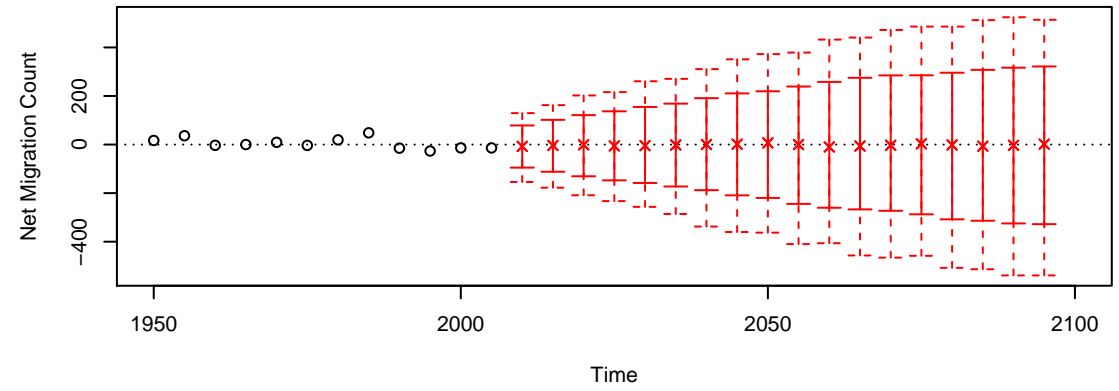

**Ghana Net Migrants (thousands)**

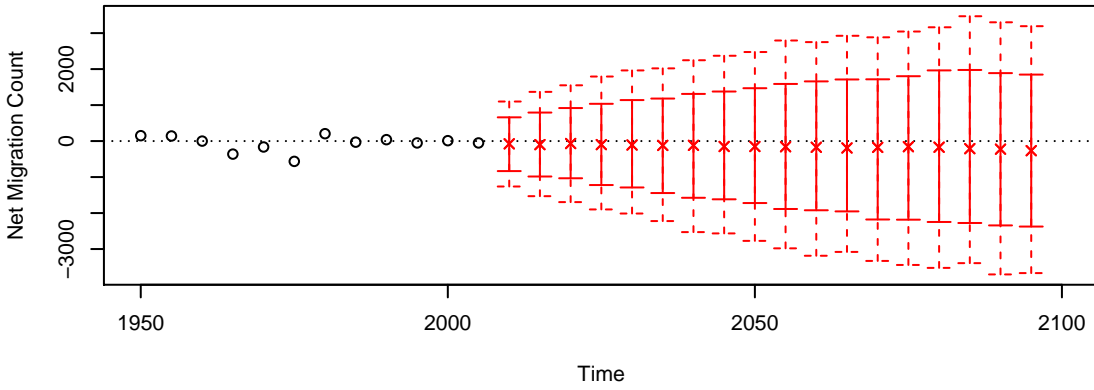

**Guinea Net Migrants (thousands)**

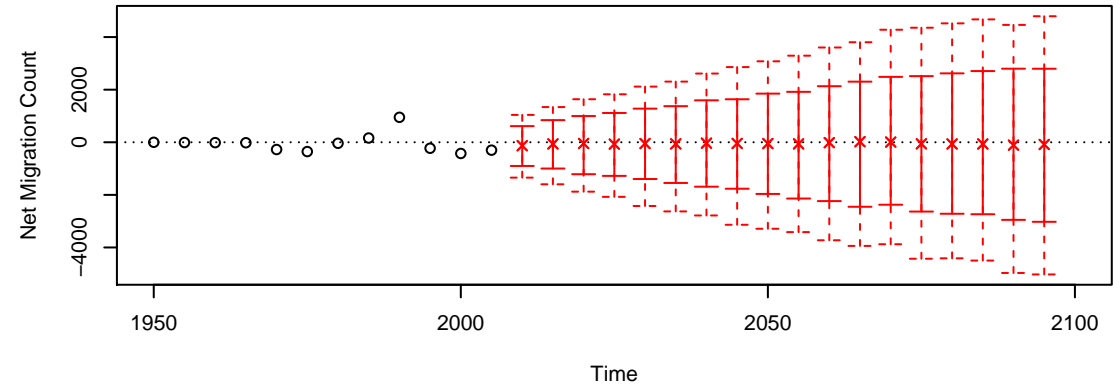

**Guinea-Bissau Net Migrants (thousands)**

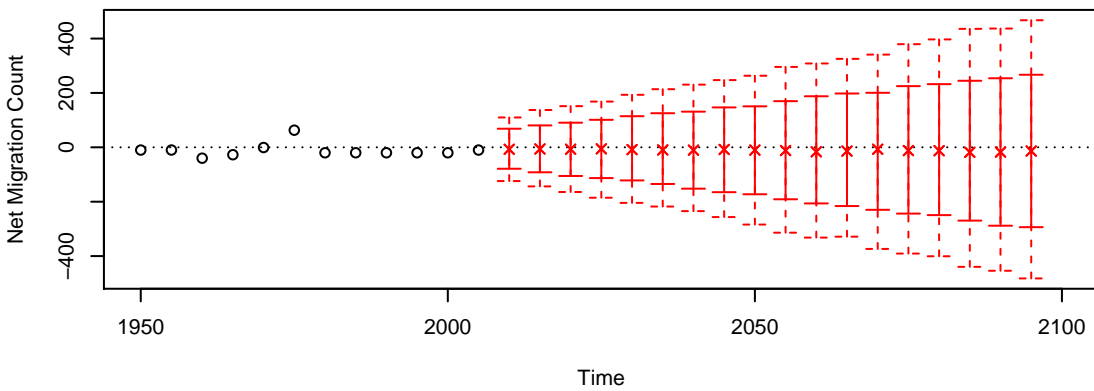

**Liberia Net Migrants (thousands)**

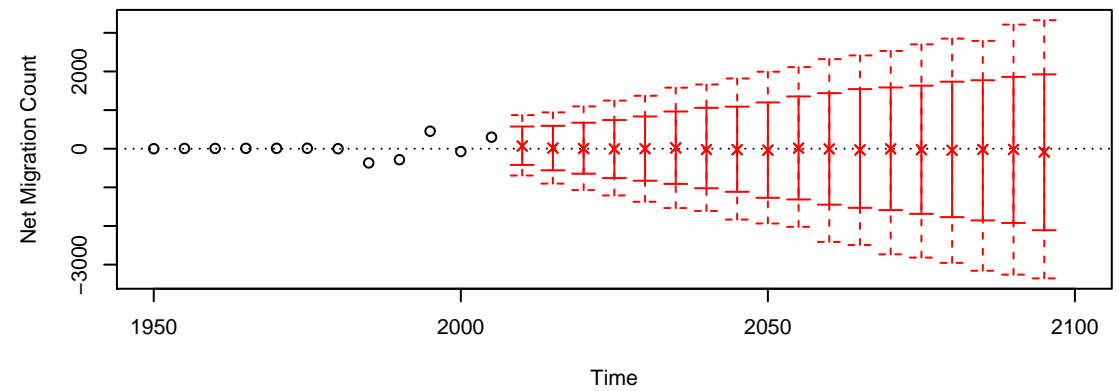



**Mali Net Migrants (thousands)**

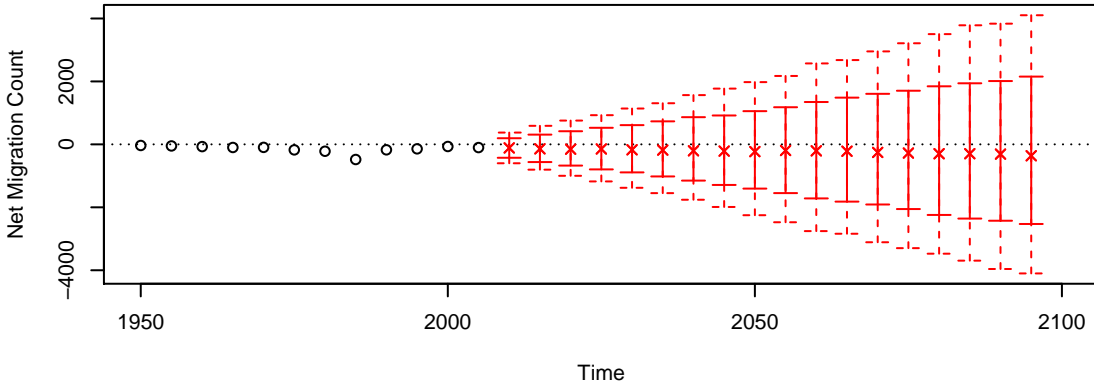

**Mauritania Net Migrants (thousands)**

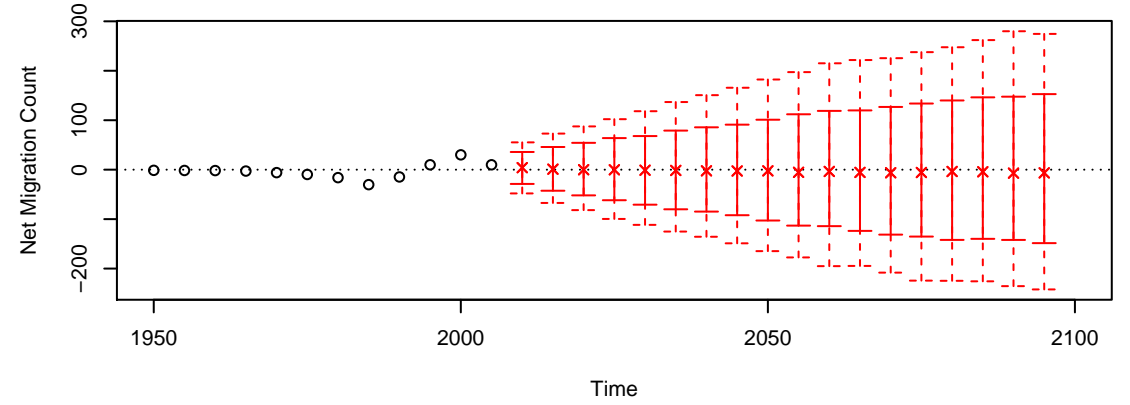

**Niger Net Migrants (thousands)**

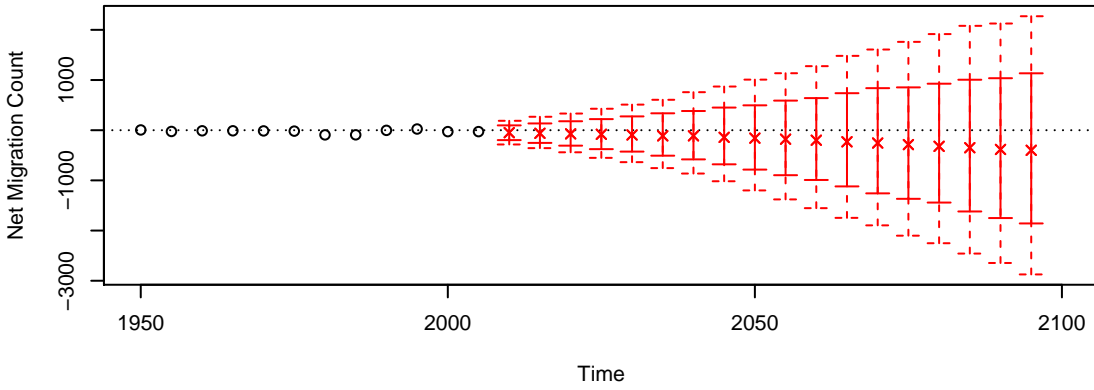

**Nigeria Net Migrants (thousands)**

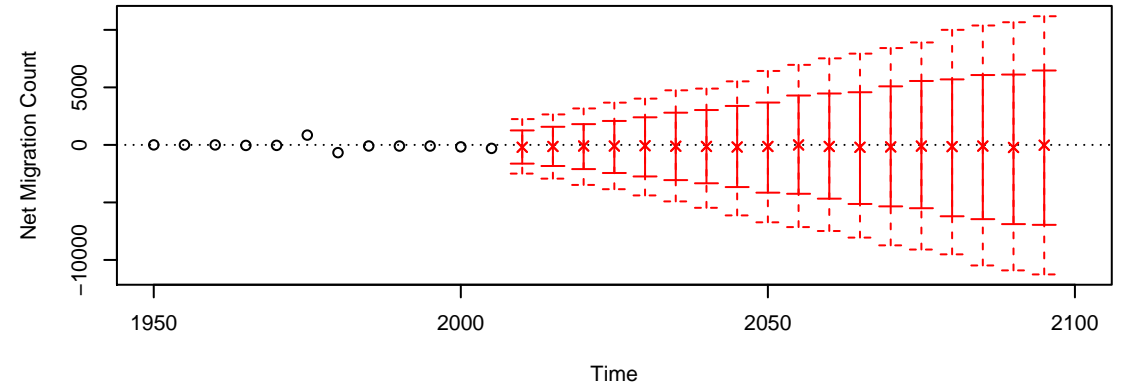

**Senegal Net Migrants (thousands)**

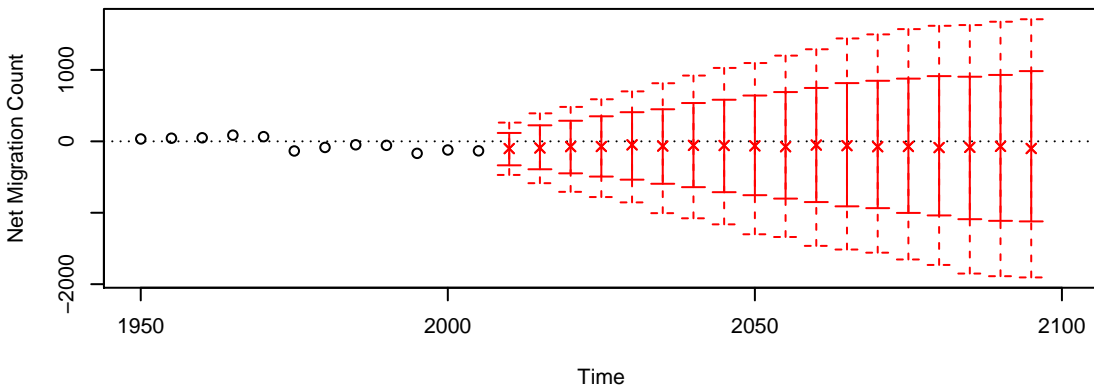

**Sierra Leone Net Migrants (thousands)**

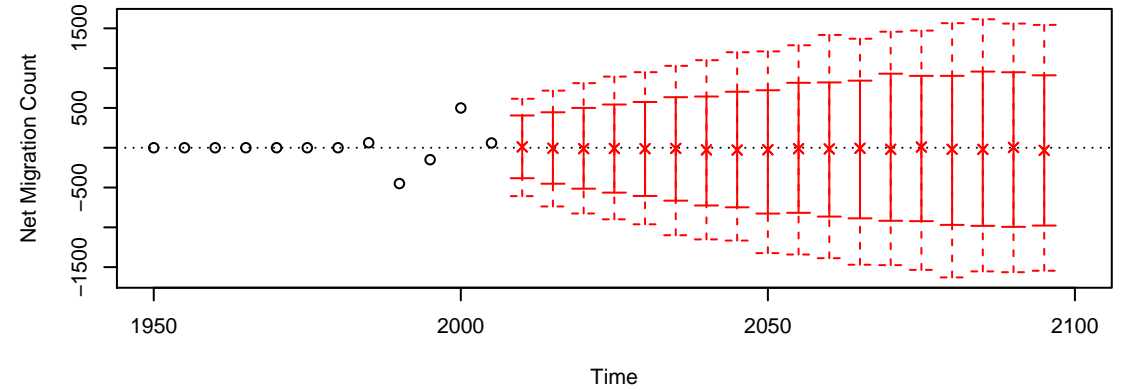

**Togo Net Migrants (thousands)**

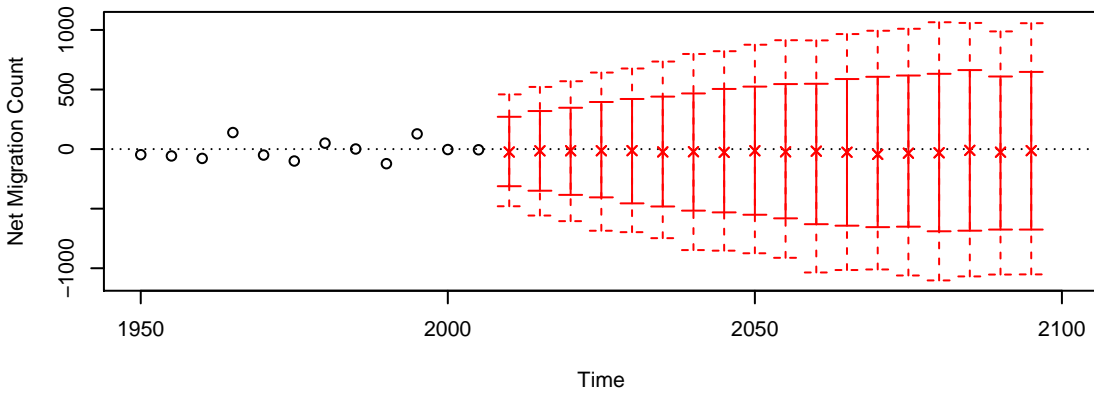

**China Net Migrants (thousands)**

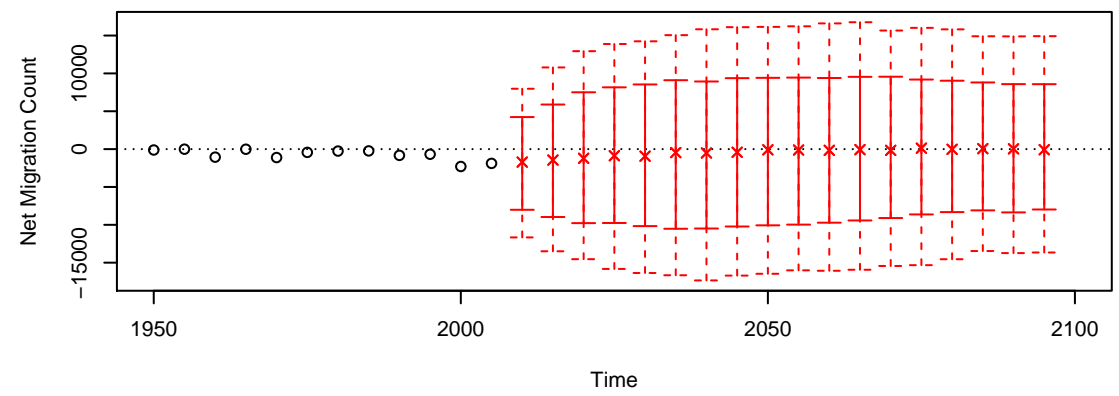

**China, Hong Kong SAR Net Migrants (thousands)**

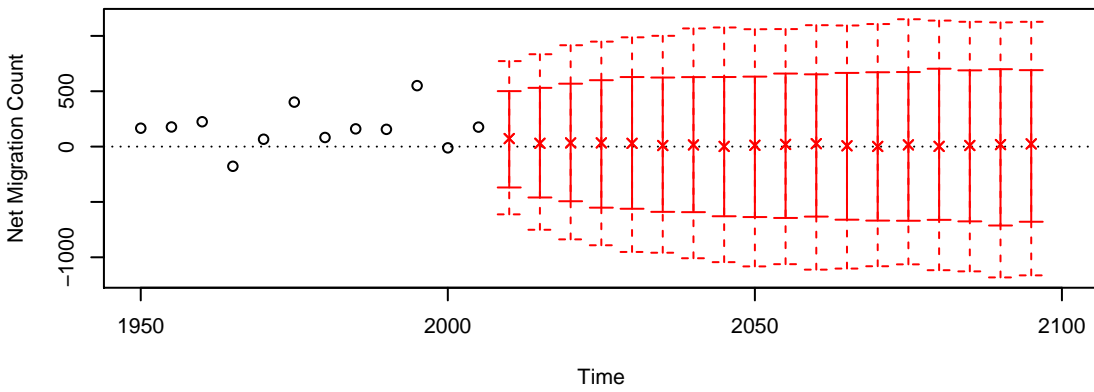

**China, Macao SAR Net Migrants (thousands)**

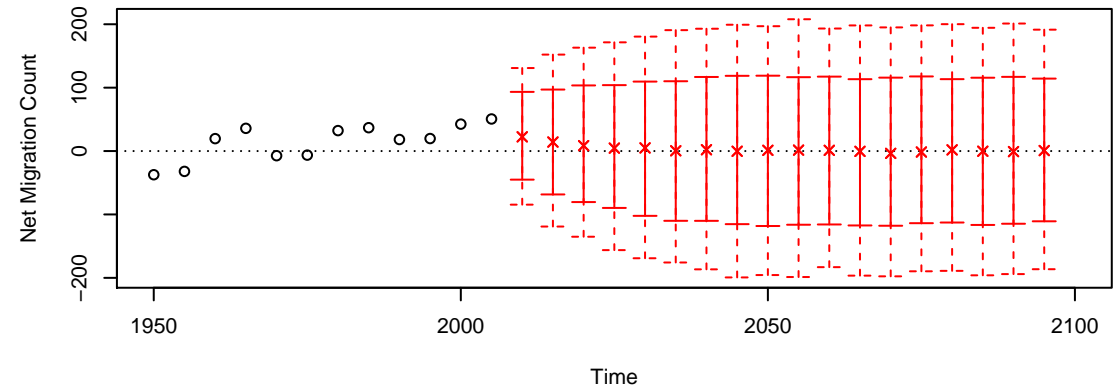

**Dem. People's Republic of Korea Net Migrants (thousands)**

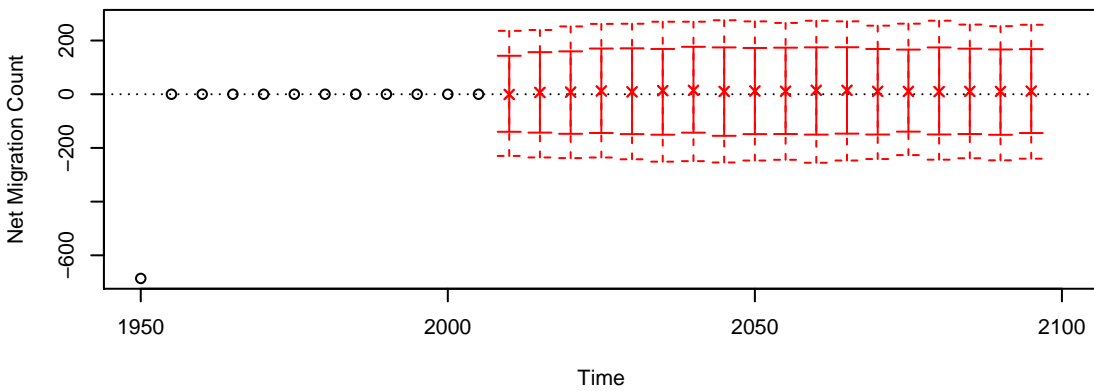

**Japan Net Migrants (thousands)**

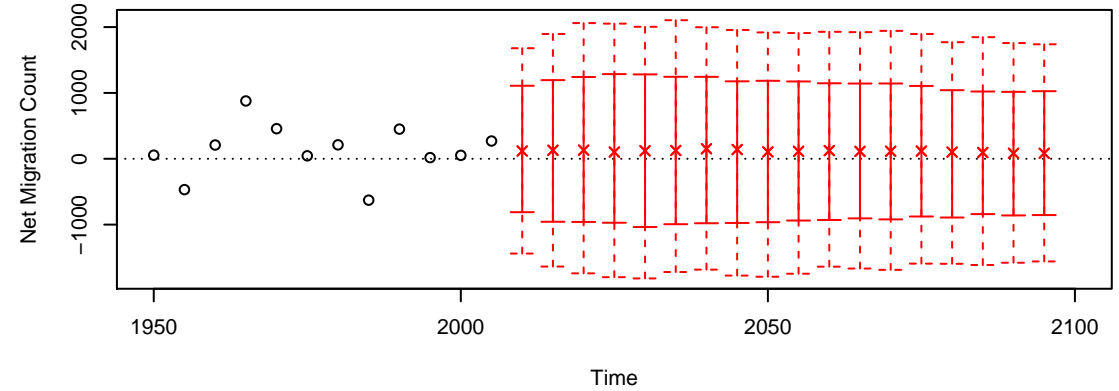

**Mongolia Net Migrants (thousands)**

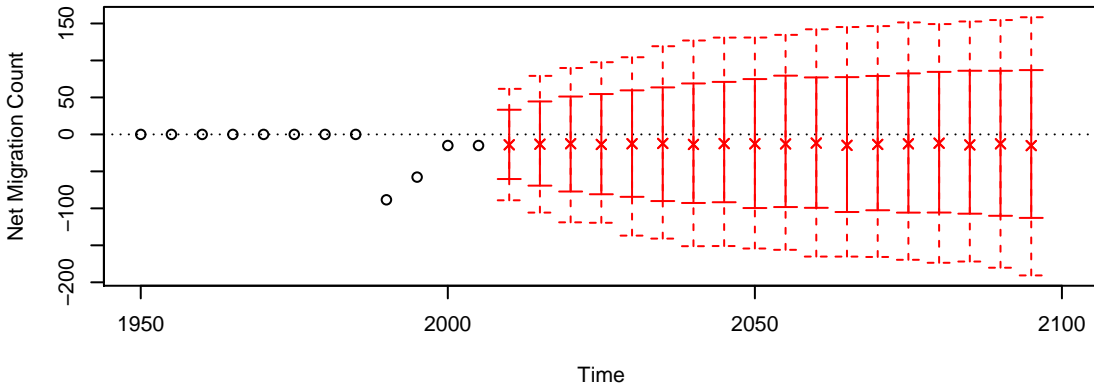

**Republic of Korea Net Migrants (thousands)**

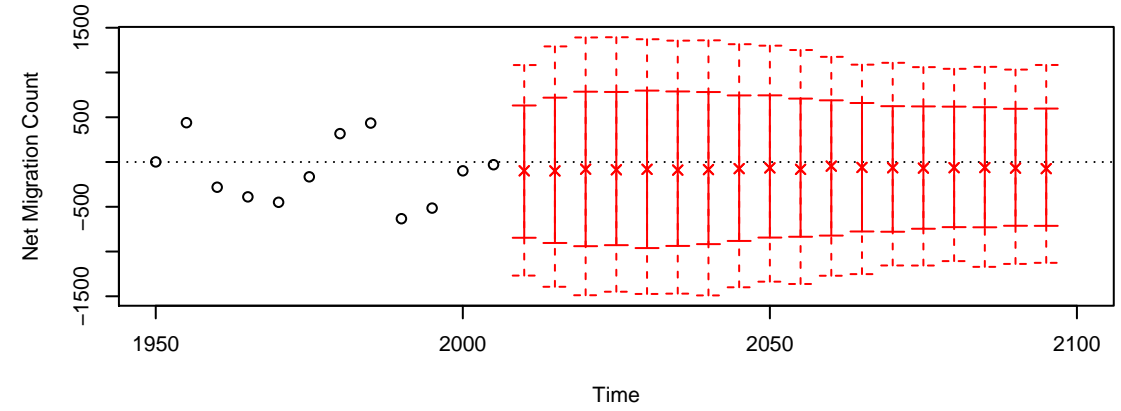

**Other non-specified areas Net Migrants (thousands)**

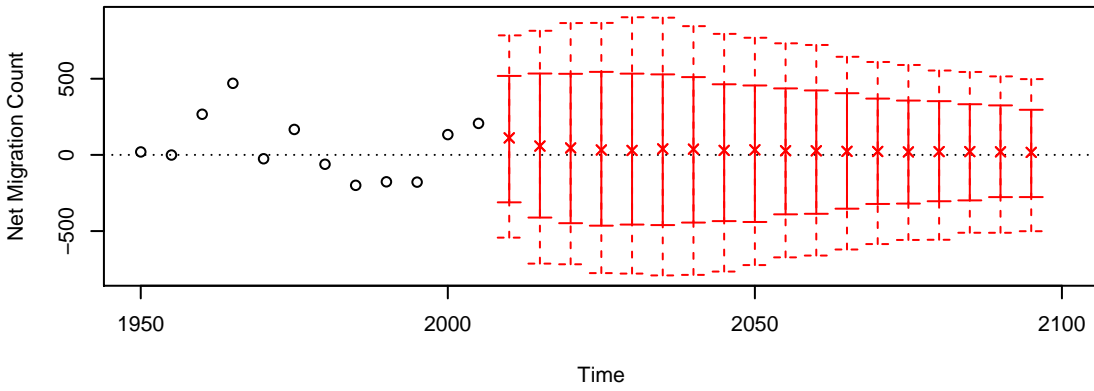

**Kazakhstan Net Migrants (thousands)**

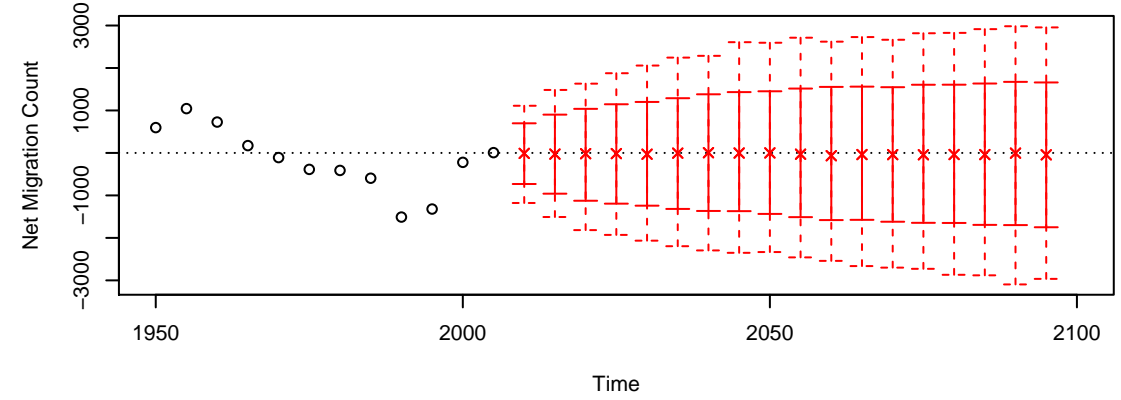

**Kyrgyzstan Net Migrants (thousands)**

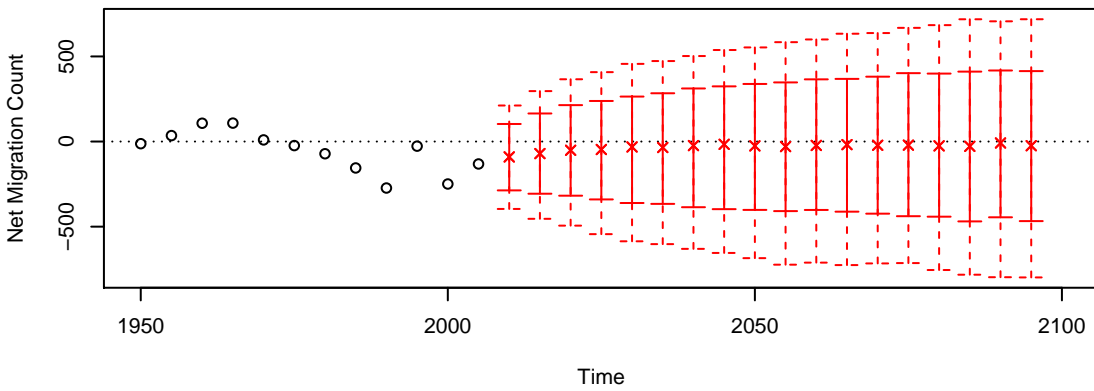

**Tajikistan Net Migrants (thousands)**

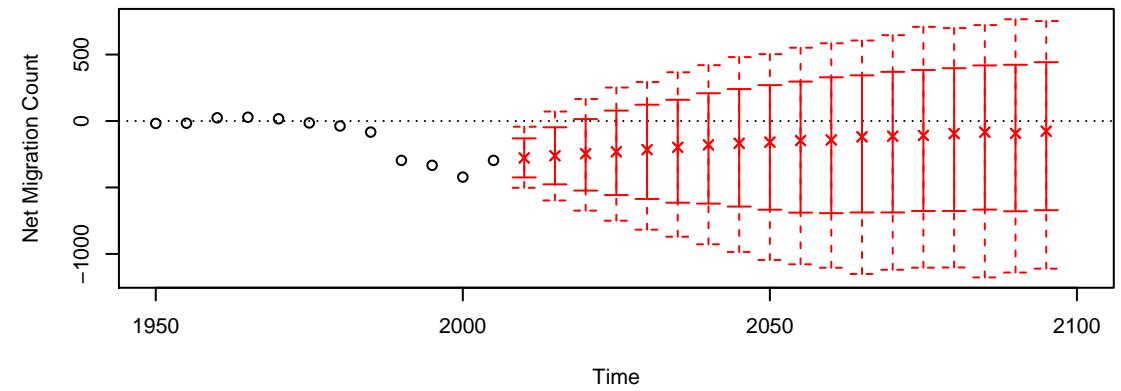

**Turkmenistan Net Migrants (thousands)**

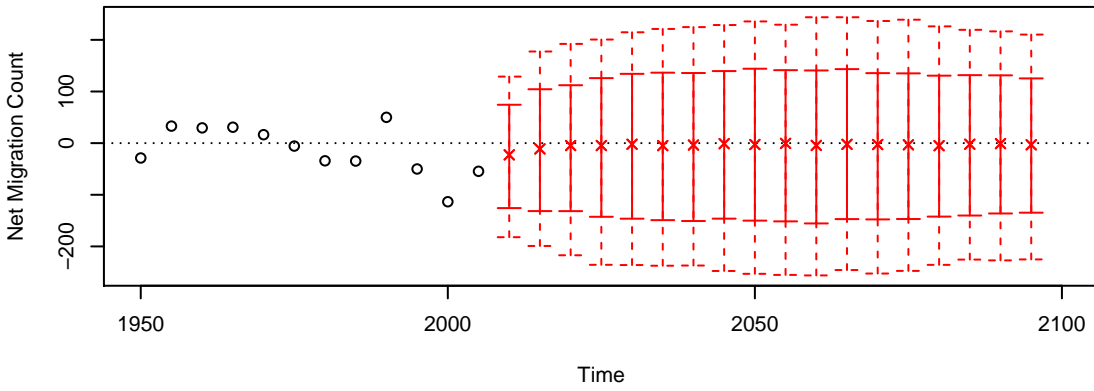

**Uzbekistan Net Migrants (thousands)**

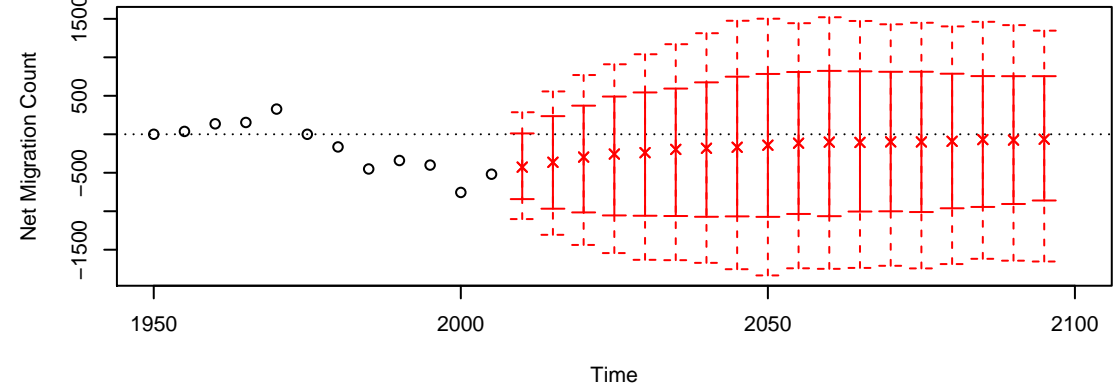

**Afghanistan Net Migrants (thousands)**

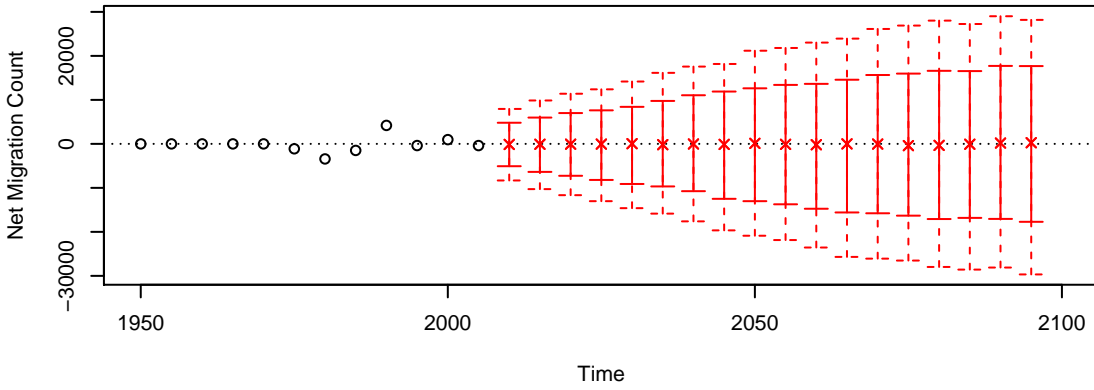

**Bangladesh Net Migrants (thousands)**

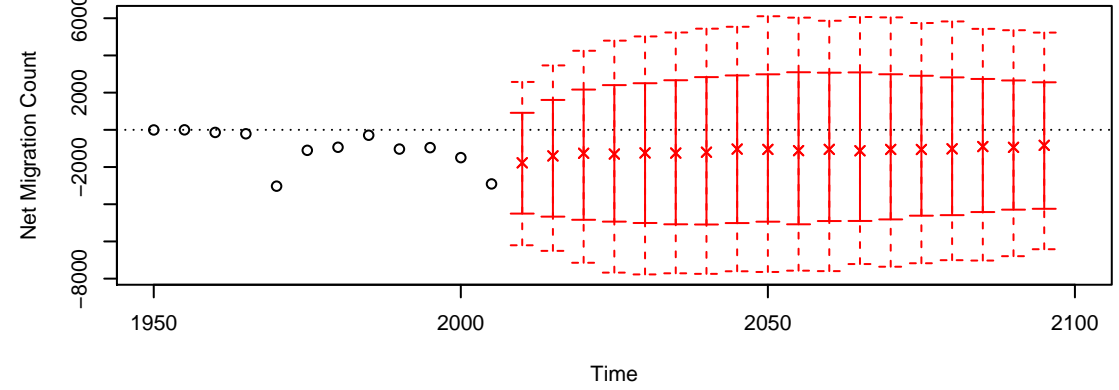

**Bhutan Net Migrants (thousands)**

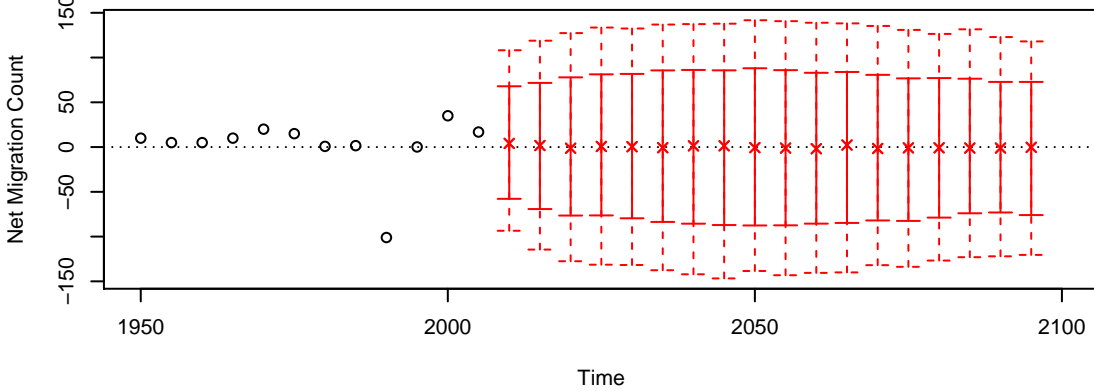

**India Net Migrants (thousands)**

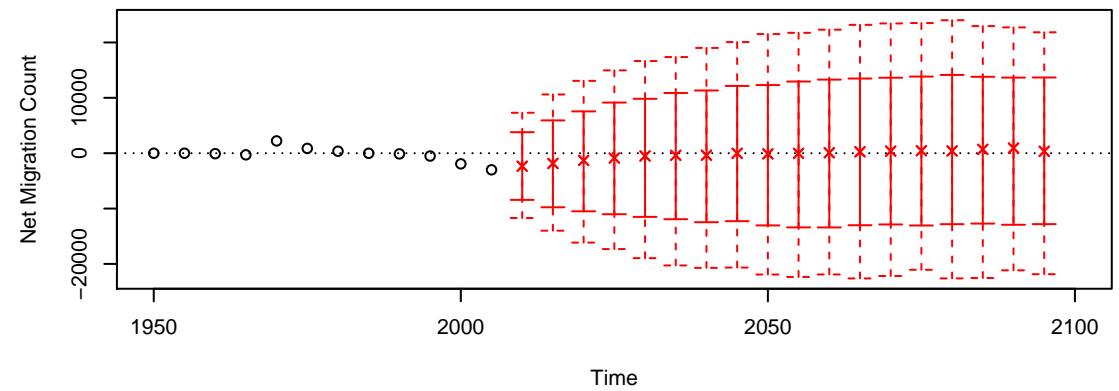

**Iran (Islamic Republic of) Net Migrants (thousands)**

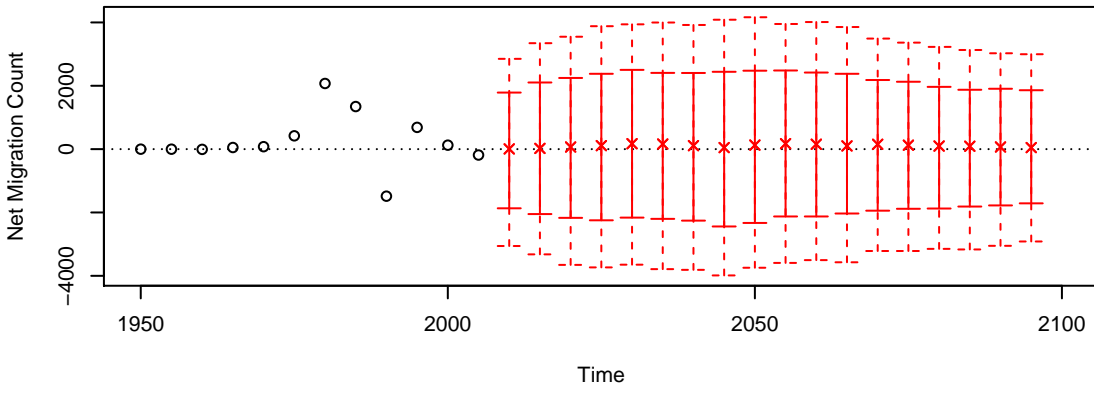

**Maldives Net Migrants (thousands)**

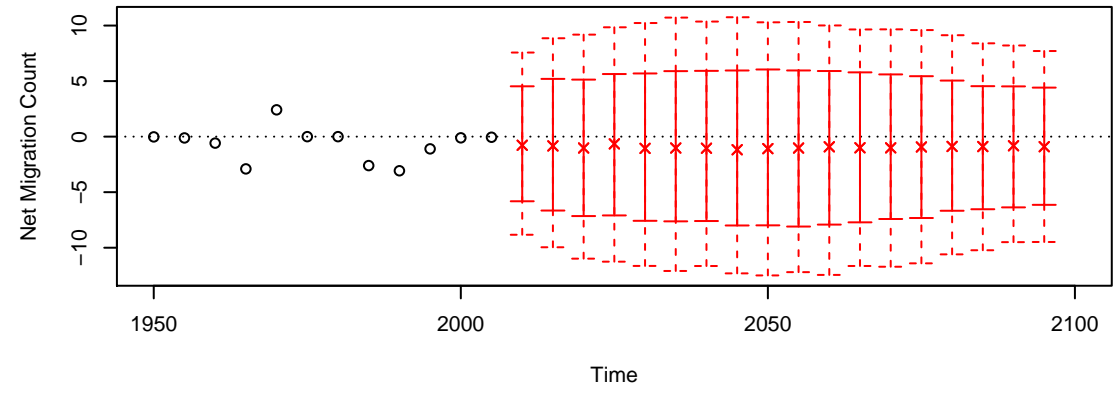

**Nepal Net Migrants (thousands)**

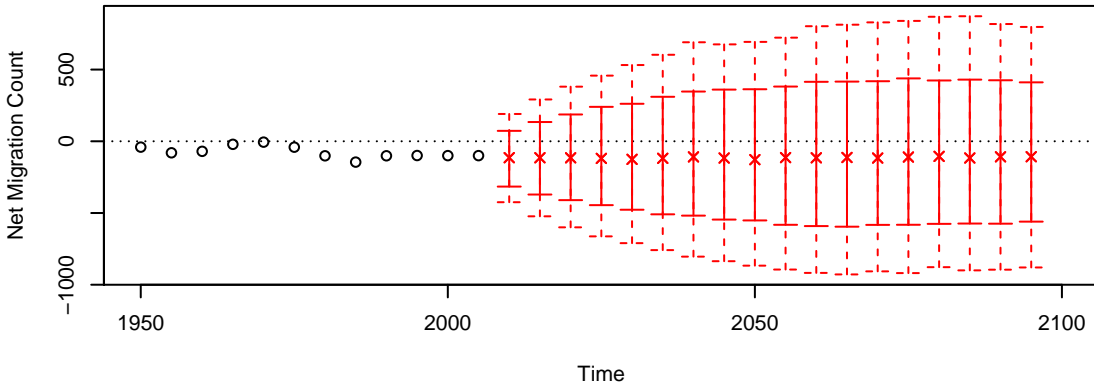

**Pakistan Net Migrants (thousands)**

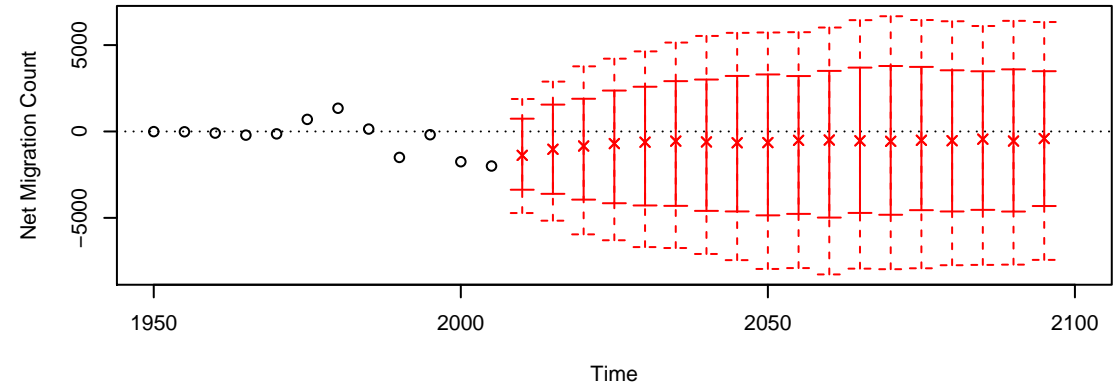

**Sri Lanka Net Migrants (thousands)**

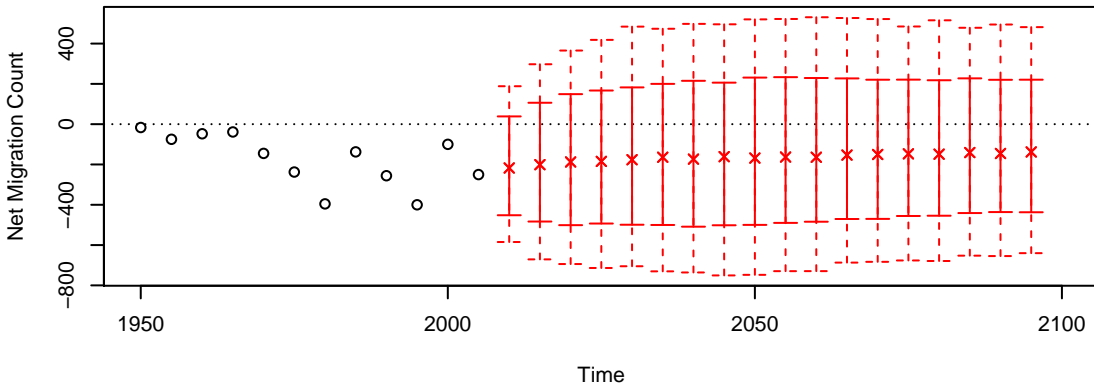

**Brunei Darussalam Net Migrants (thousands)**

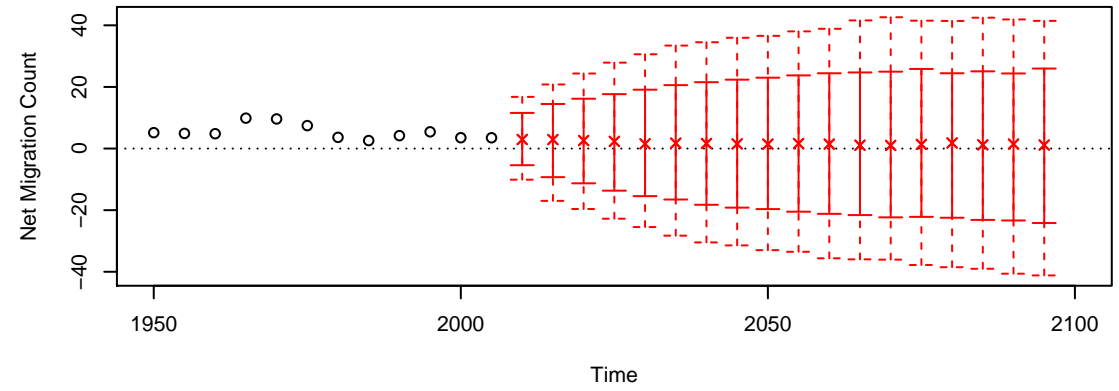

**Cambodia Net Migrants (thousands)**

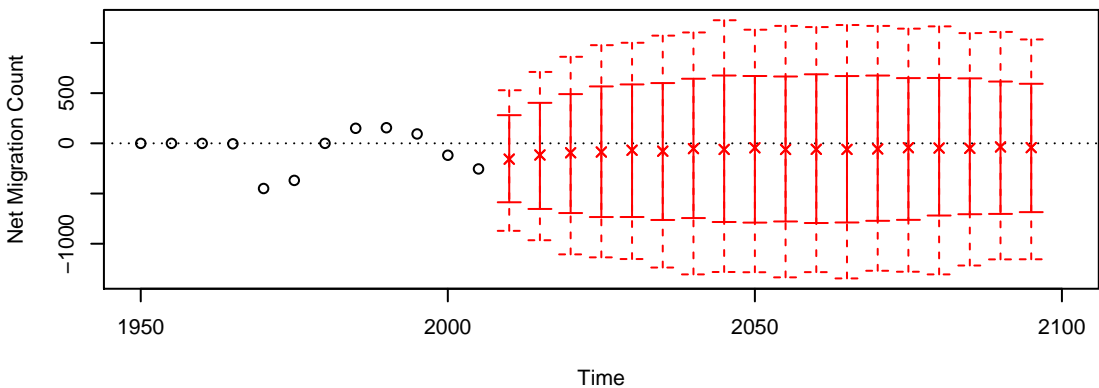

**Indonesia Net Migrants (thousands)**

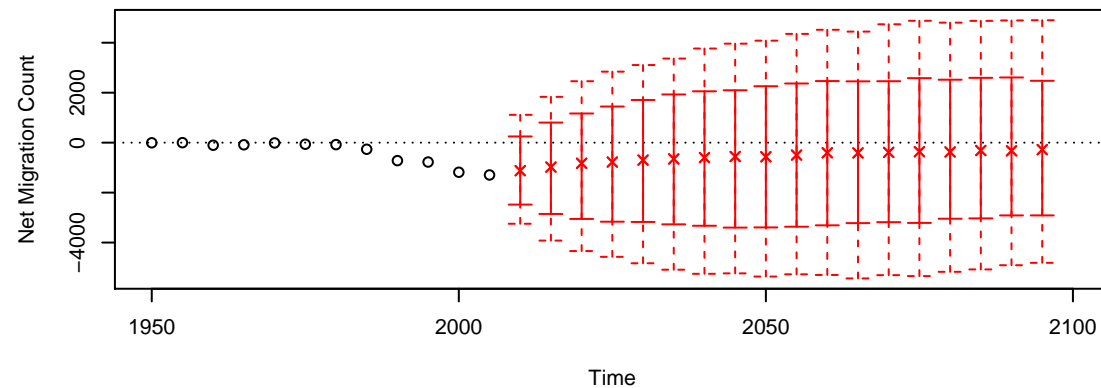

**Lao People's Democratic Republic Net Migrants (thousands)**

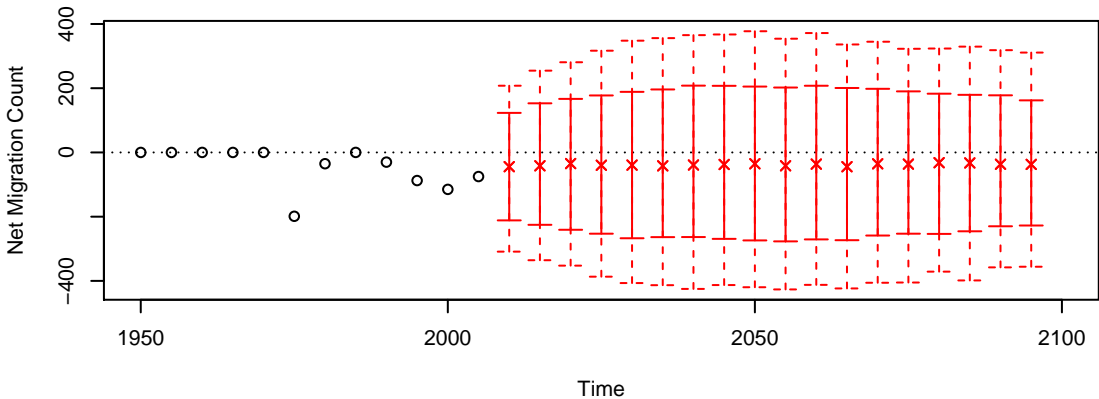

**Malaysia Net Migrants (thousands)**

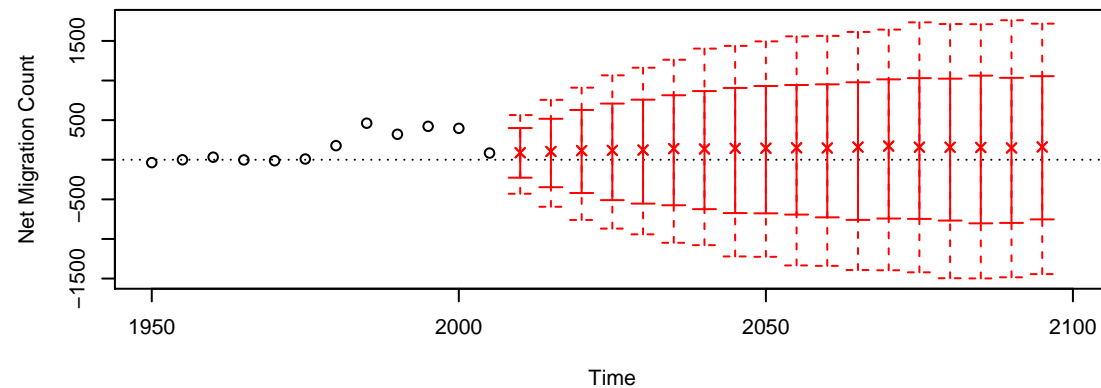

**Myanmar Net Migrants (thousands)**

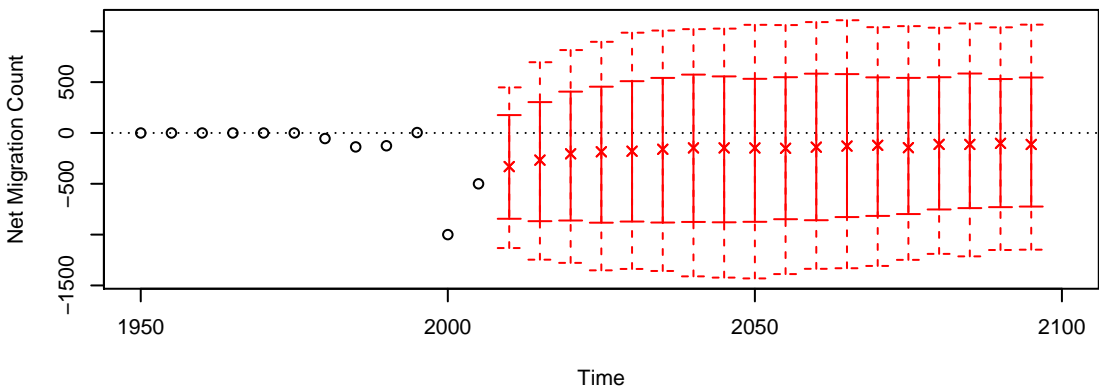

**Philippines Net Migrants (thousands)**

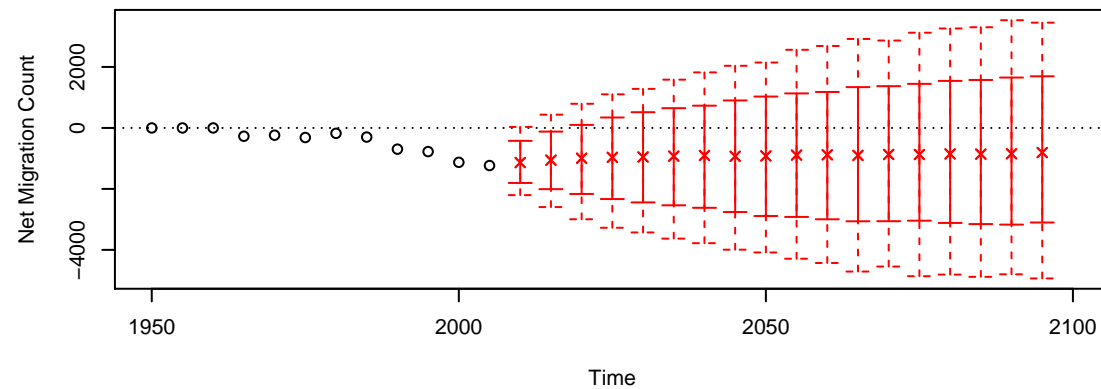

**Singapore Net Migrants (thousands)**

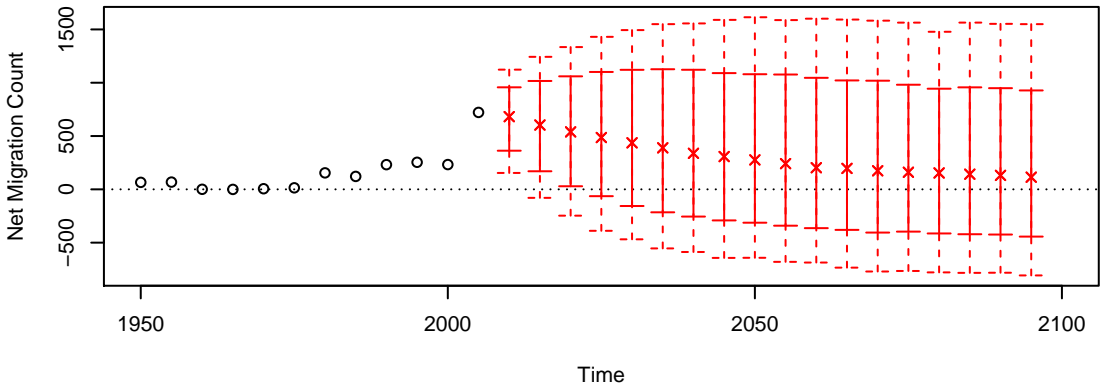

**Thailand Net Migrants (thousands)**

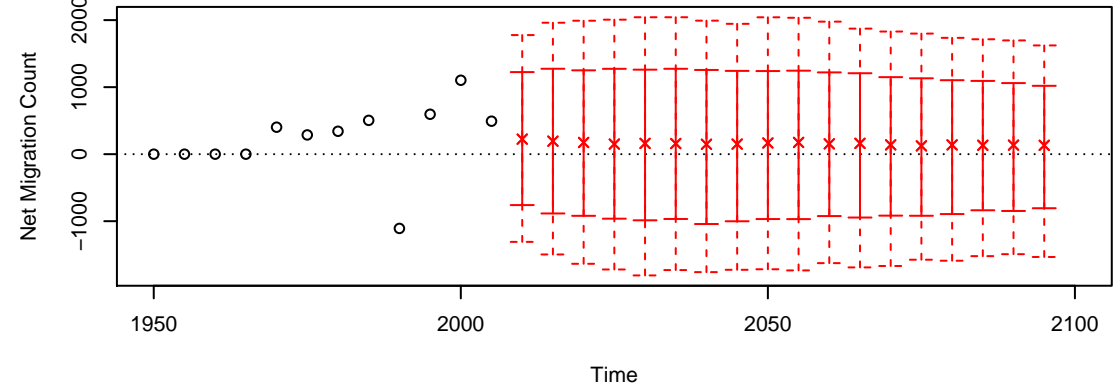

**Timor-Leste Net Migrants (thousands)**

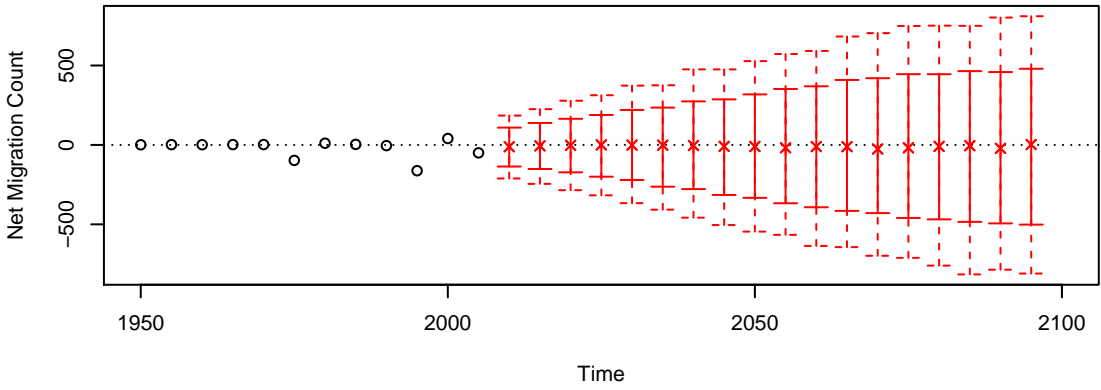

**Viet Nam Net Migrants (thousands)**

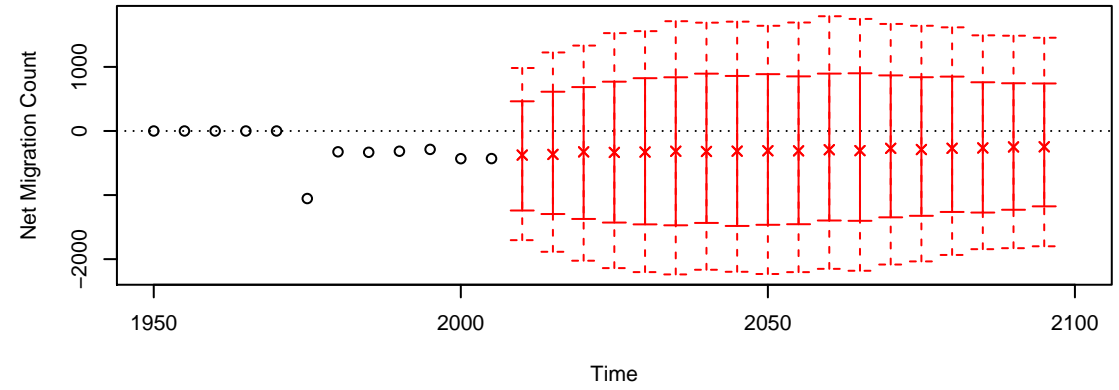

**Armenia Net Migrants (thousands)**

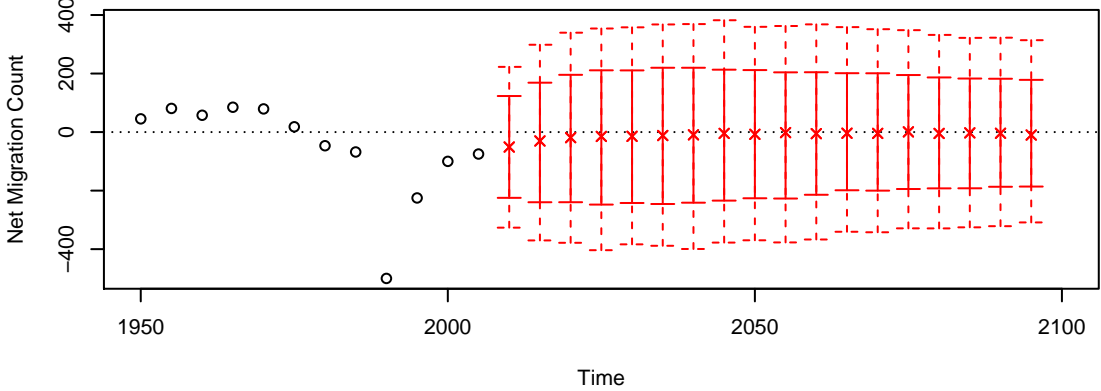

**Azerbaijan Net Migrants (thousands)**

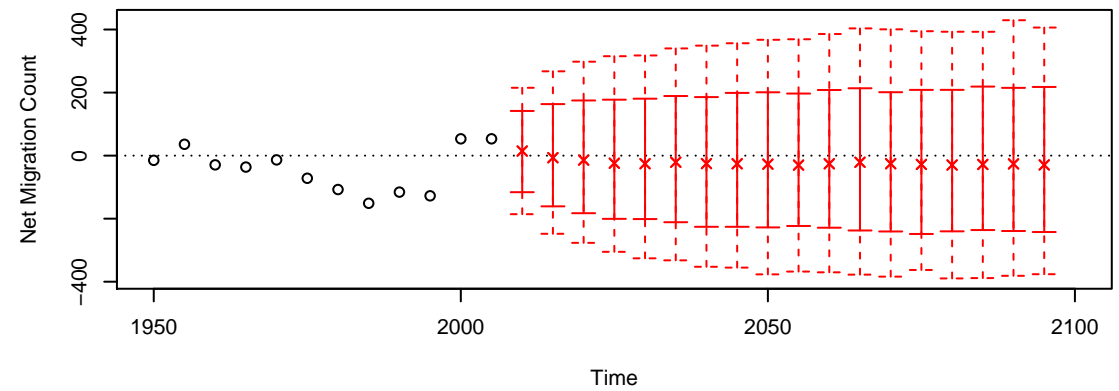

**Bahrain Net Migrants (thousands)**

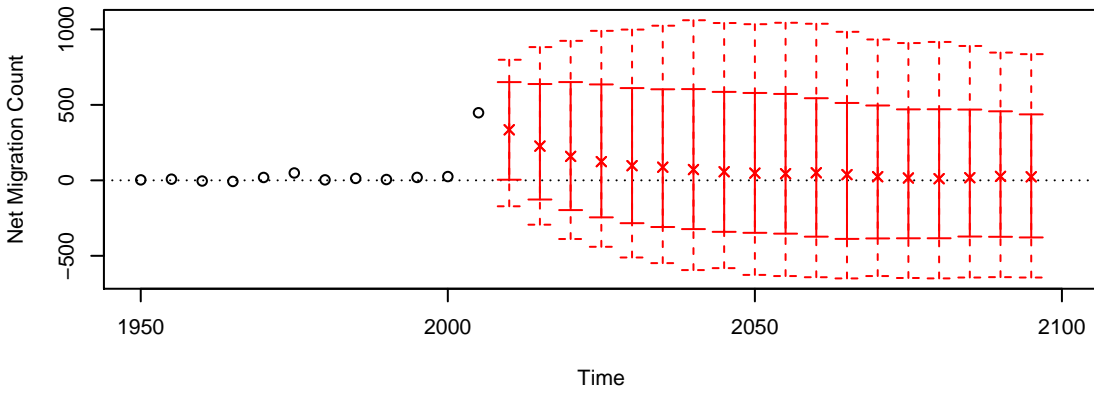

**Cyprus Net Migrants (thousands)**

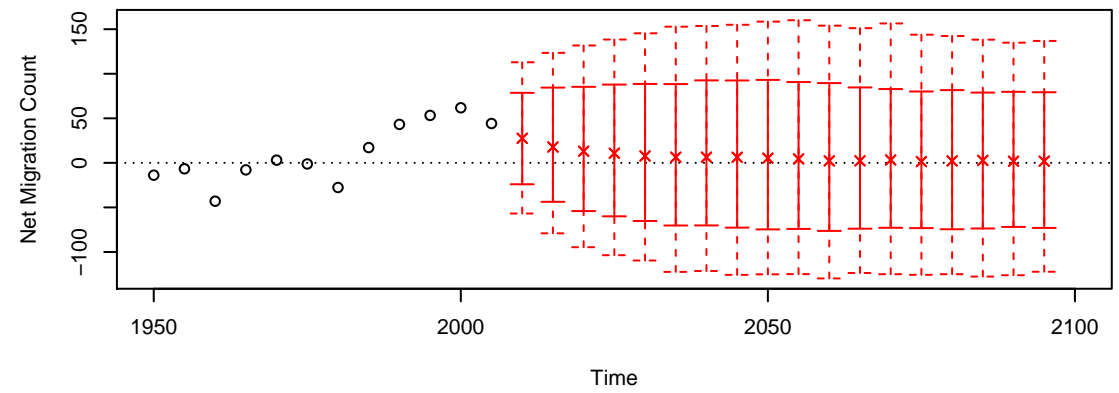

**Georgia Net Migrants (thousands)**

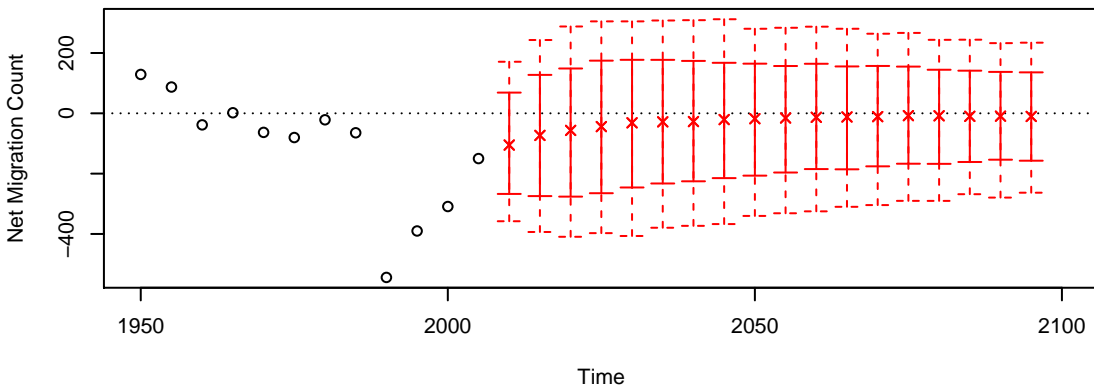

**Iraq Net Migrants (thousands)**

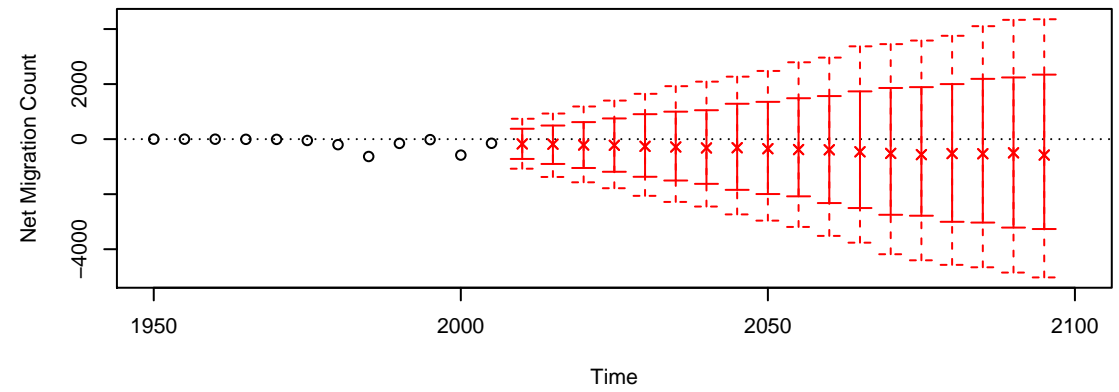

**Israel Net Migrants (thousands)**

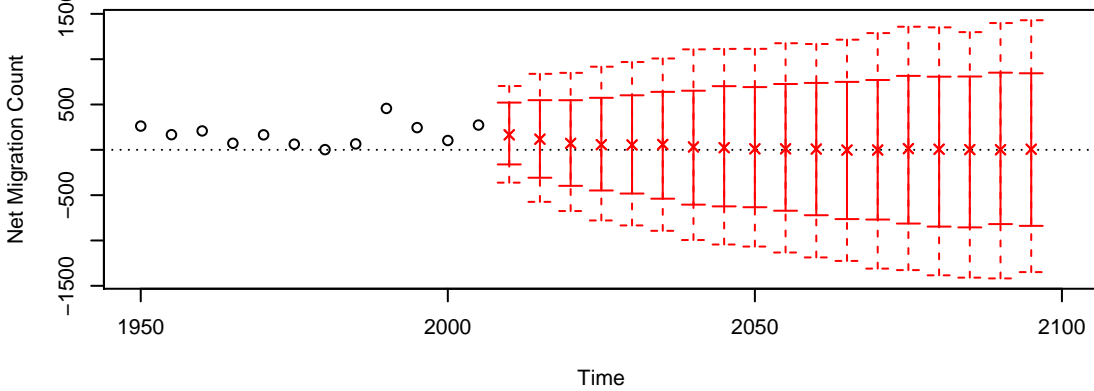

**Jordan Net Migrants (thousands)**

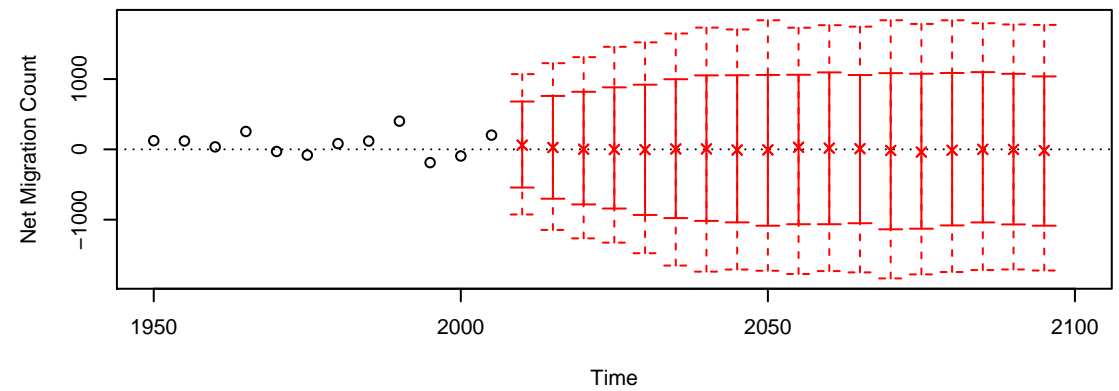



**Kuwait Net Migrants (thousands)**

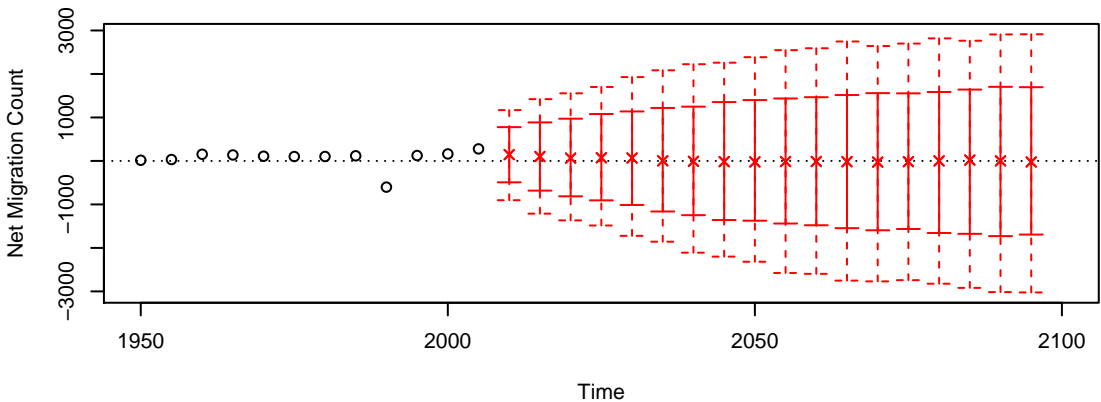

**Lebanon Net Migrants (thousands)**

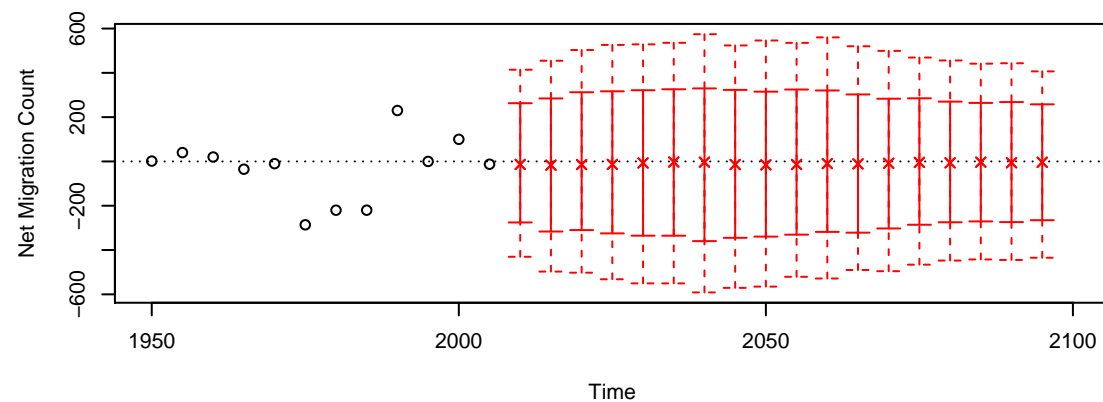

**Occupied Palestinian Territory Net Migrants (thousands)**

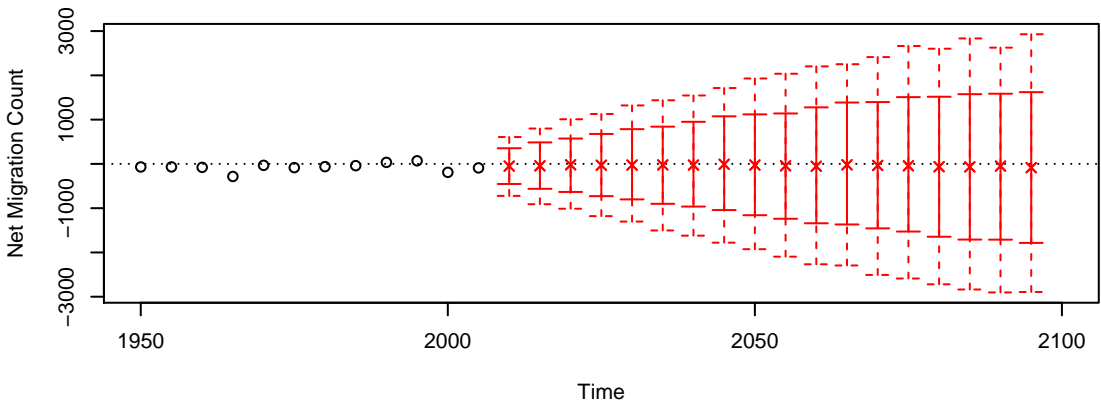

**Oman Net Migrants (thousands)**

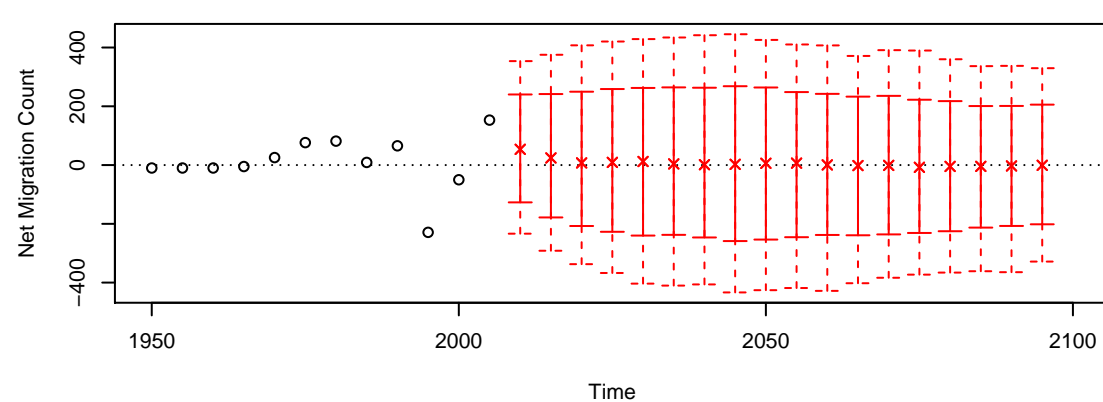

**Qatar Net Migrants (thousands)**

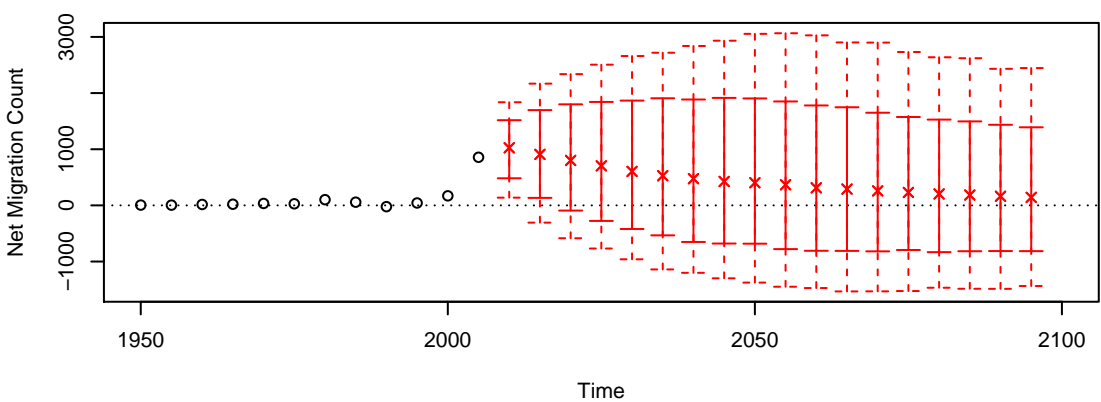

**Saudi Arabia Net Migrants (thousands)**

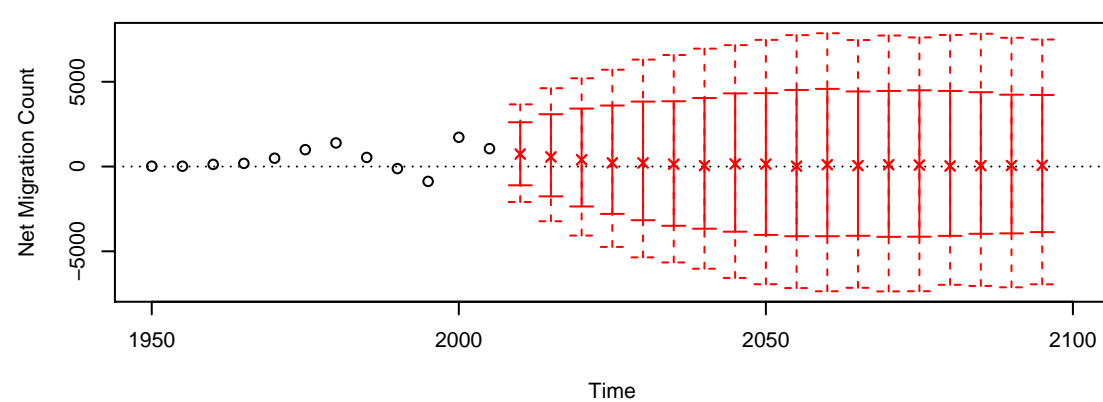

**Syrian Arab Republic Net Migrants (thousands)**

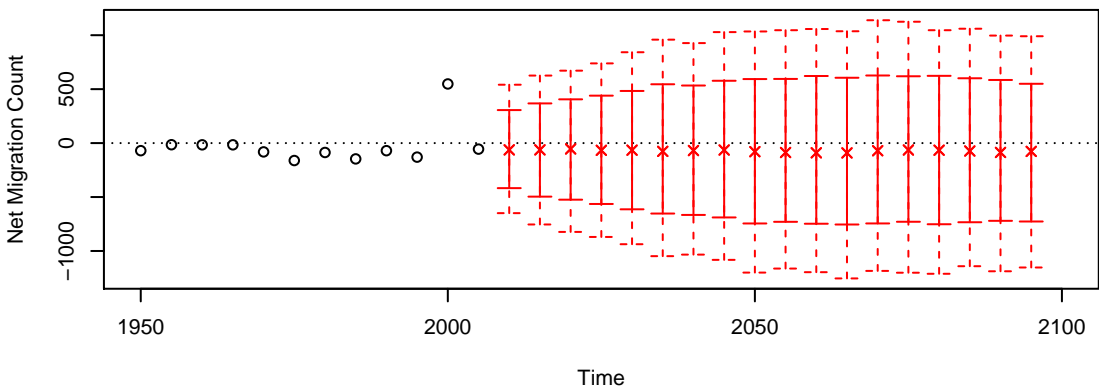

**Turkey Net Migrants (thousands)**

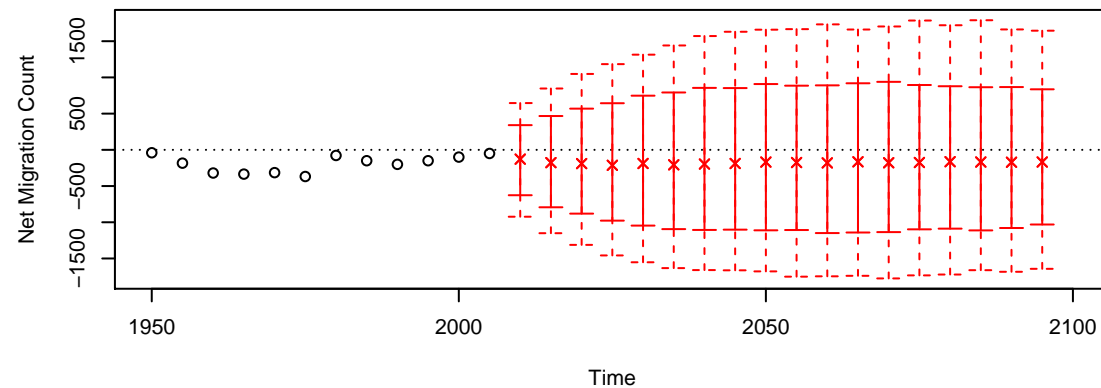

**United Arab Emirates Net Migrants (thousands)**

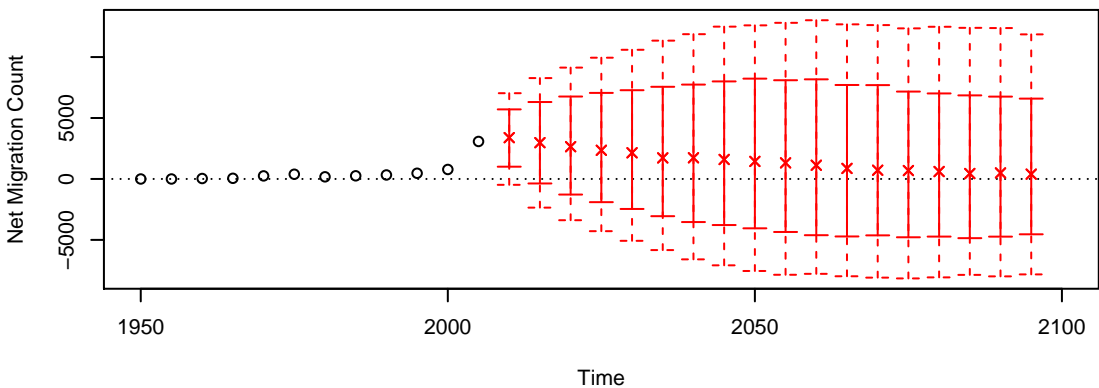

**Yemen Net Migrants (thousands)**

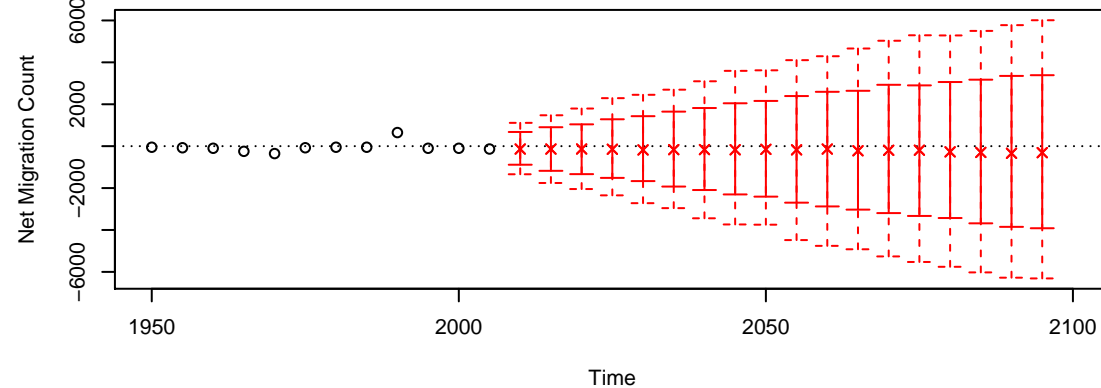

**Belarus Net Migrants (thousands)**

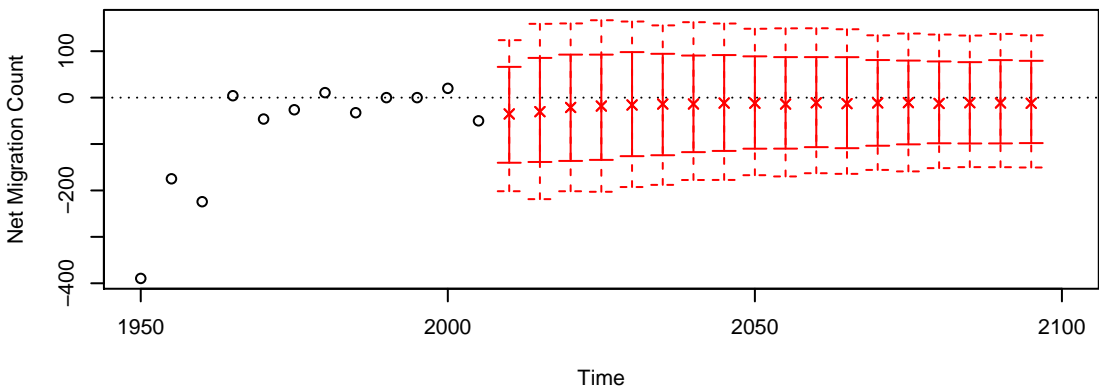

**Bulgaria Net Migrants (thousands)**

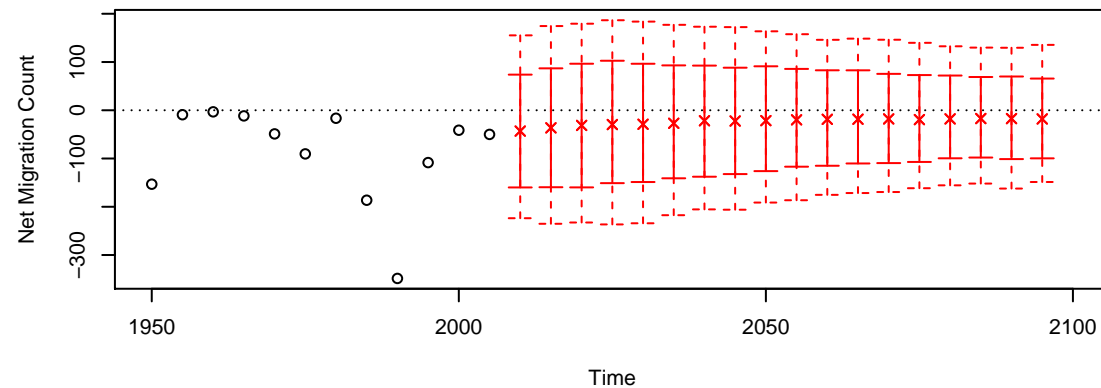

**Czech Republic Net Migrants (thousands)**

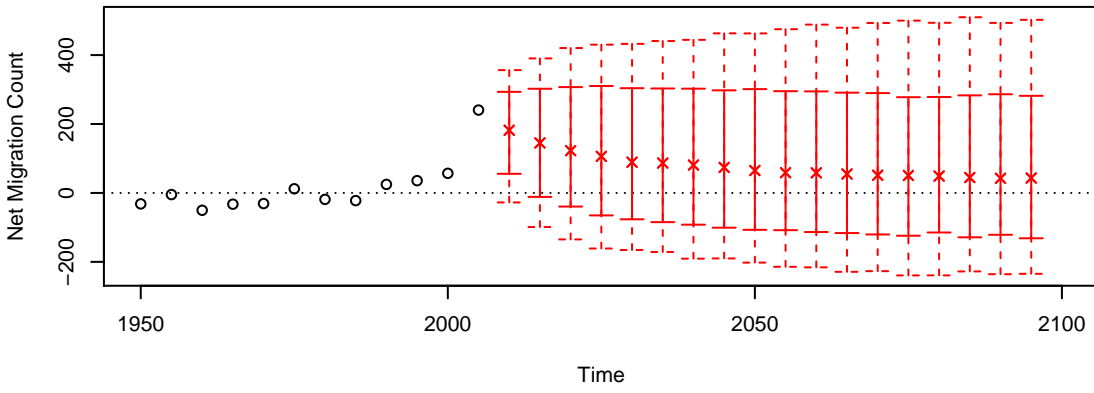

**Hungary Net Migrants (thousands)**

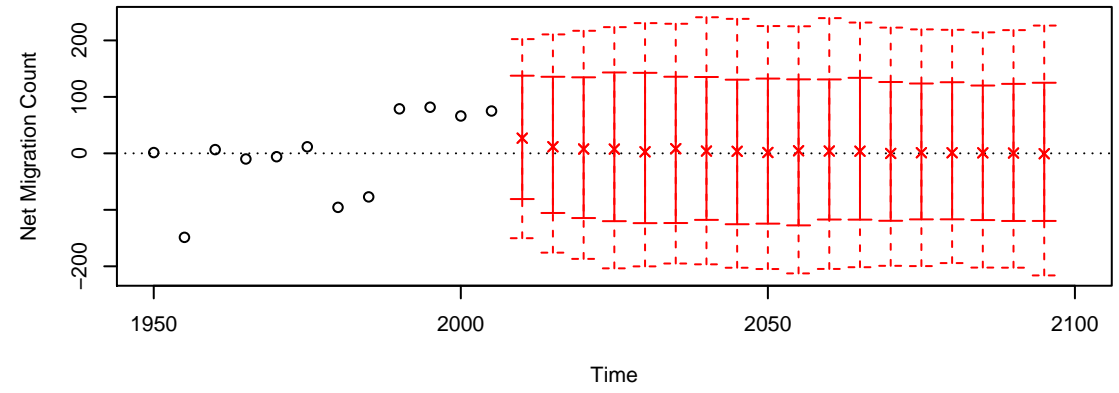

**Poland Net Migrants (thousands)**

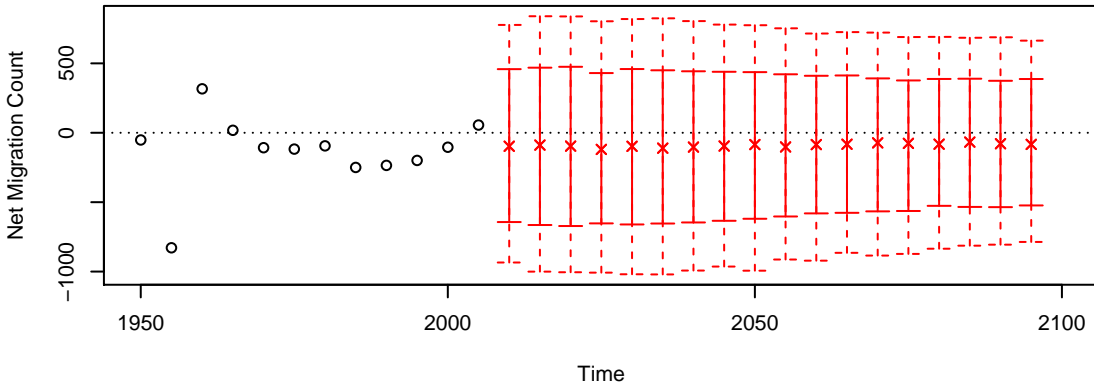

**Republic of Moldova Net Migrants (thousands)**

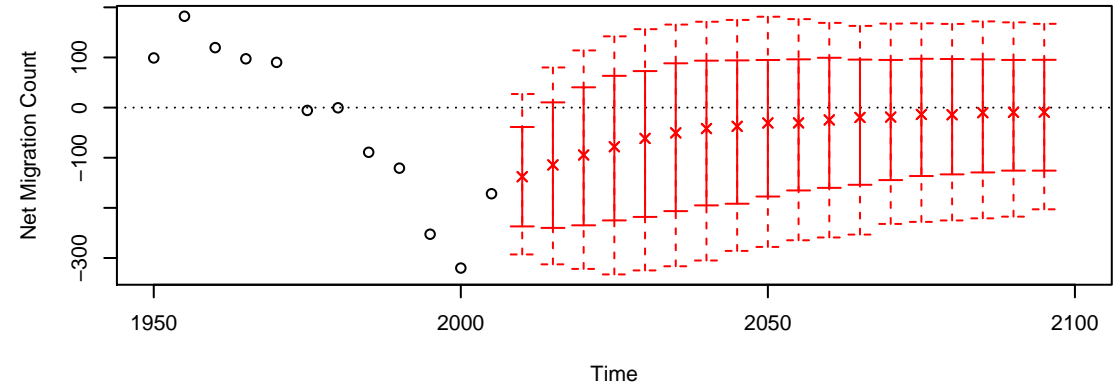

**Romania Net Migrants (thousands)**

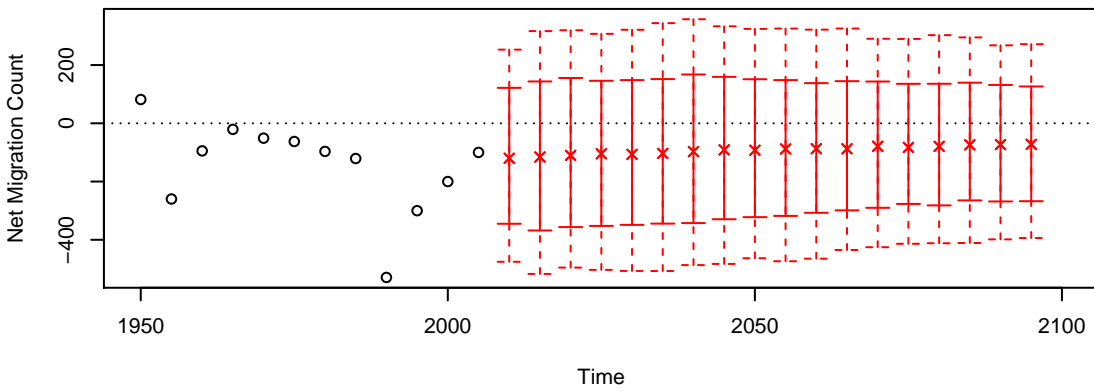

**Russian Federation Net Migrants (thousands)**

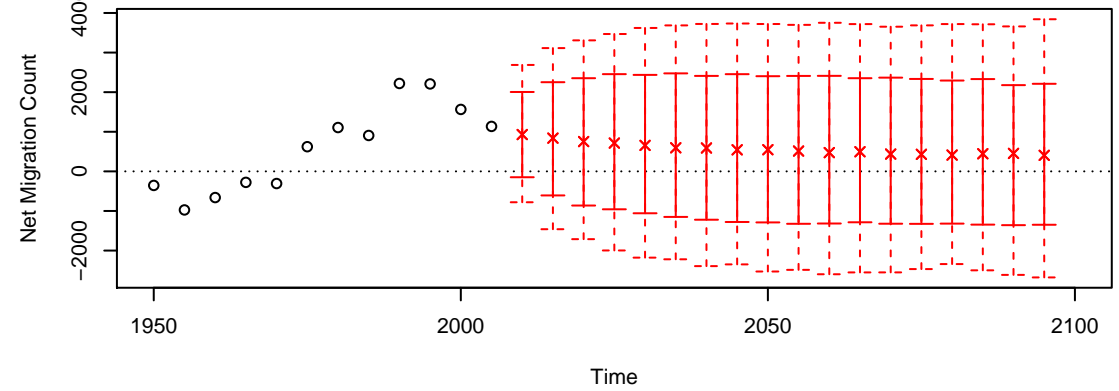

**Slovakia Net Migrants (thousands)**

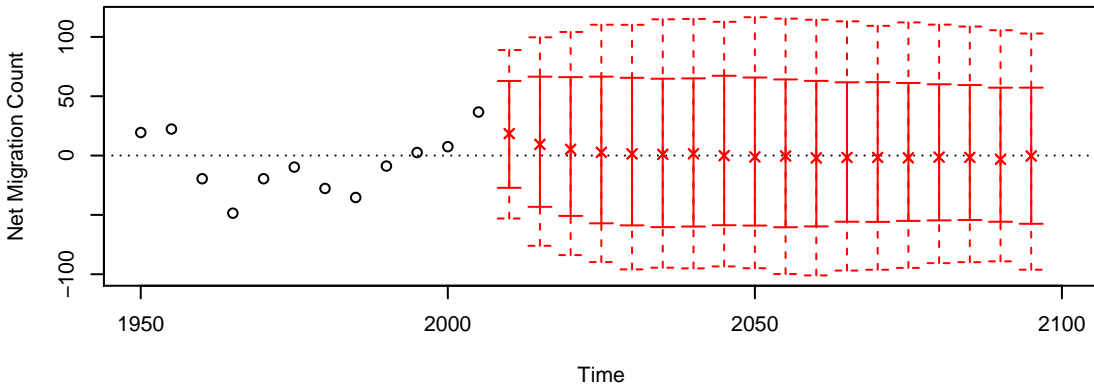

**Ukraine Net Migrants (thousands)**

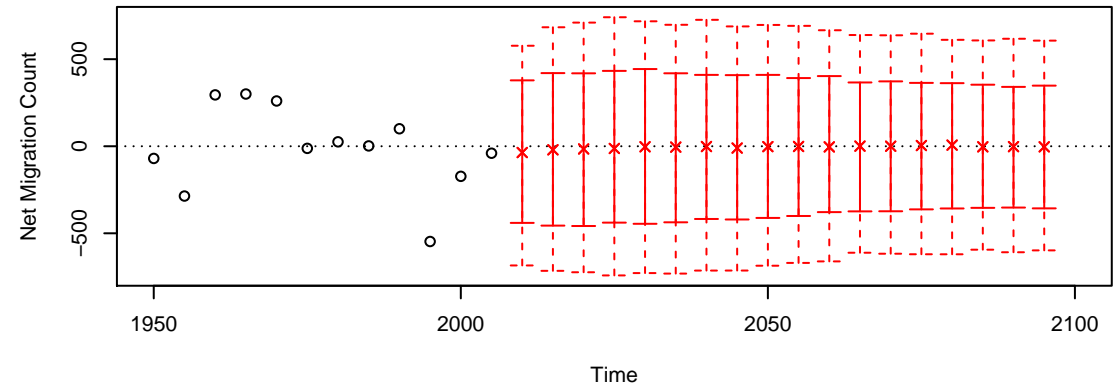

**Channel Islands Net Migrants (thousands)**

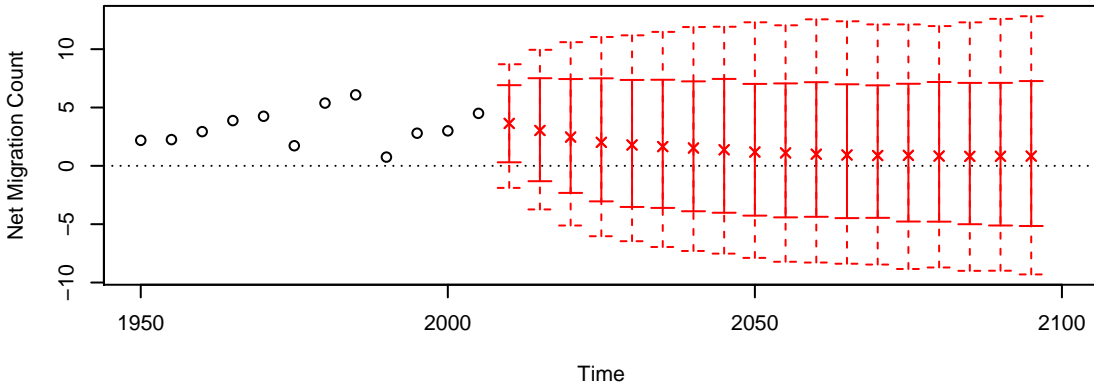

**Denmark Net Migrants (thousands)**

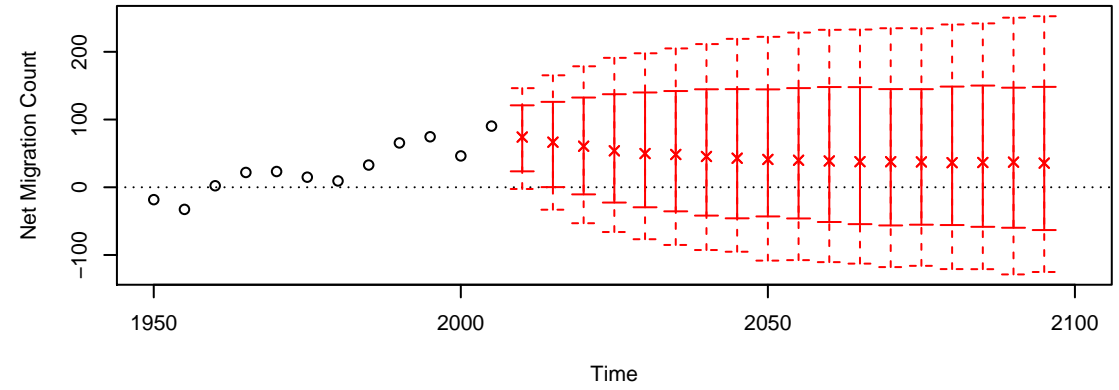

**Estonia Net Migrants (thousands)**

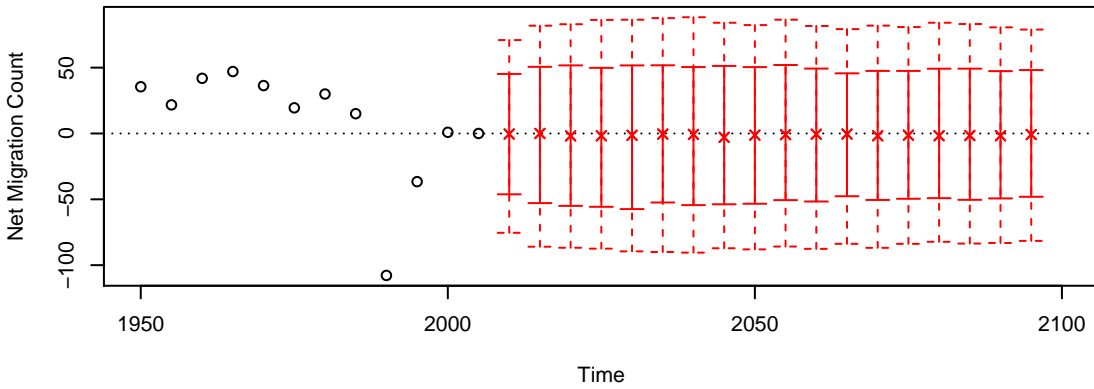

**Finland Net Migrants (thousands)**

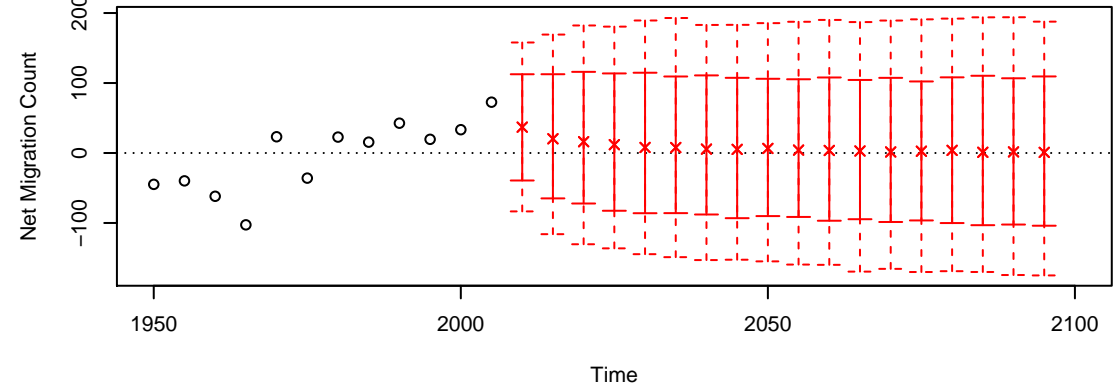

**Iceland Net Migrants (thousands)**

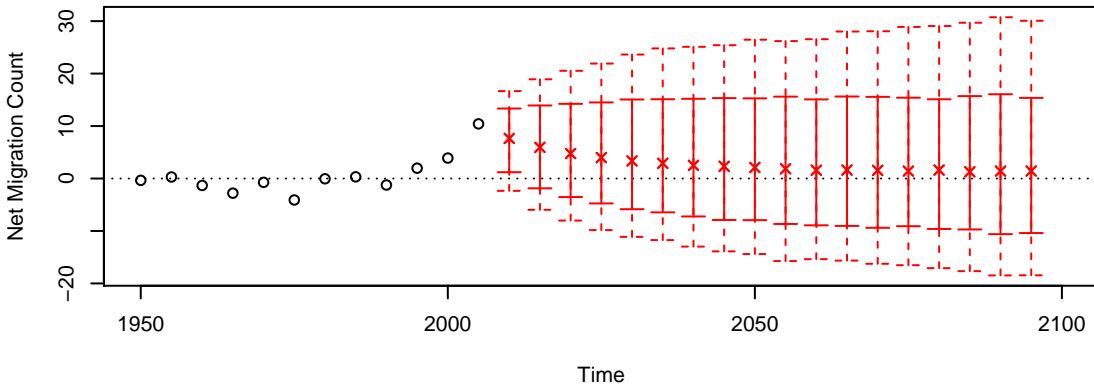

**Ireland Net Migrants (thousands)**

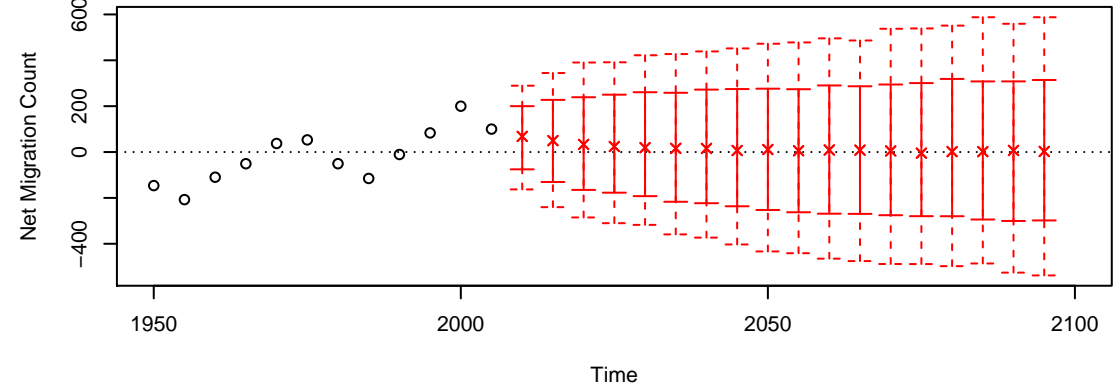

**Latvia Net Migrants (thousands)**

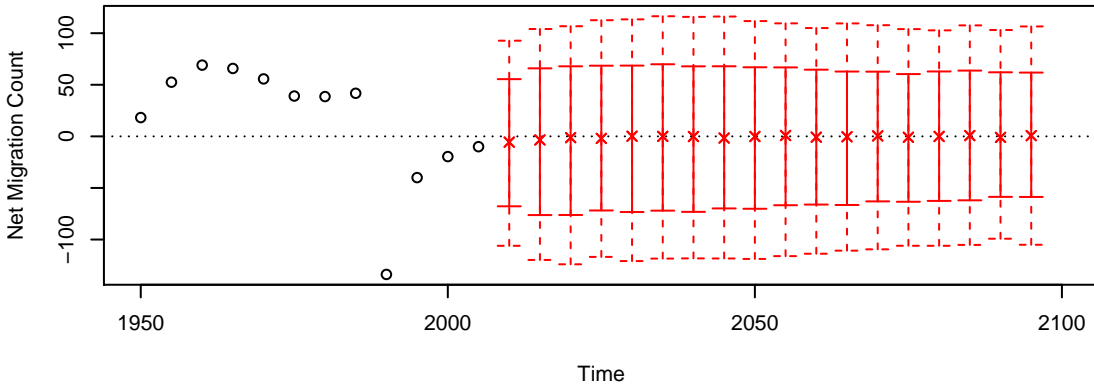

**Lithuania Net Migrants (thousands)**

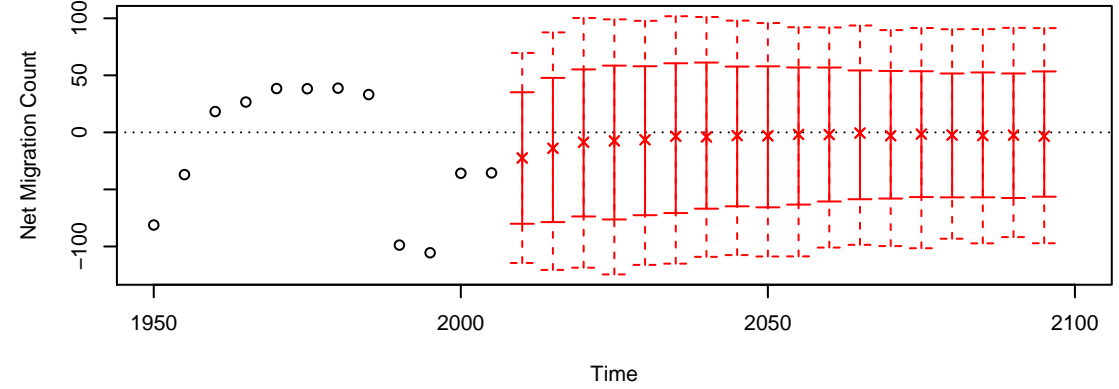

**Norway Net Migrants (thousands)**

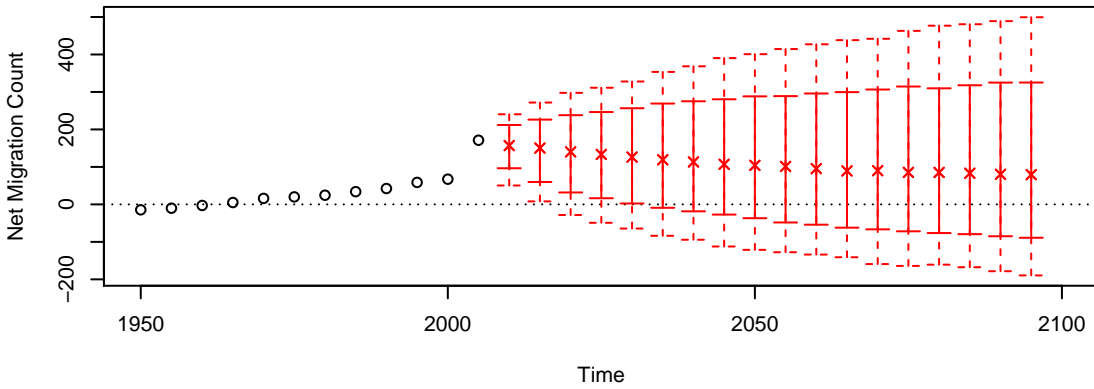

**Sweden Net Migrants (thousands)**

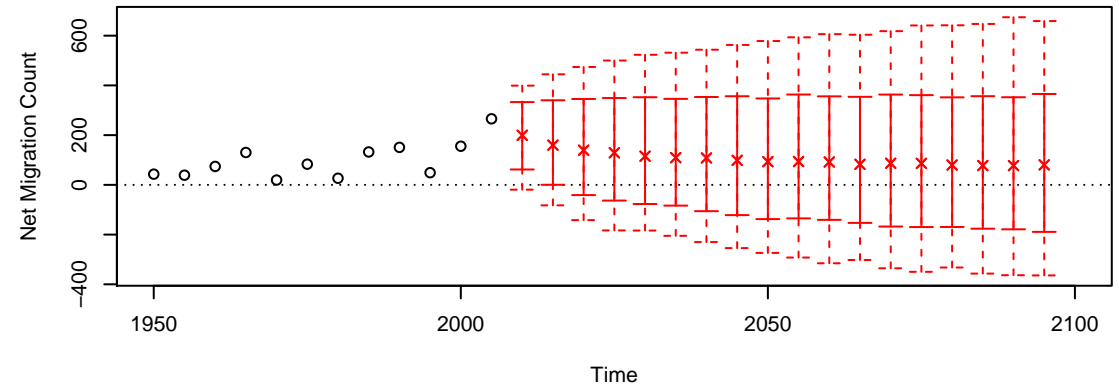

**United Kingdom Net Migrants (thousands)**

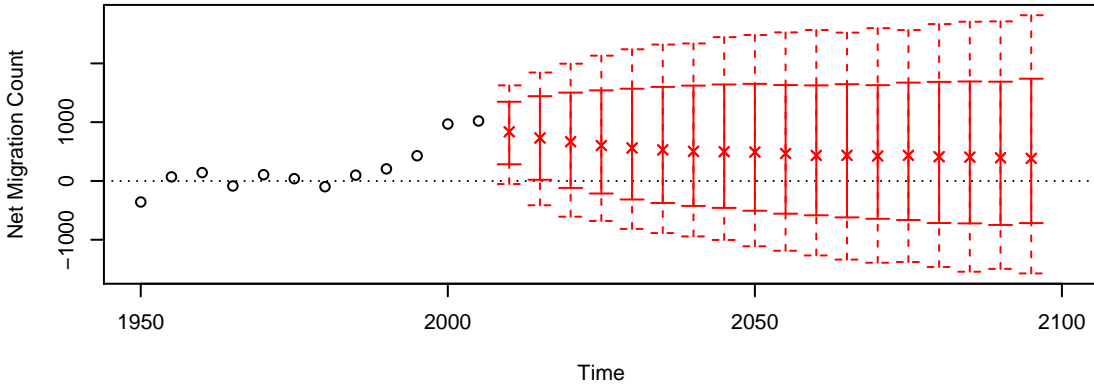

**Albania Net Migrants (thousands)**

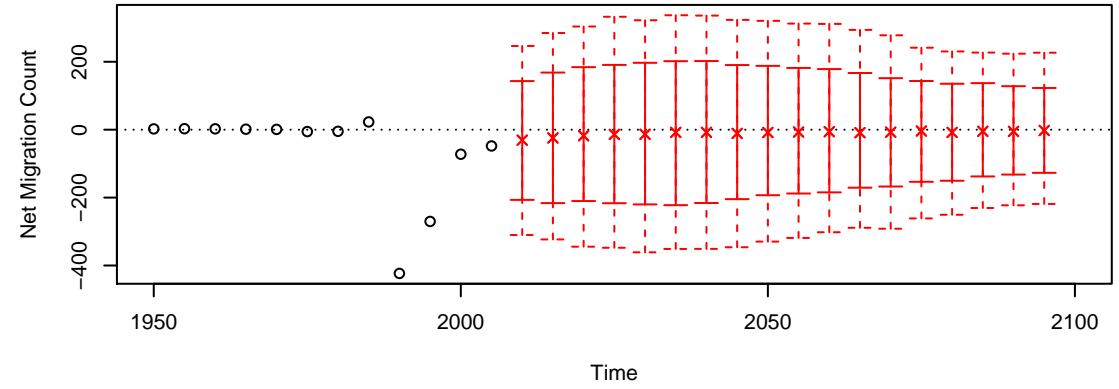

**Bosnia and Herzegovina Net Migrants (thousands)**

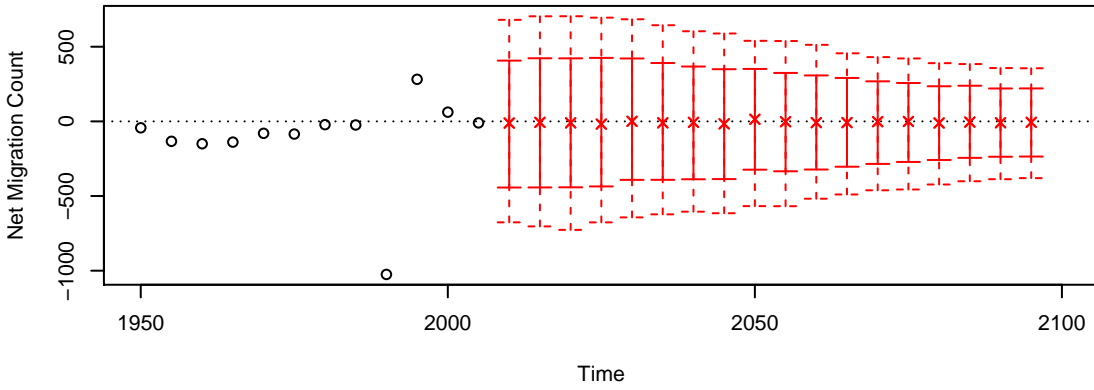

**Croatia Net Migrants (thousands)**

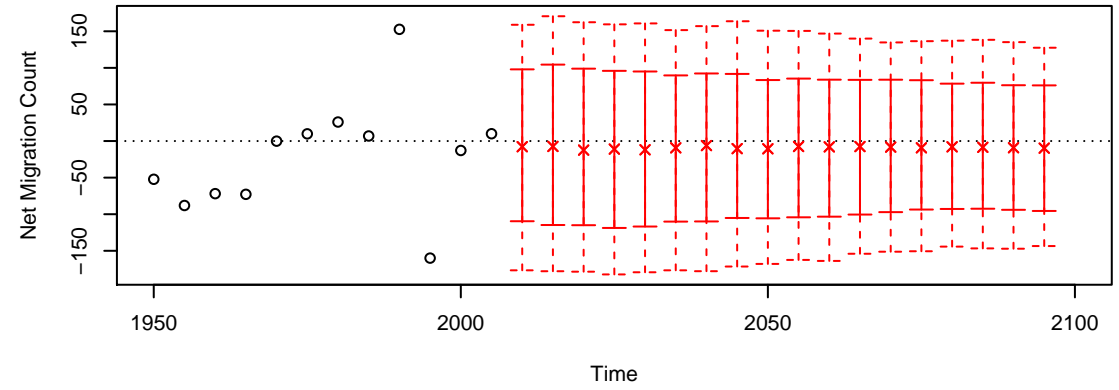

**Greece Net Migrants (thousands)**

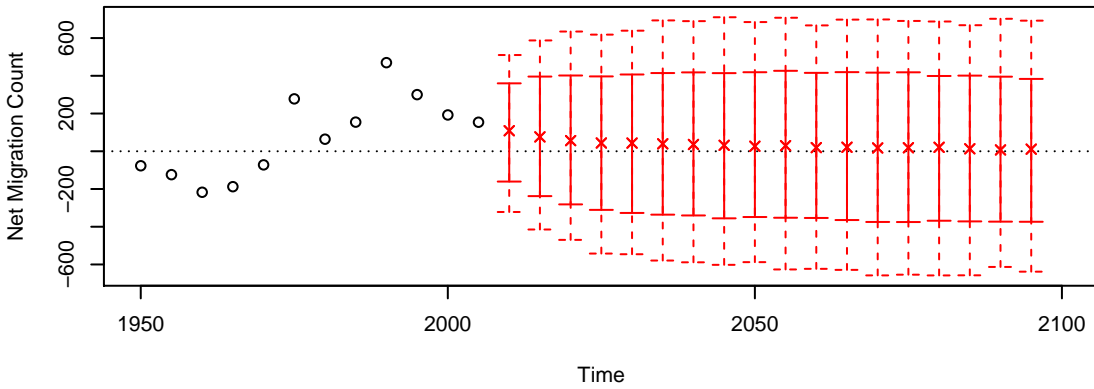

**Italy Net Migrants (thousands)**

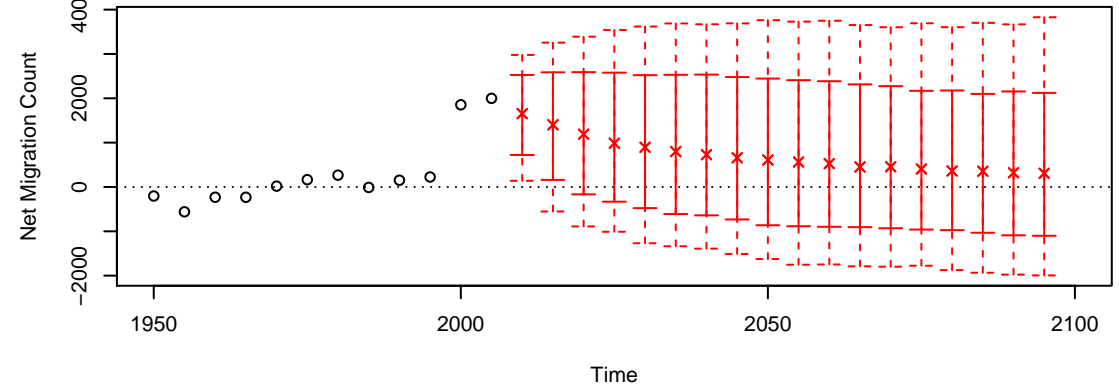

**Malta Net Migrants (thousands)**

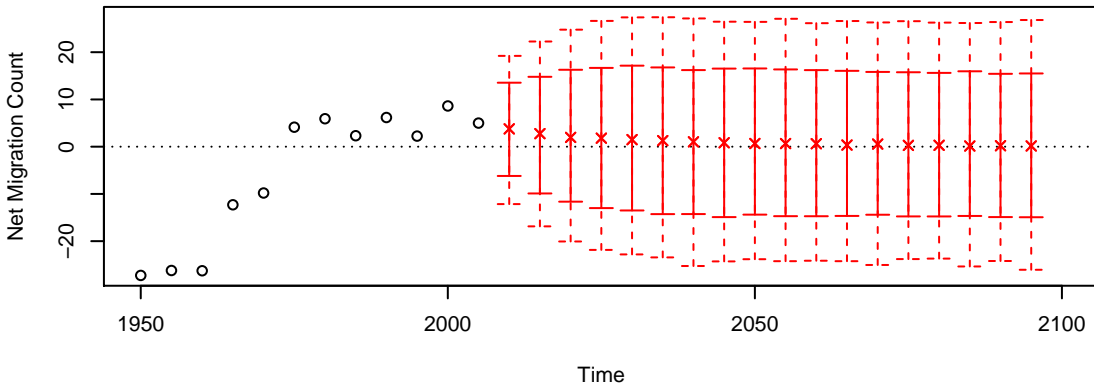

**Montenegro Net Migrants (thousands)**

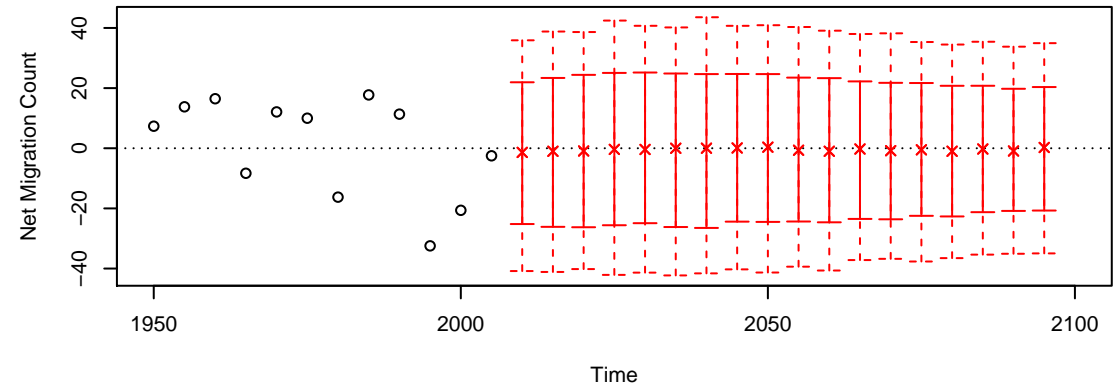

**Portugal Net Migrants (thousands)**

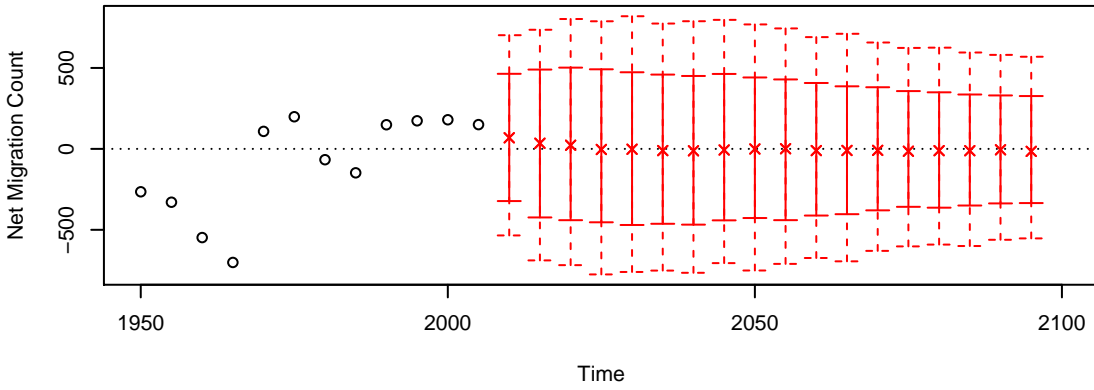

**Serbia Net Migrants (thousands)**

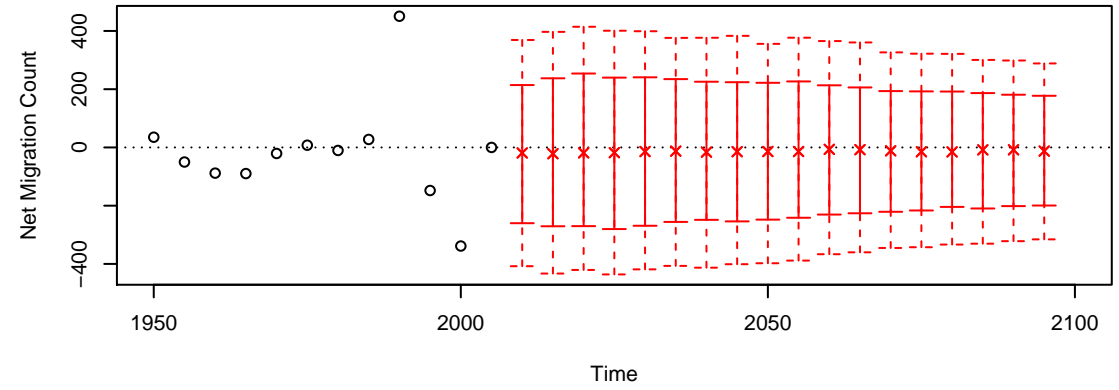

**Slovenia Net Migrants (thousands)**

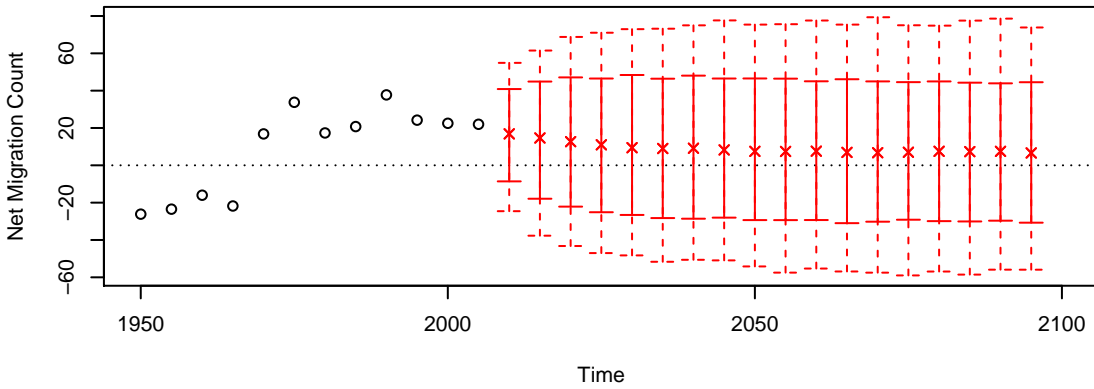

**Spain Net Migrants (thousands)**

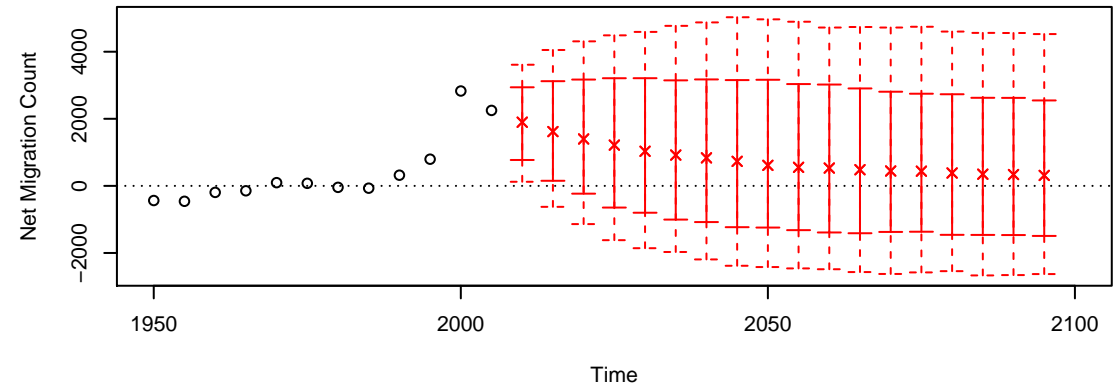

**TFYR Macedonia Net Migrants (thousands)**

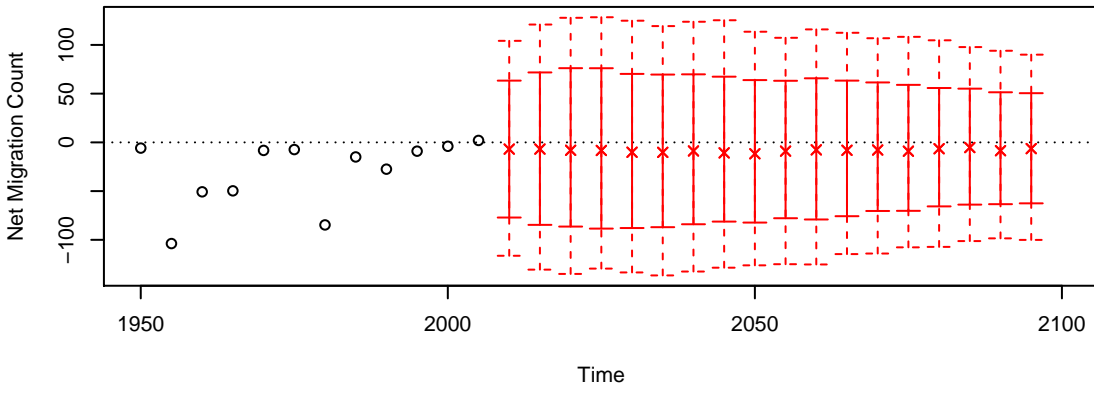

**Austria Net Migrants (thousands)**

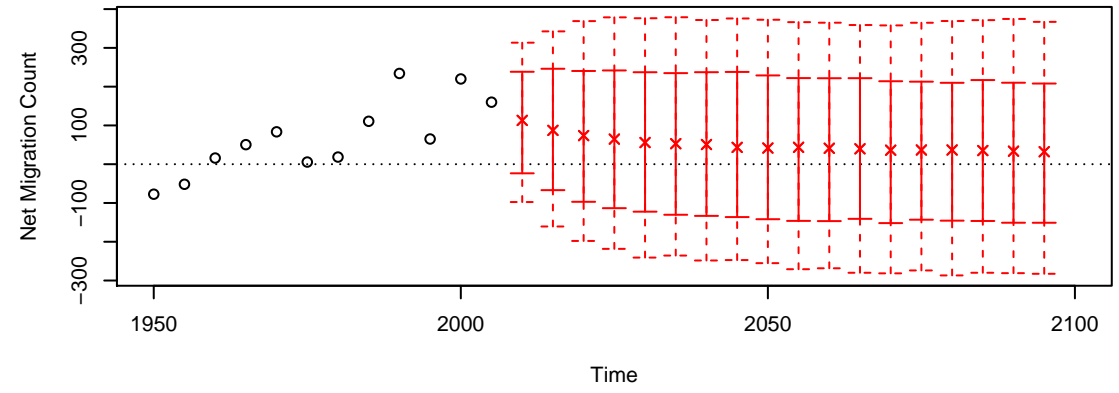

**Belgium Net Migrants (thousands)**

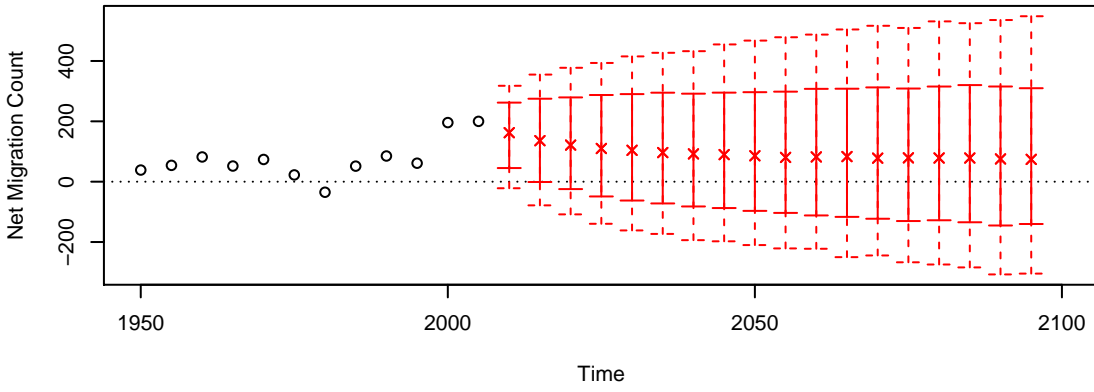

**France Net Migrants (thousands)**

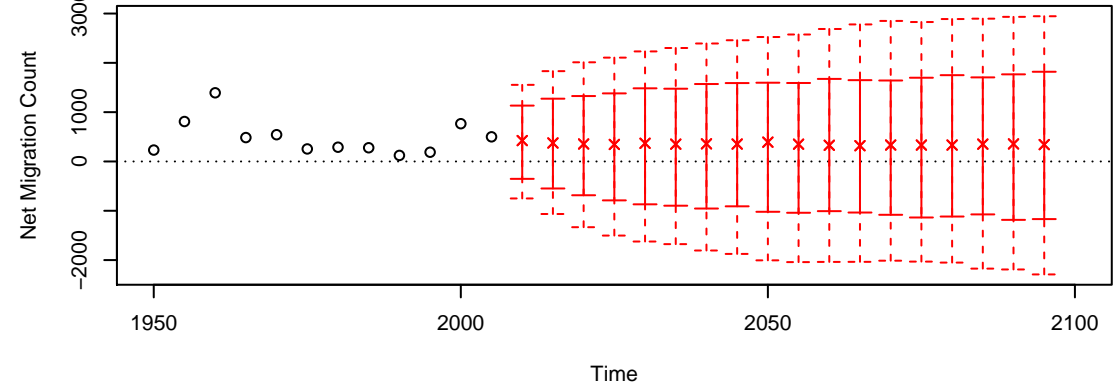

**Germany Net Migrants (thousands)**

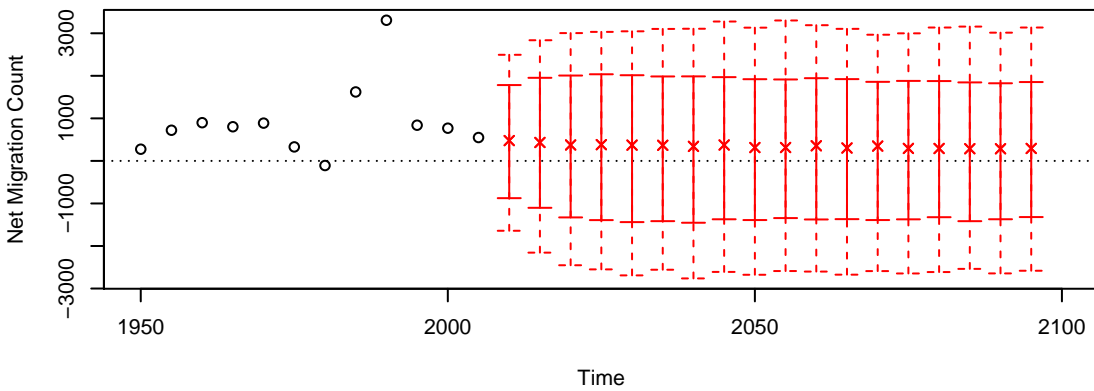

**Luxembourg Net Migrants (thousands)**

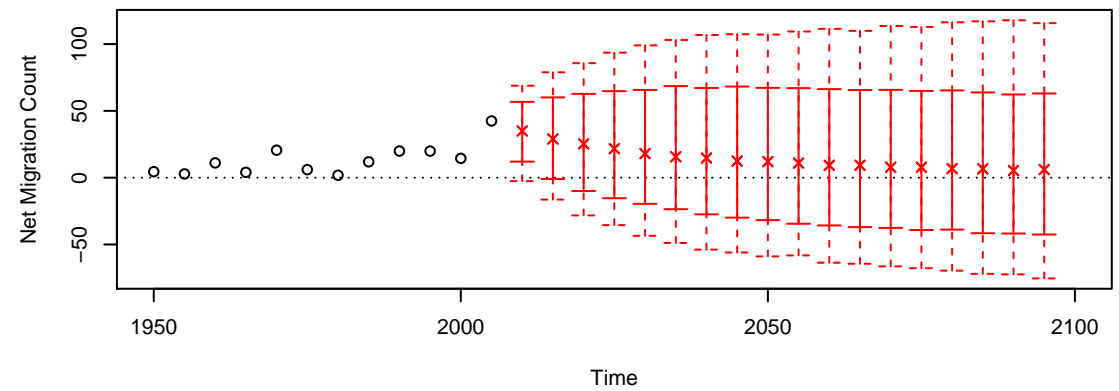



**Netherlands Net Migrants (thousands)**

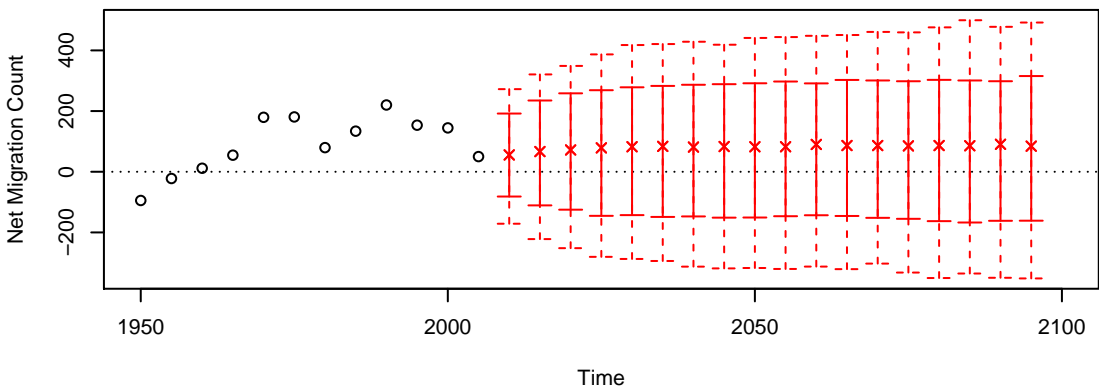

**Switzerland Net Migrants (thousands)**

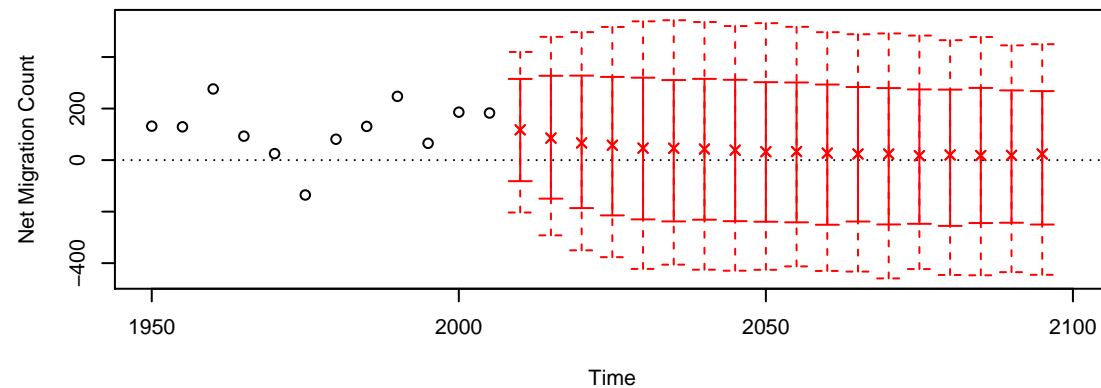

**Aruba Net Migrants (thousands)**

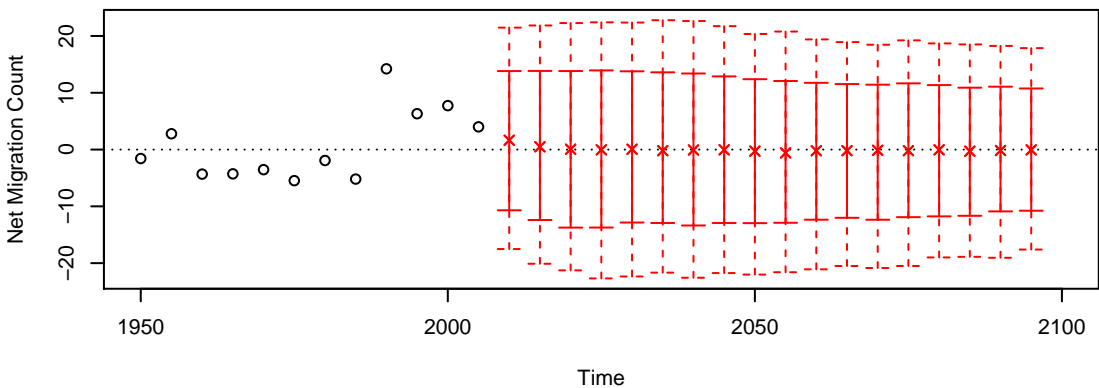

**Bahamas Net Migrants (thousands)**

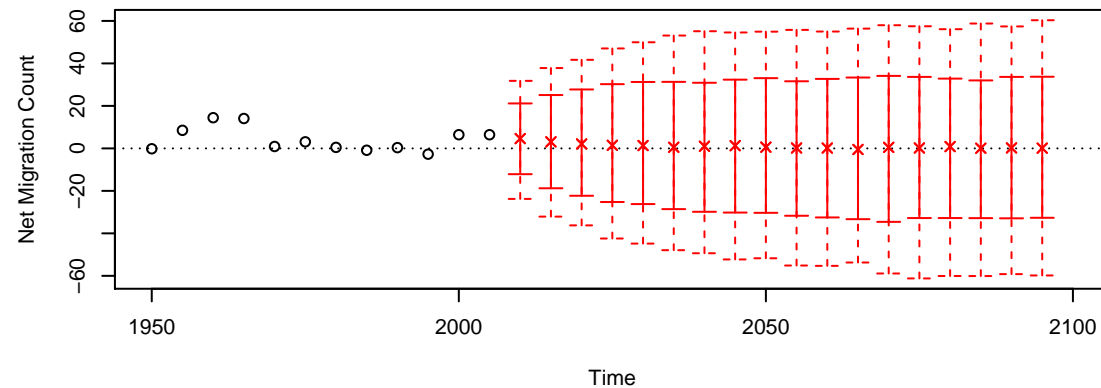

**Barbados Net Migrants (thousands)**

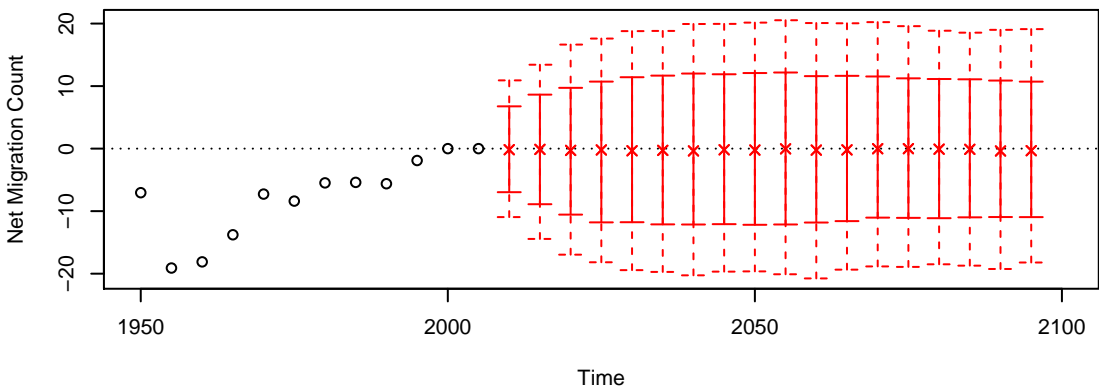

**Cuba Net Migrants (thousands)**

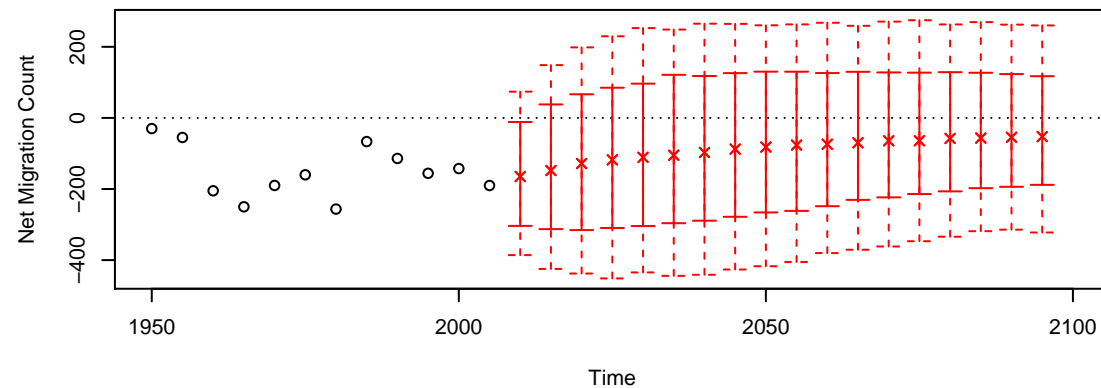

**Dominican Republic Net Migrants (thousands)**

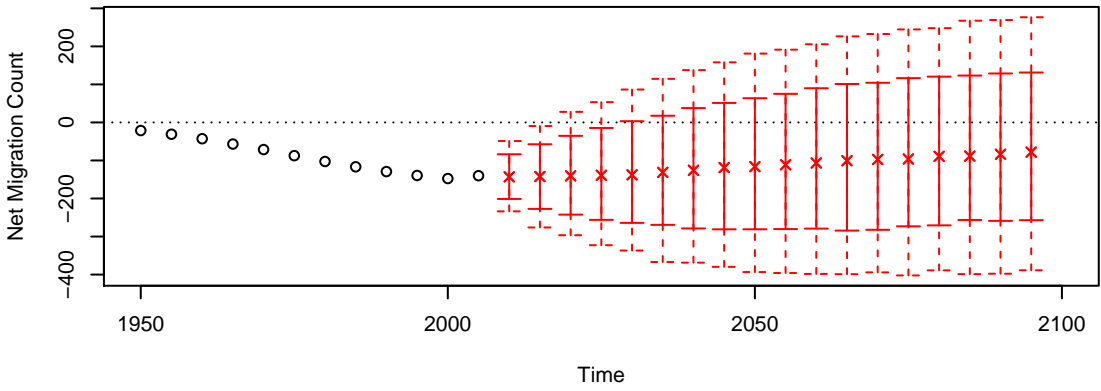

**Grenada Net Migrants (thousands)**

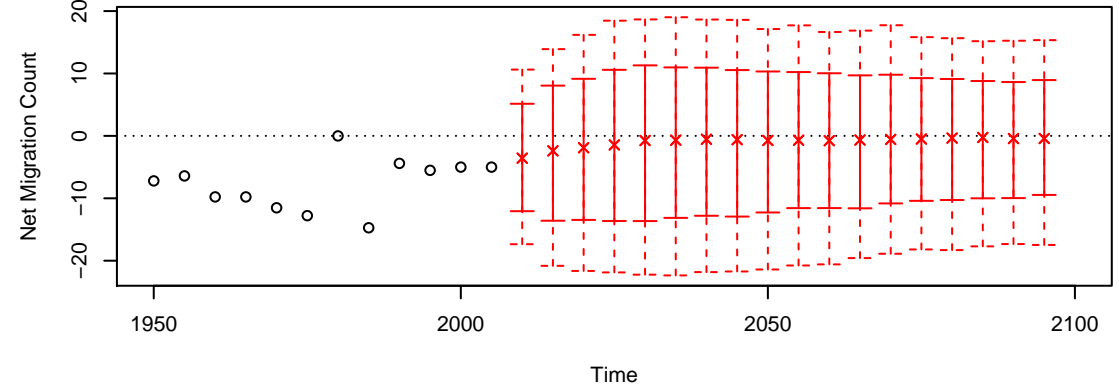

**Guadeloupe Net Migrants (thousands)**

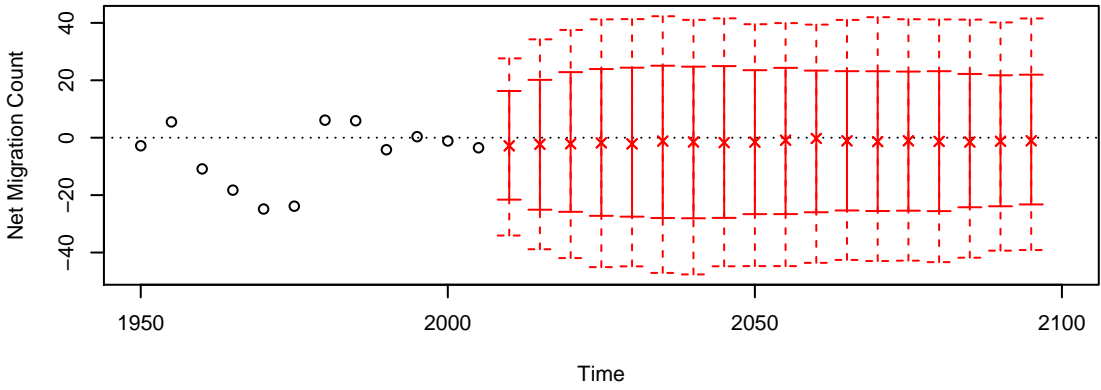

**Haiti Net Migrants (thousands)**

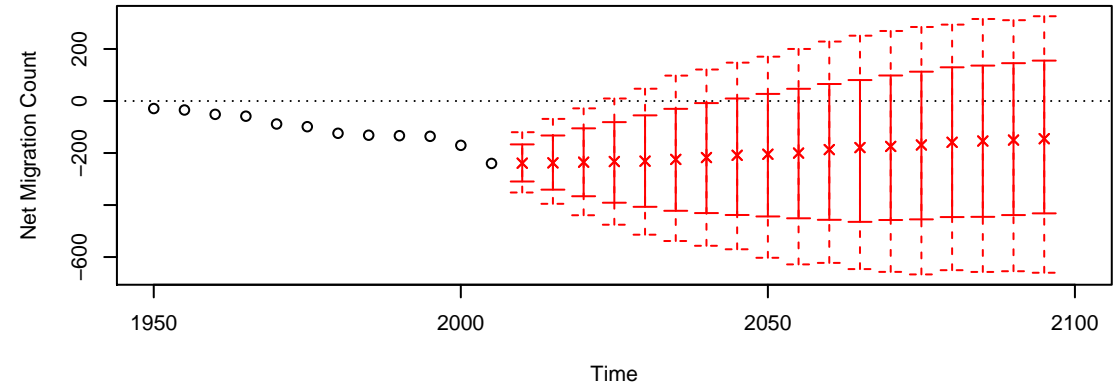

**Jamaica Net Migrants (thousands)**

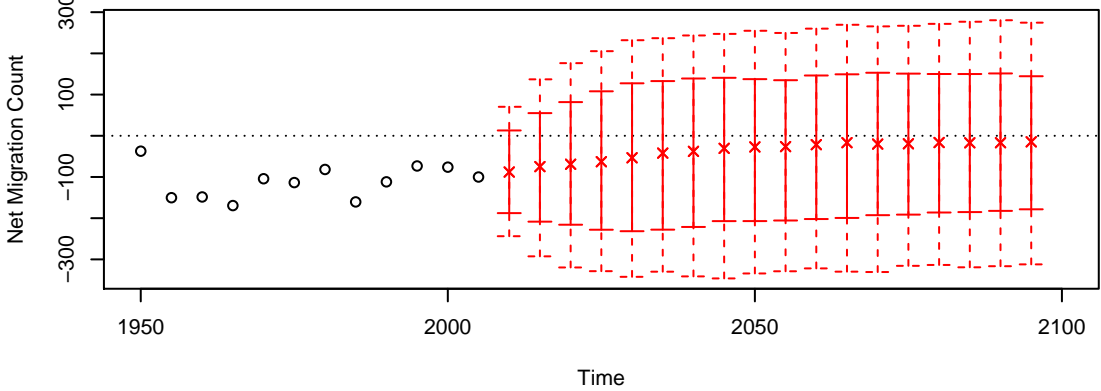

**Martinique Net Migrants (thousands)**

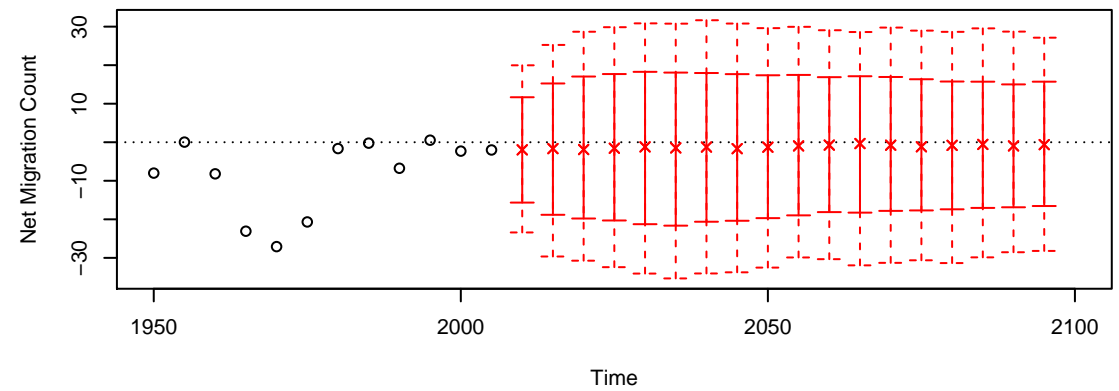

**Netherlands Antilles Net Migrants (thousands)**

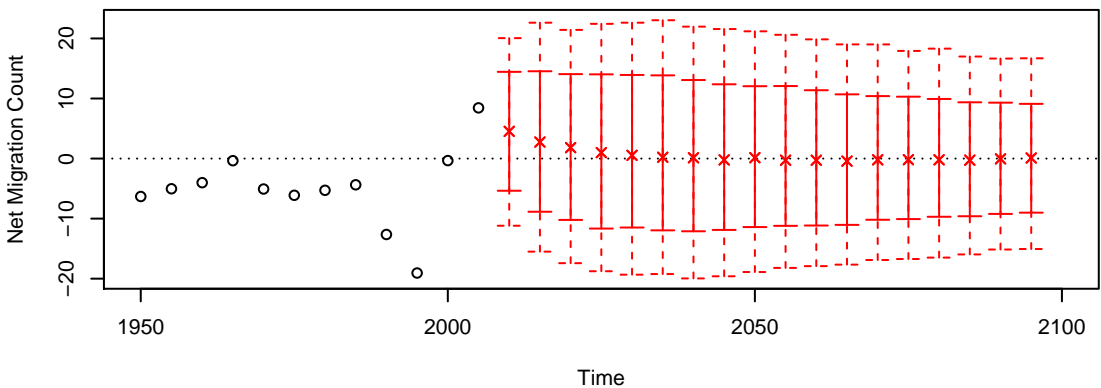

**Puerto Rico Net Migrants (thousands)**

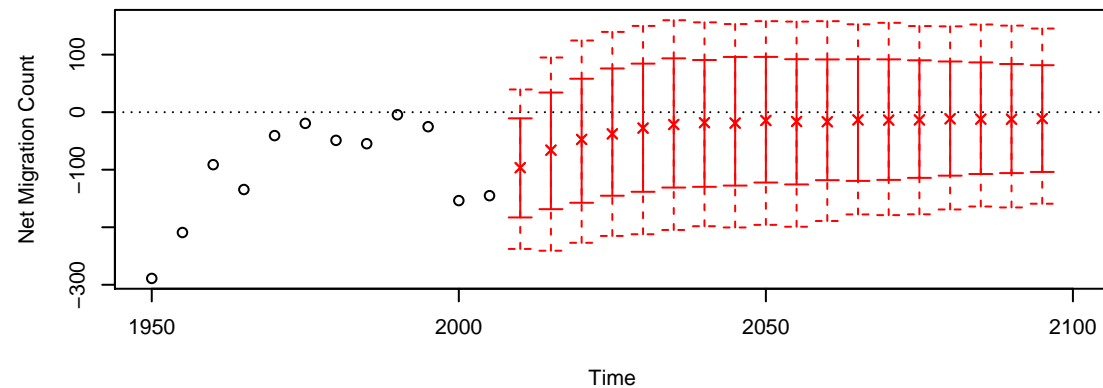

**Saint Lucia Net Migrants (thousands)**

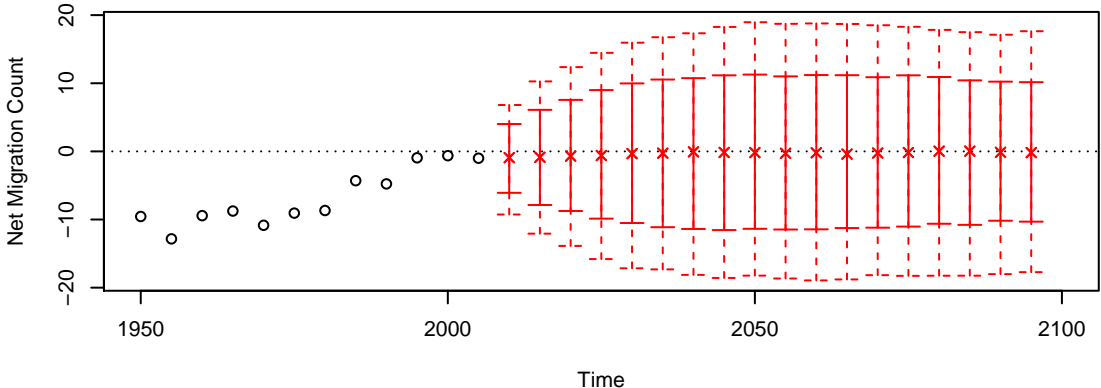

**Saint Vincent and the Grenadines Net Migrants (thousands)**

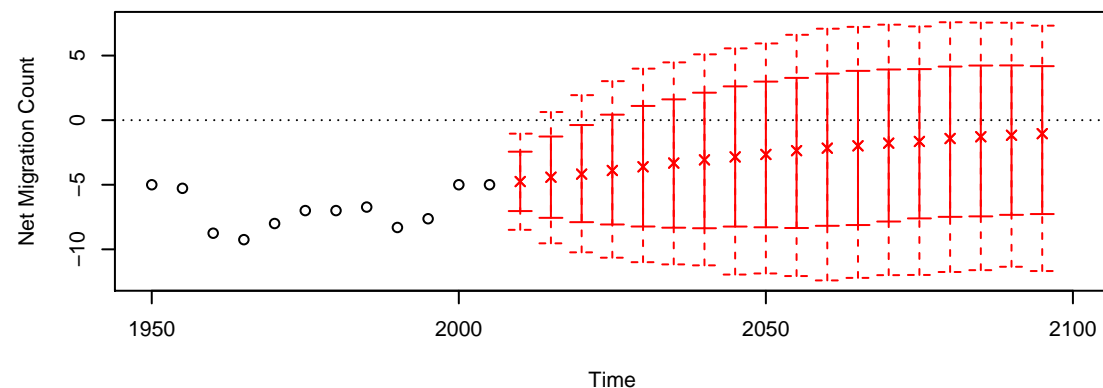

**Trinidad and Tobago Net Migrants (thousands)**

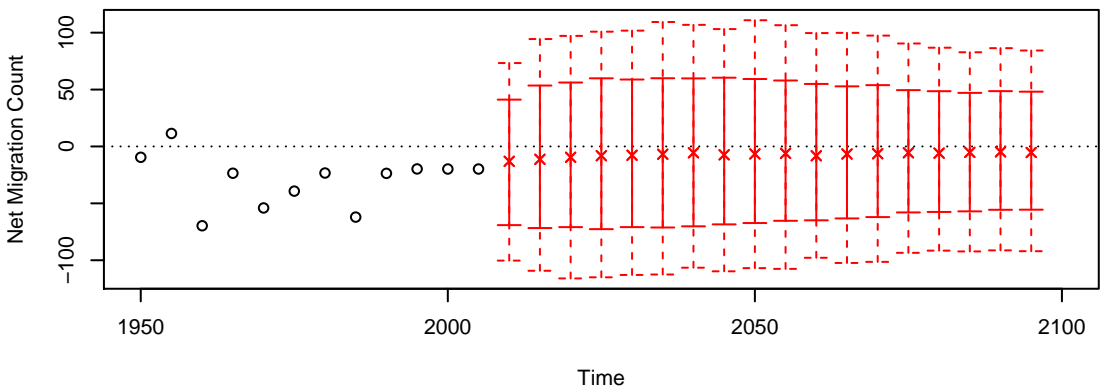

**United States Virgin Islands Net Migrants (thousands)**

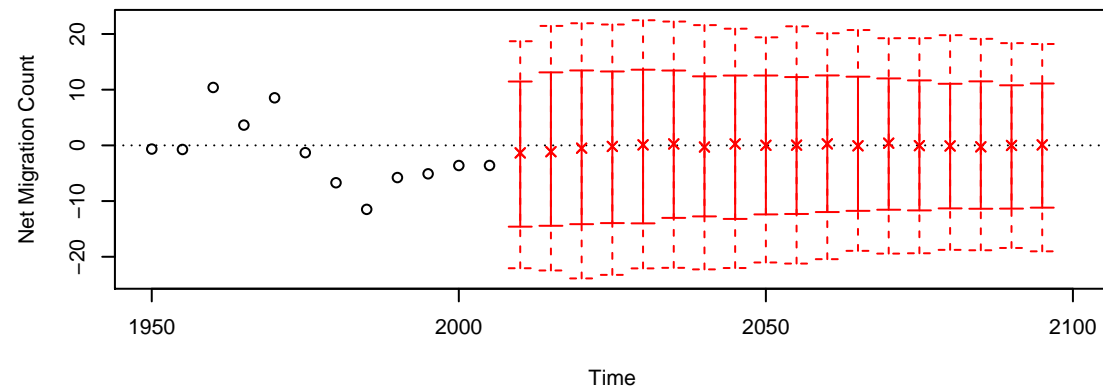

**Belize Net Migrants (thousands)**

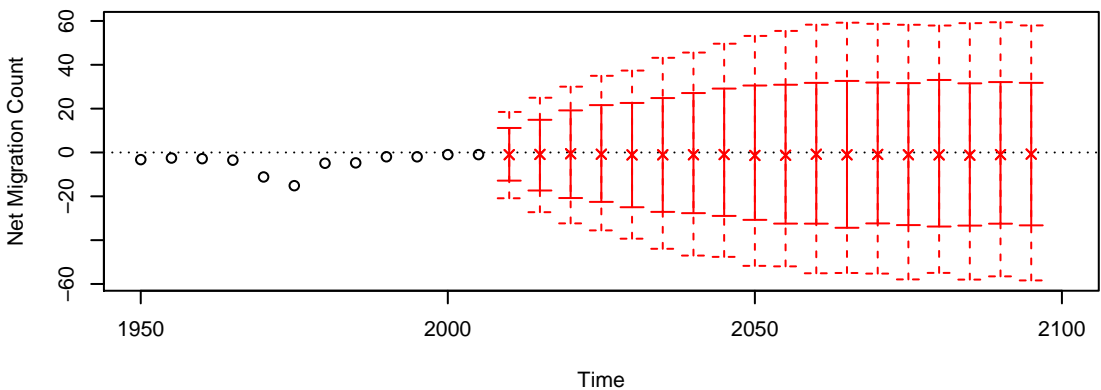

**Costa Rica Net Migrants (thousands)**

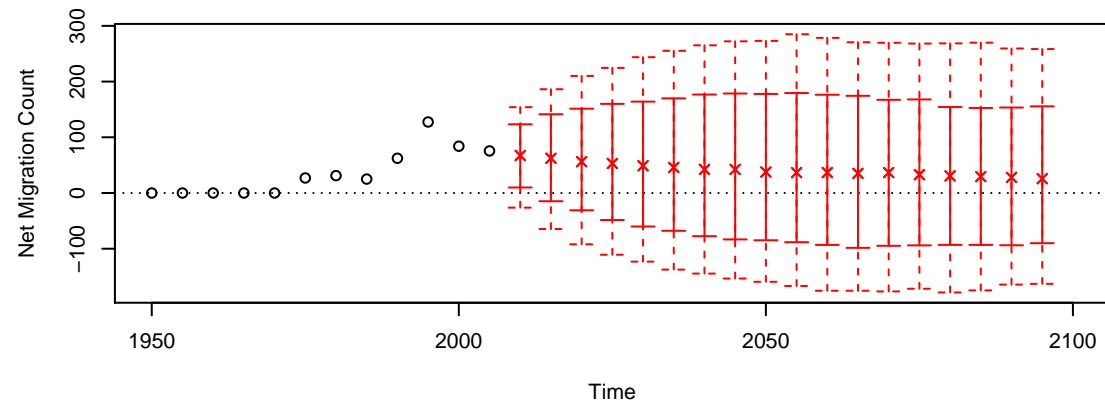

**El Salvador Net Migrants (thousands)**

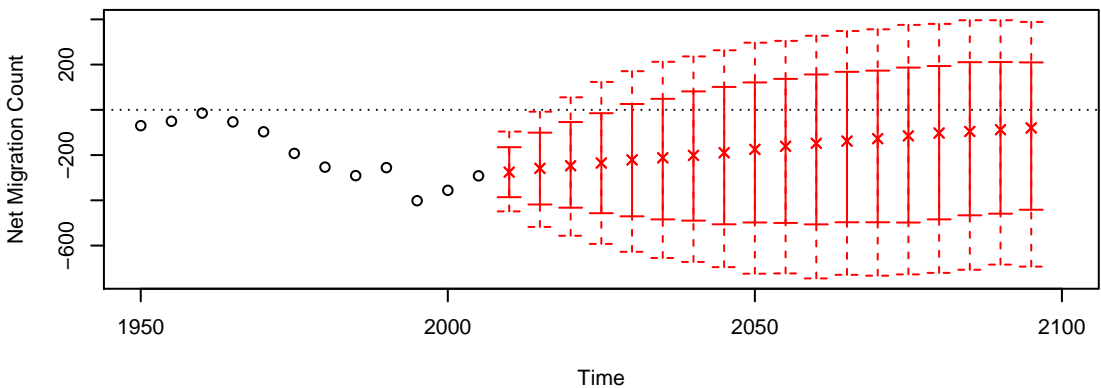

**Guatemala Net Migrants (thousands)**

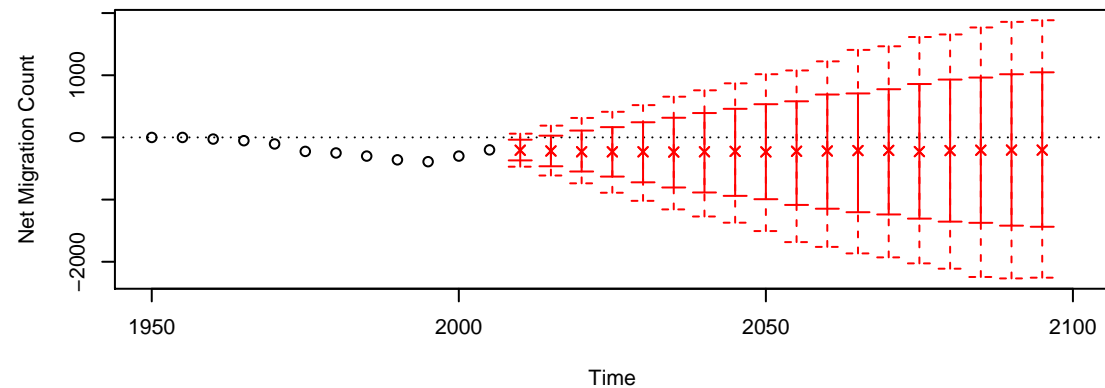

**Honduras Net Migrants (thousands)**

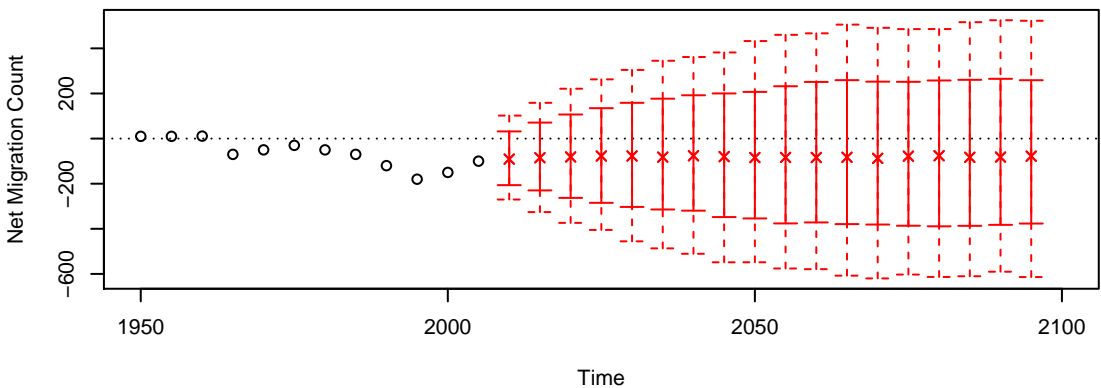

**Mexico Net Migrants (thousands)**

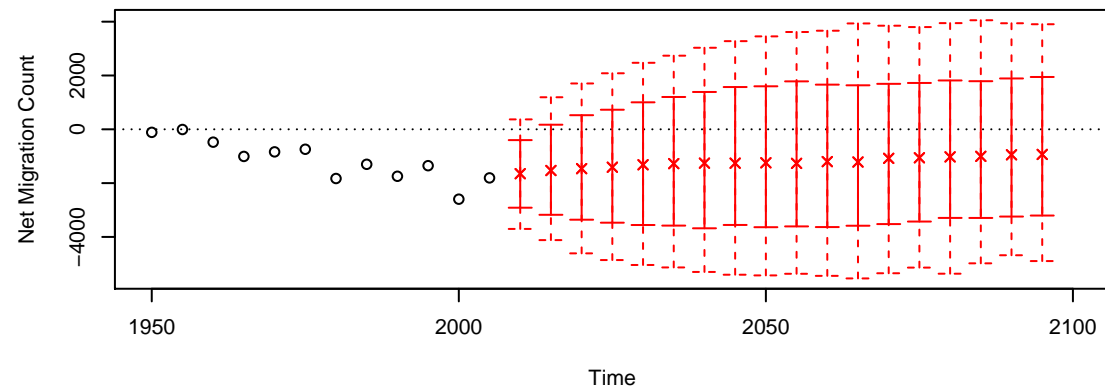

**Nicaragua Net Migrants (thousands)**

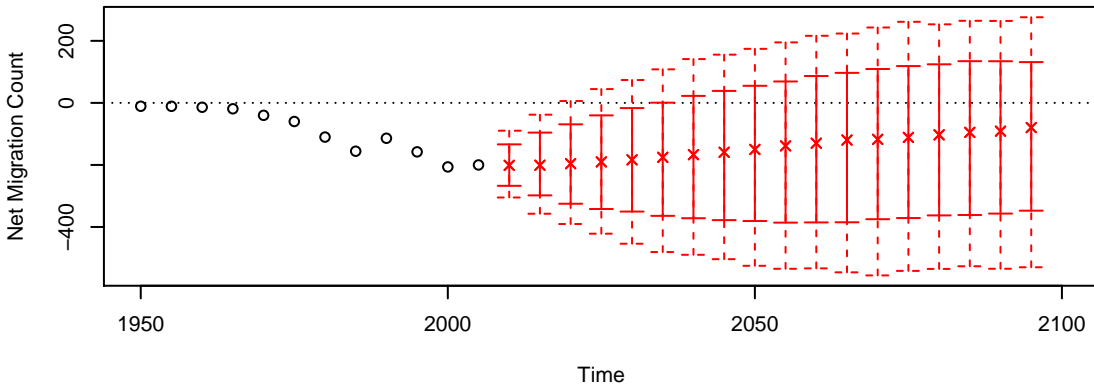

**Panama Net Migrants (thousands)**

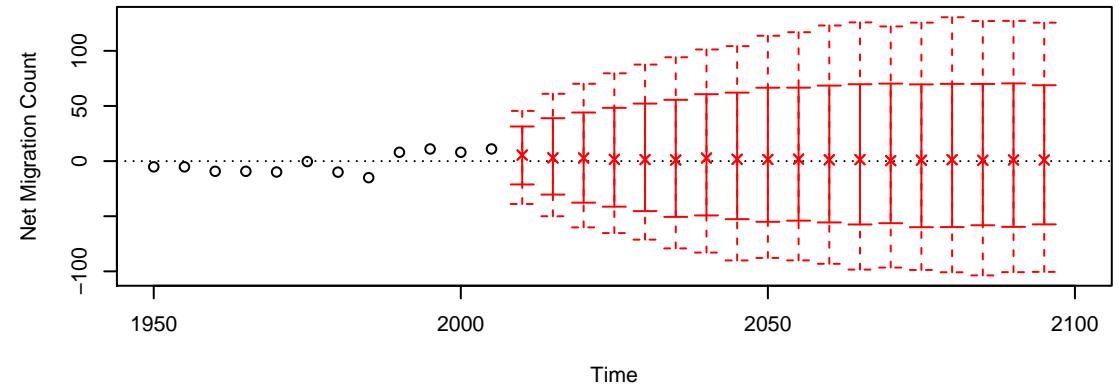

**Argentina Net Migrants (thousands)**

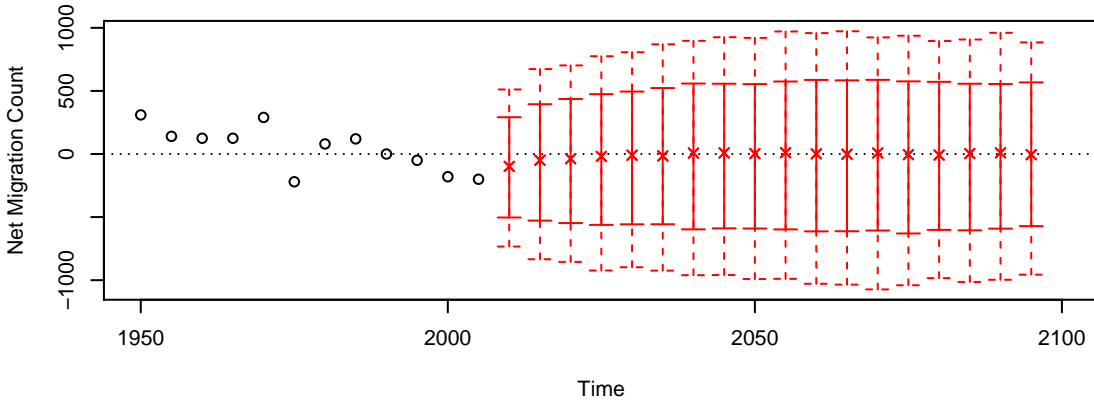

**Bolivia (Plurinational State of) Net Migrants (thousands)**

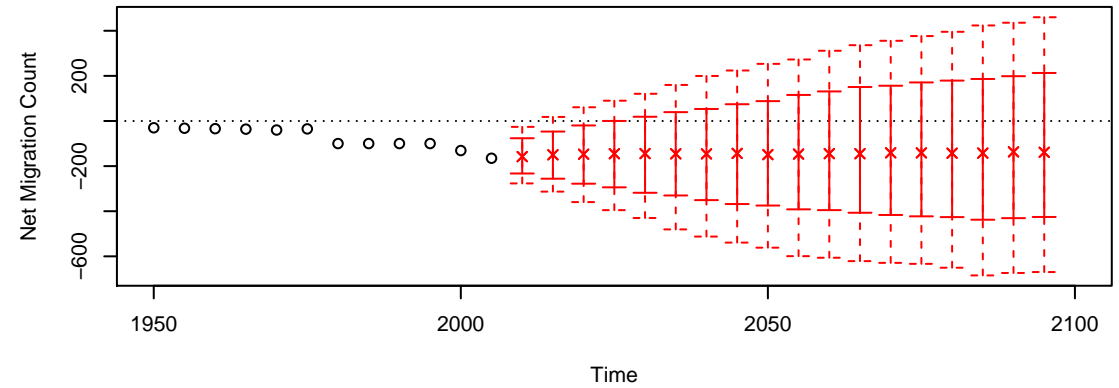

**Brazil Net Migrants (thousands)**

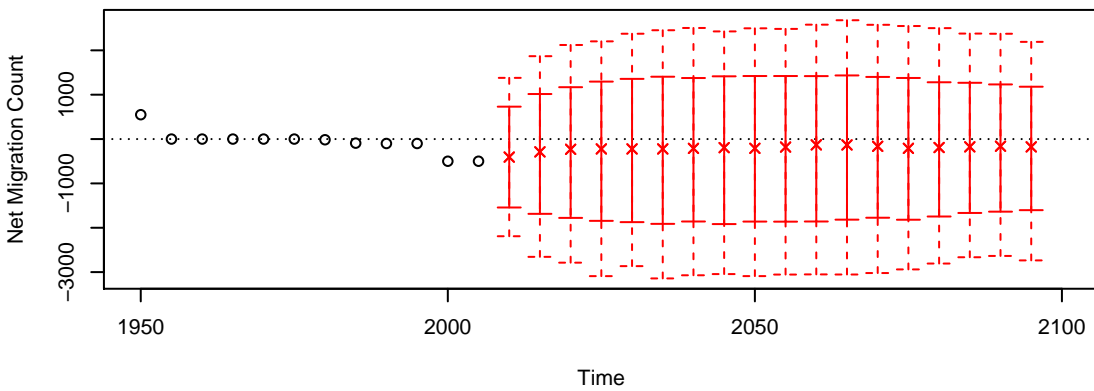

**Chile Net Migrants (thousands)**

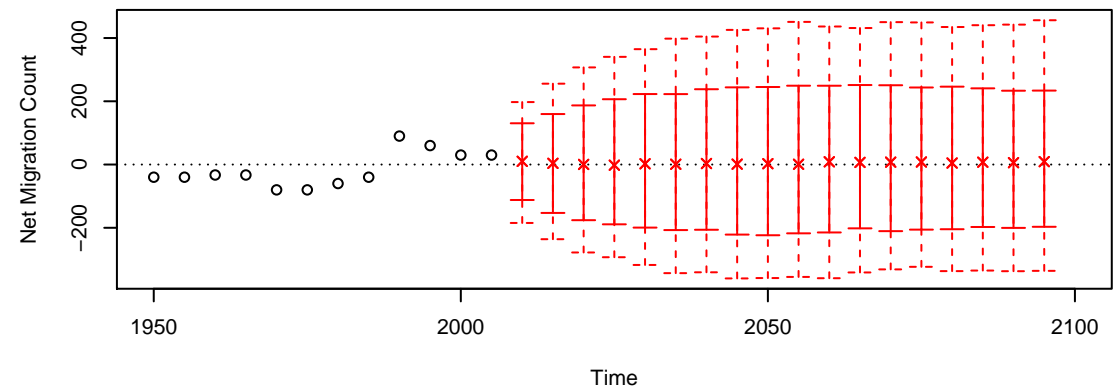

**Colombia Net Migrants (thousands)**

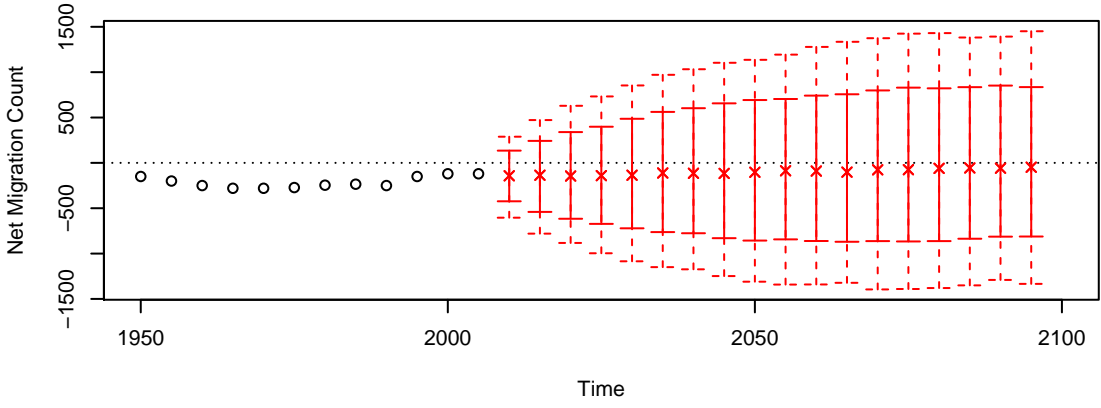

**Ecuador Net Migrants (thousands)**

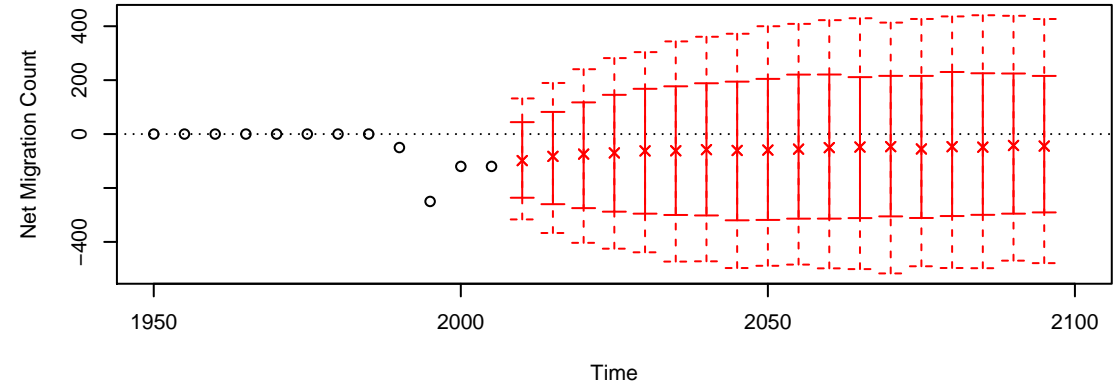

**French Guiana Net Migrants (thousands)**

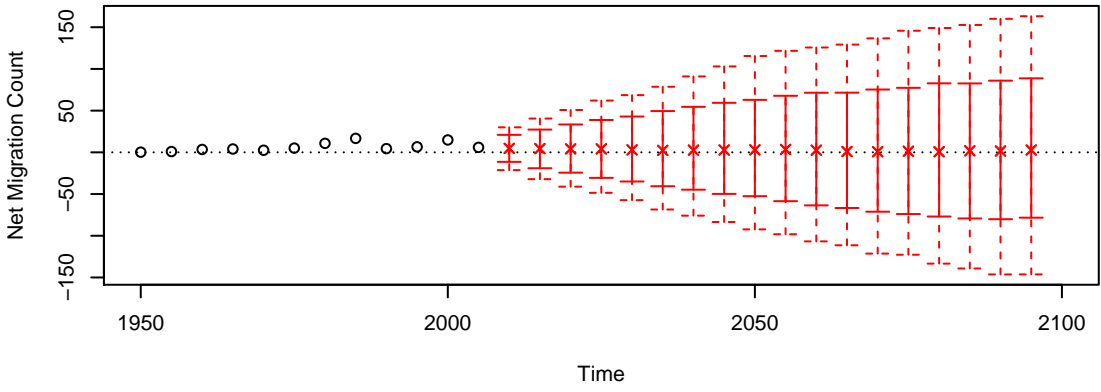

**Guyana Net Migrants (thousands)**

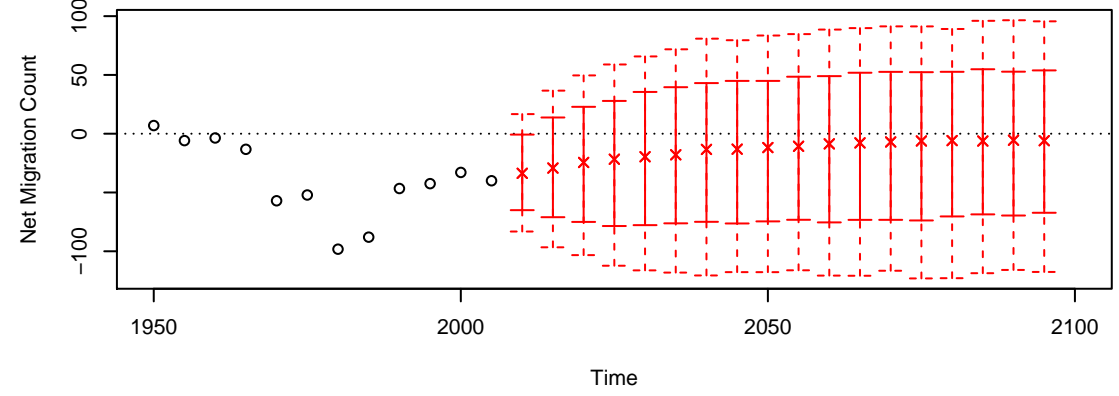

**Paraguay Net Migrants (thousands)**

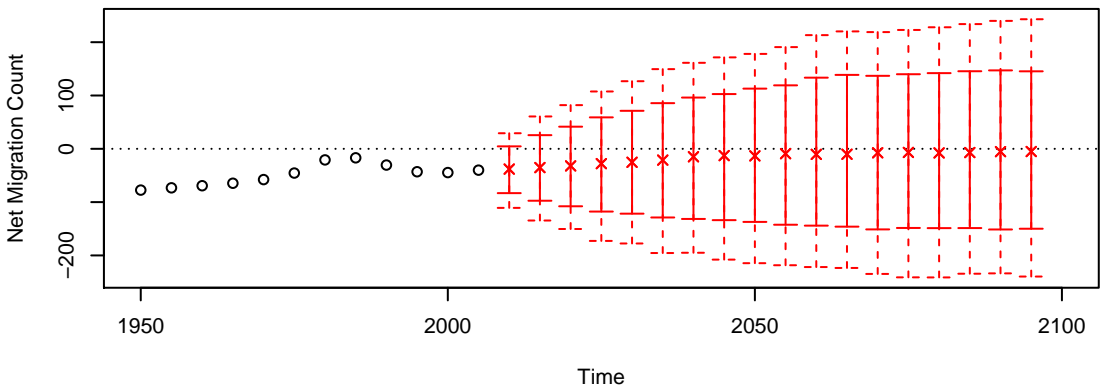

**Peru Net Migrants (thousands)**

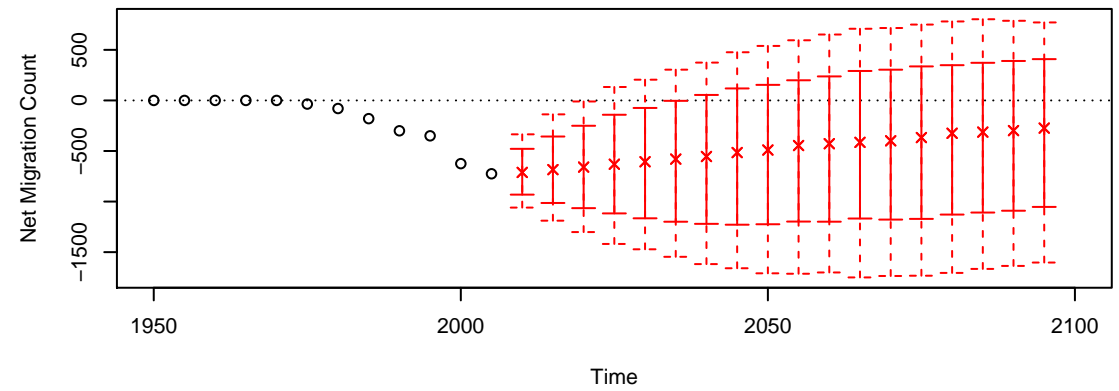

**Suriname Net Migrants (thousands)**

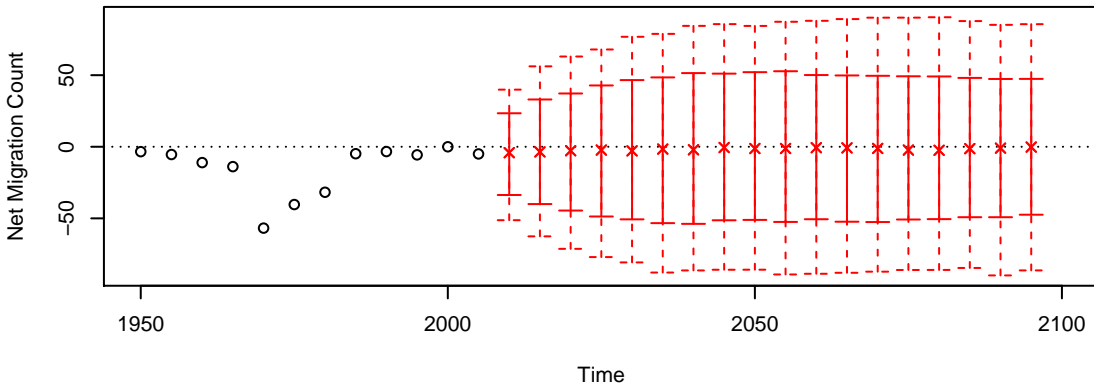

**Uruguay Net Migrants (thousands)**

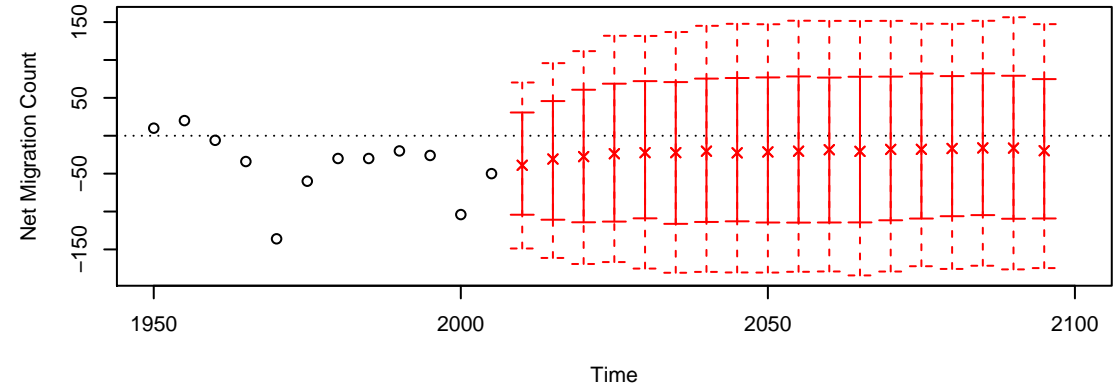

**Venezuela (Bolivarian Republic of) Net Migrants (thousands)**

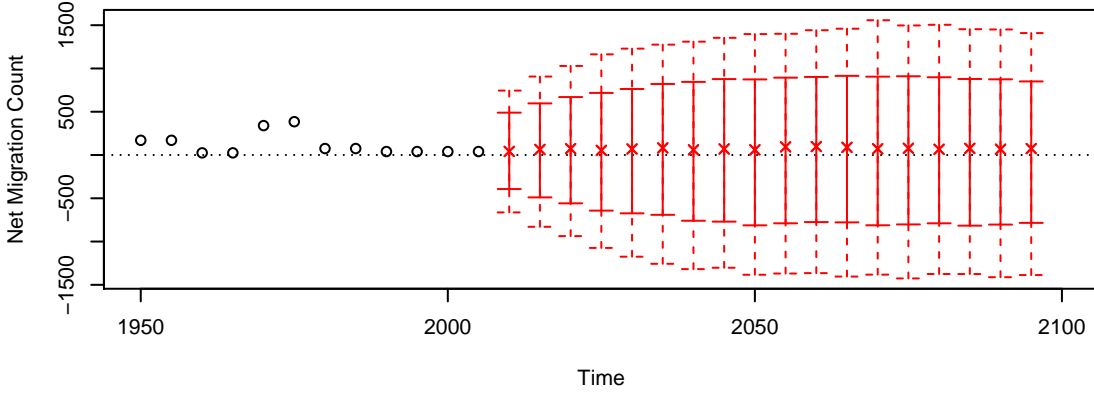

**Canada Net Migrants (thousands)**

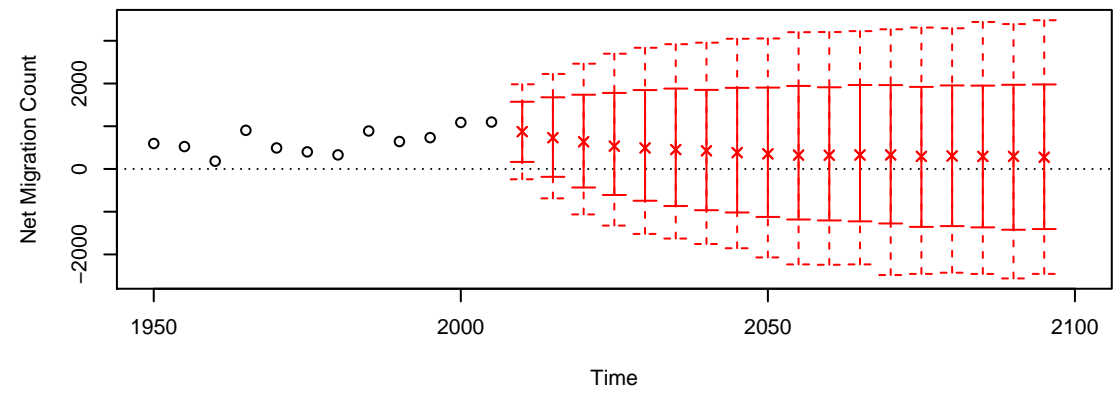

**United States of America Net Migrants (thousands)**

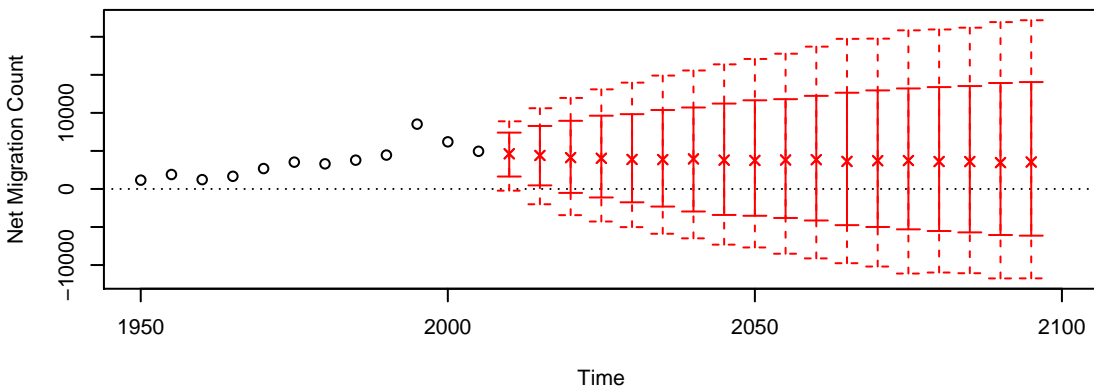

**Australia Net Migrants (thousands)**

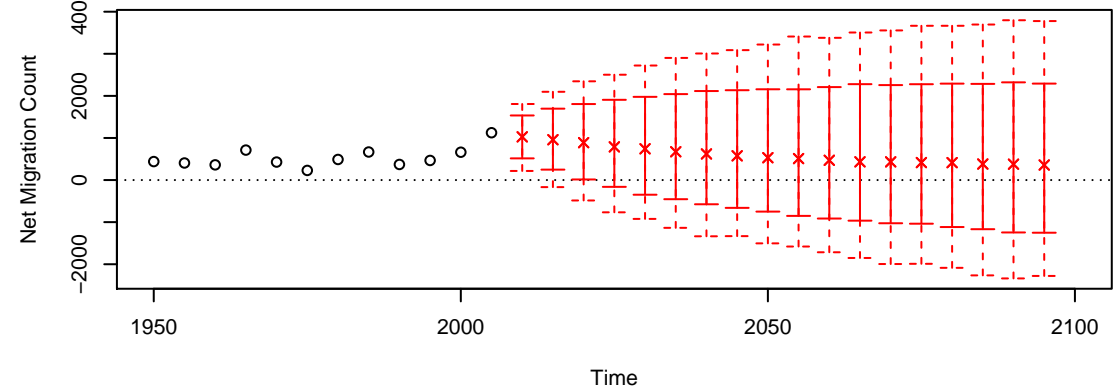

**New Zealand Net Migrants (thousands)**

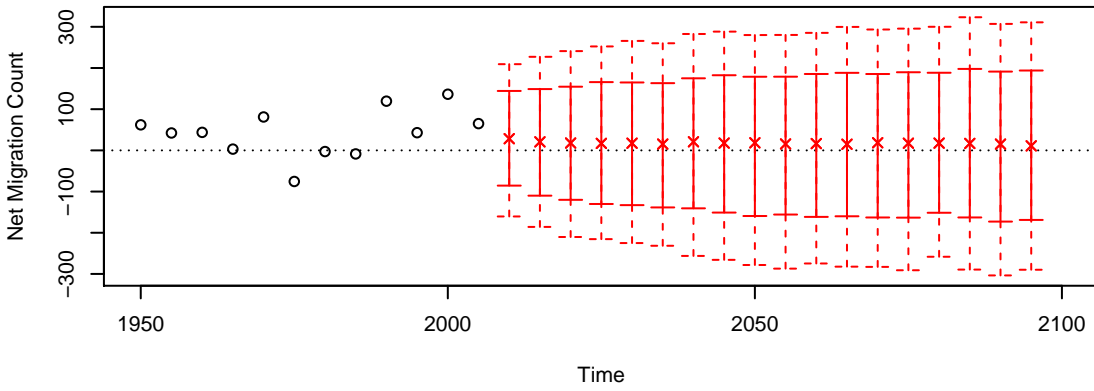

**Fiji Net Migrants (thousands)**

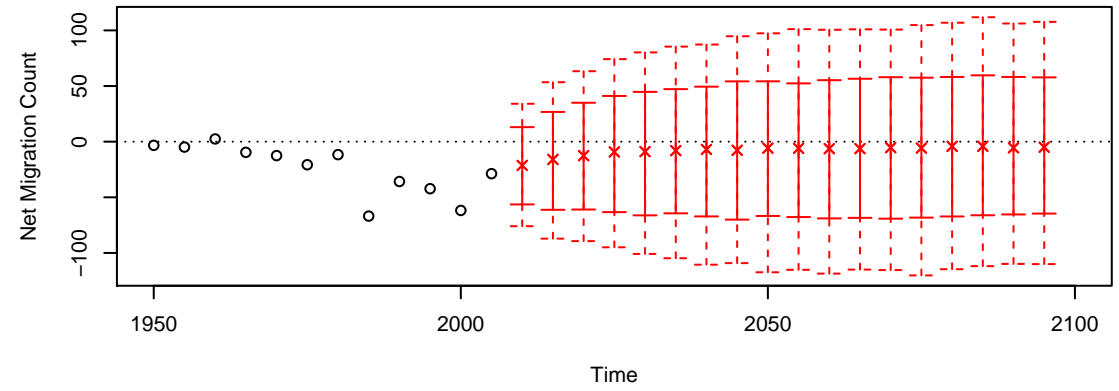

**New Caledonia Net Migrants (thousands)**

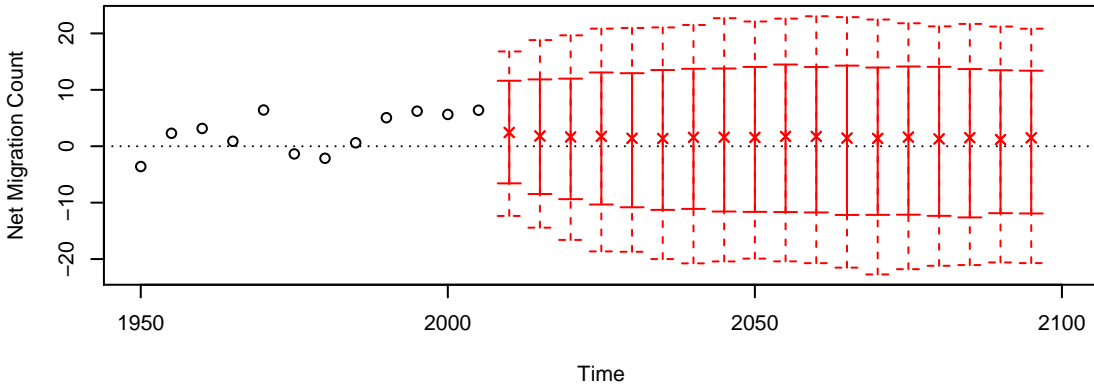

**Papua New Guinea Net Migrants (thousands)**

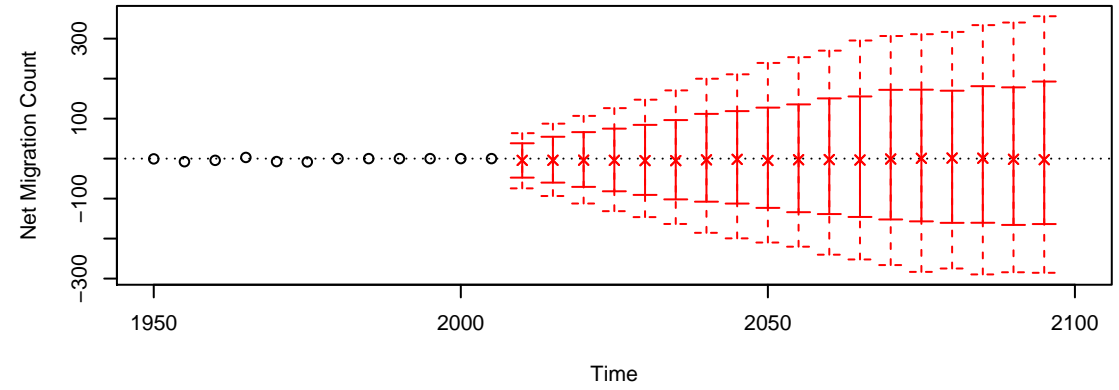

**Solomon Islands Net Migrants (thousands)**

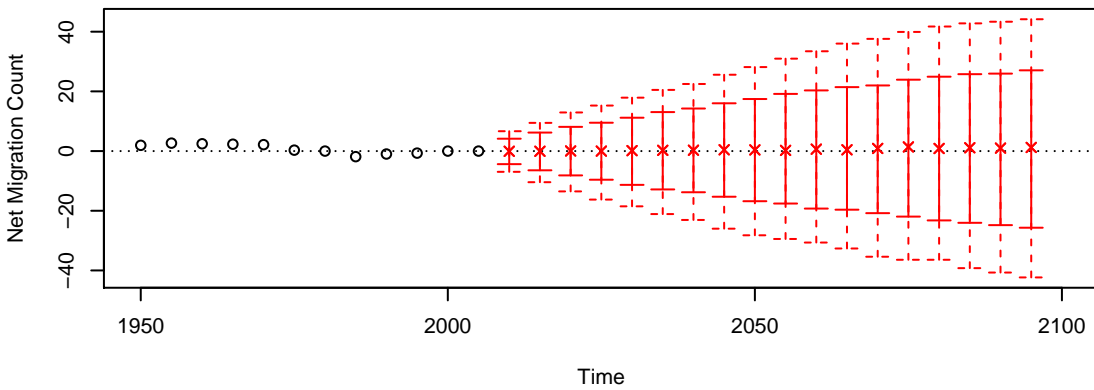

**Vanuatu Net Migrants (thousands)**

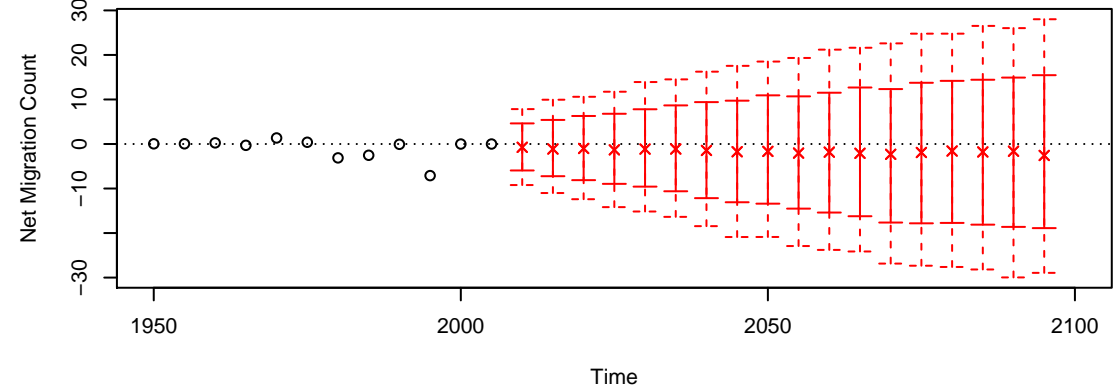



**Guam Net Migrants (thousands)**

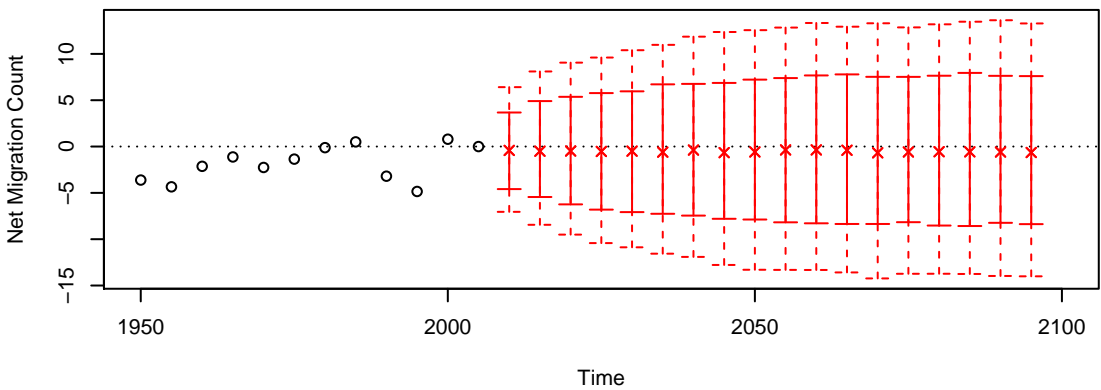

**Micronesia (Fed. States of) Net Migrants (thousands)**

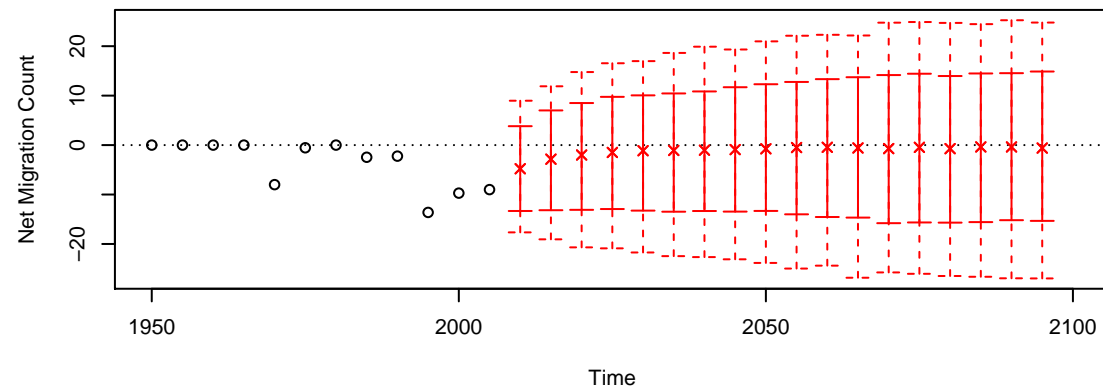

**French Polynesia Net Migrants (thousands)**

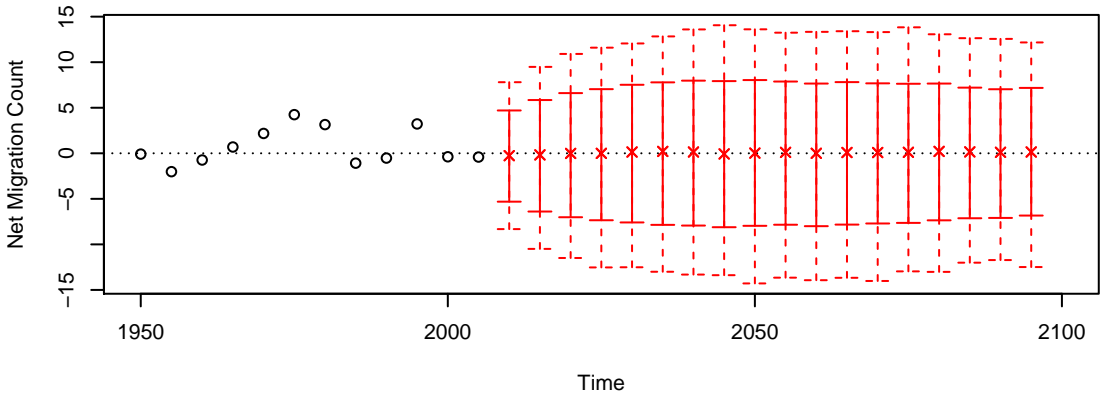

**Samoa Net Migrants (thousands)**

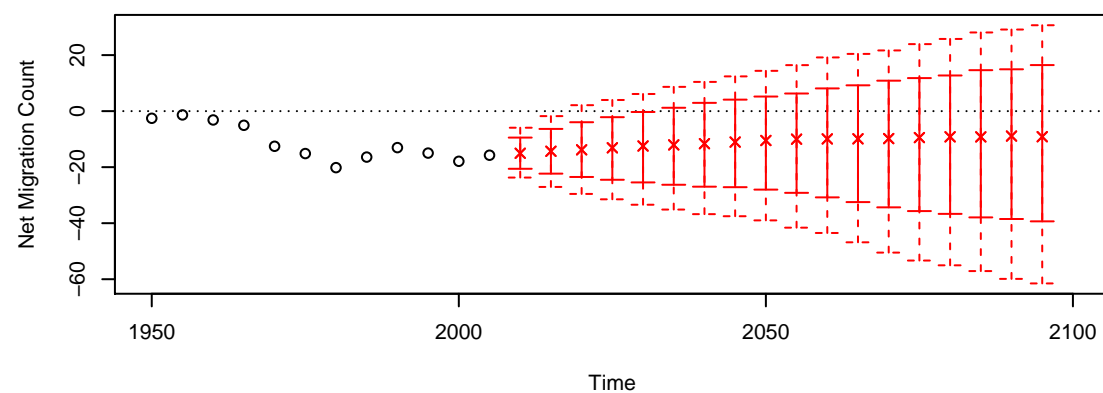

**Tonga Net Migrants (thousands)**

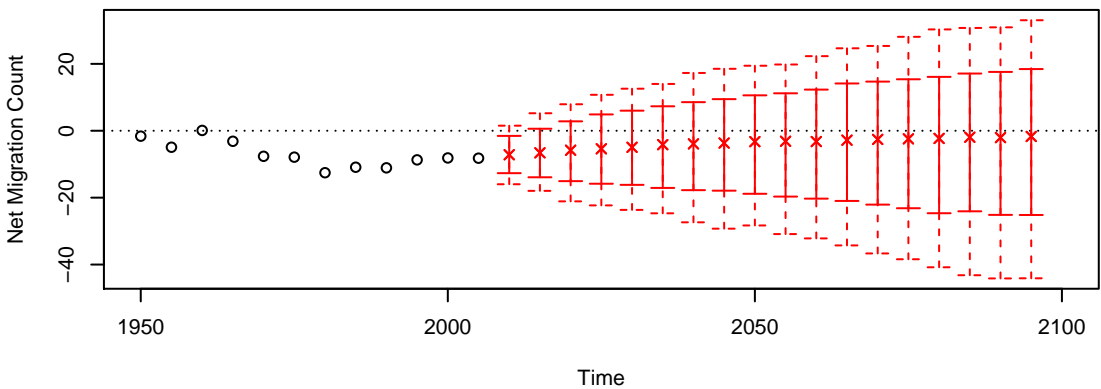

Supplement: 13524_2015_415_MOESM1_ESM.pdf [file 13524_2015_415_MOESM1_ESM.pdf]
