# Supplementary material for: Bayesian Probabilistic Projection of International Migration
Source: PubMed Central journal article supplement (PMC4605963; doi:10.1007/s13524-015-0415-0), 2015-09-10

**Burundi Rates**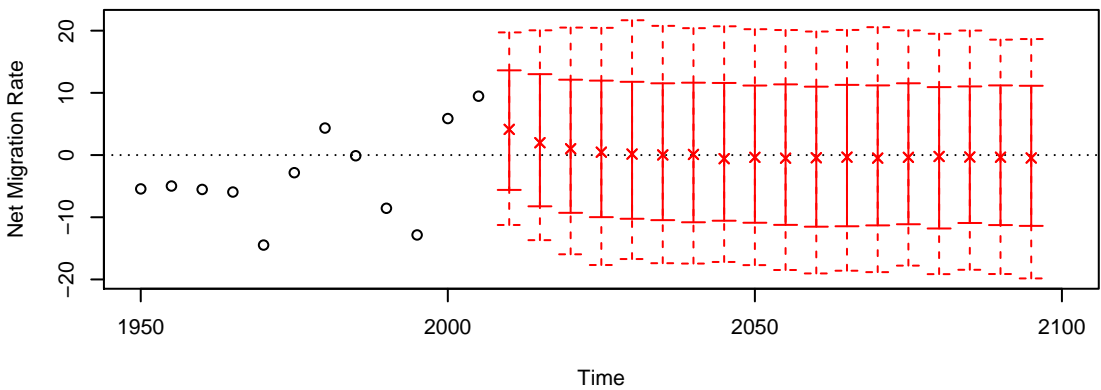**Comoros Rates**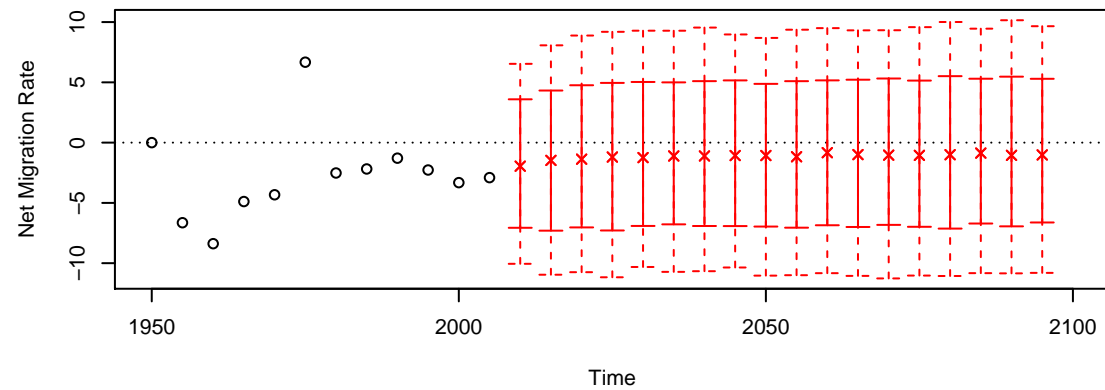**Djibouti Rates**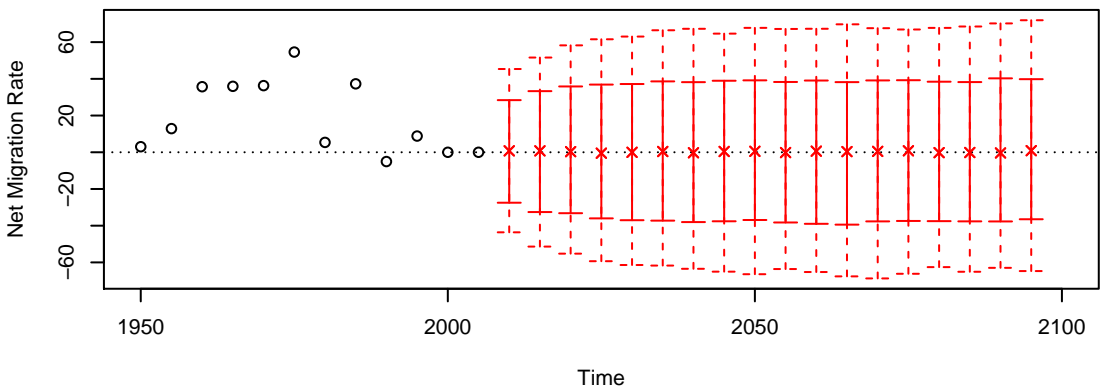**Eritrea Rates**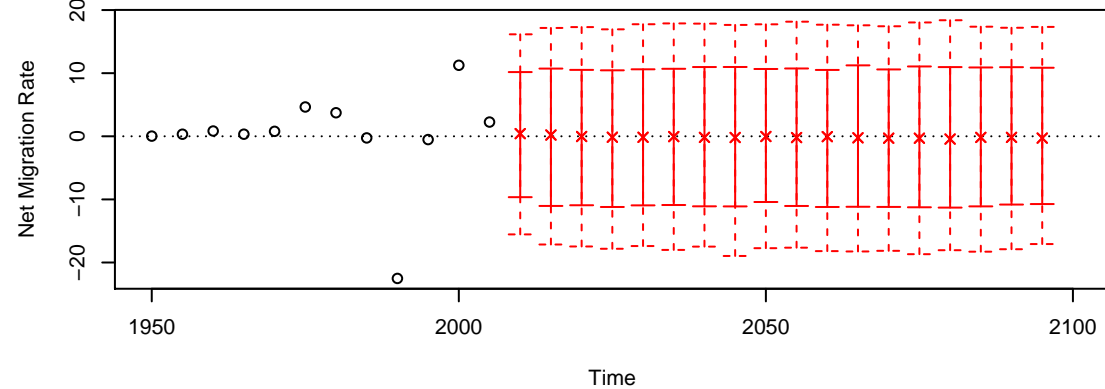**Ethiopia Rates**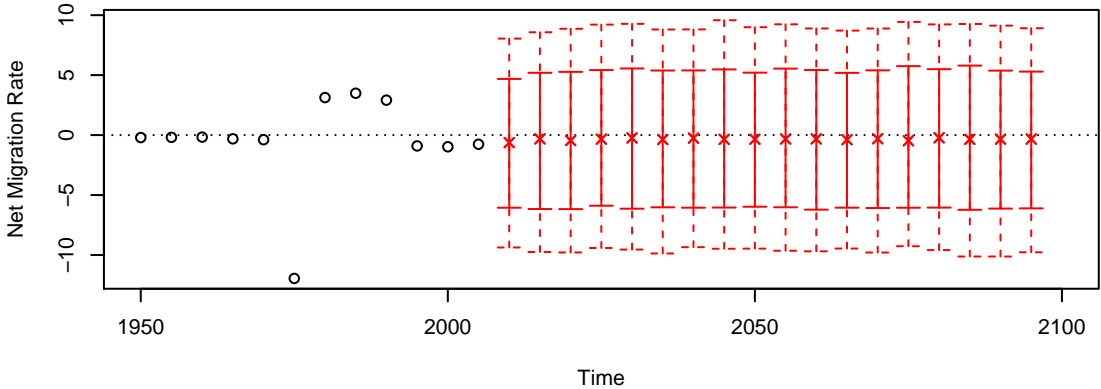**Kenya Rates**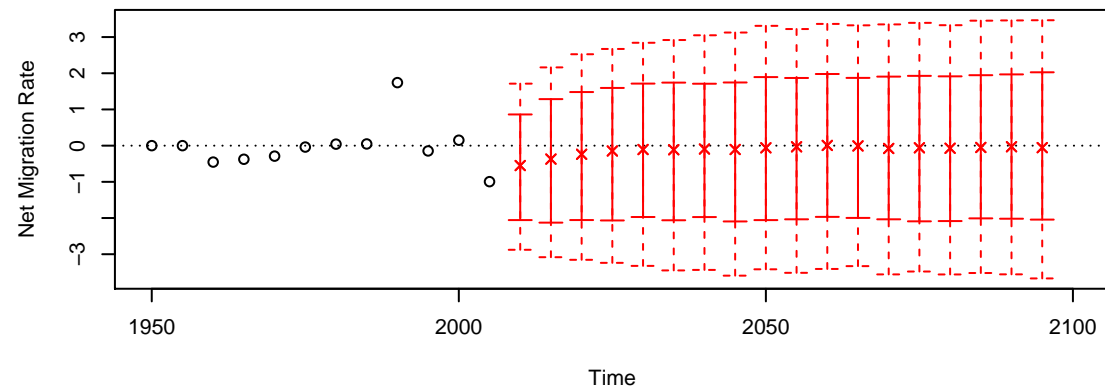

**Madagascar Rates**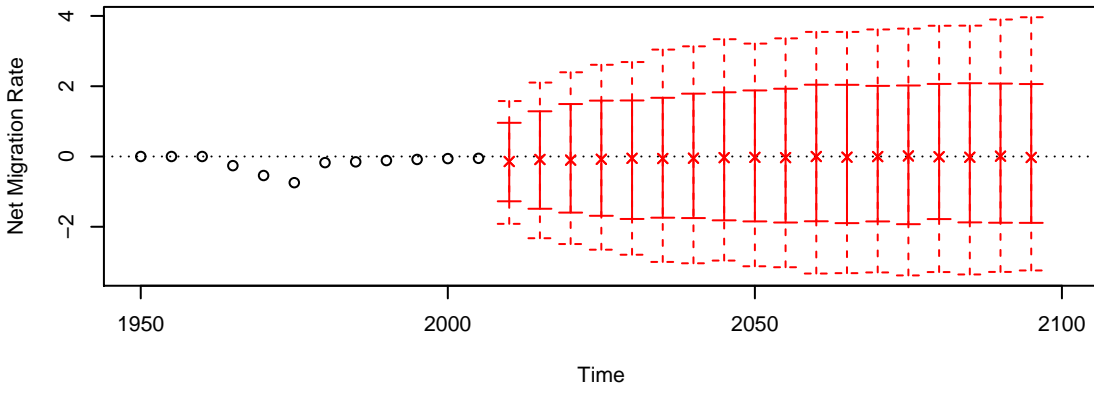**Malawi Rates**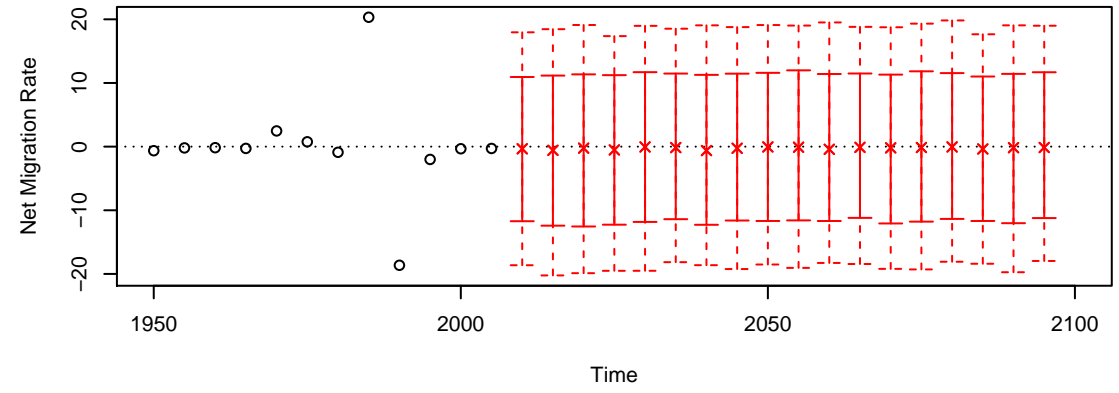**Mauritius Rates**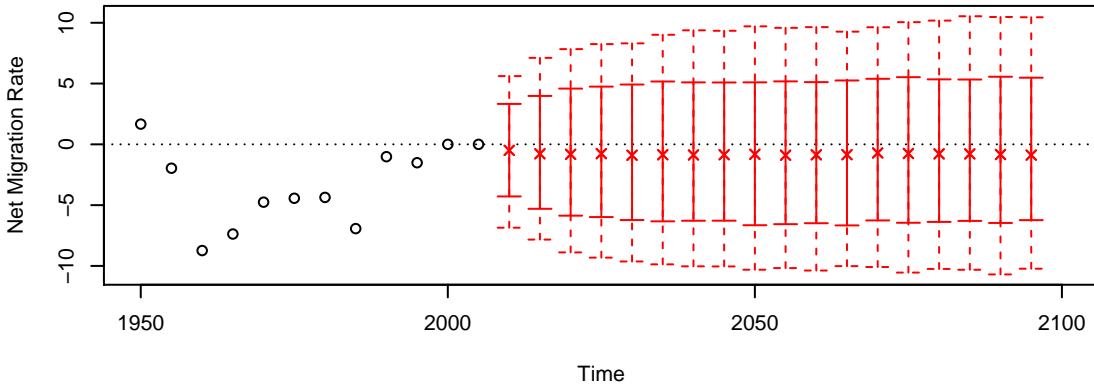**Mayotte Rates**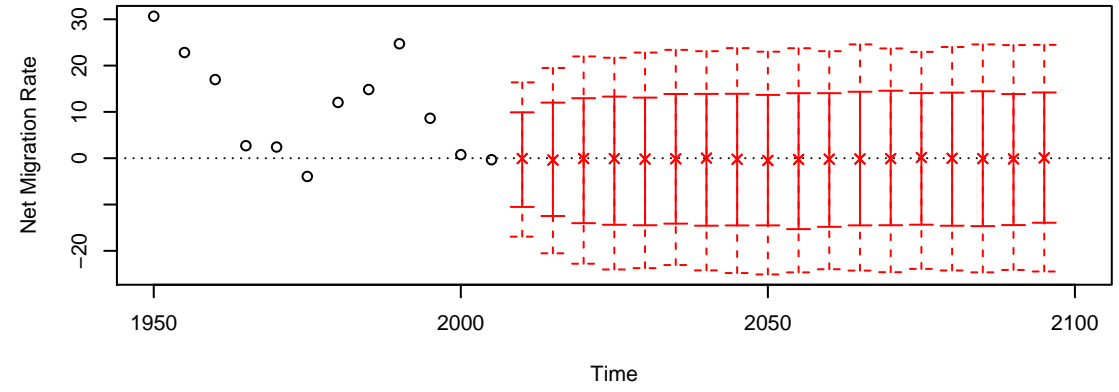**Mozambique Rates**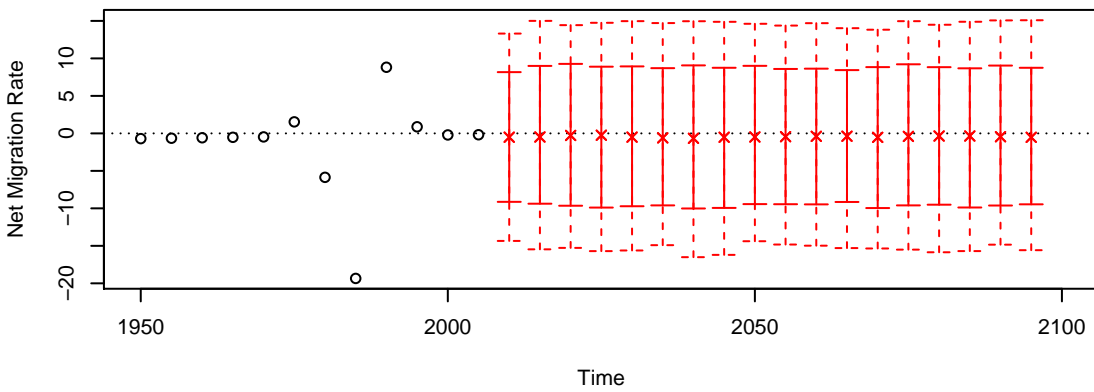**Réunion Rates**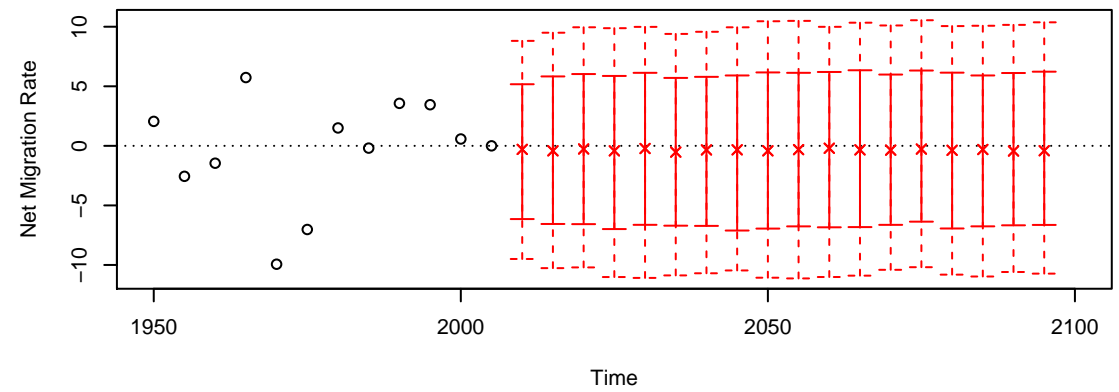

**Rwanda Rates**

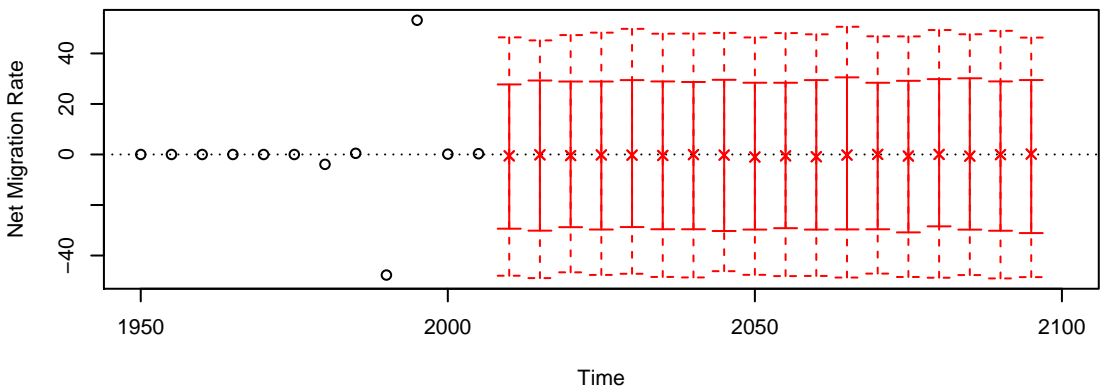

**Somalia Rates**

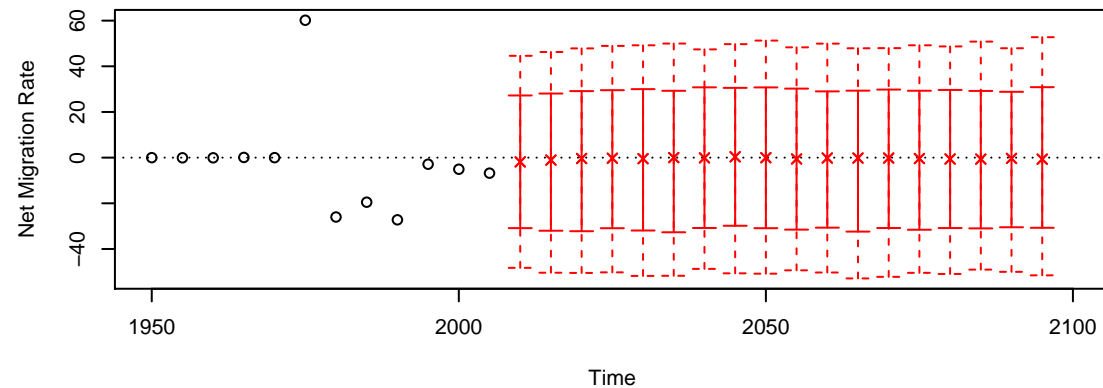

**Uganda Rates**

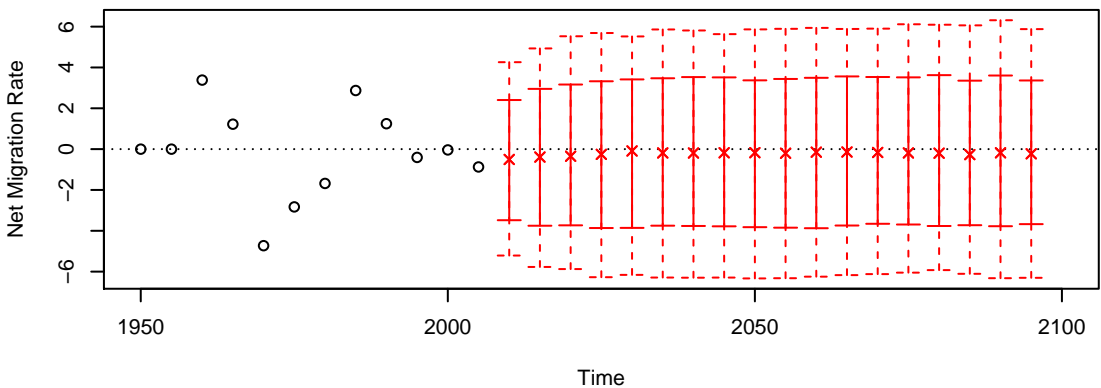

**United Republic of Tanzania Rates**

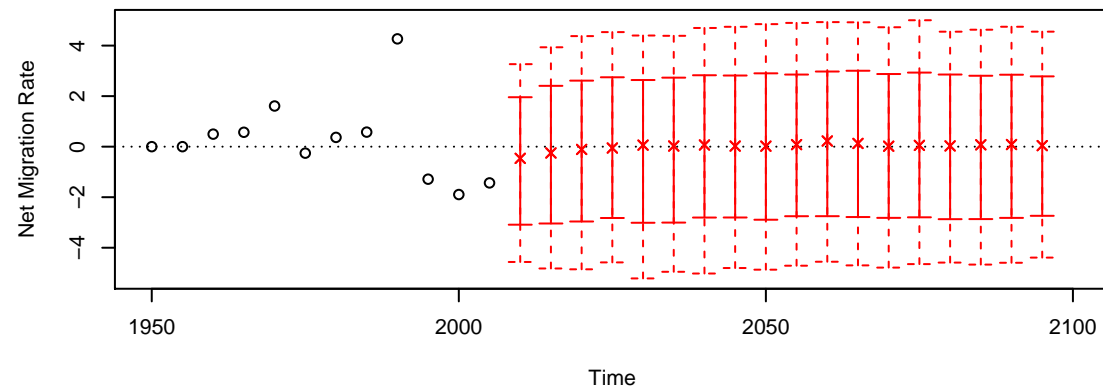

**Zambia Rates**

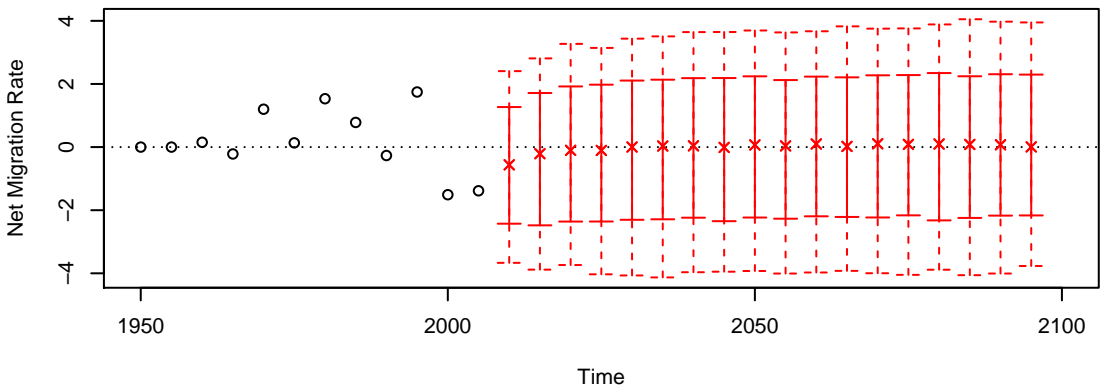

**Zimbabwe Rates**

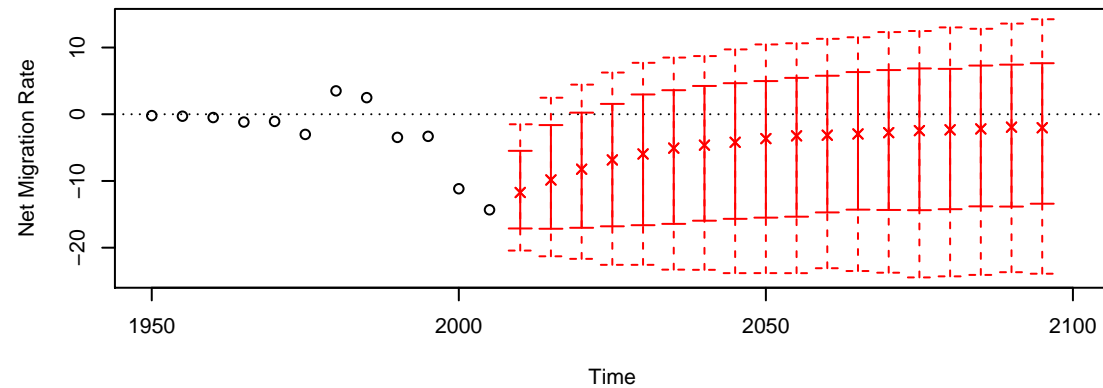

**Angola Rates**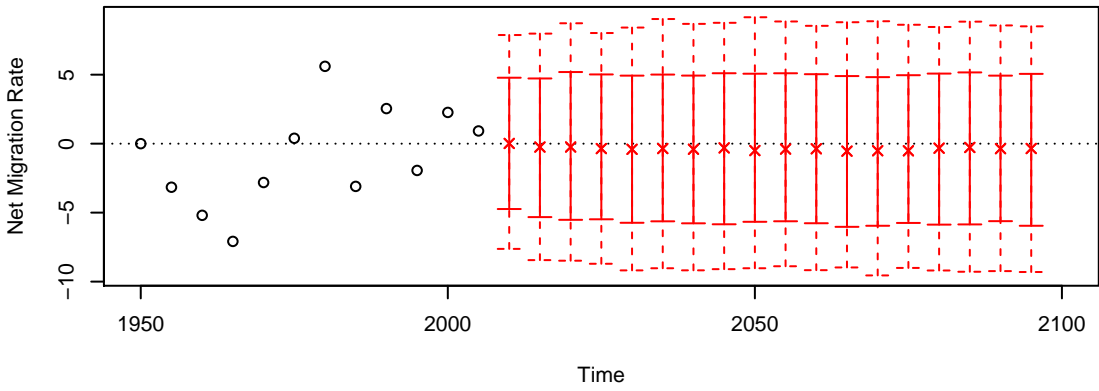**Cameroon Rates**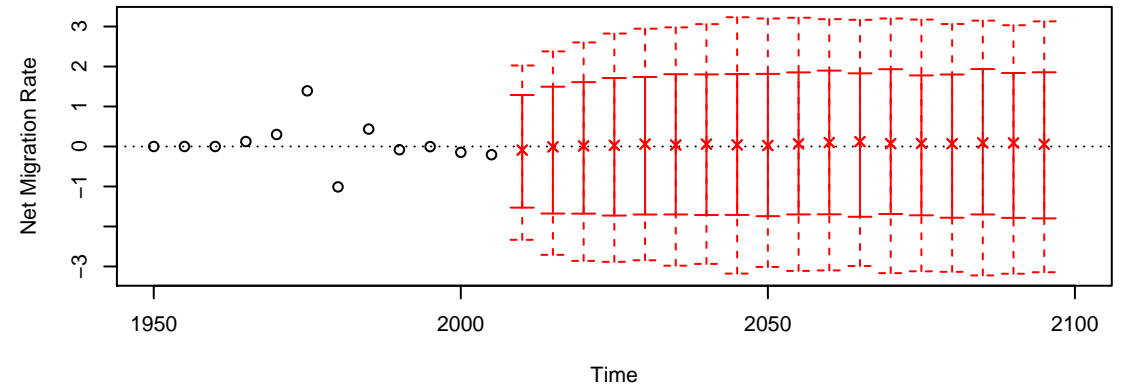**Central African Republic Rates**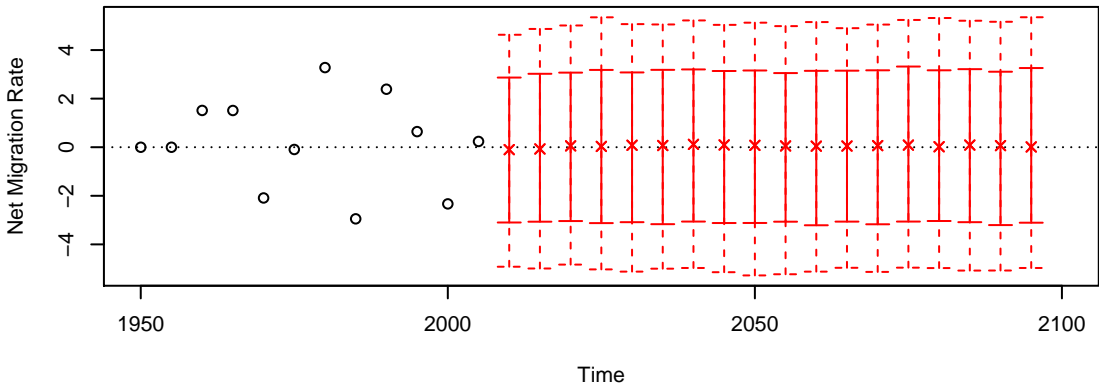**Chad Rates**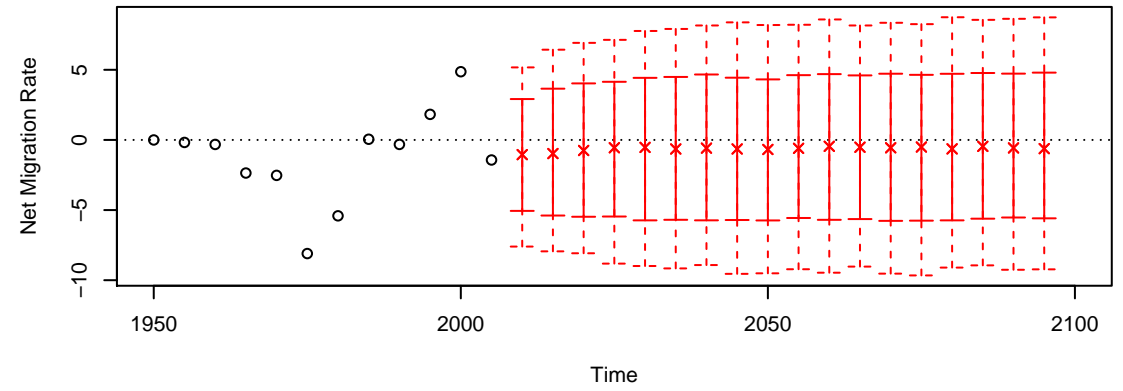**Congo Rates**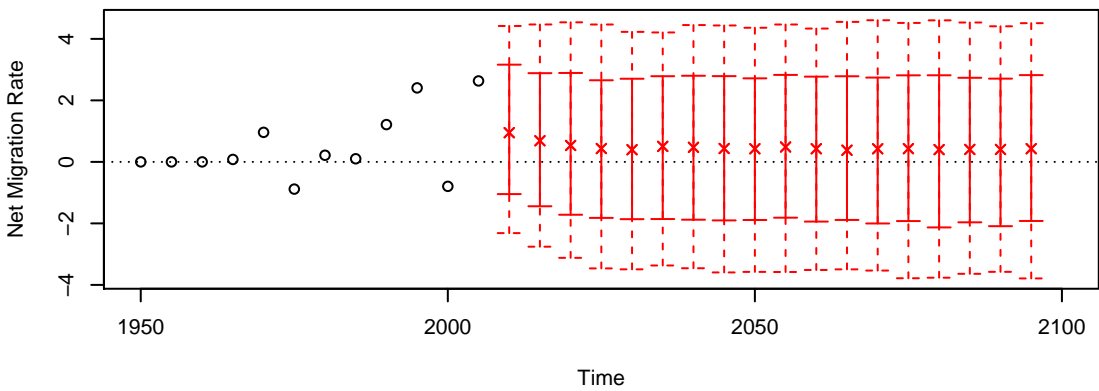**Democratic Republic of the Congo Rates**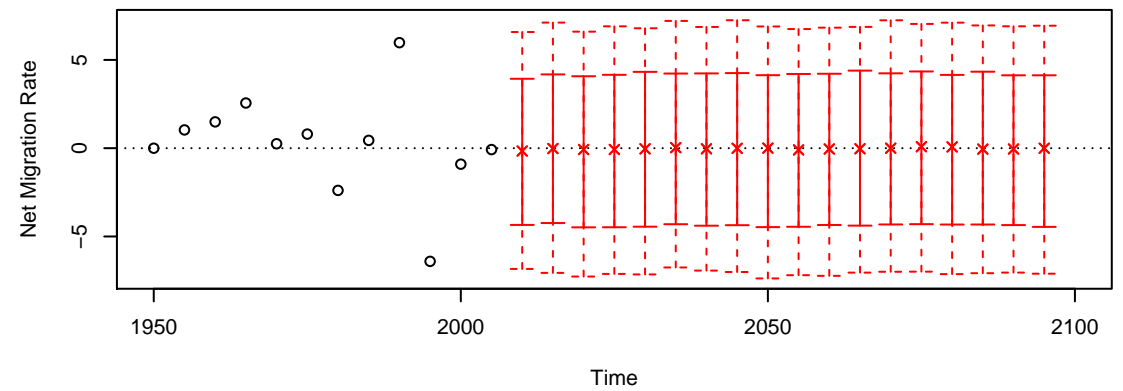

**Equatorial Guinea Rates**

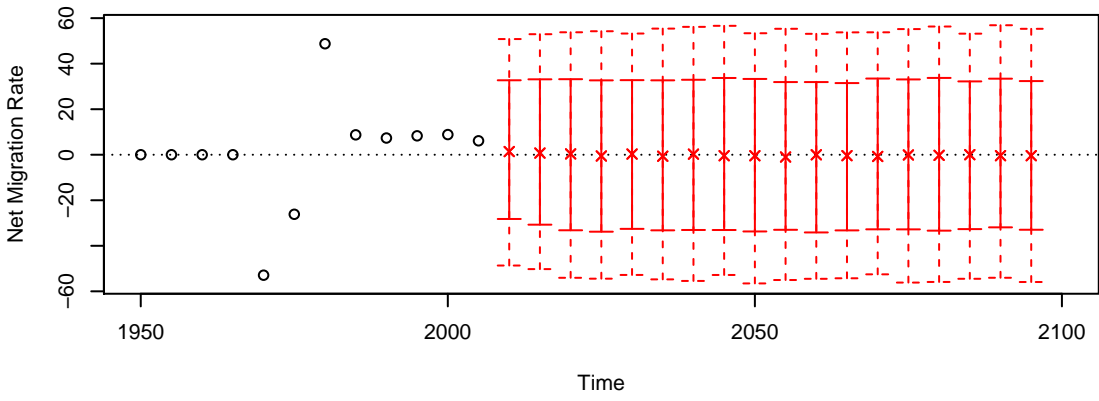

**Gabon Rates**

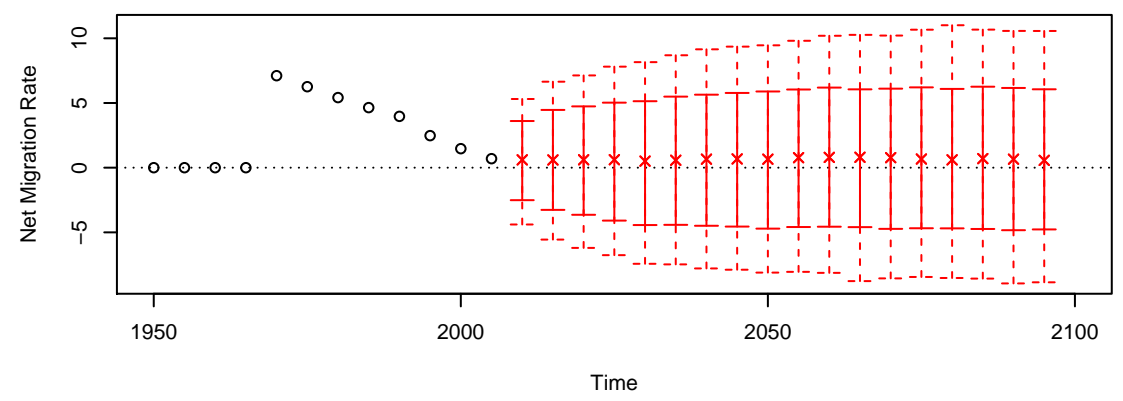

**Sao Tome and Principe Rates**

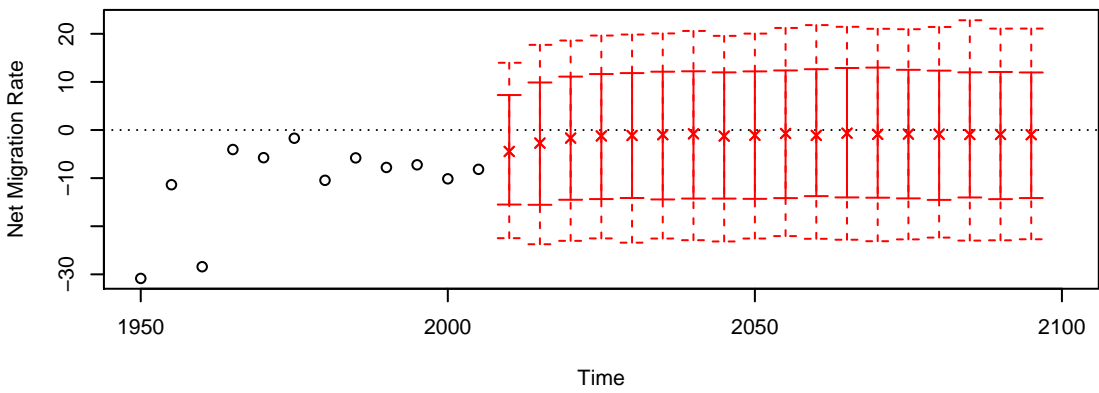

**Algeria Rates**

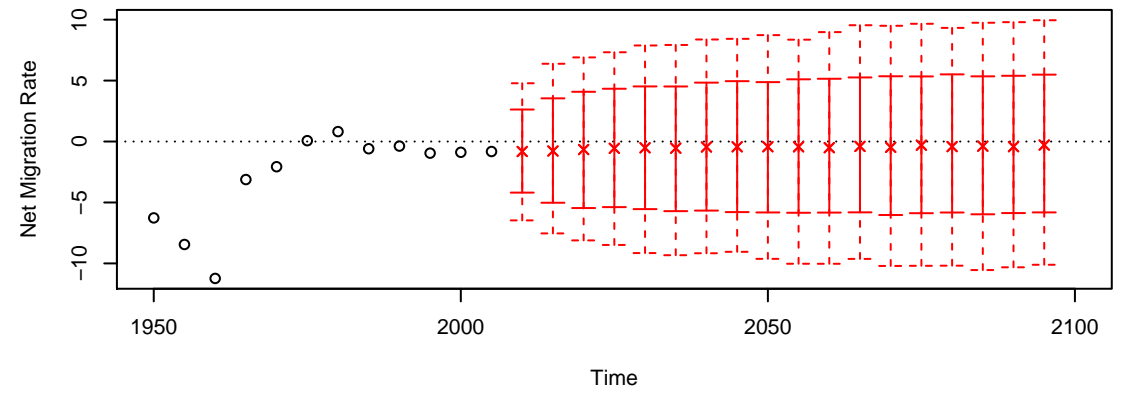

**Egypt Rates**

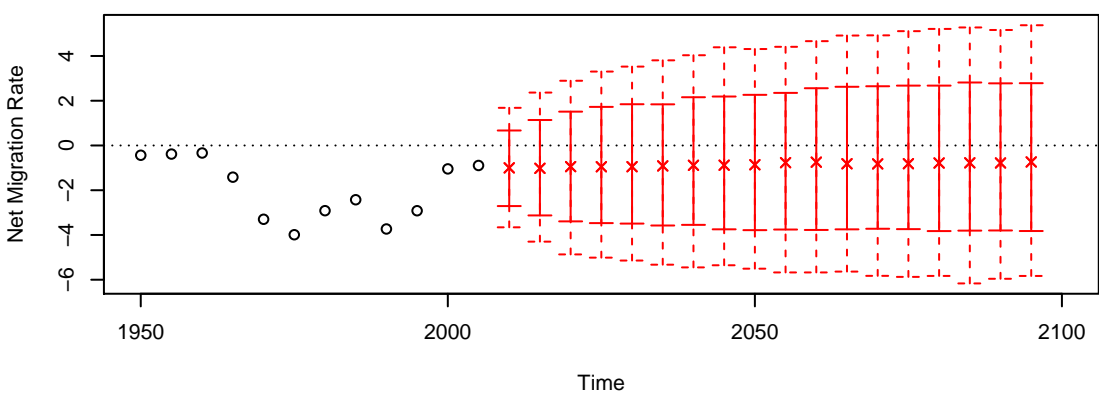

**Libyan Arab Jamahiriya Rates**

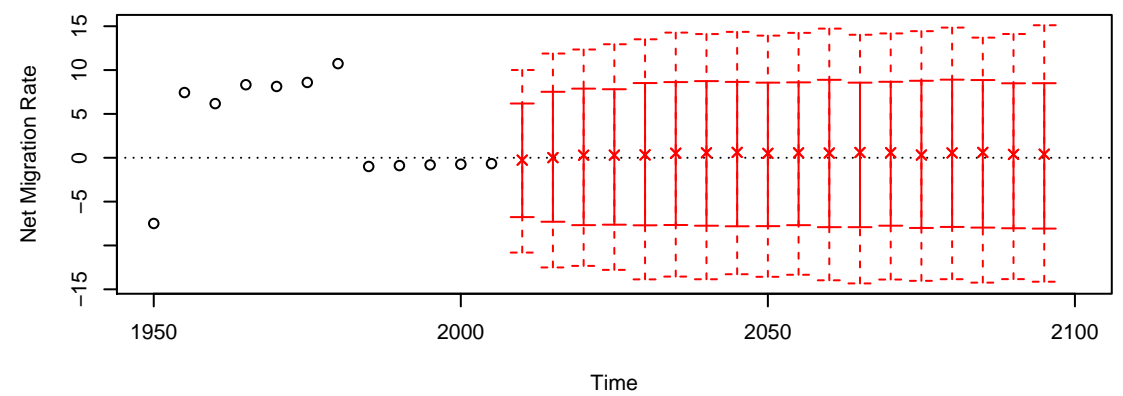

**Morocco Rates**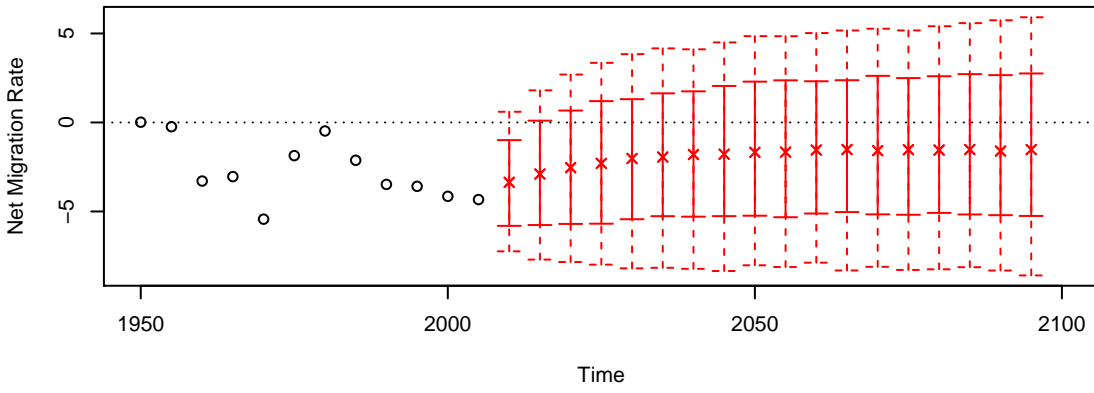**Sudan Rates**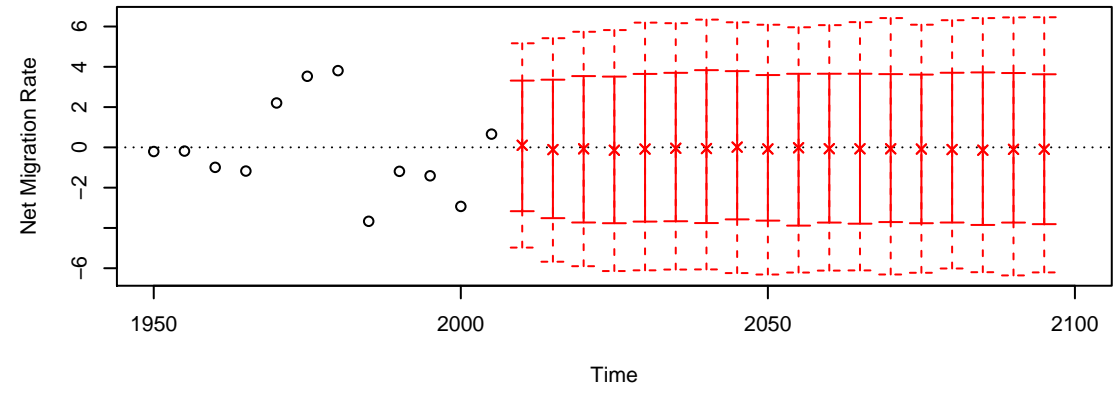**Tunisia Rates**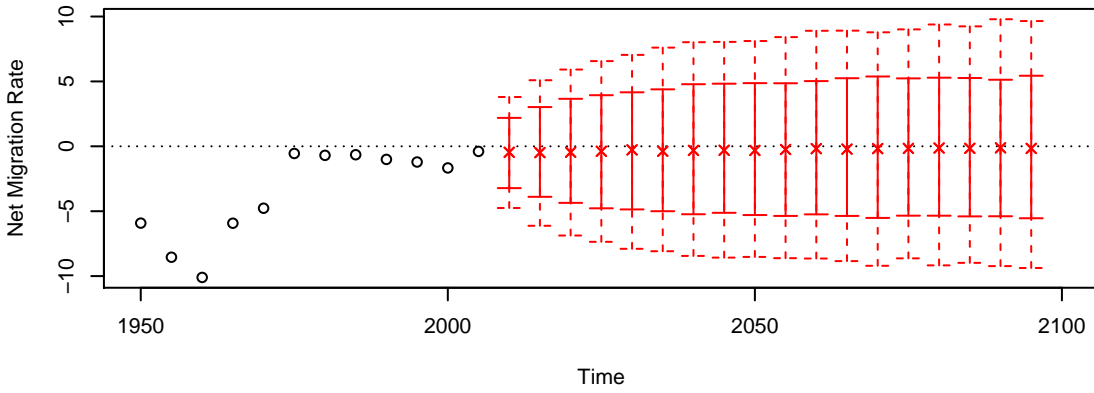**Western Sahara Rates**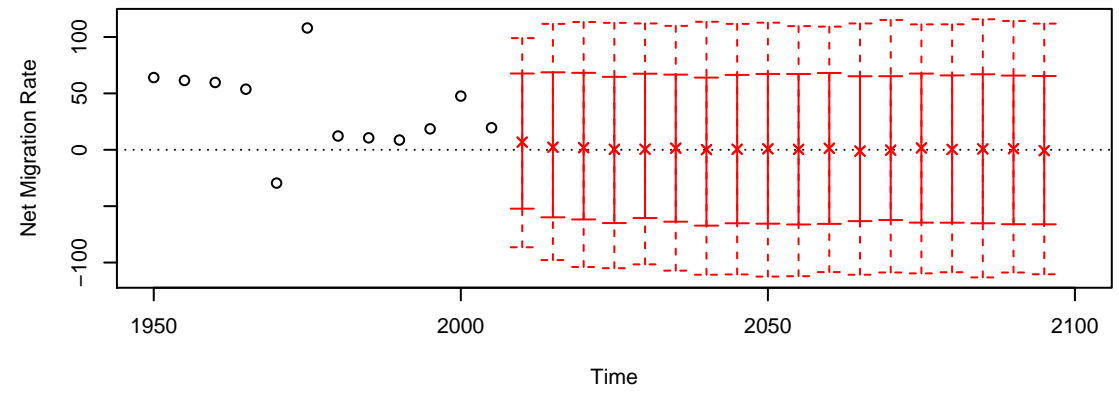**Botswana Rates**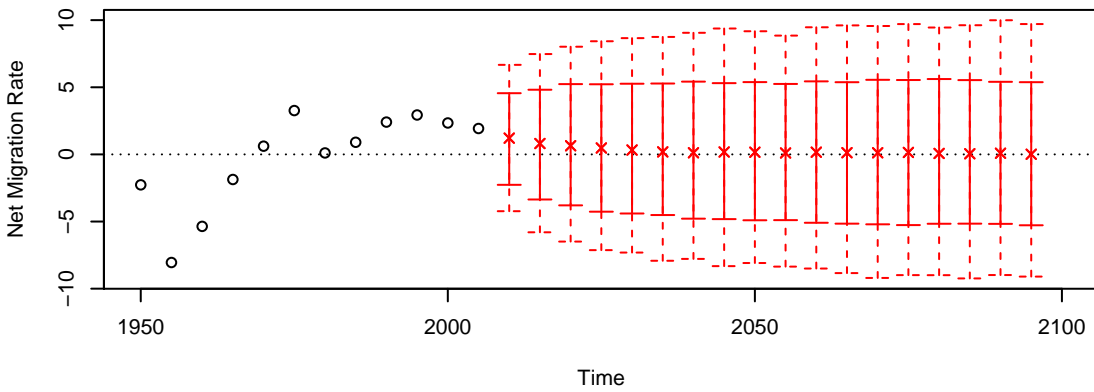**Lesotho Rates**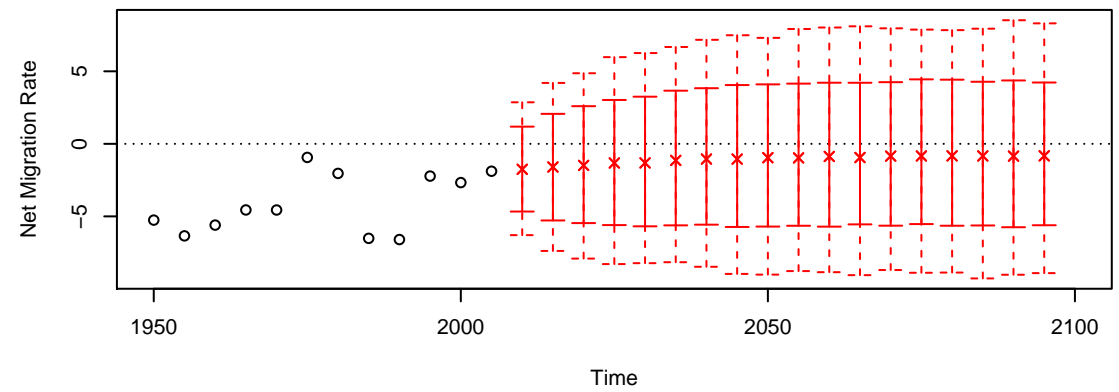

**Namibia Rates**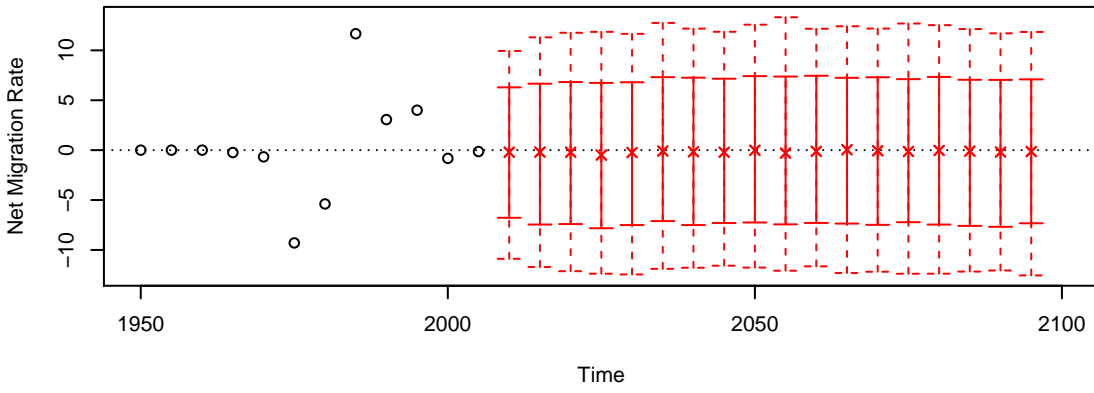**South Africa Rates**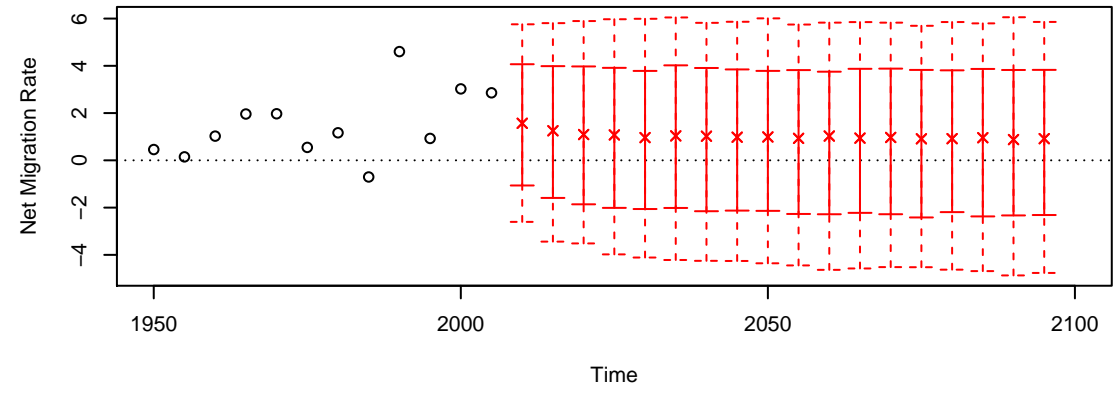**Swaziland Rates**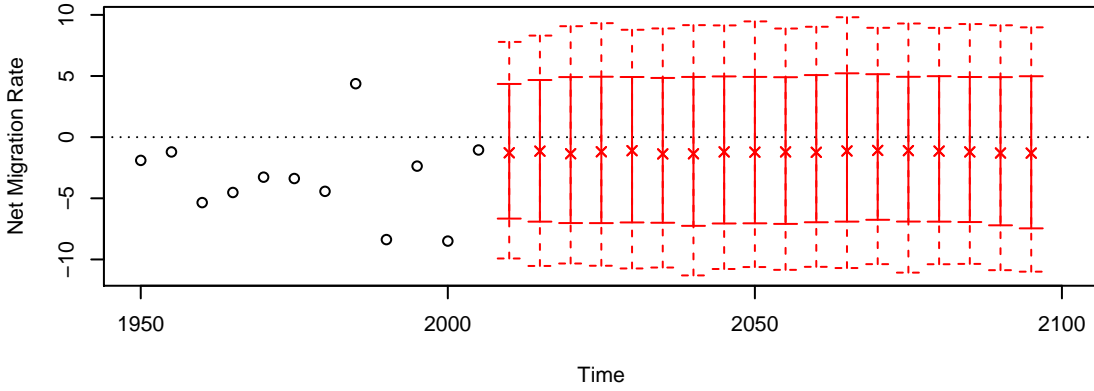**Benin Rates**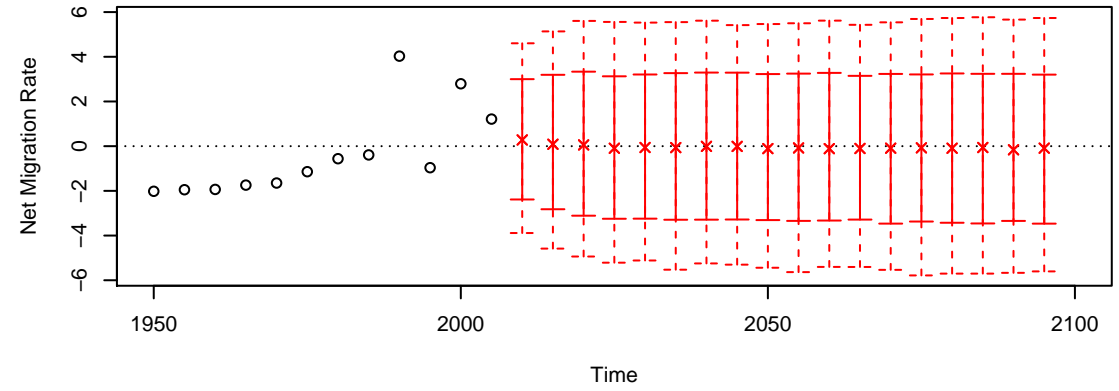**Burkina Faso Rates**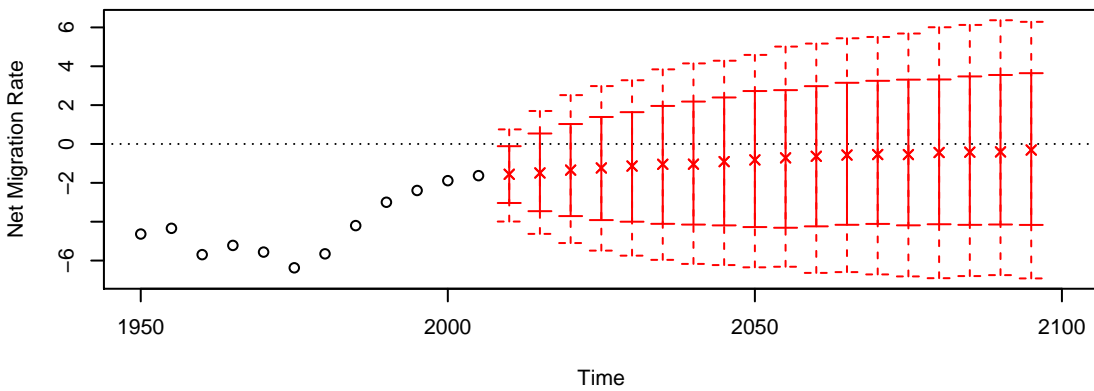**Cape Verde Rates**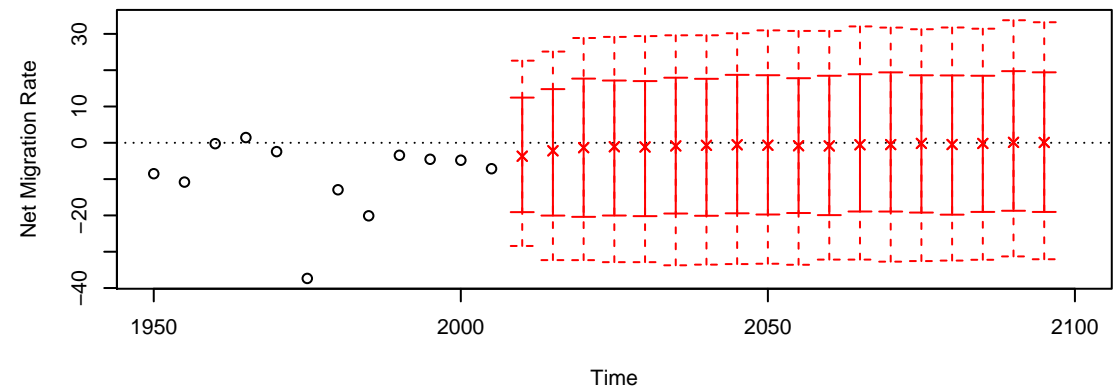

**Côte d'Ivoire Rates**

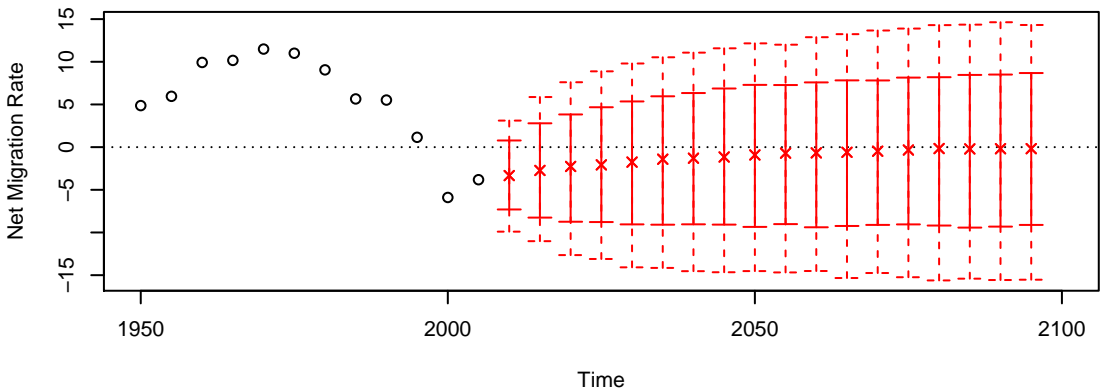

**Gambia Rates**

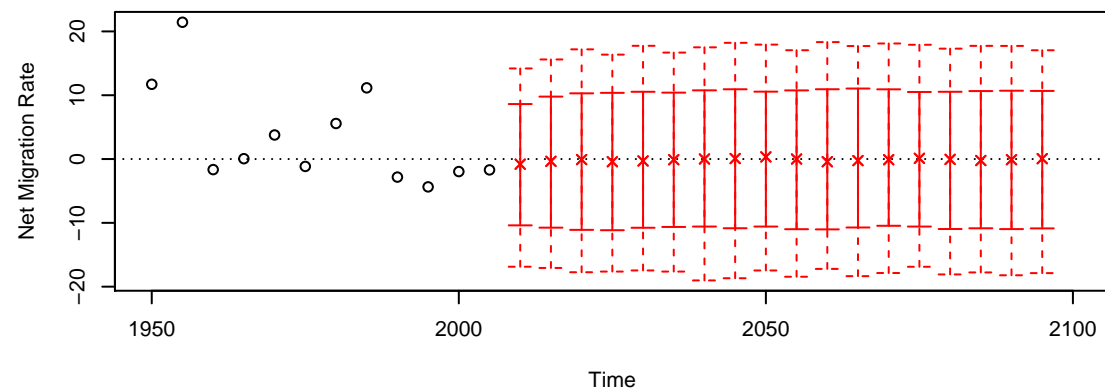

**Ghana Rates**

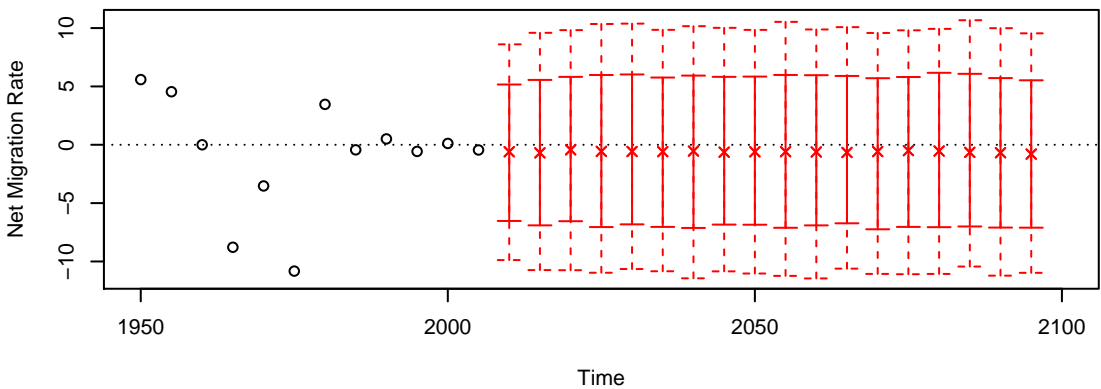

**Guinea Rates**

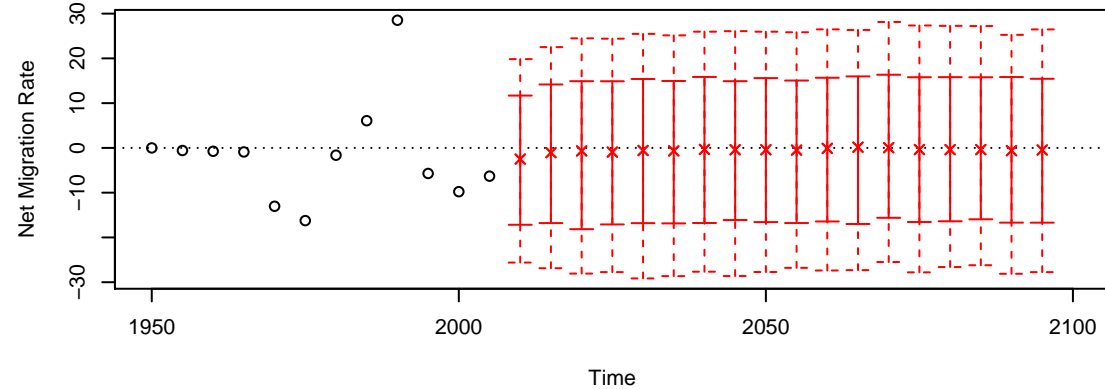

**Guinea-Bissau Rates**

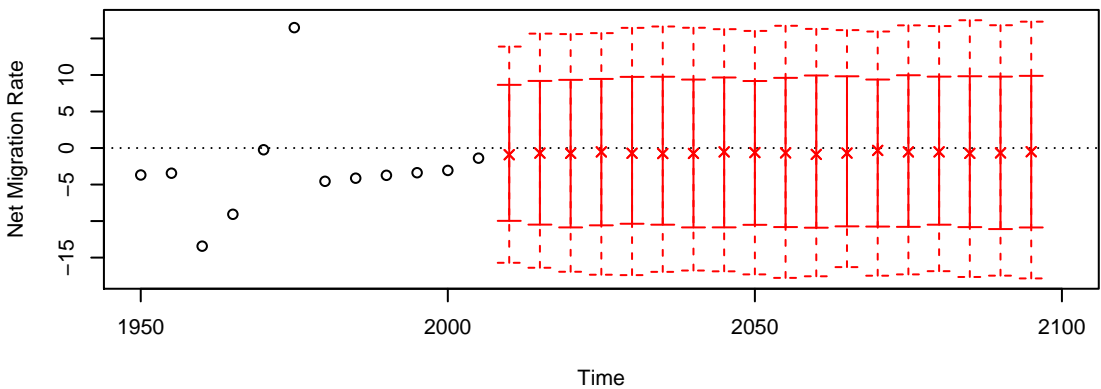

**Liberia Rates**

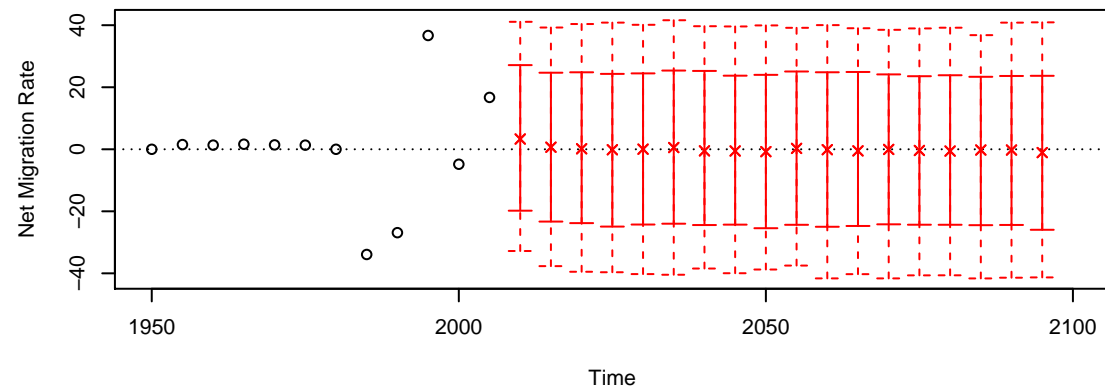



**Mali Rates**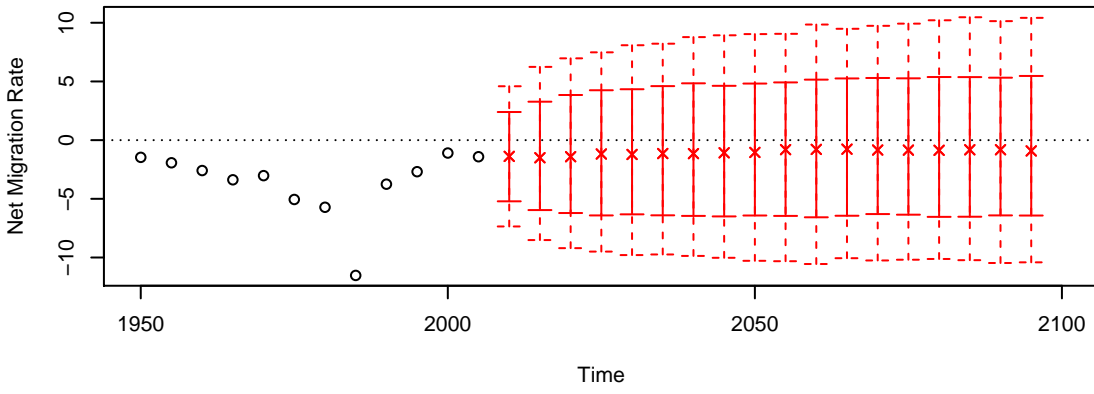**Mauritania Rates**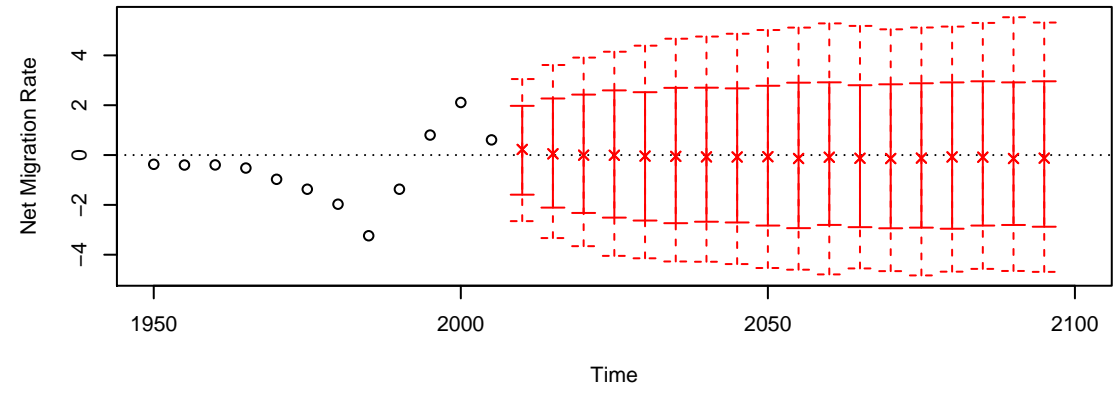**Niger Rates**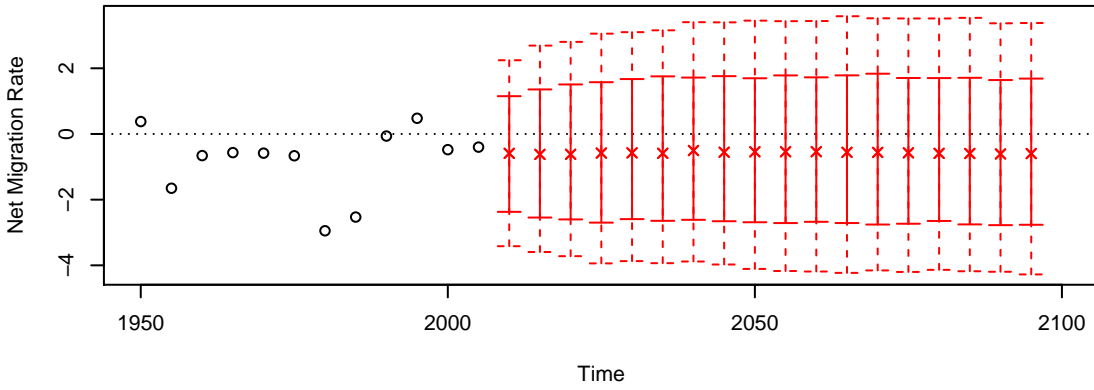**Nigeria Rates**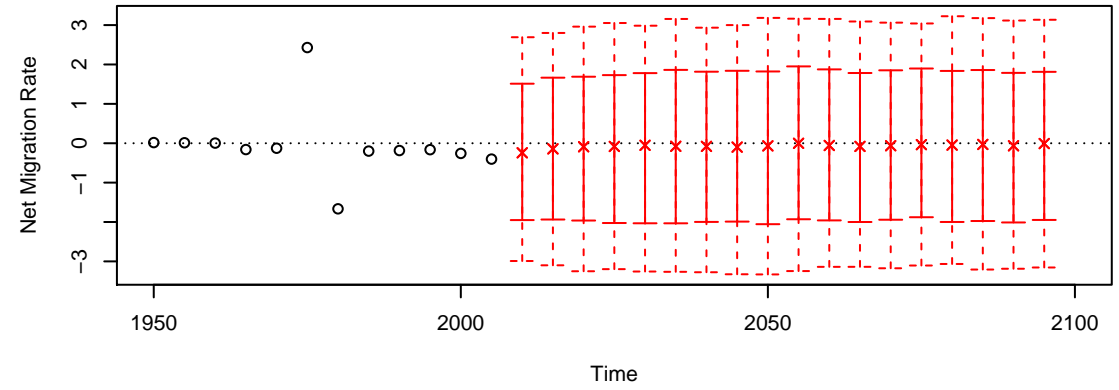**Senegal Rates**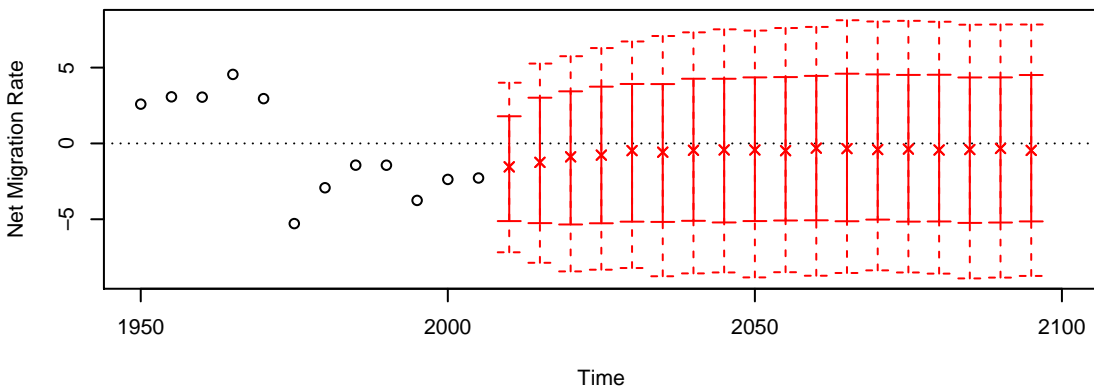**Sierra Leone Rates**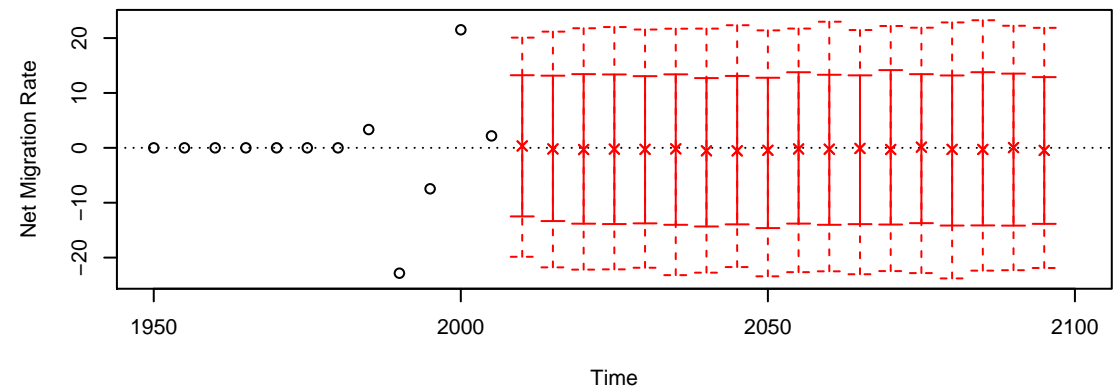

**Togo Rates**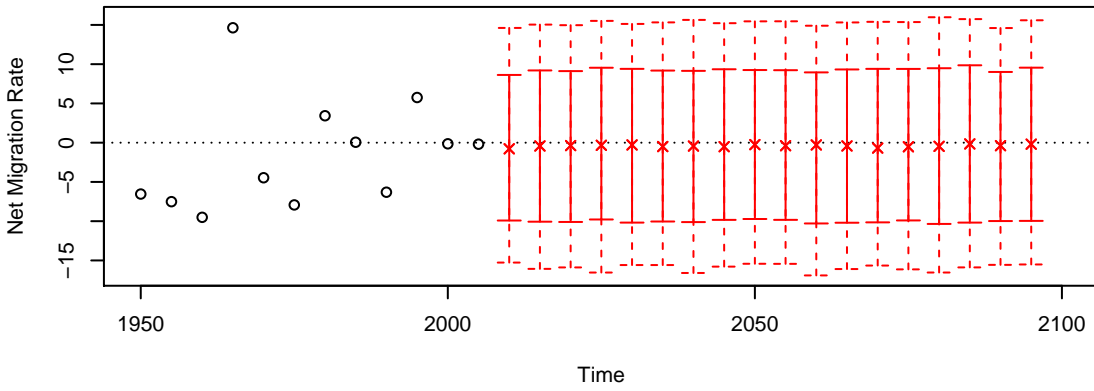**China Rates**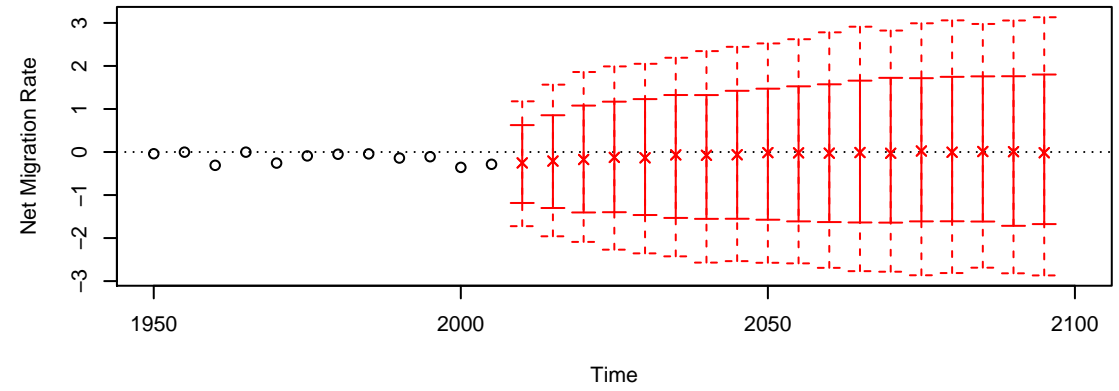**China, Hong Kong SAR Rates**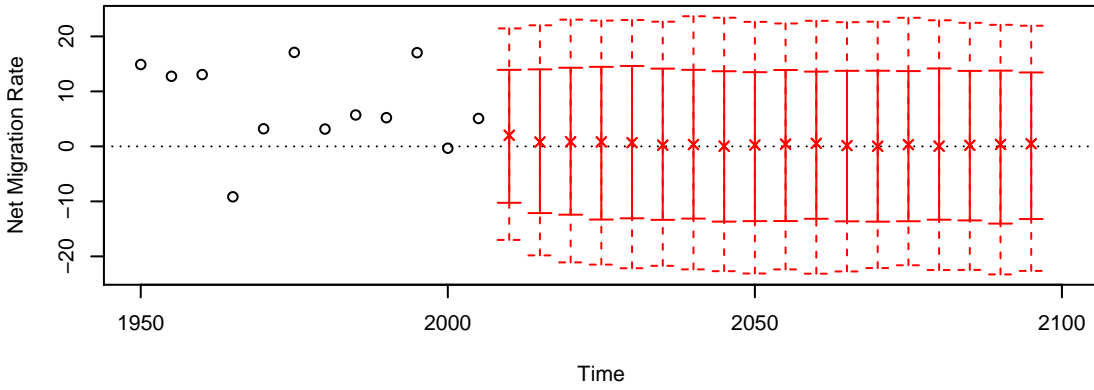**China, Macao SAR Rates**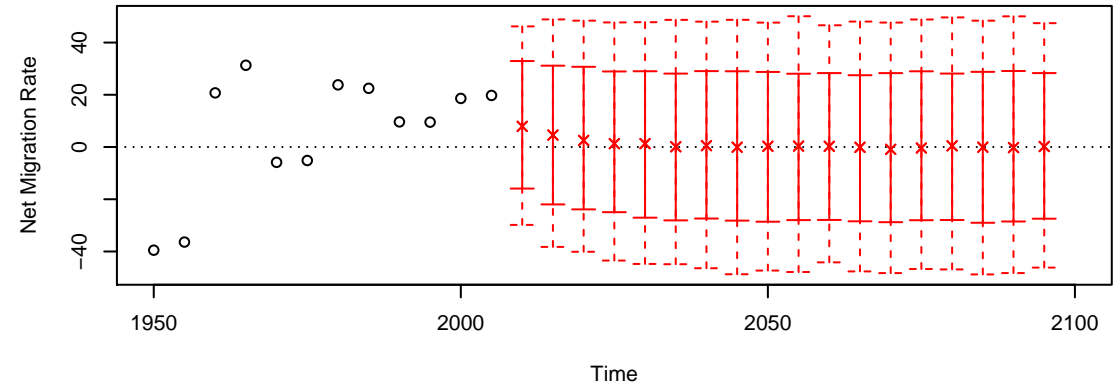**Dem. People's Republic of Korea Rates**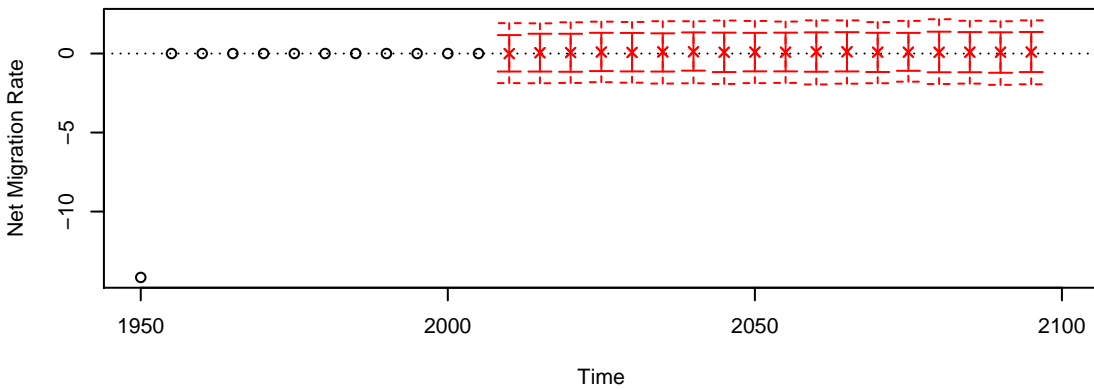**Japan Rates**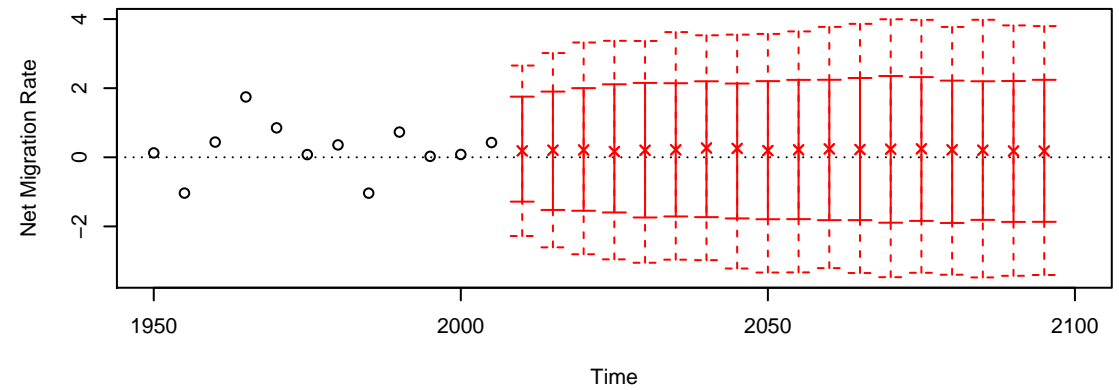

**Mongolia Rates**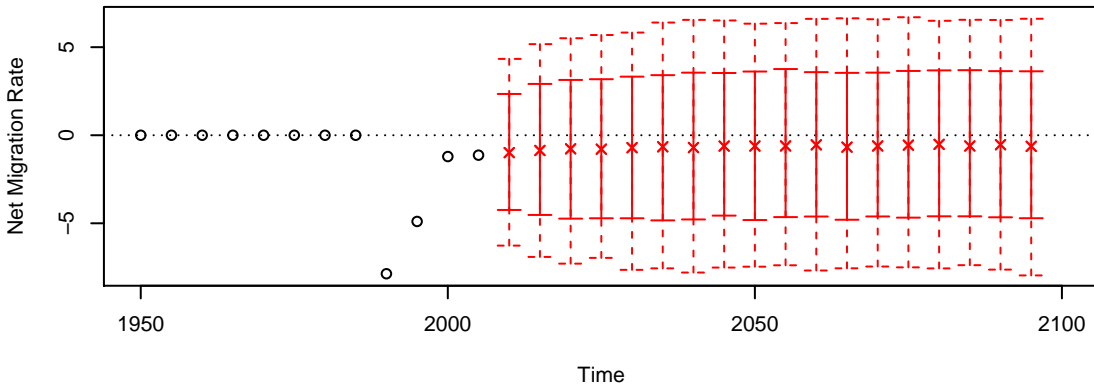**Republic of Korea Rates**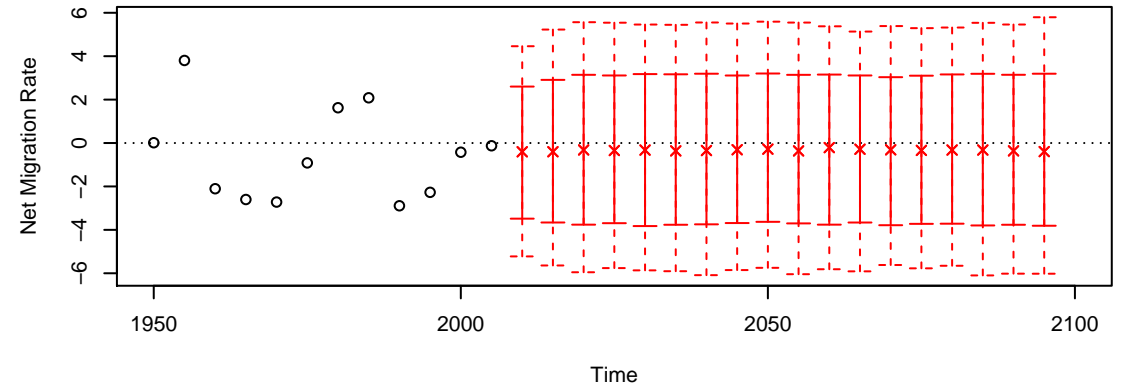**Other non-specified areas Rates**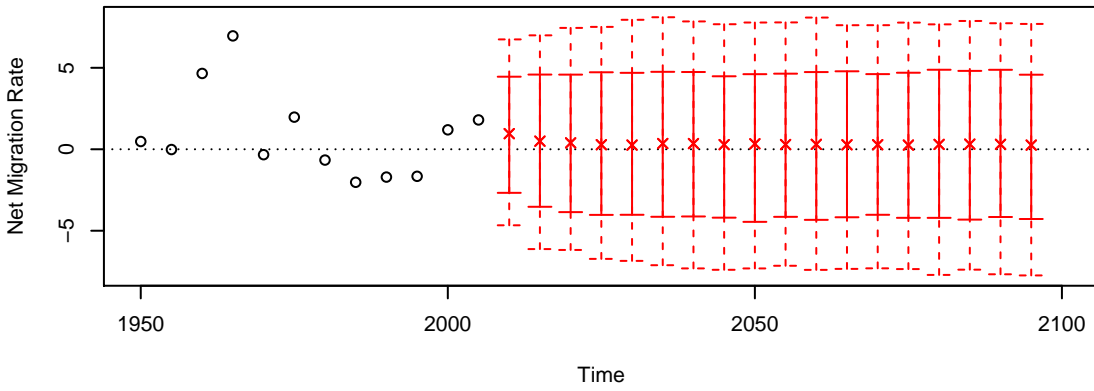**Kazakhstan Rates**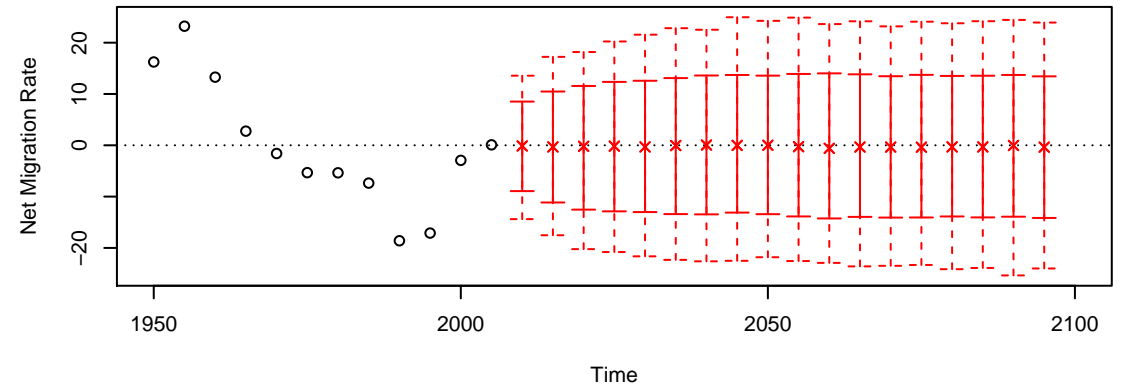**Kyrgyzstan Rates**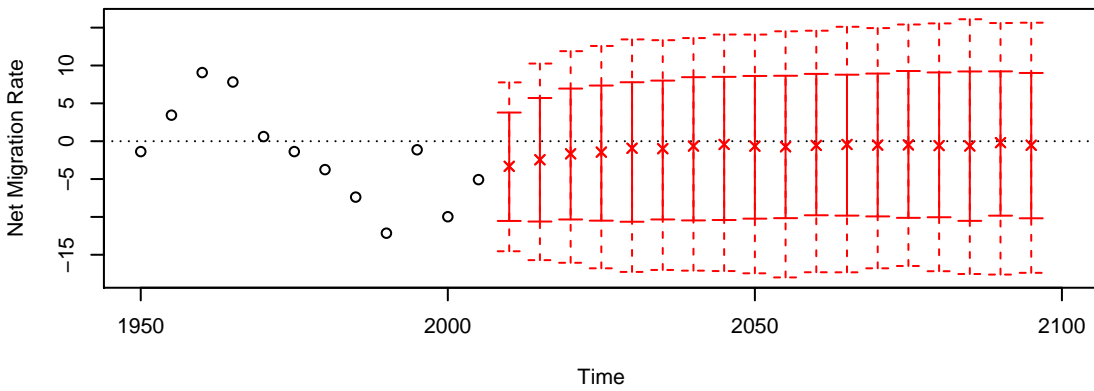**Tajikistan Rates**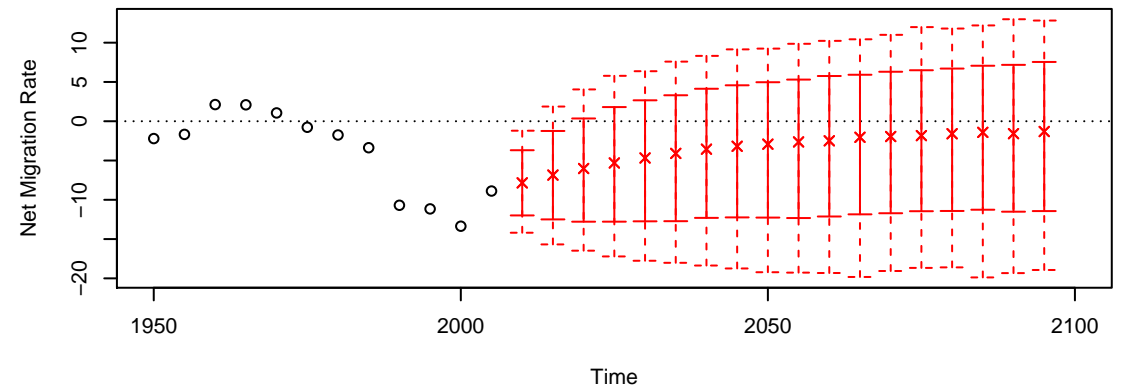

**Turkmenistan Rates**

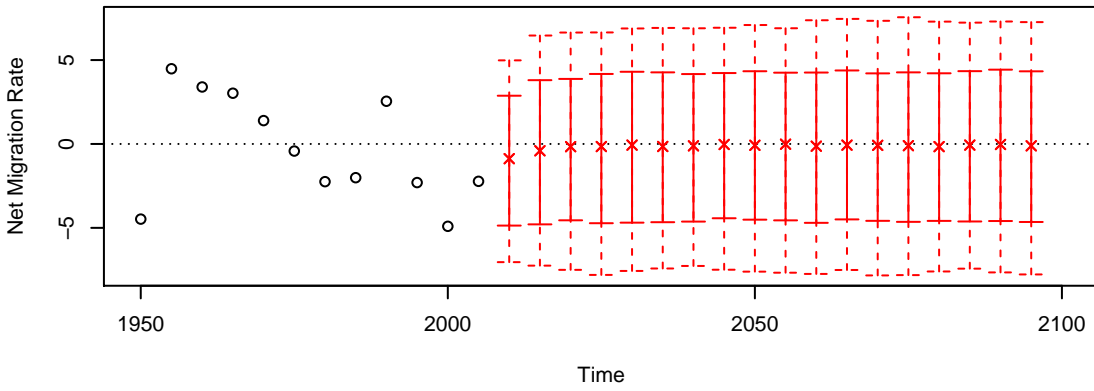

**Uzbekistan Rates**

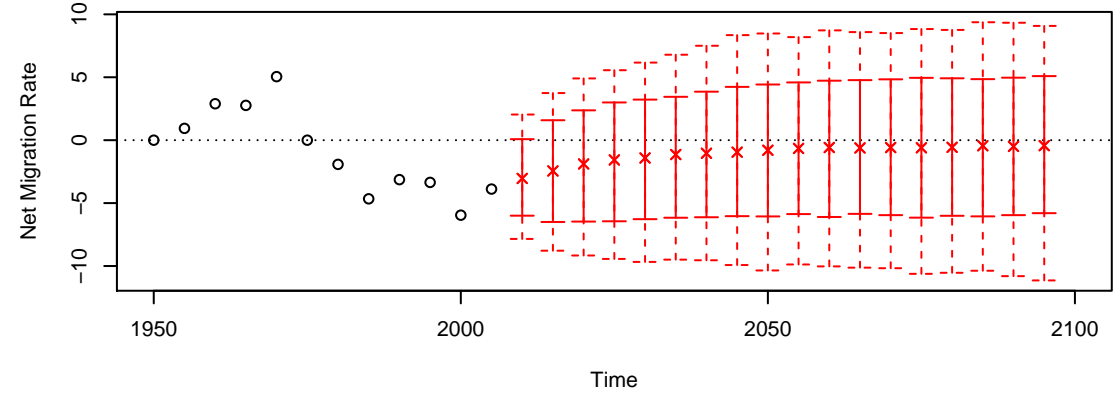

**Afghanistan Rates**

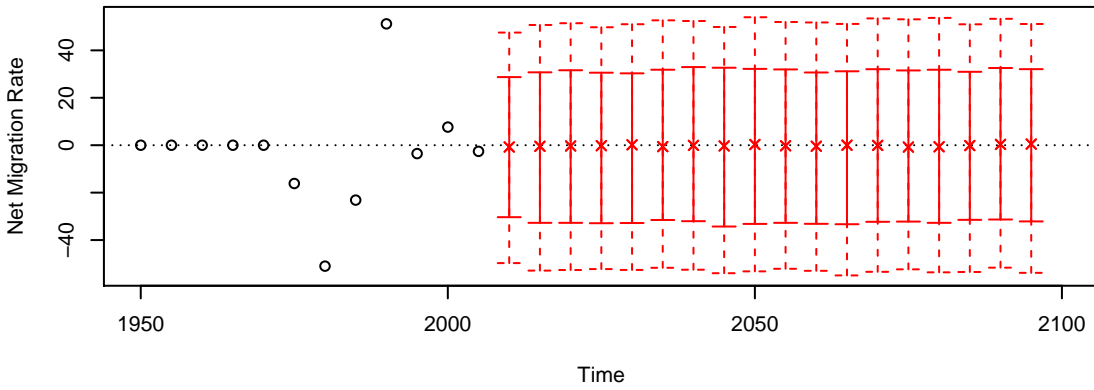

**Bangladesh Rates**

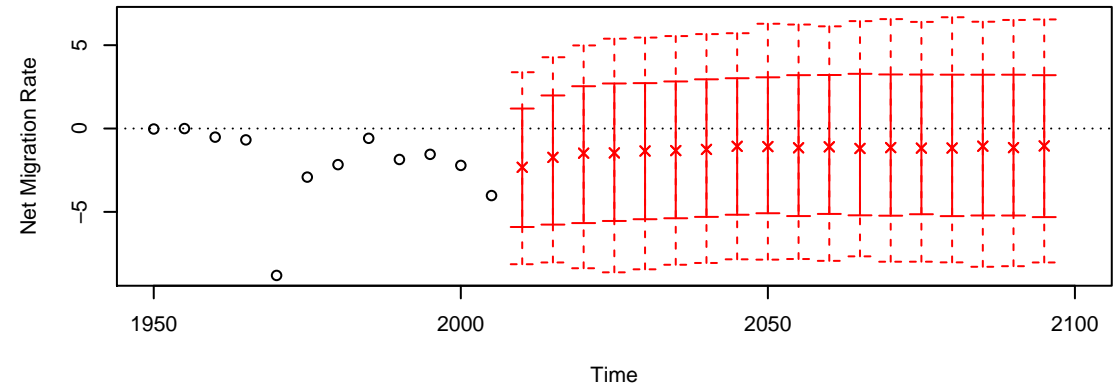

**Bhutan Rates**

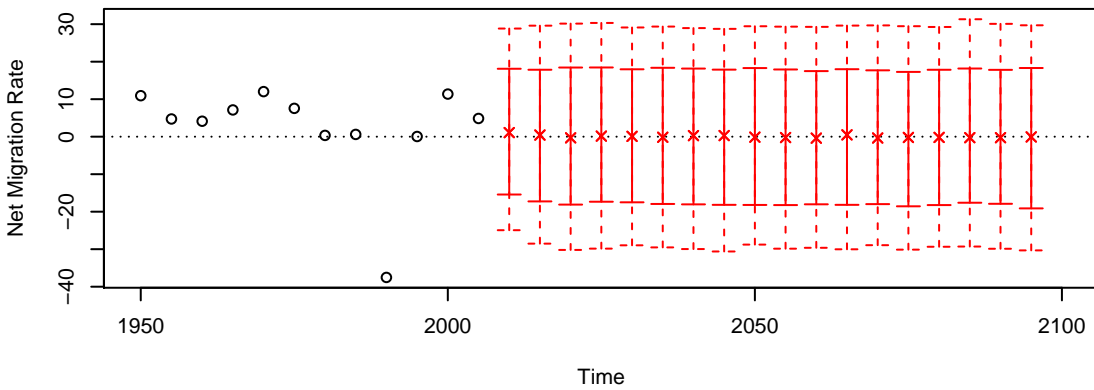

**India Rates**

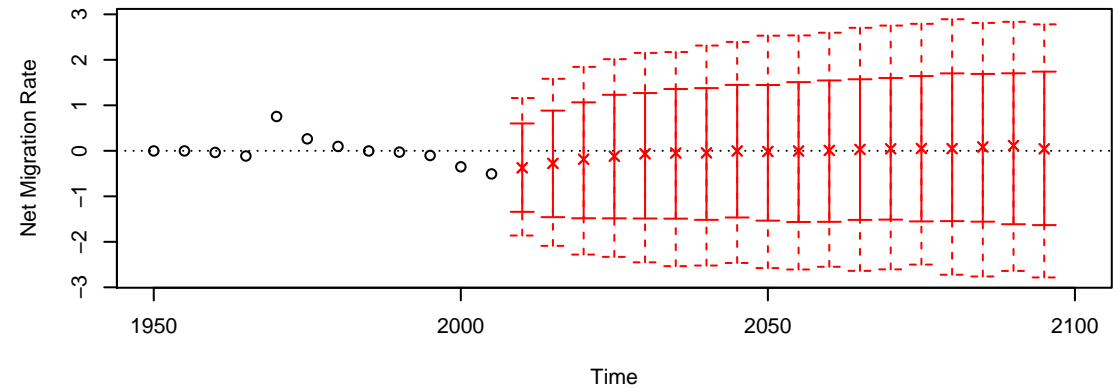

**Iran (Islamic Republic of) Rates**

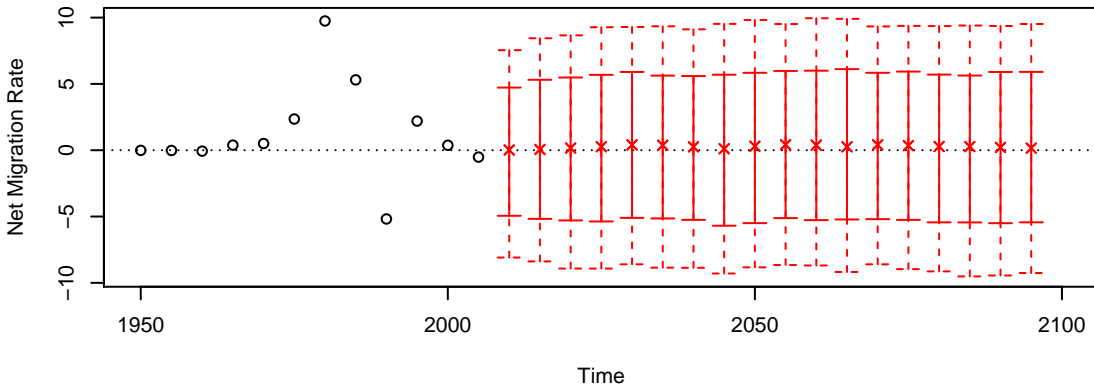

**Maldives Rates**

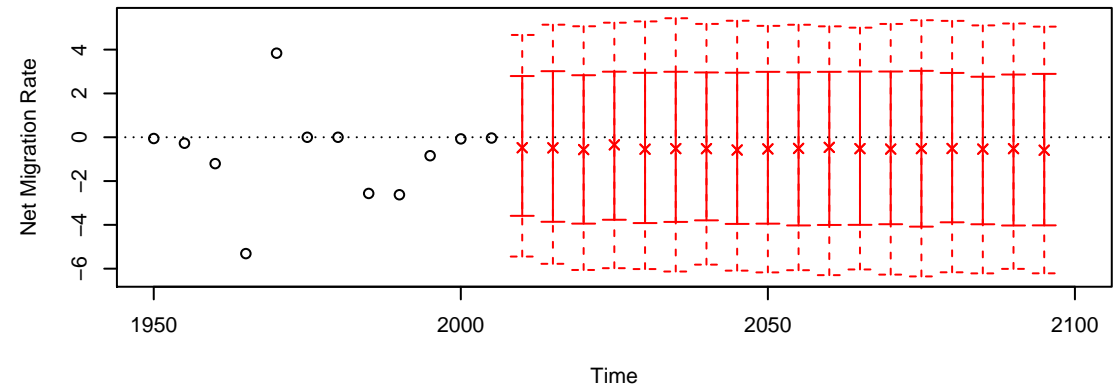

**Nepal Rates**

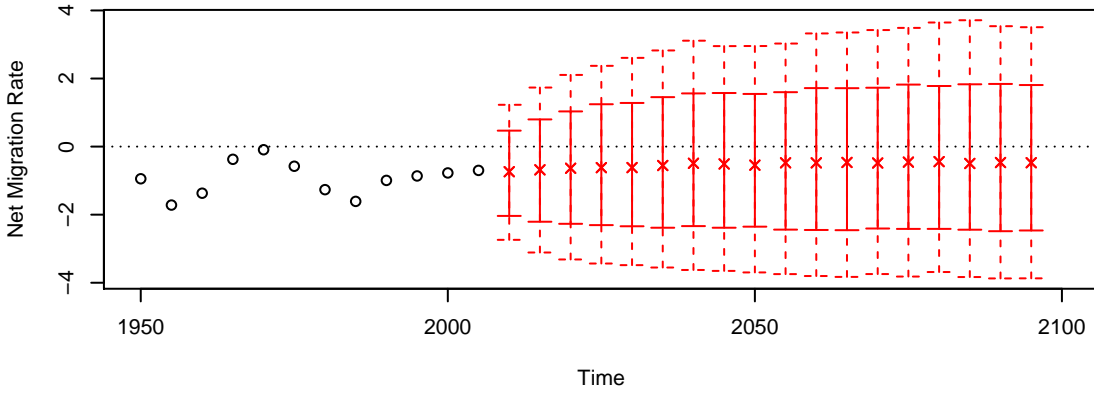

**Pakistan Rates**

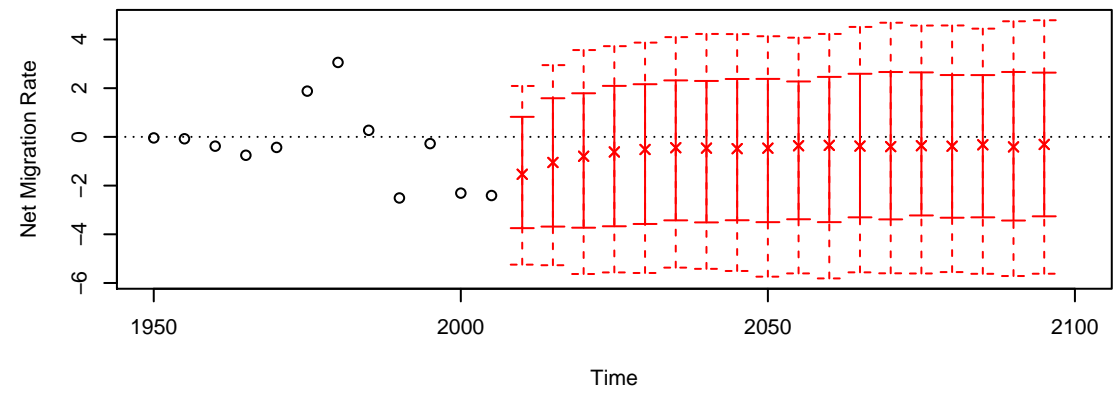

**Sri Lanka Rates**

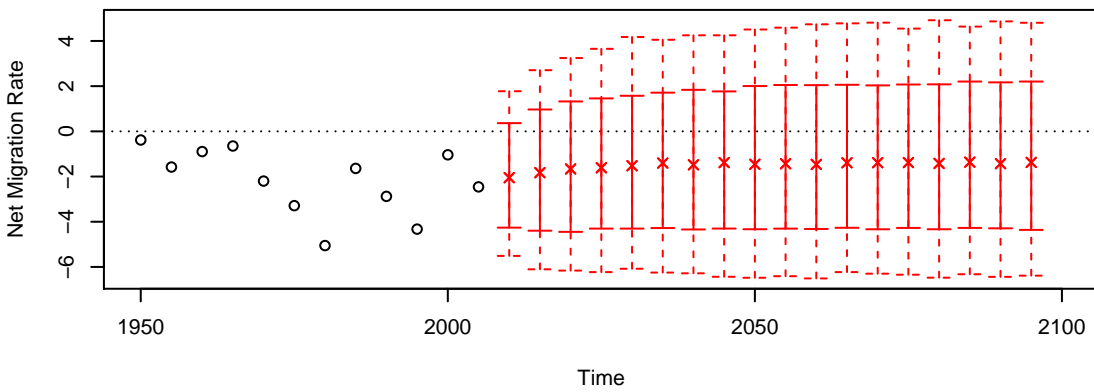

**Brunei Darussalam Rates**

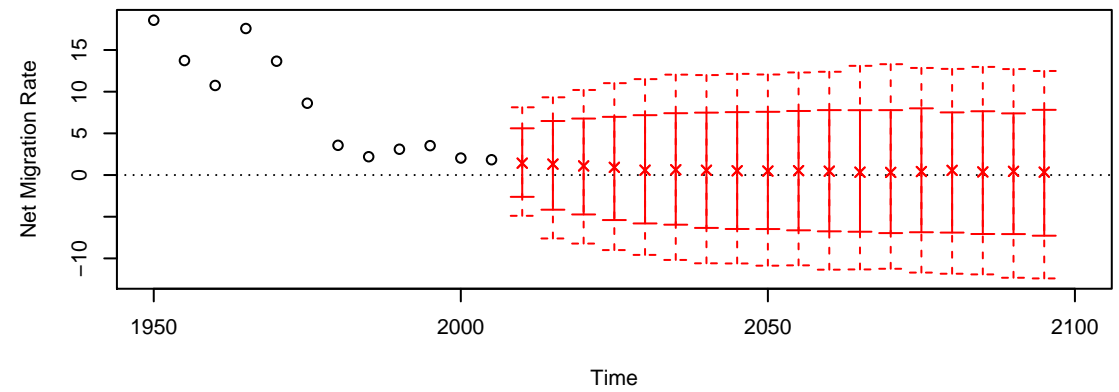

### Cambodia Rates

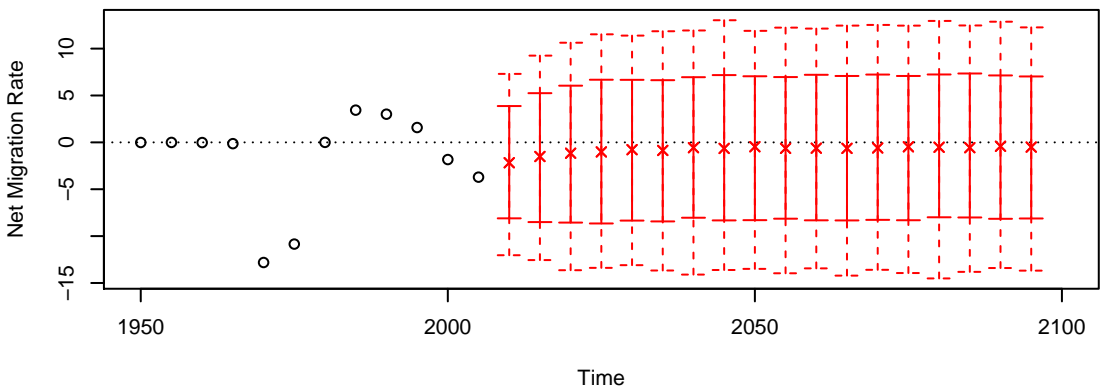

### Indonesia Rates

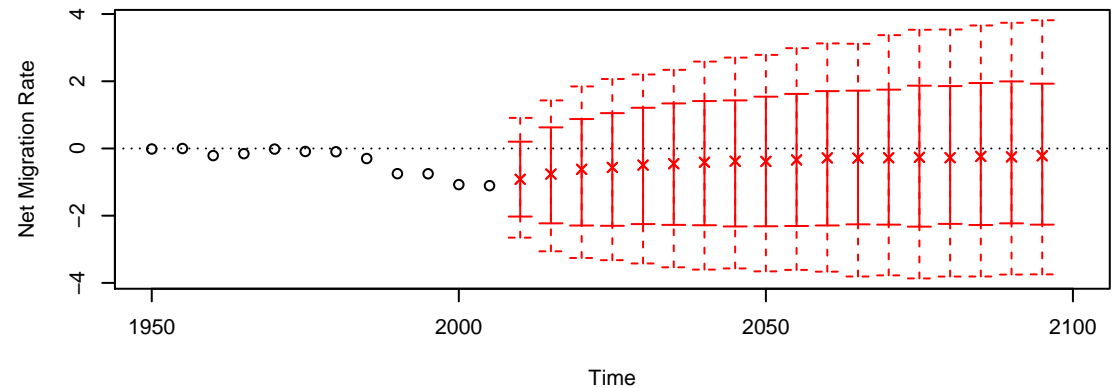

### Lao People's Democratic Republic Rates

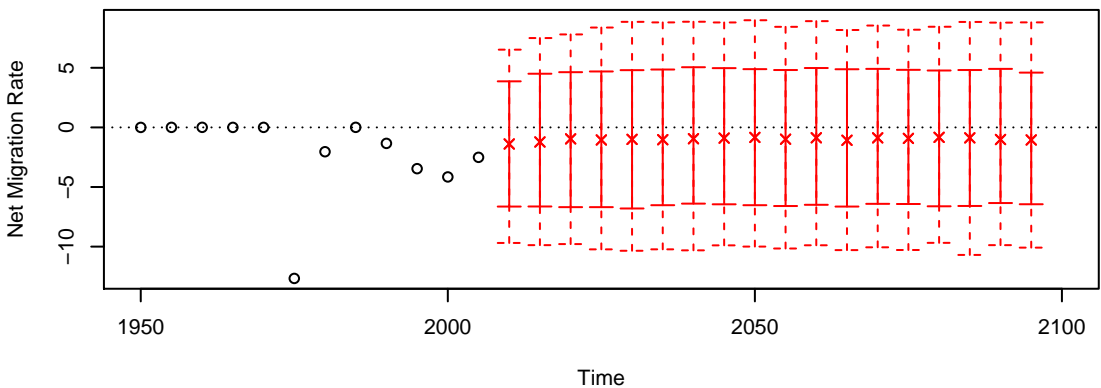

### Malaysia Rates

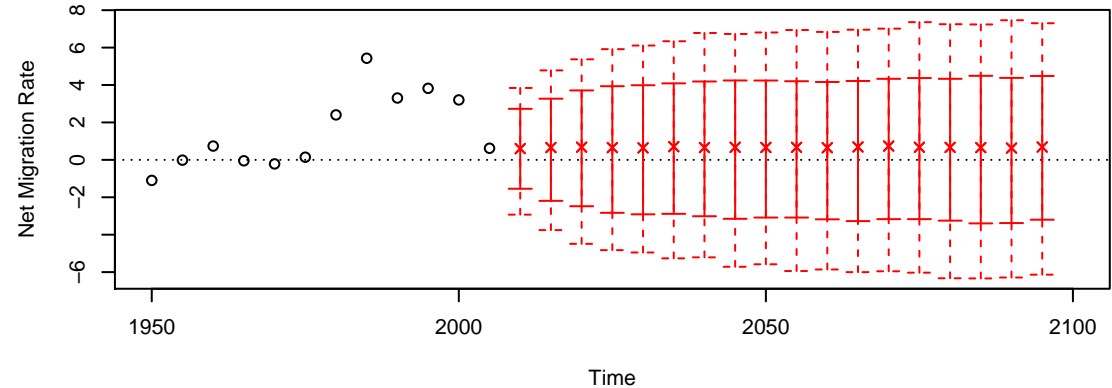

### Myanmar Rates

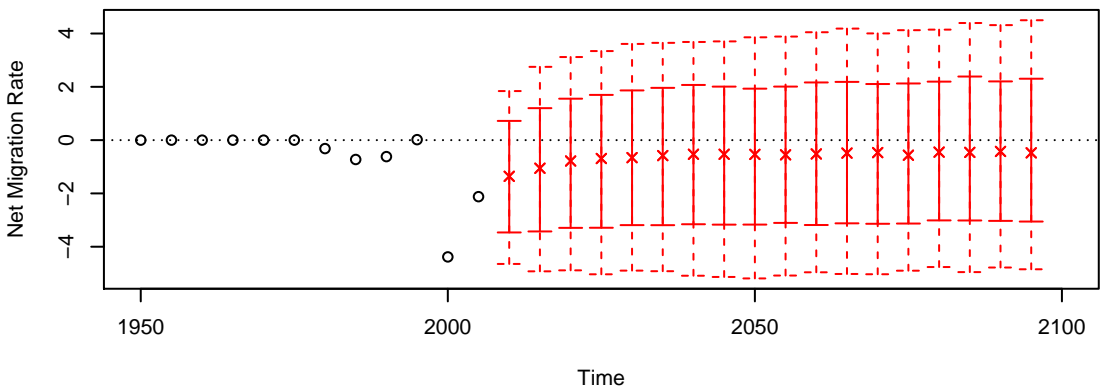

### Philippines Rates

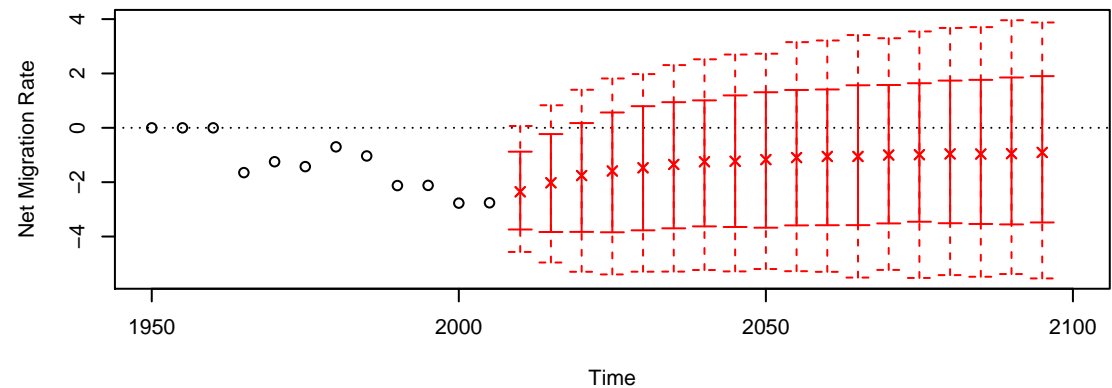

**Singapore Rates**

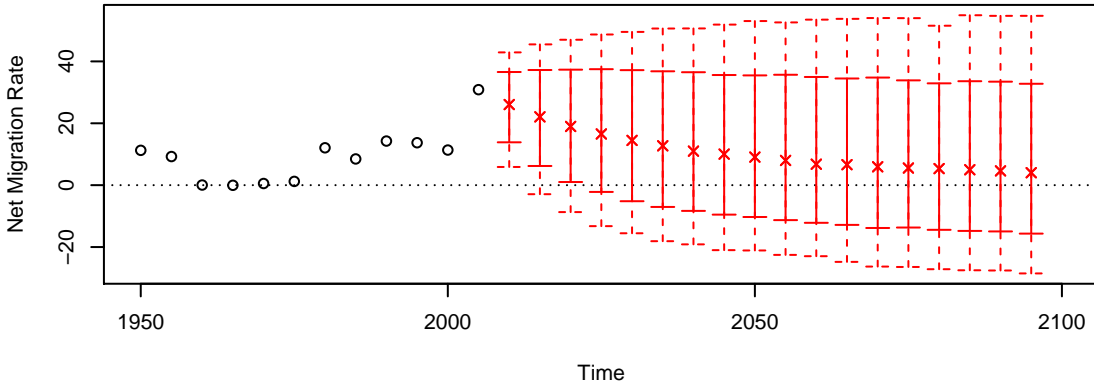

**Thailand Rates**

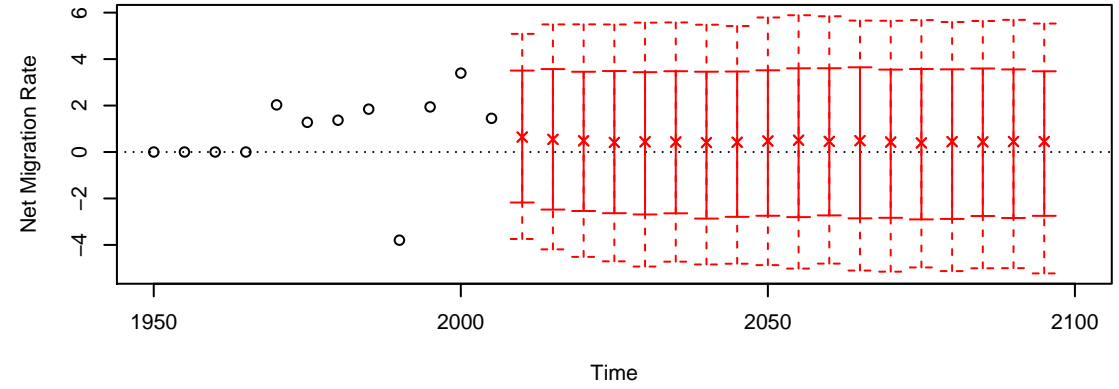

**Timor-Leste Rates**

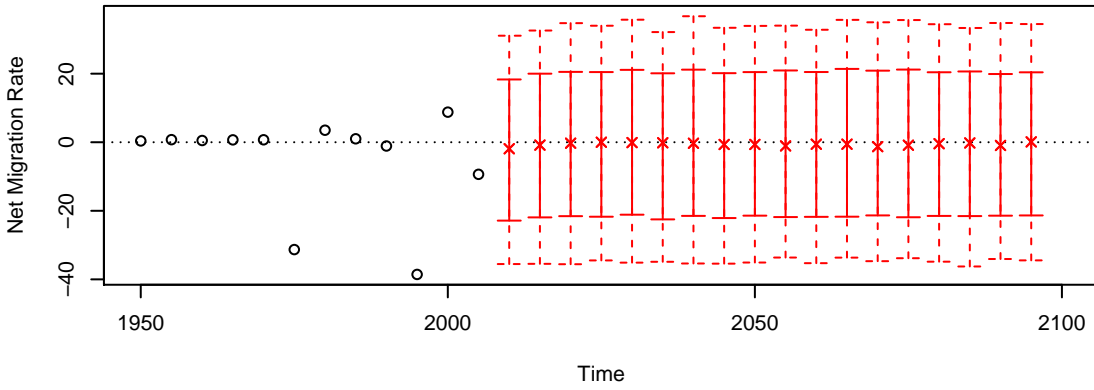

**Viet Nam Rates**

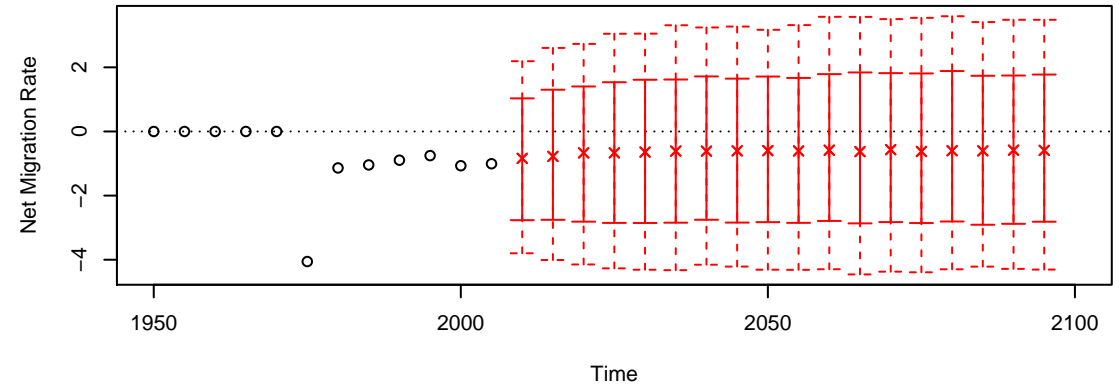

**Armenia Rates**

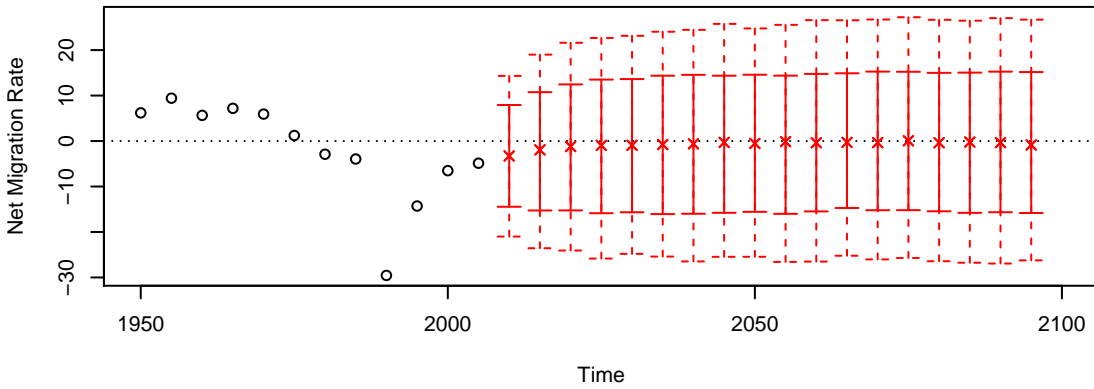

**Azerbaijan Rates**

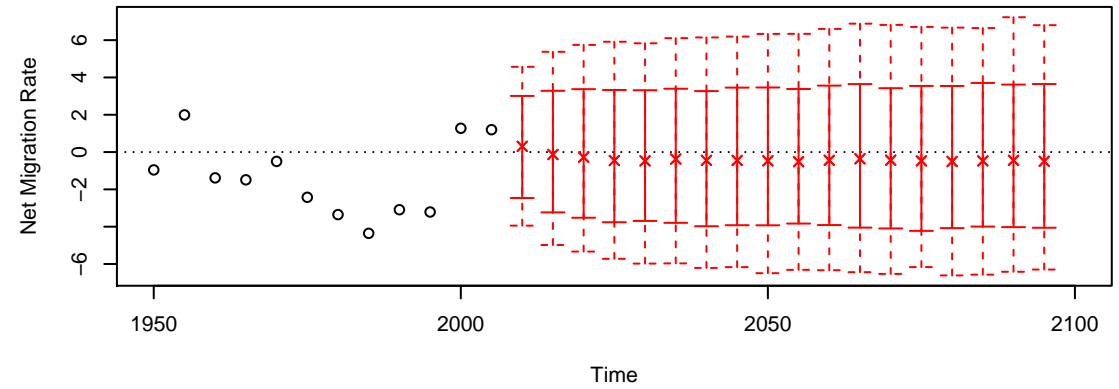

**Bahrain Rates**

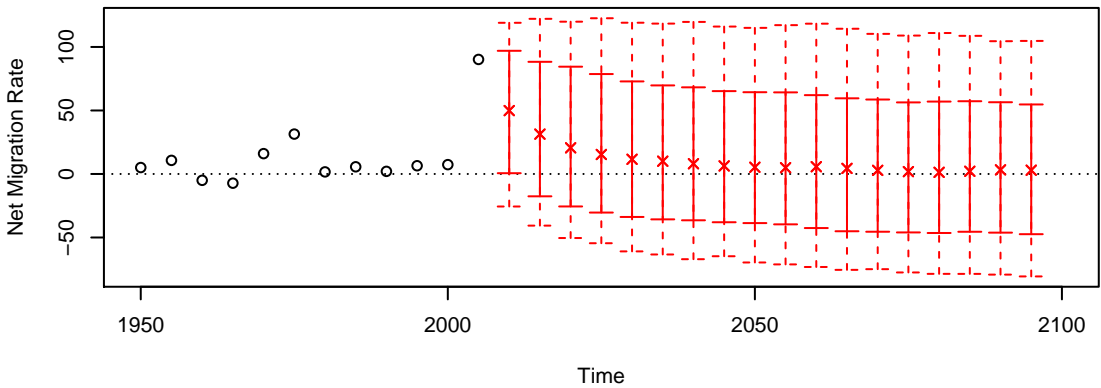

**Cyprus Rates**

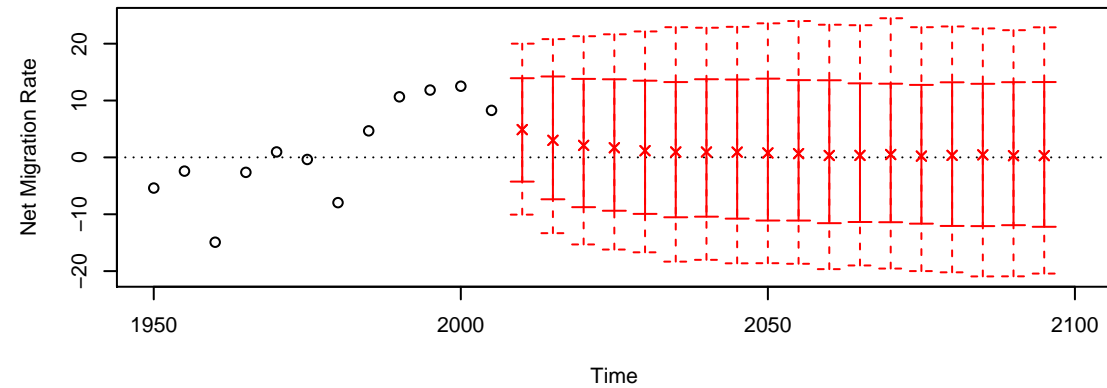

**Georgia Rates**

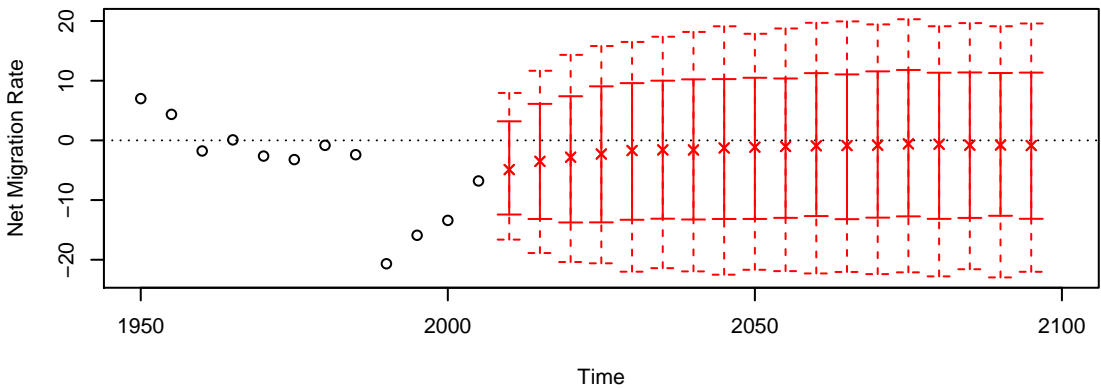

**Iraq Rates**

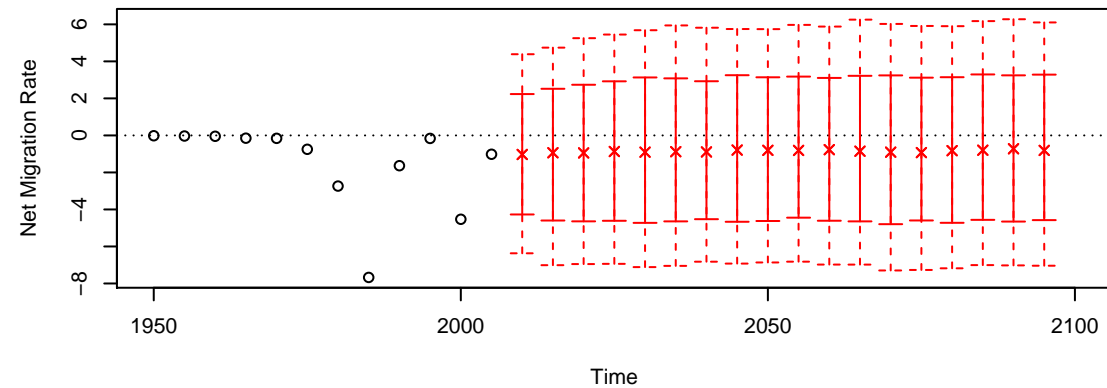

**Israel Rates**

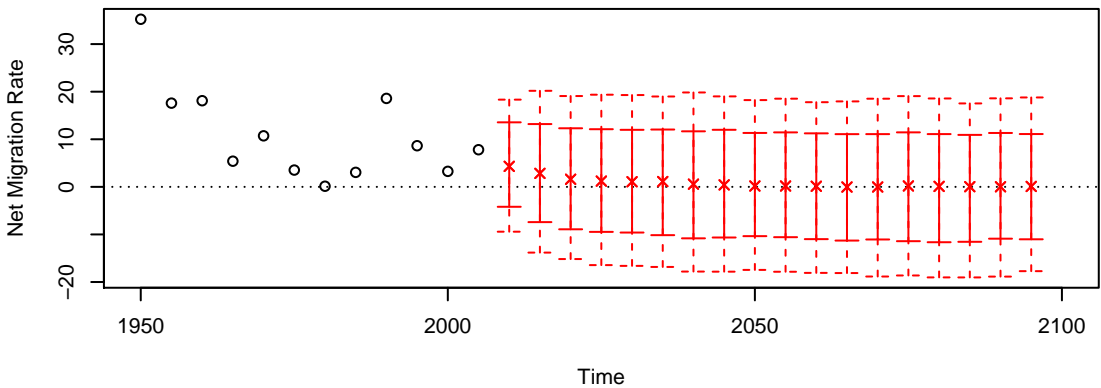

**Jordan Rates**

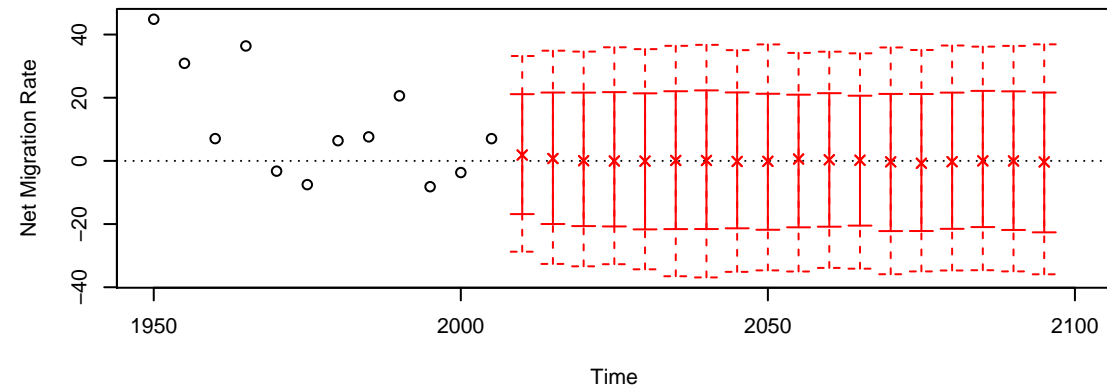



**Kuwait Rates**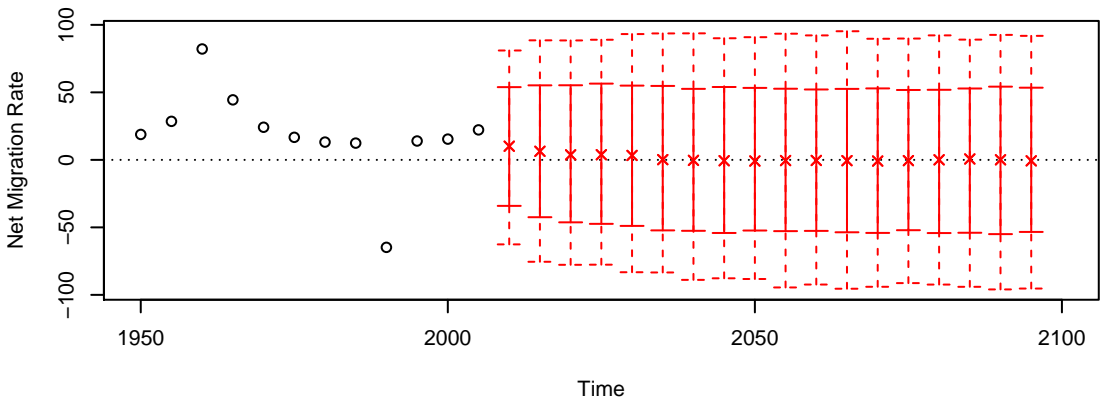**Lebanon Rates**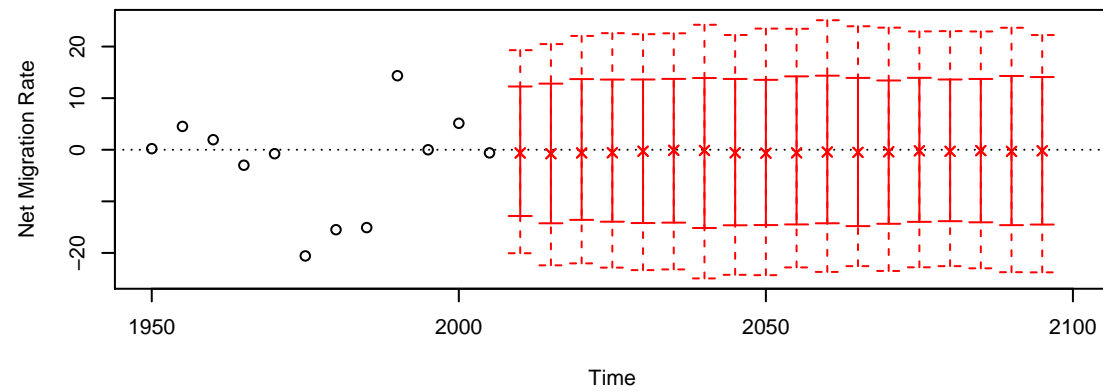**Occupied Palestinian Territory Rates**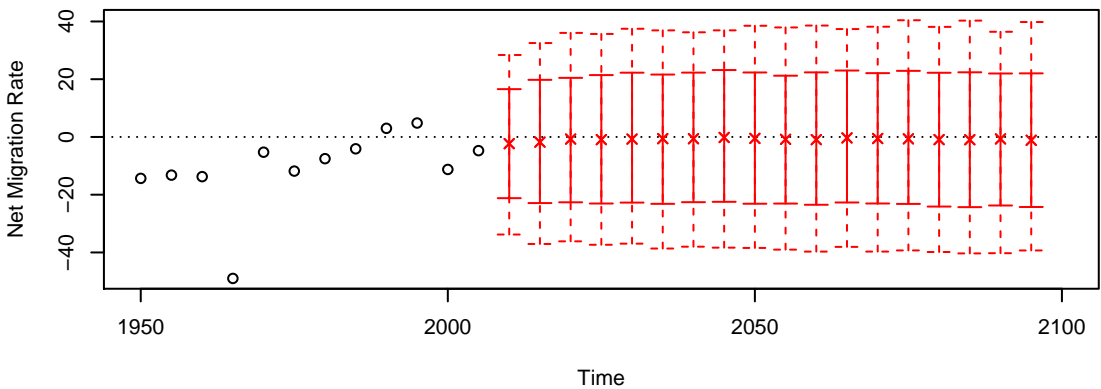**Oman Rates**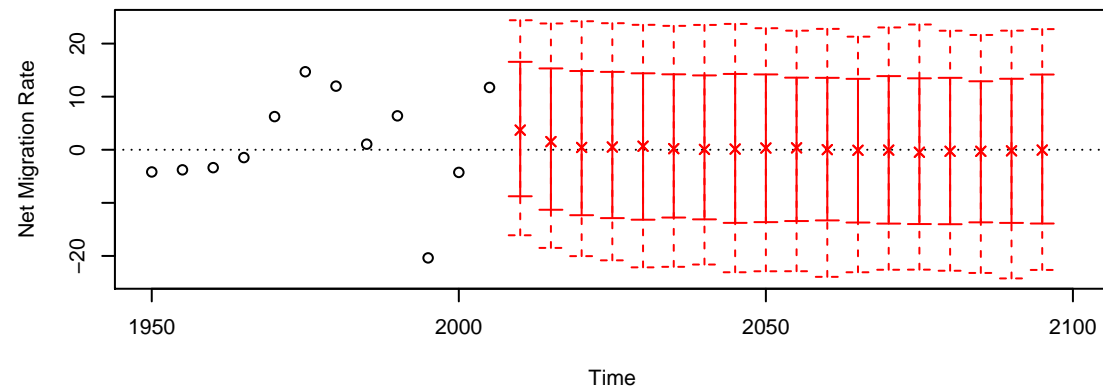**Qatar Rates**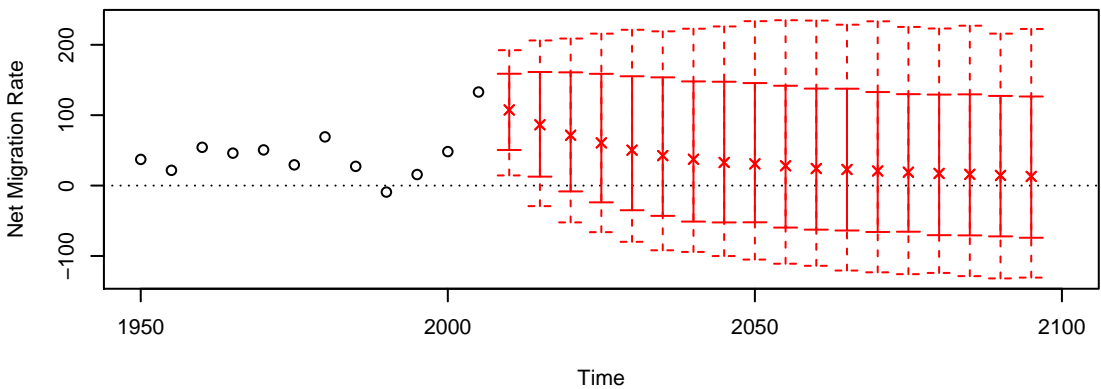**Saudi Arabia Rates**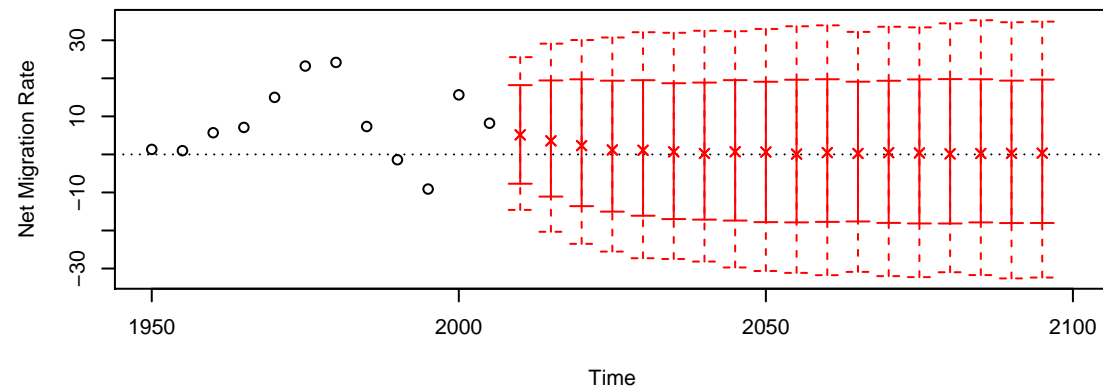

**Syrian Arab Republic Rates**

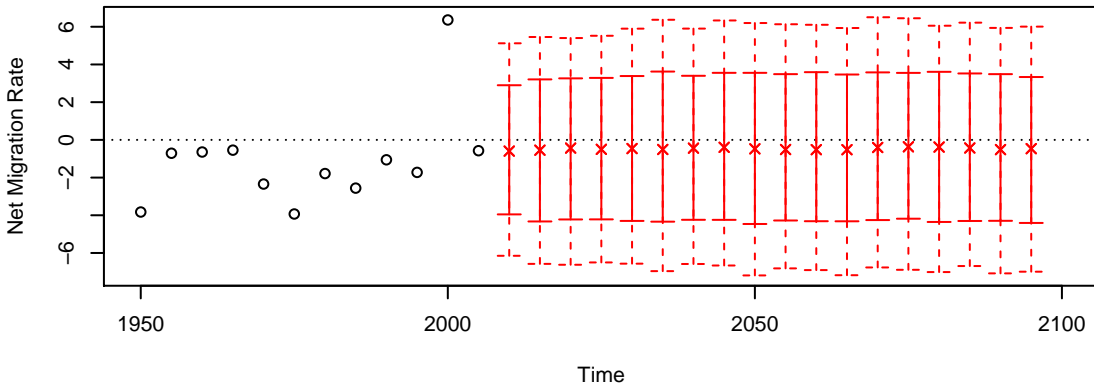

**Turkey Rates**

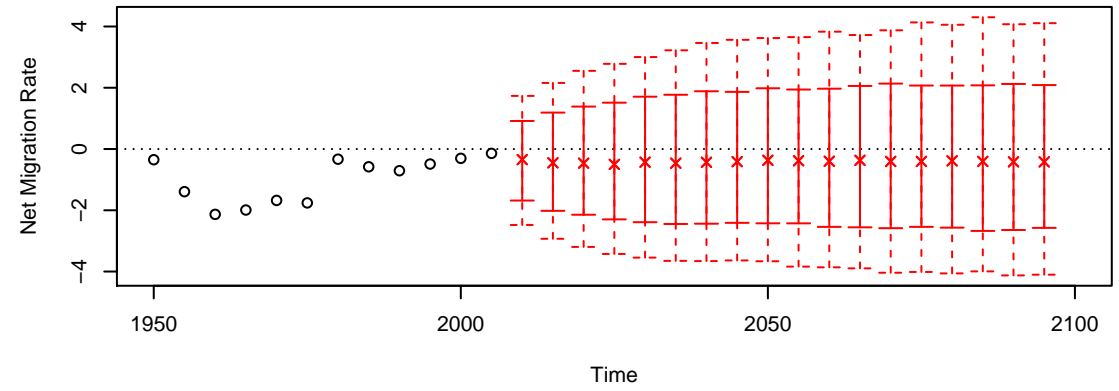

**United Arab Emirates Rates**

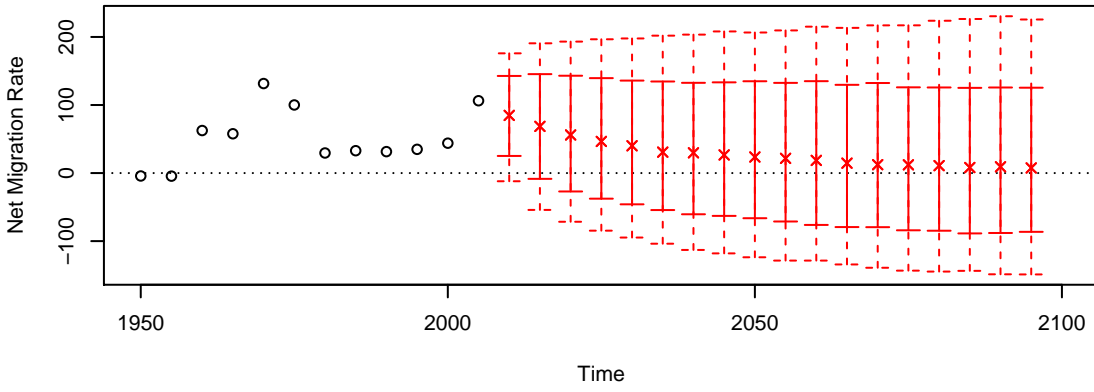

**Yemen Rates**

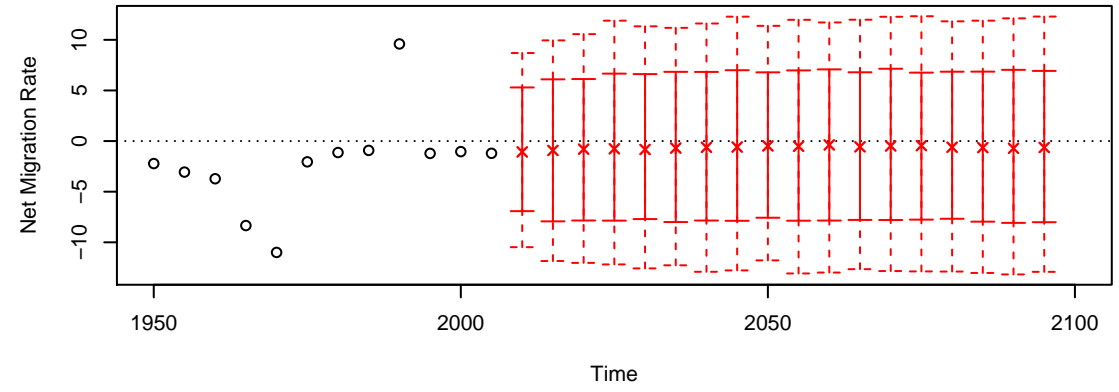

**Belarus Rates**

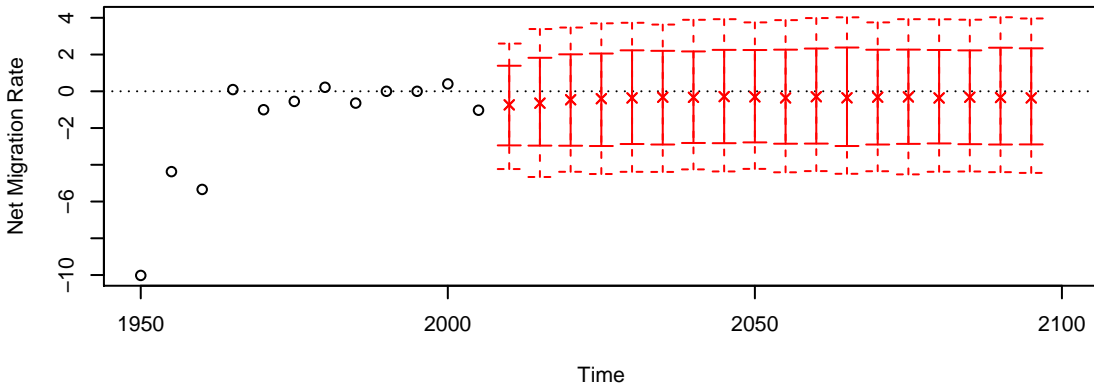

**Bulgaria Rates**

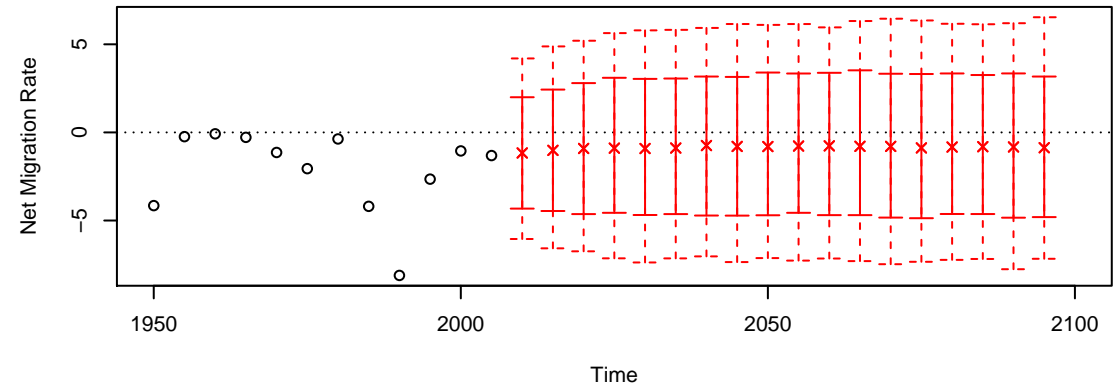

**Czech Republic Rates**

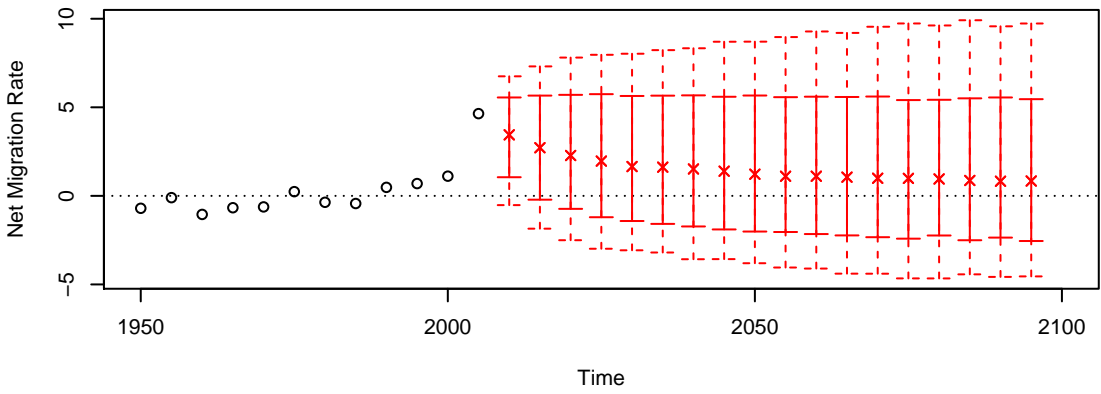

**Hungary Rates**

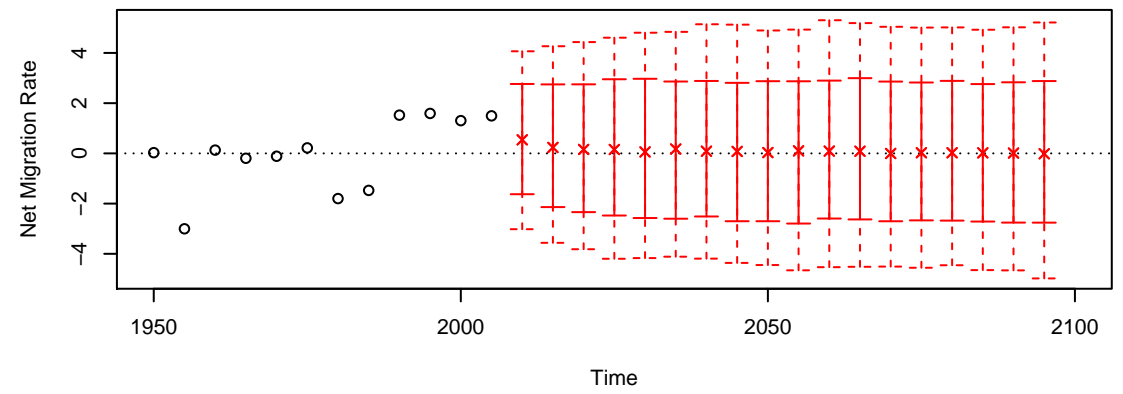

**Poland Rates**

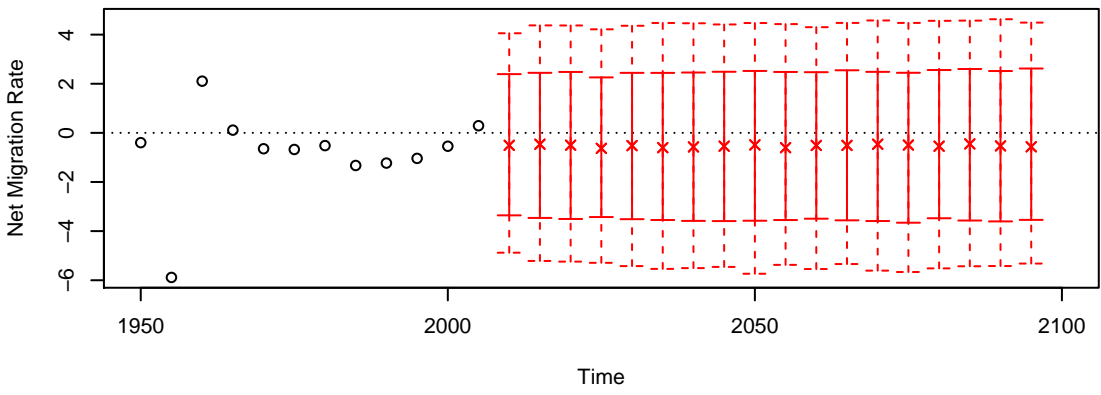

**Republic of Moldova Rates**

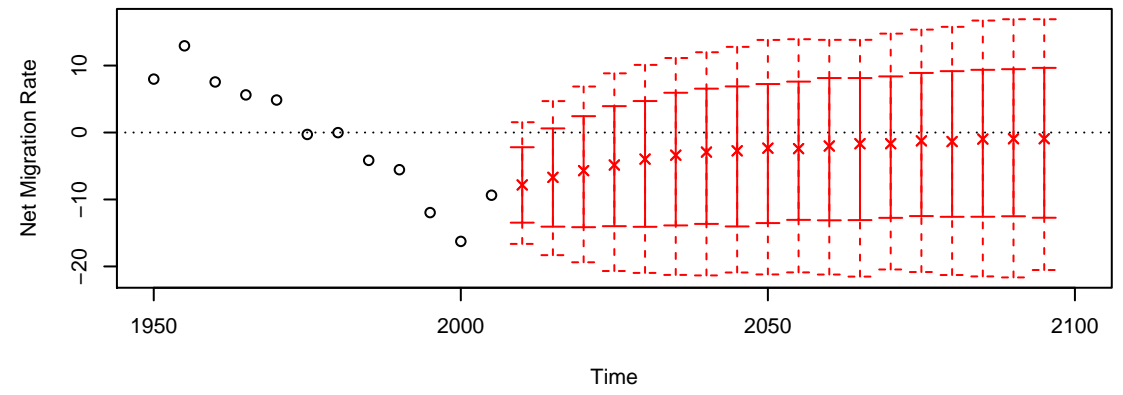

**Romania Rates**

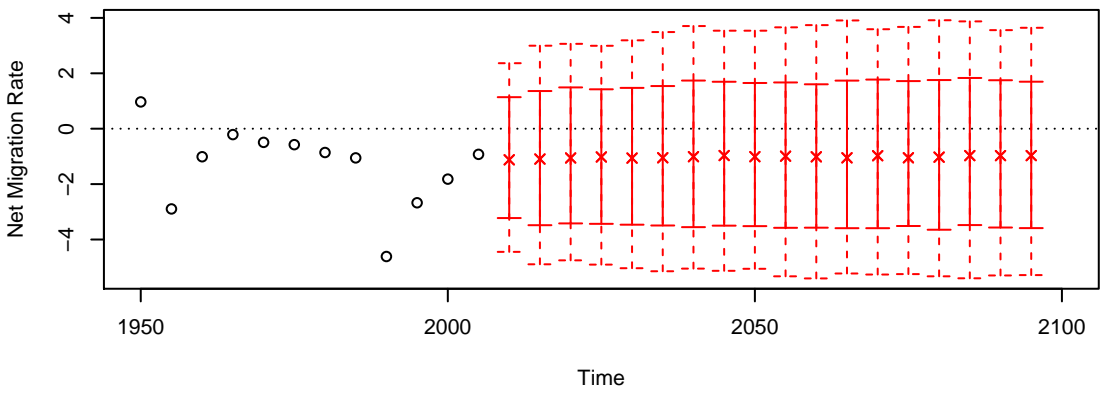

**Russian Federation Rates**

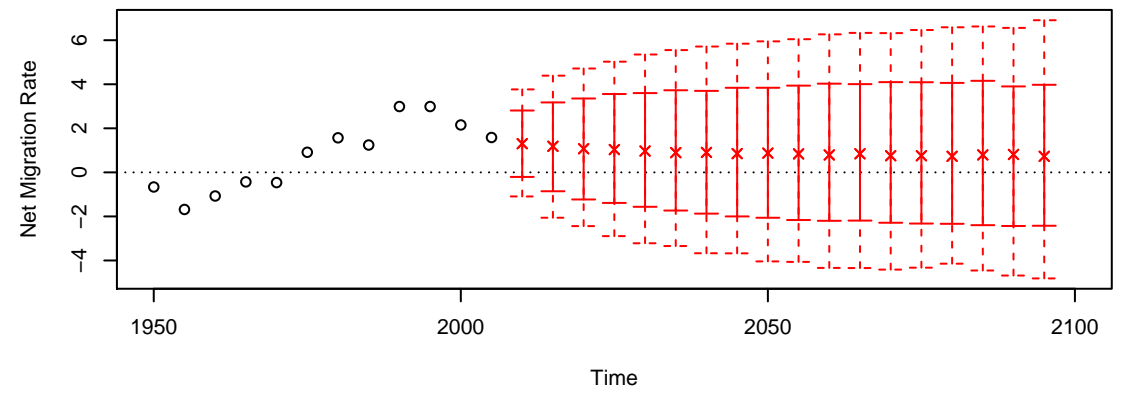

**Slovakia Rates**

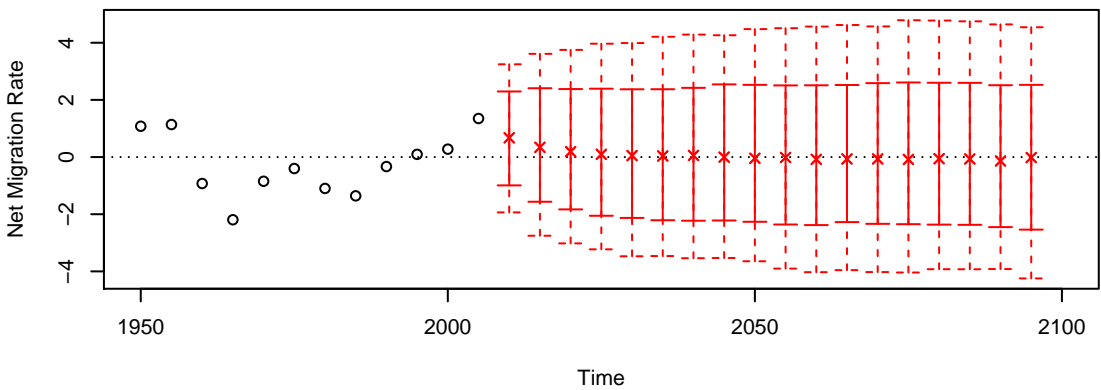

**Ukraine Rates**

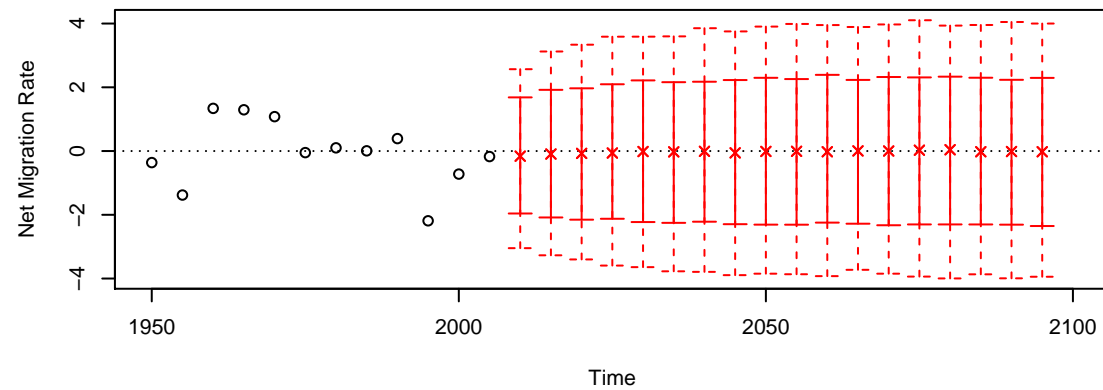

**Channel Islands Rates**

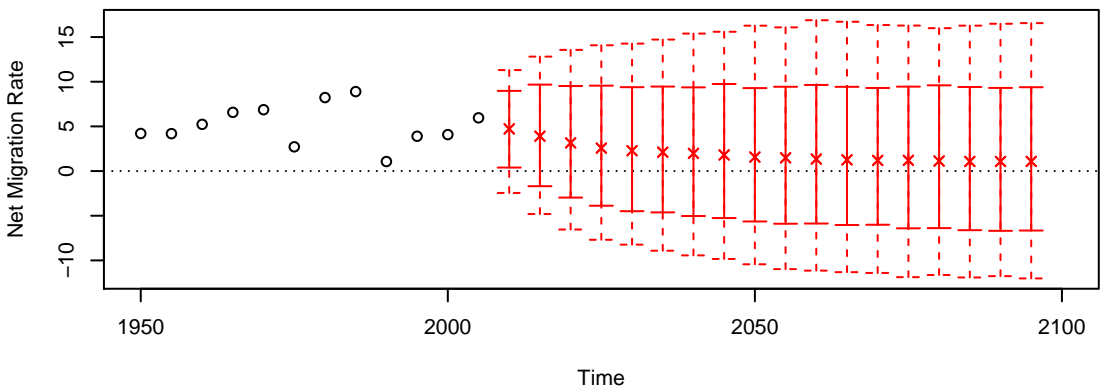

**Denmark Rates**

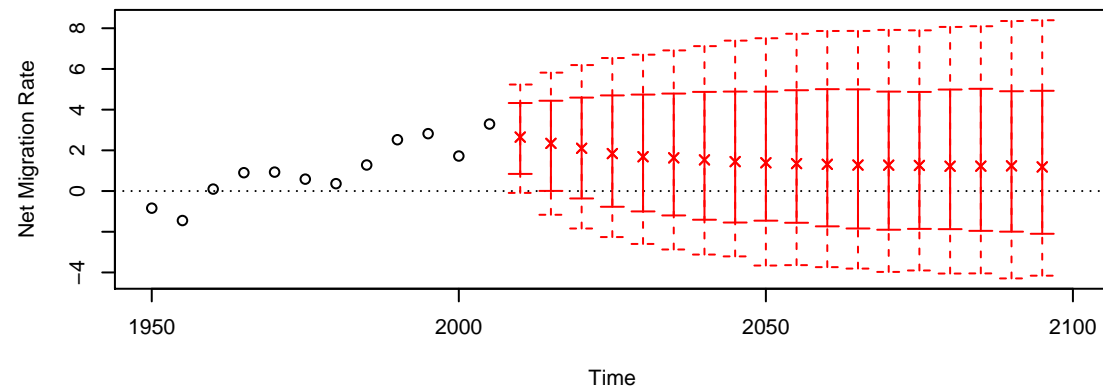

**Estonia Rates**

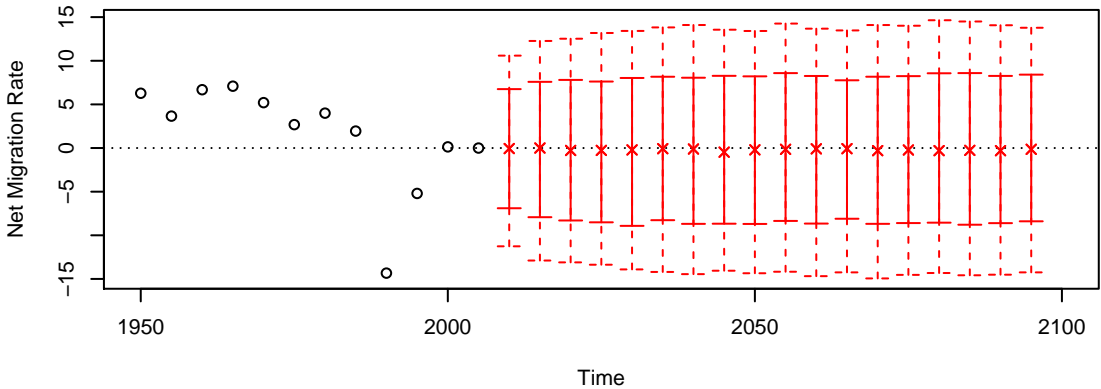

**Finland Rates**

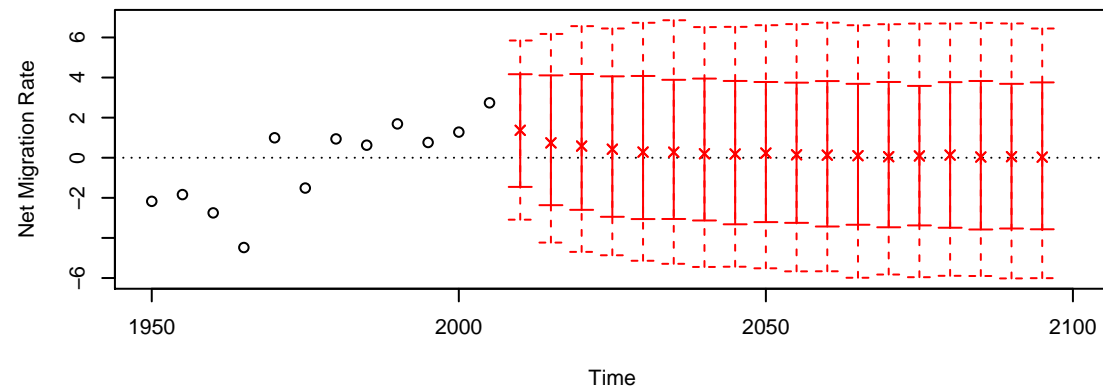

**Iceland Rates**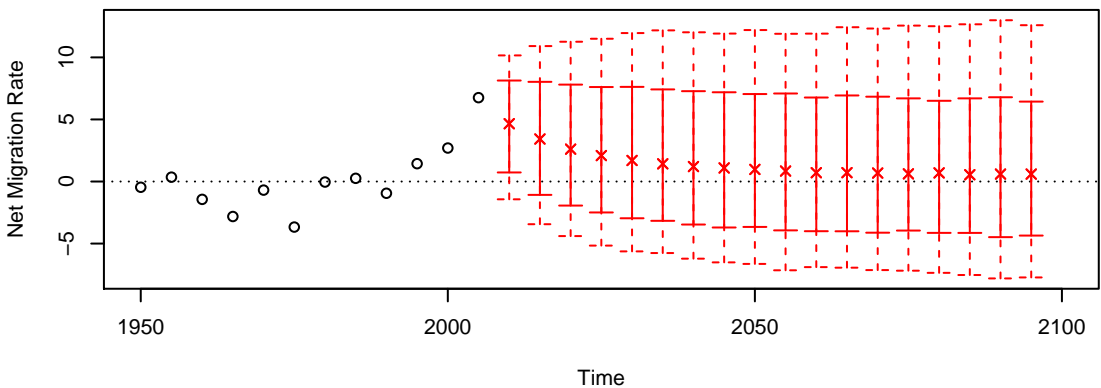**Ireland Rates**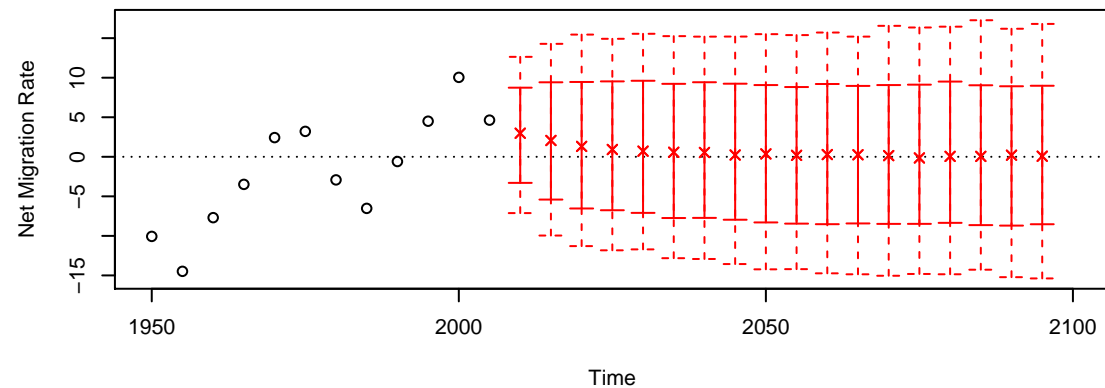**Latvia Rates**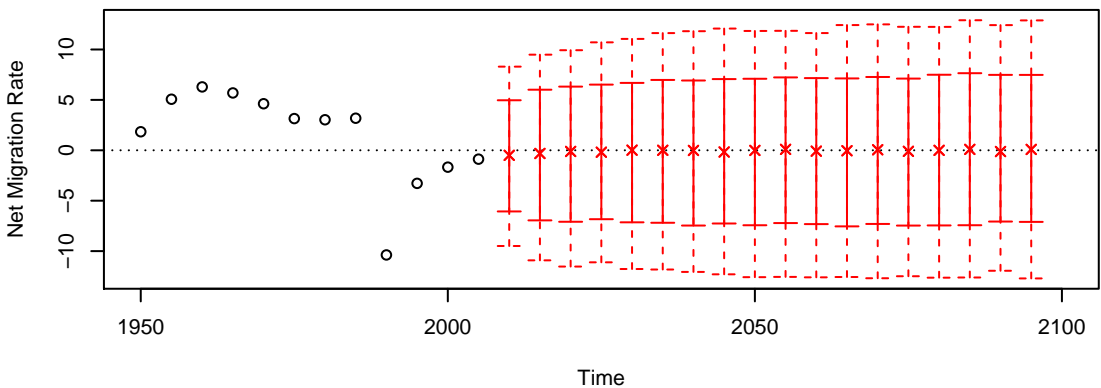**Lithuania Rates**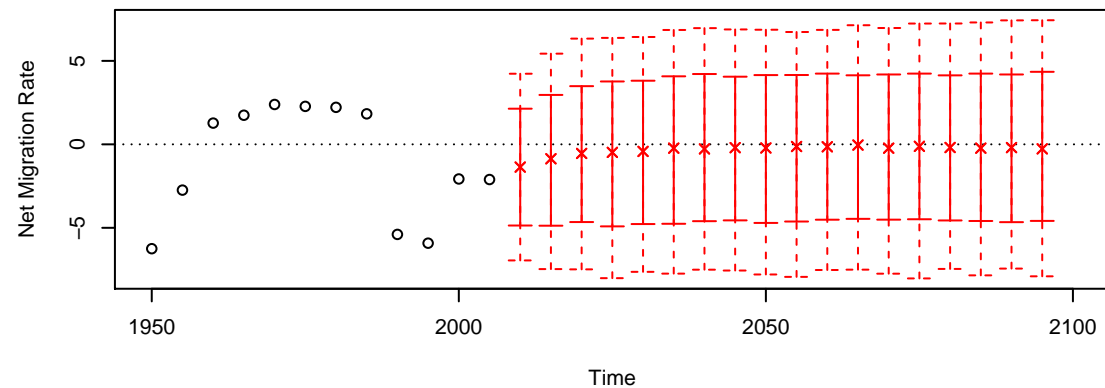**Norway Rates**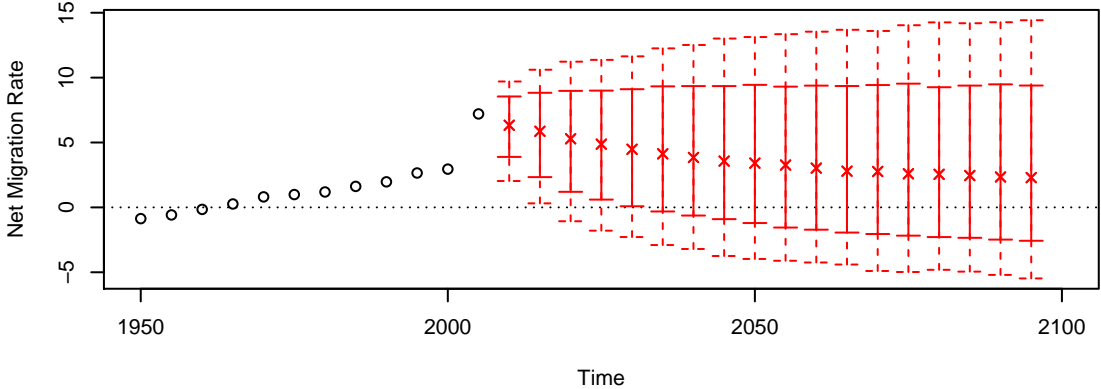**Sweden Rates**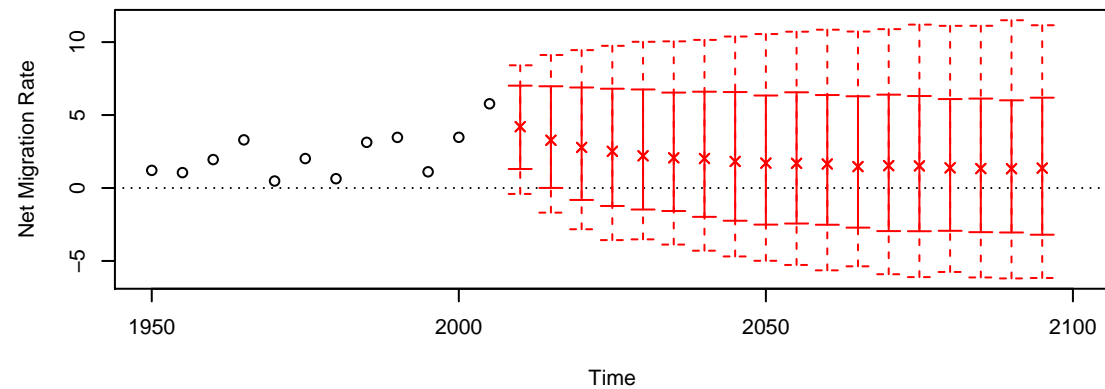

**United Kingdom Rates**

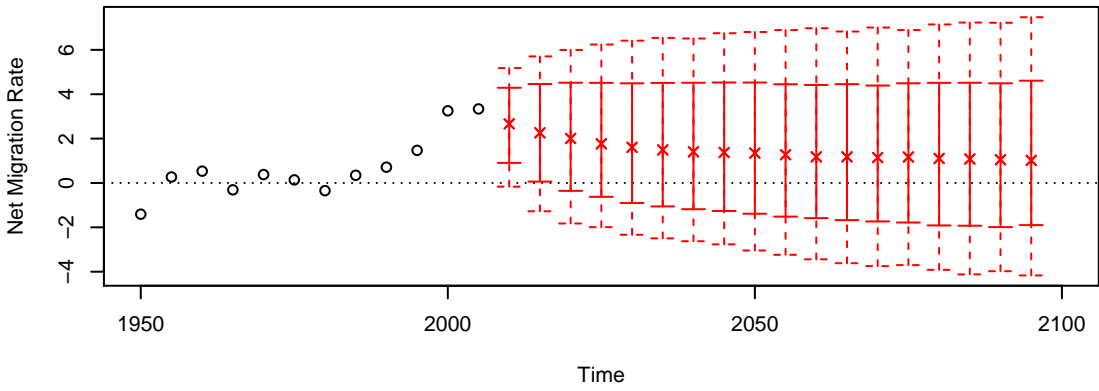

**Albania Rates**

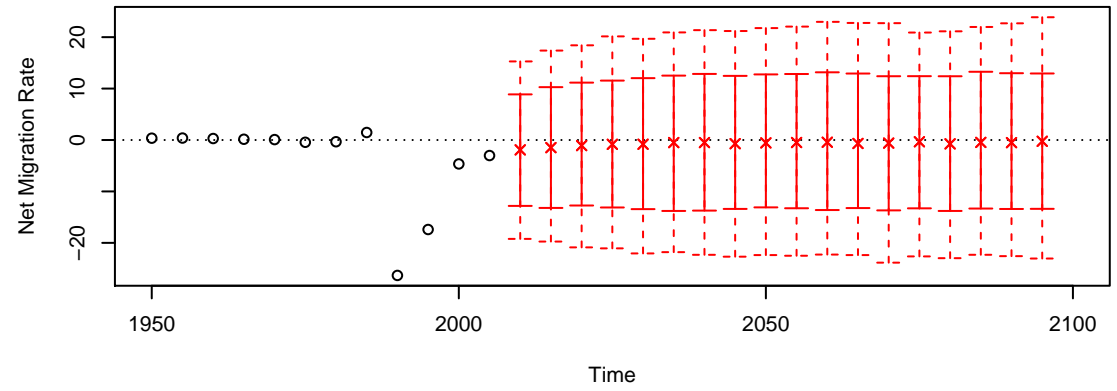

**Bosnia and Herzegovina Rates**

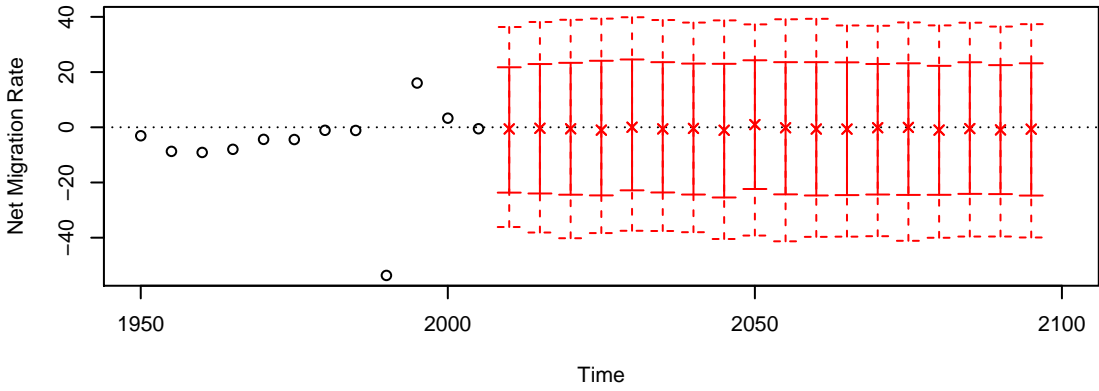

**Croatia Rates**

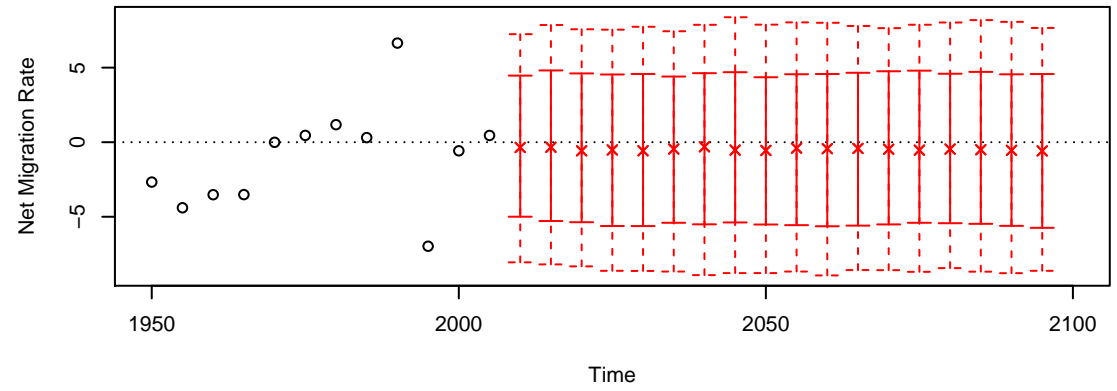

**Greece Rates**

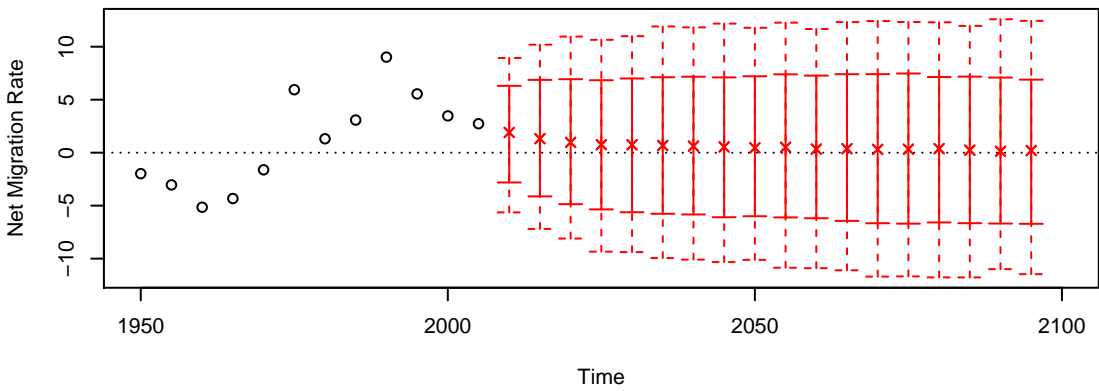

**Italy Rates**

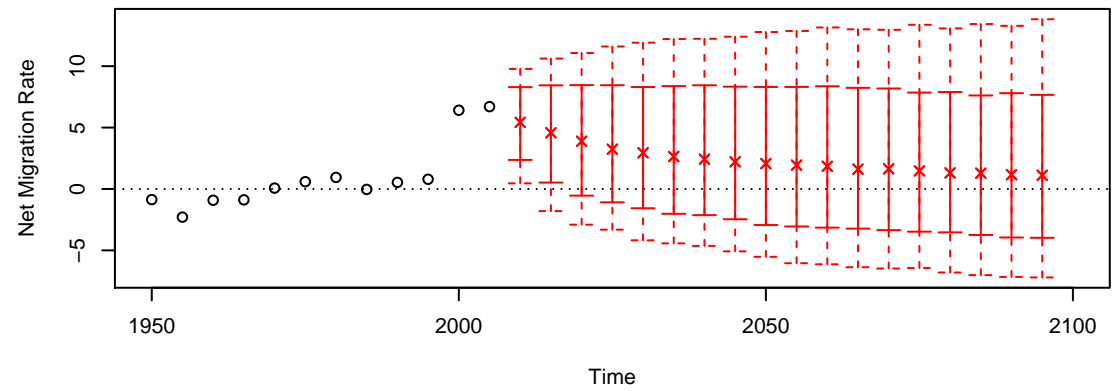

**Malta Rates**

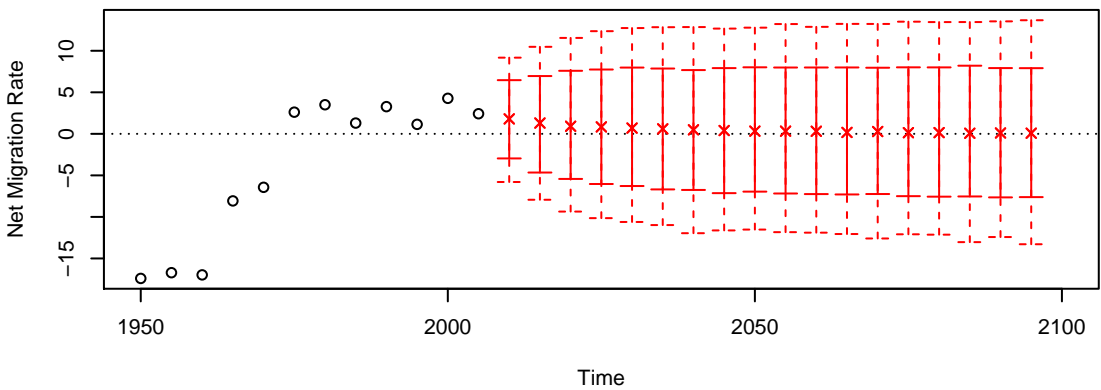

**Montenegro Rates**

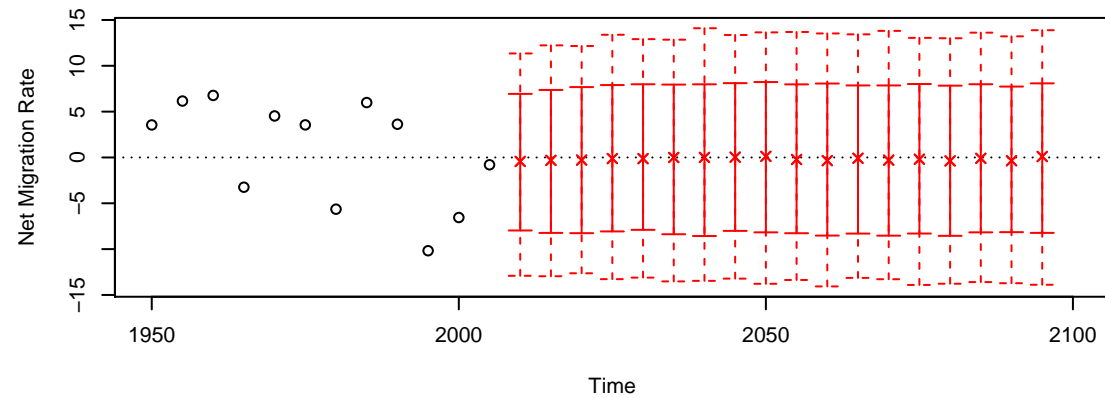

**Portugal Rates**

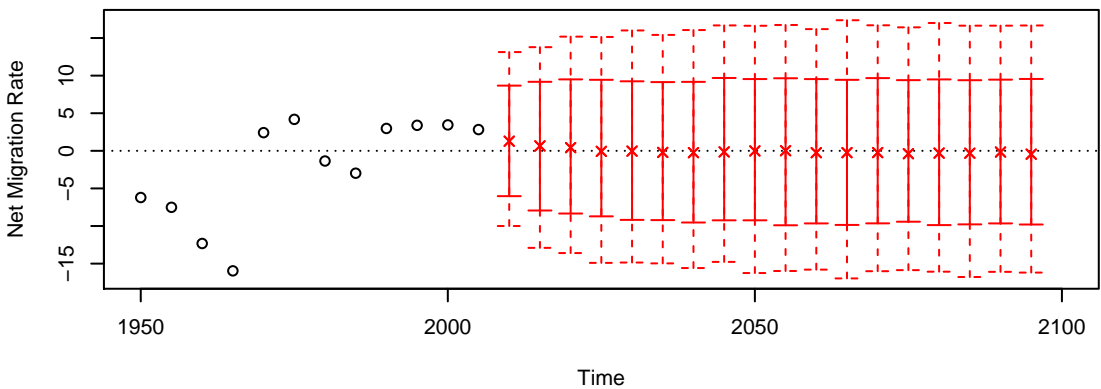

**Serbia Rates**

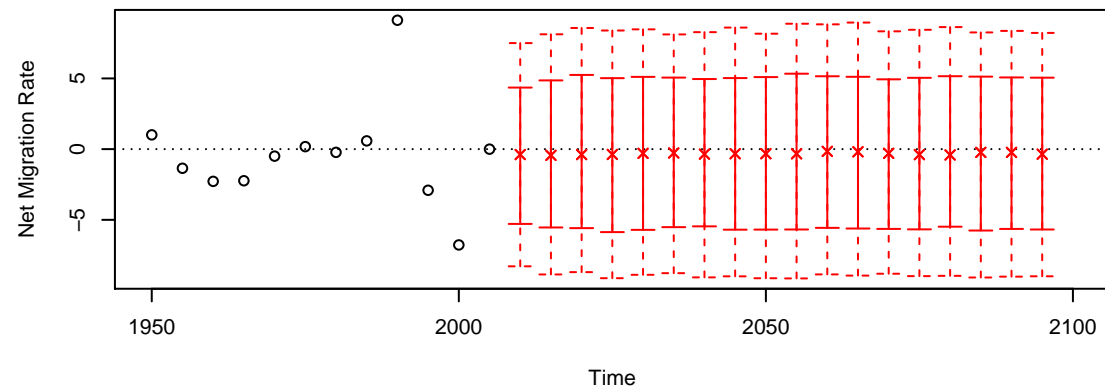

**Slovenia Rates**

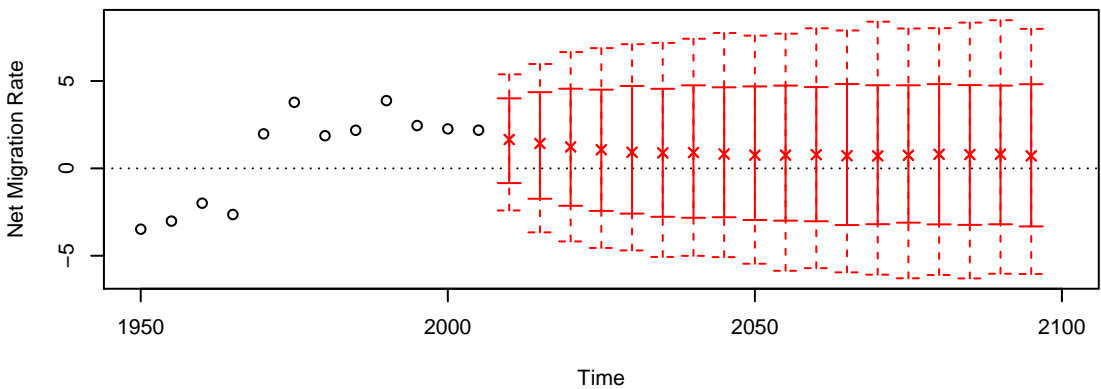

**Spain Rates**

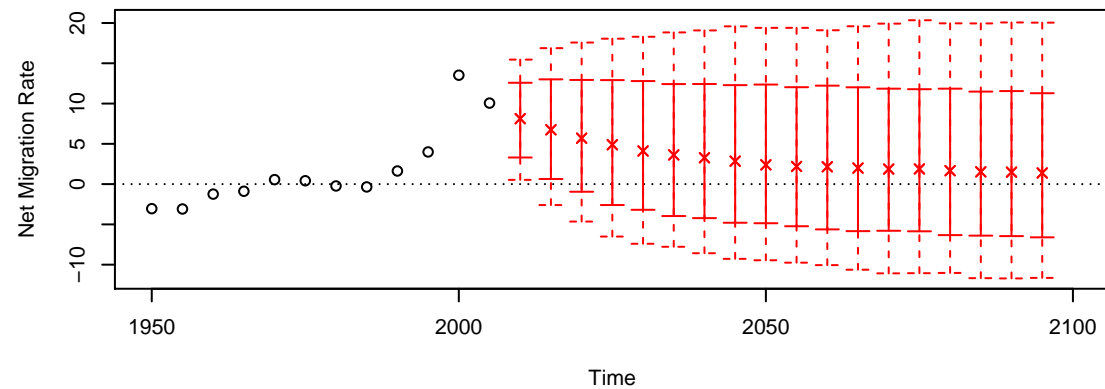

**TFYR Macedonia Rates**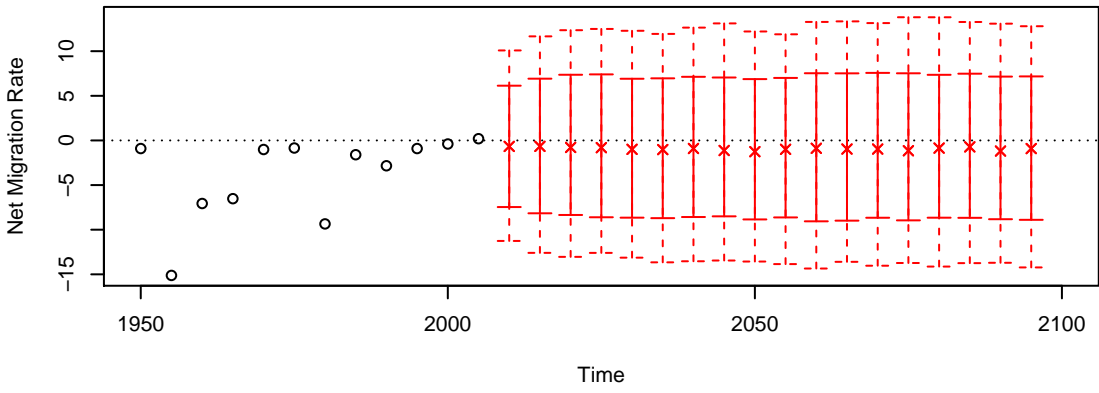**Austria Rates**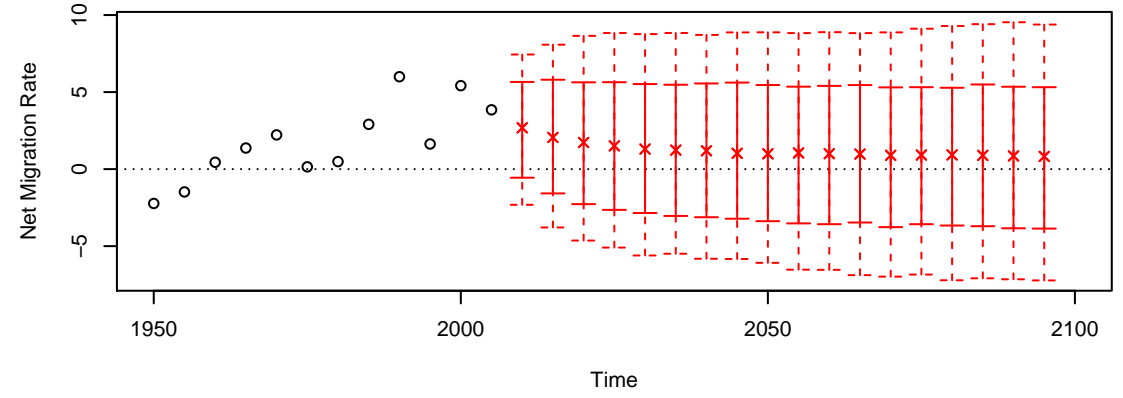**Belgium Rates**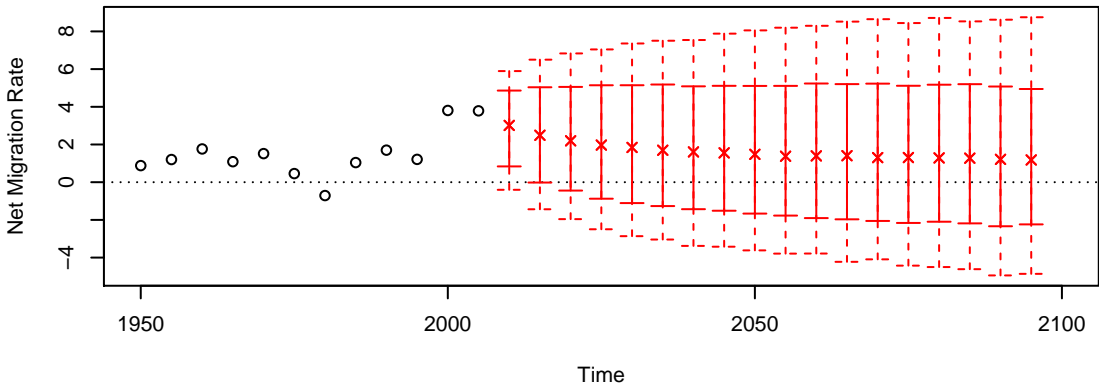**France Rates**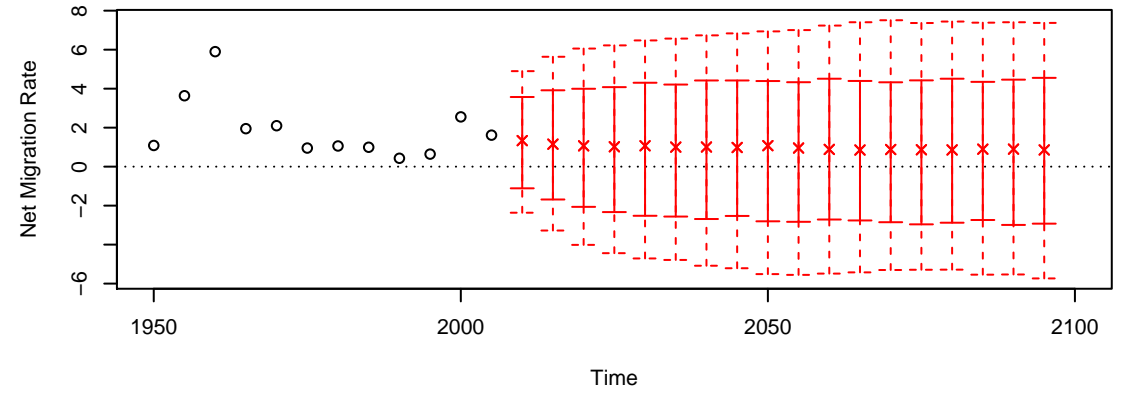**Germany Rates**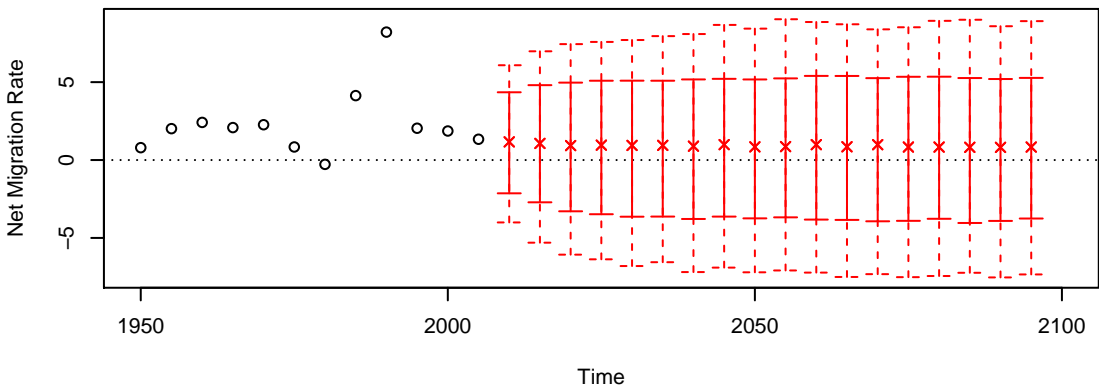**Luxembourg Rates**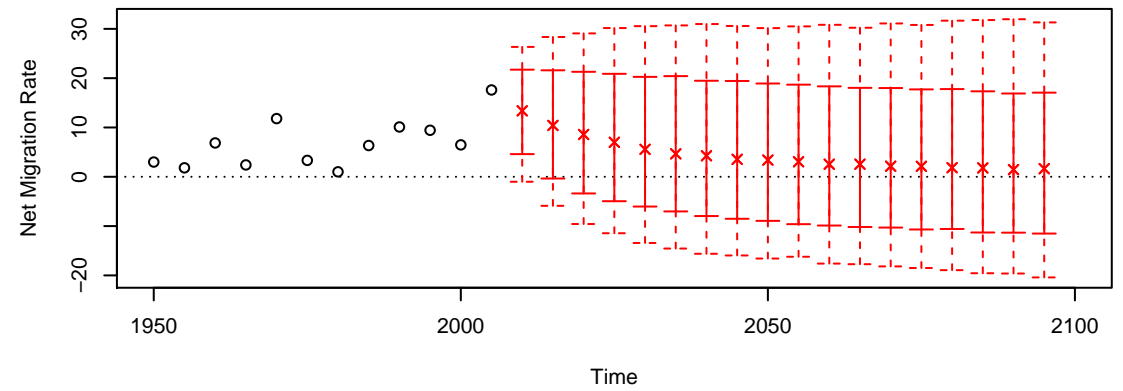



**Netherlands Rates**

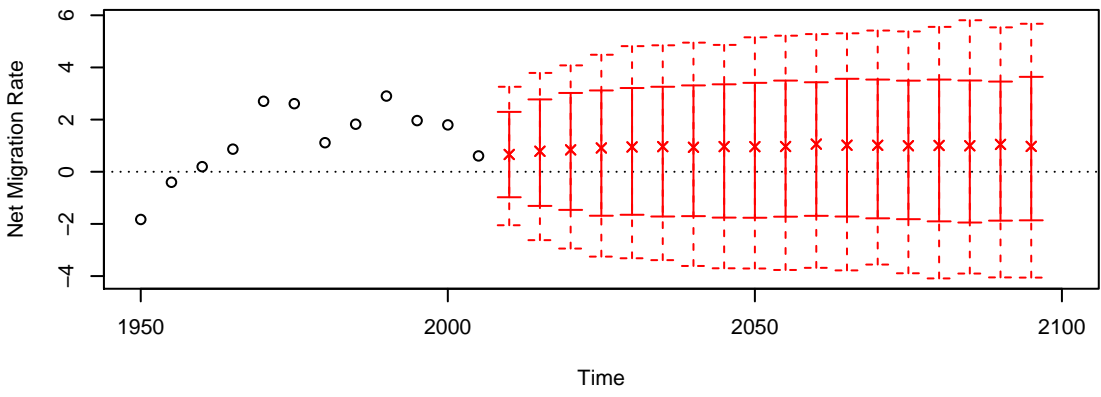

**Switzerland Rates**

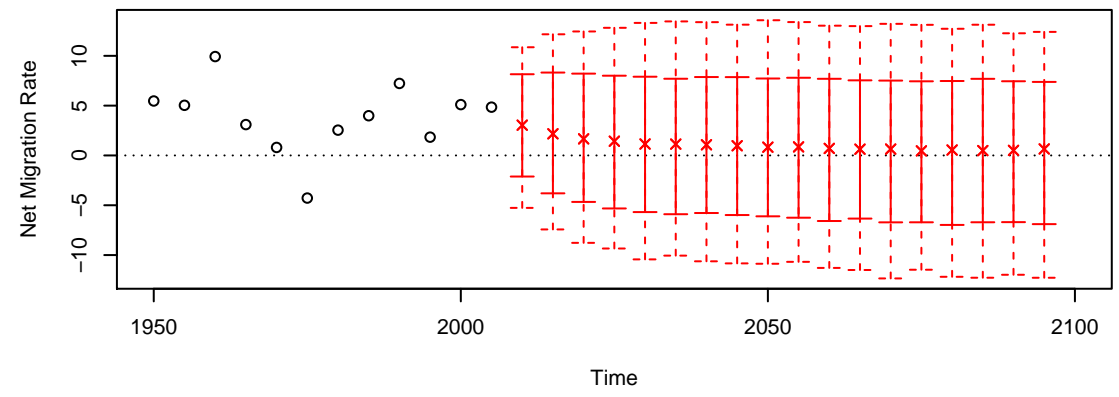

**Aruba Rates**

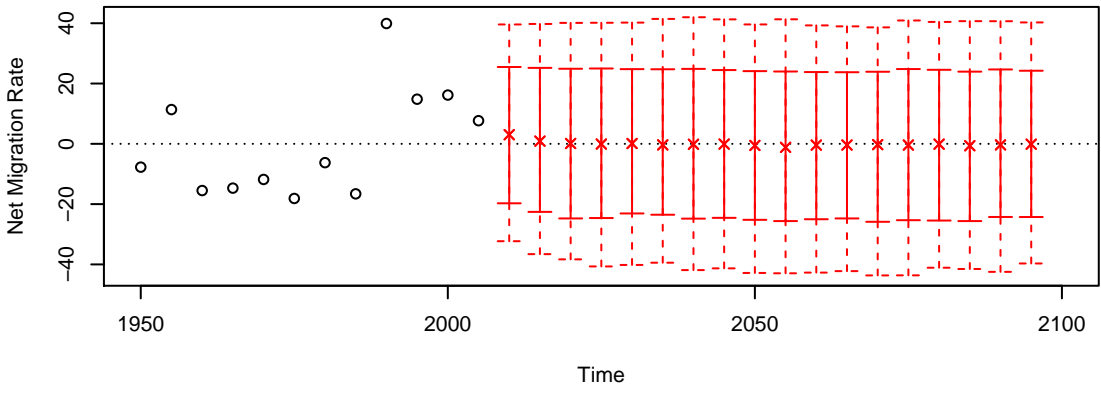

**Bahamas Rates**

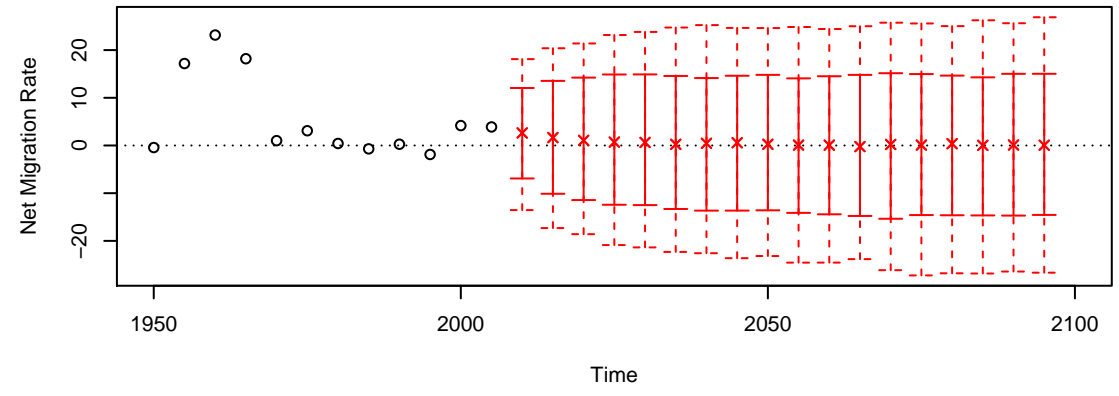

**Barbados Rates**

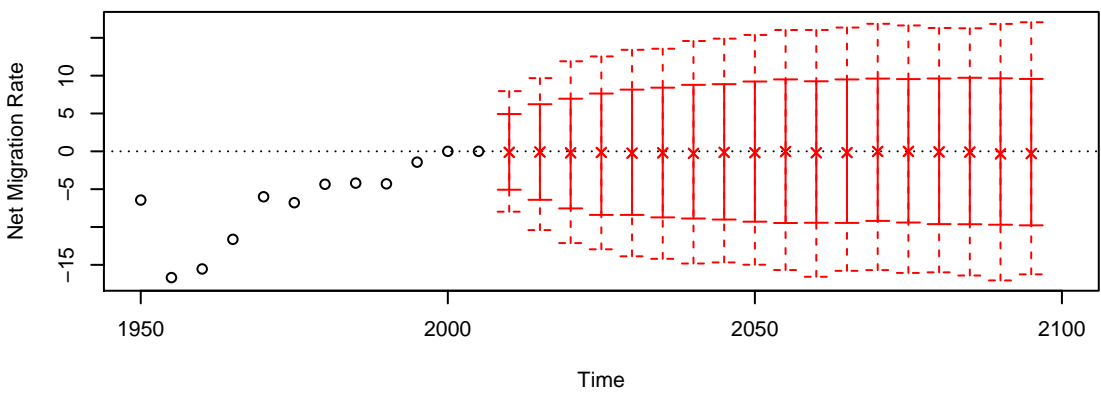

**Cuba Rates**

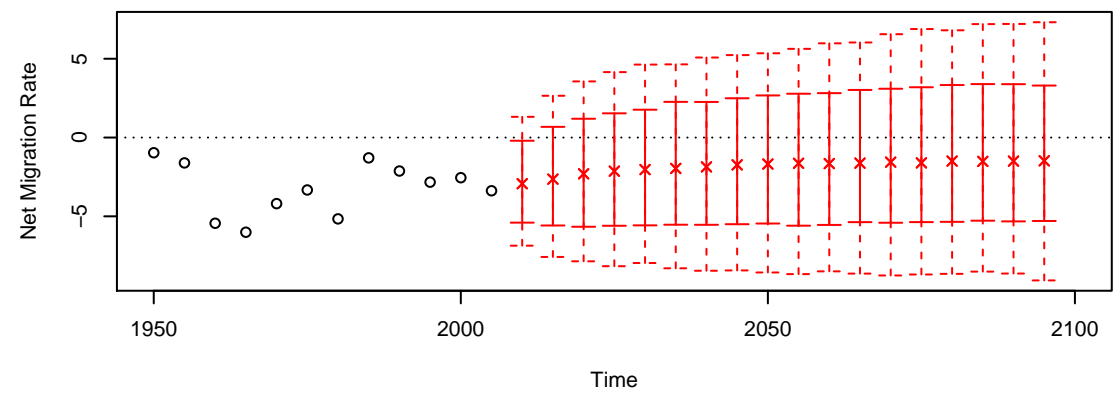

**Dominican Republic Rates**

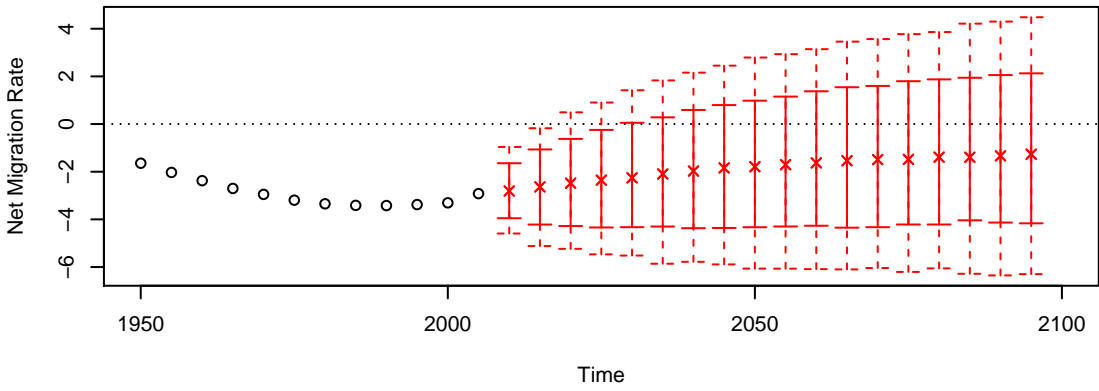

**Grenada Rates**

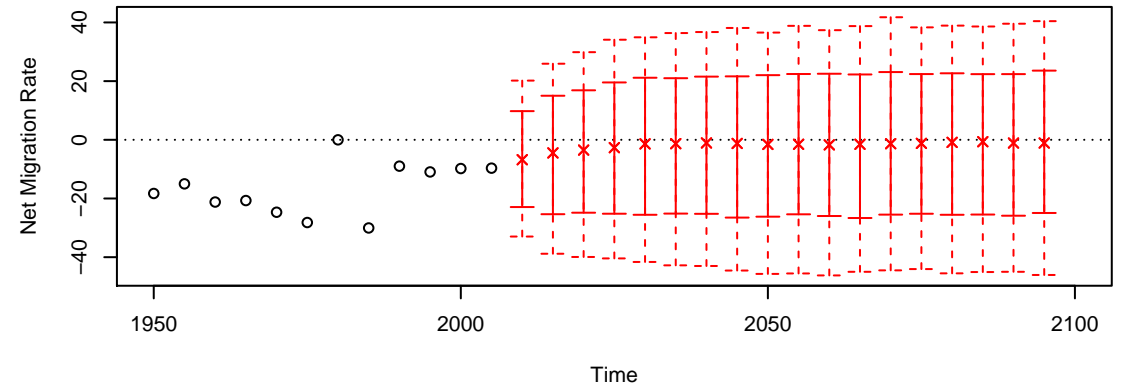

**Guadeloupe Rates**

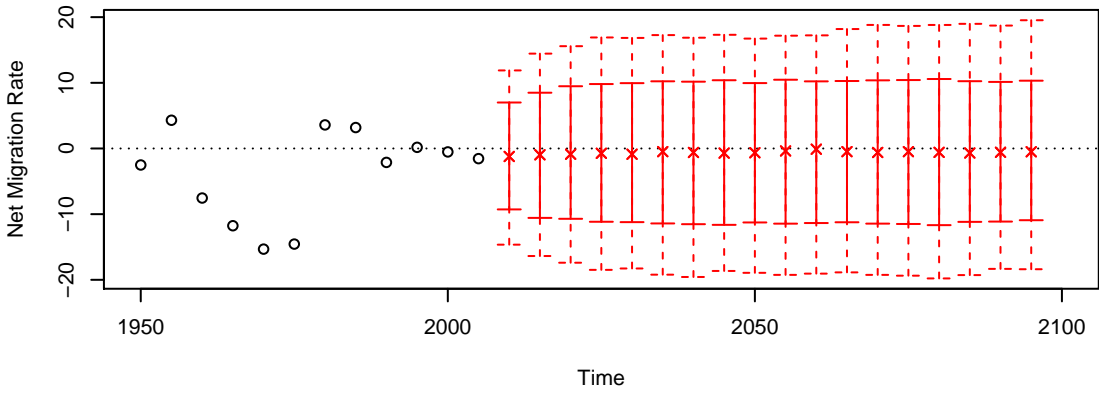

**Haiti Rates**

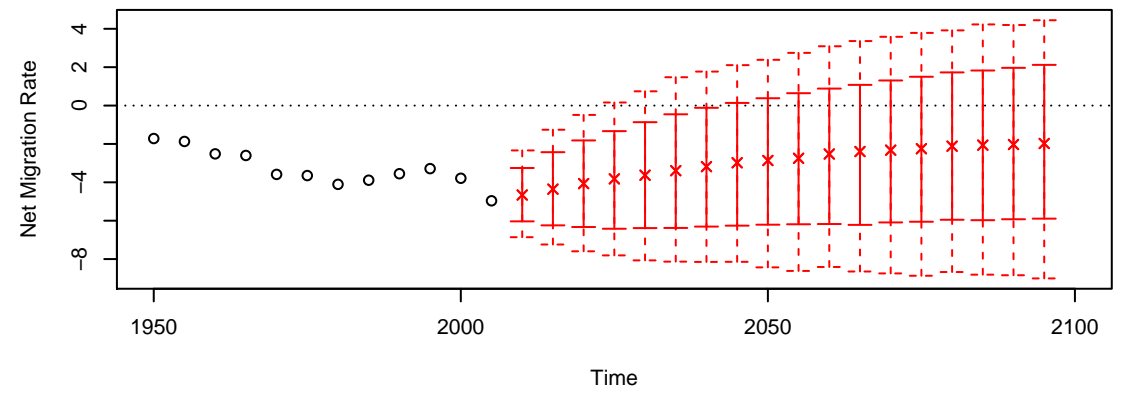

**Jamaica Rates**

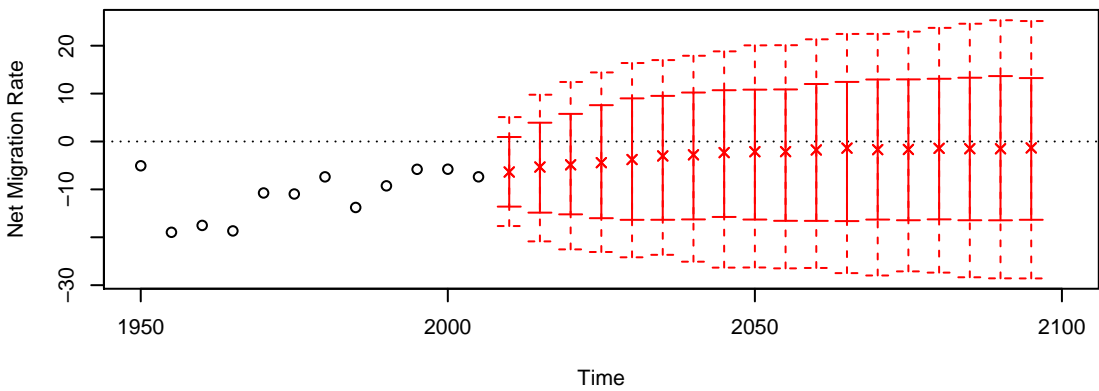

**Martinique Rates**

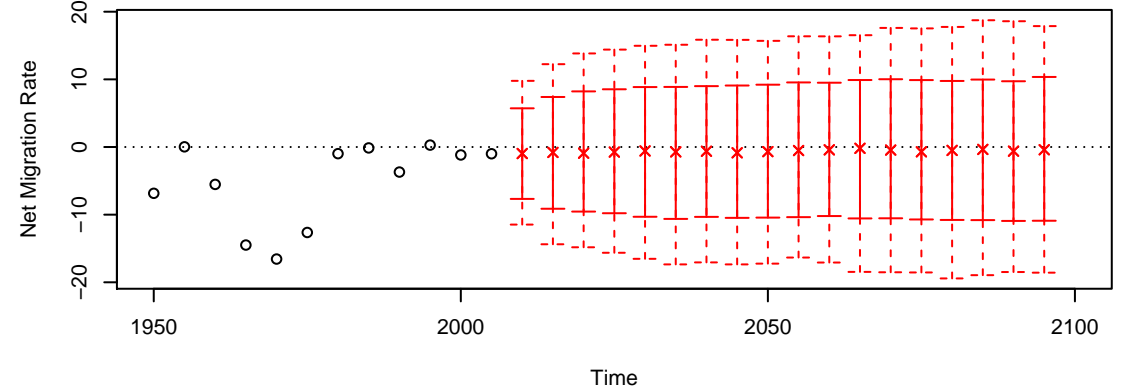

**Netherlands Antilles Rates**

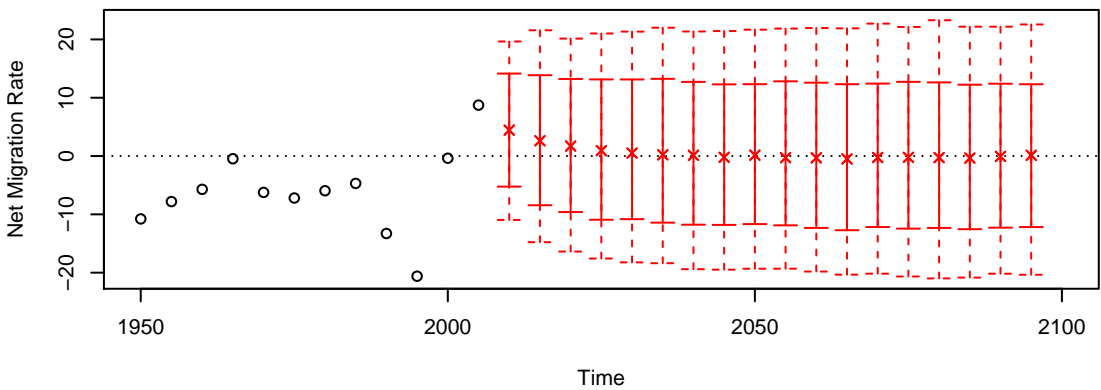

**Puerto Rico Rates**

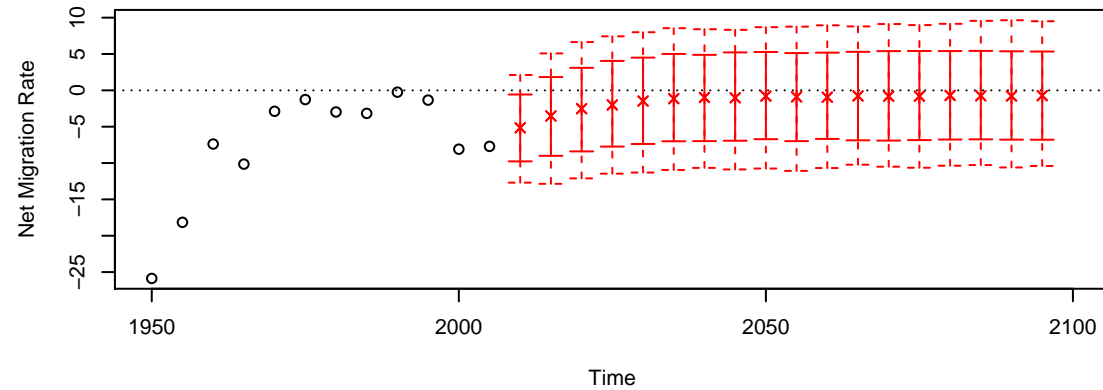

**Saint Lucia Rates**

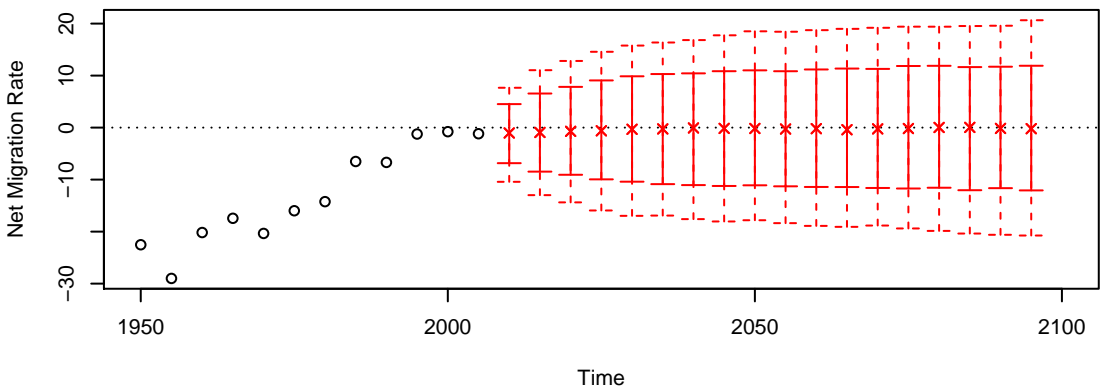

**Saint Vincent and the Grenadines Rates**

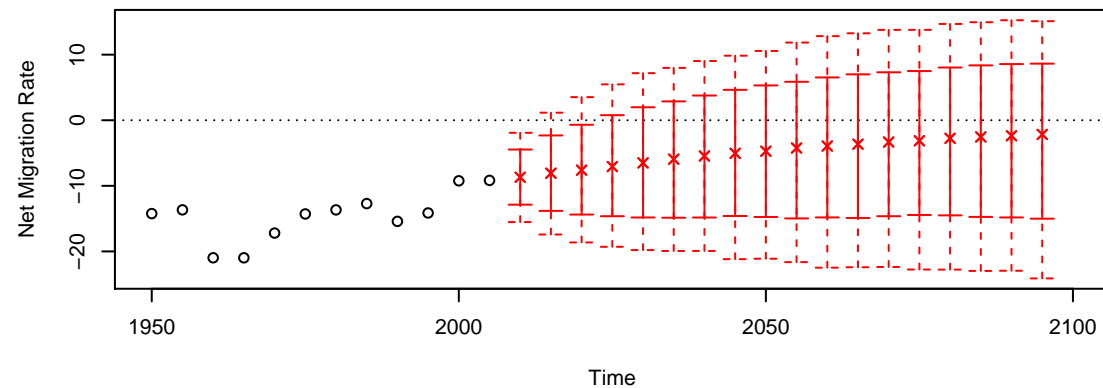

**Trinidad and Tobago Rates**

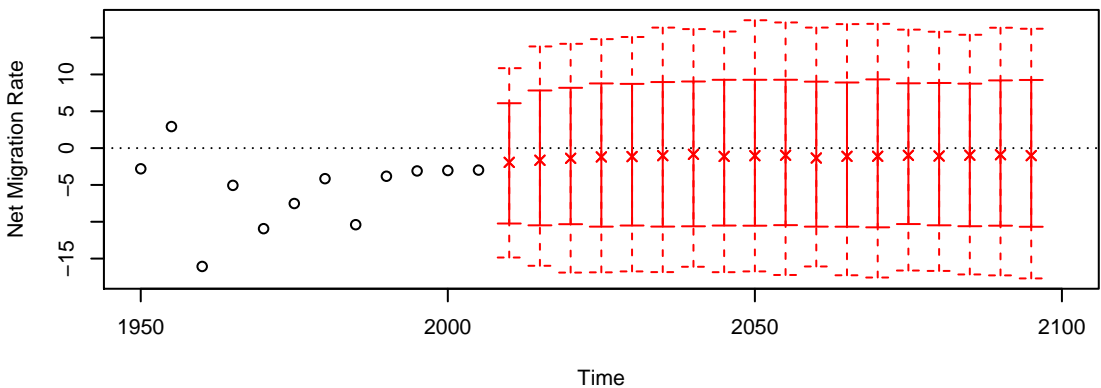

**United States Virgin Islands Rates**

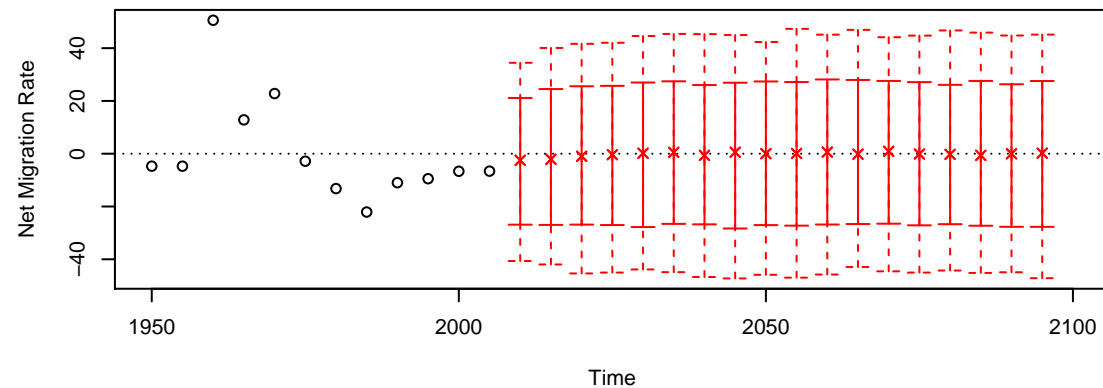

**Belize Rates**

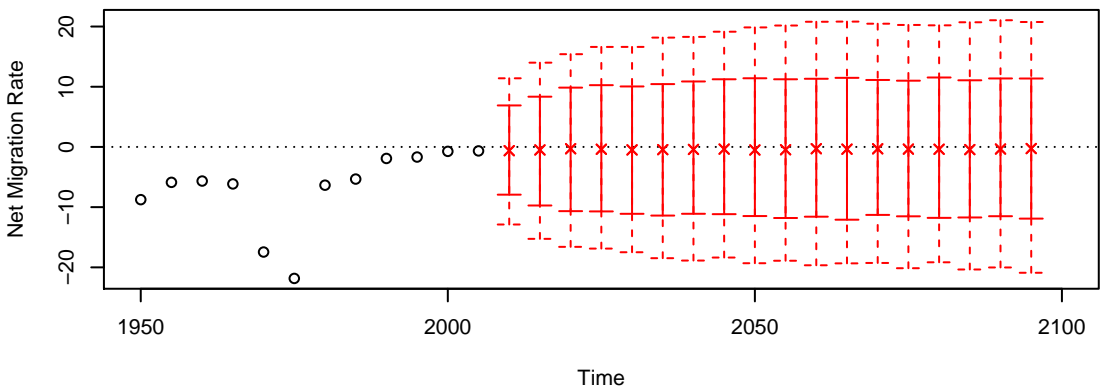

**Costa Rica Rates**

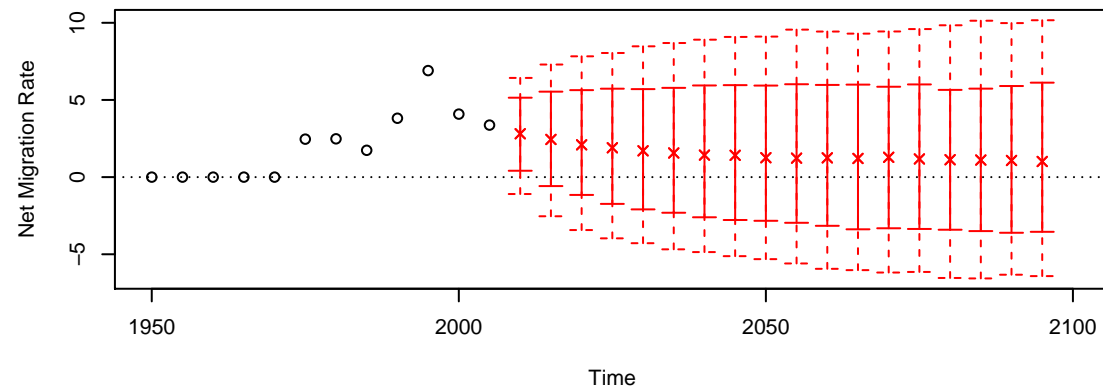

**El Salvador Rates**

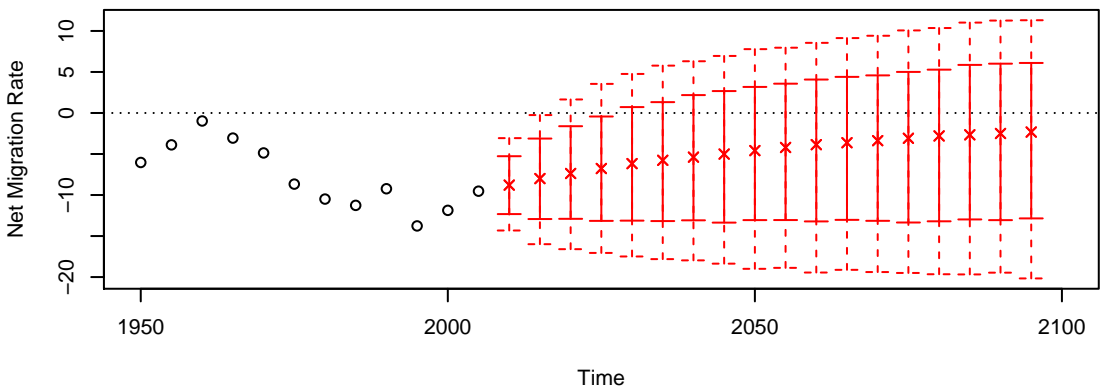

**Guatemala Rates**

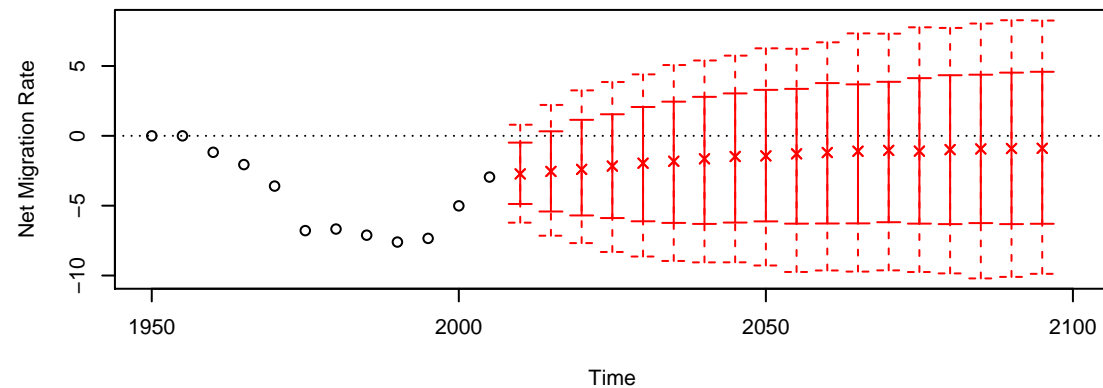

**Honduras Rates**

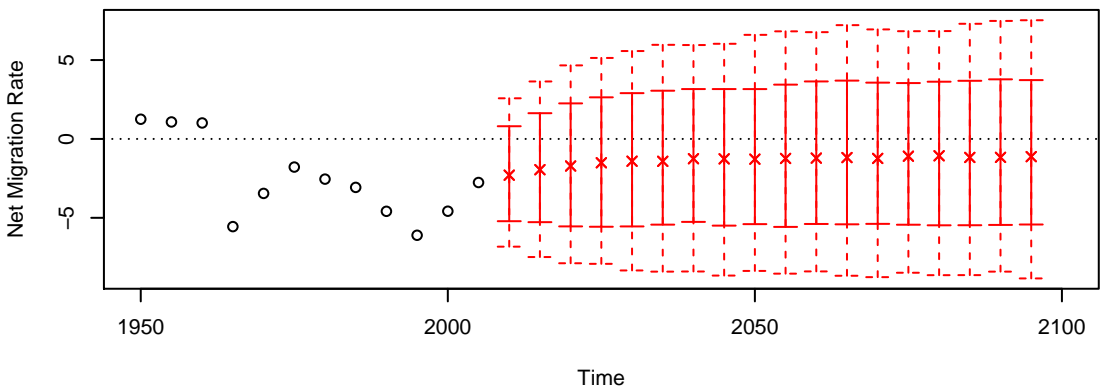

**Mexico Rates**

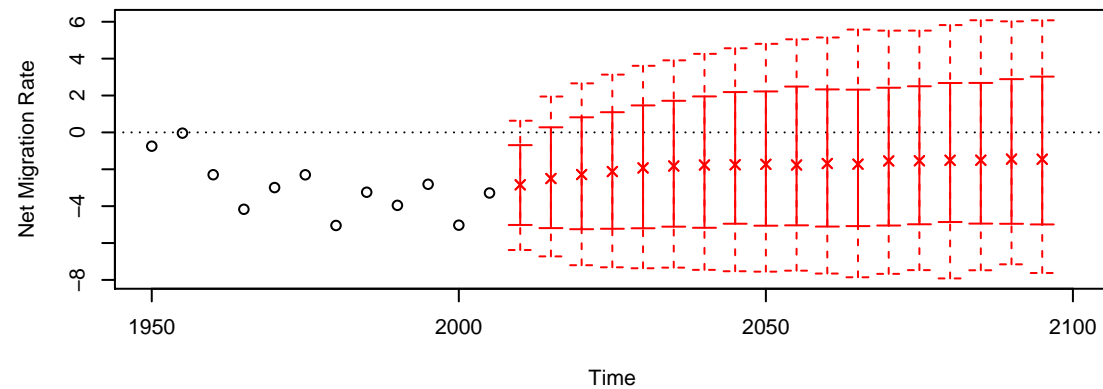

### Nicaragua Rates

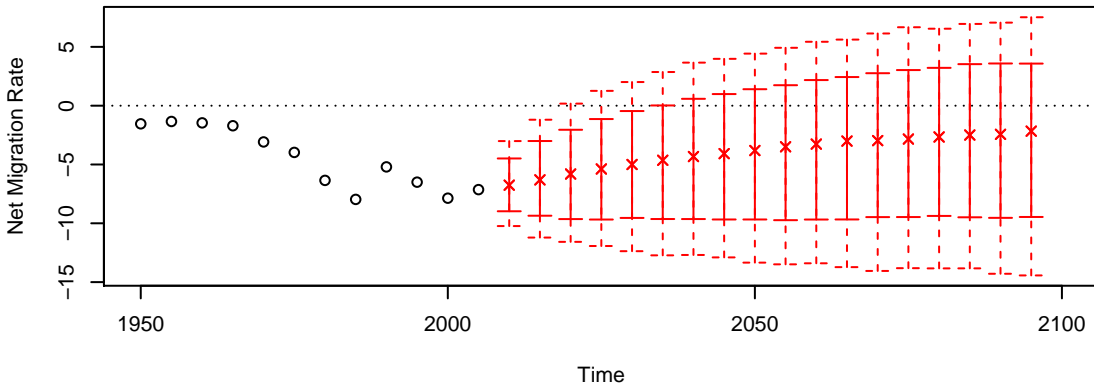

### Panama Rates

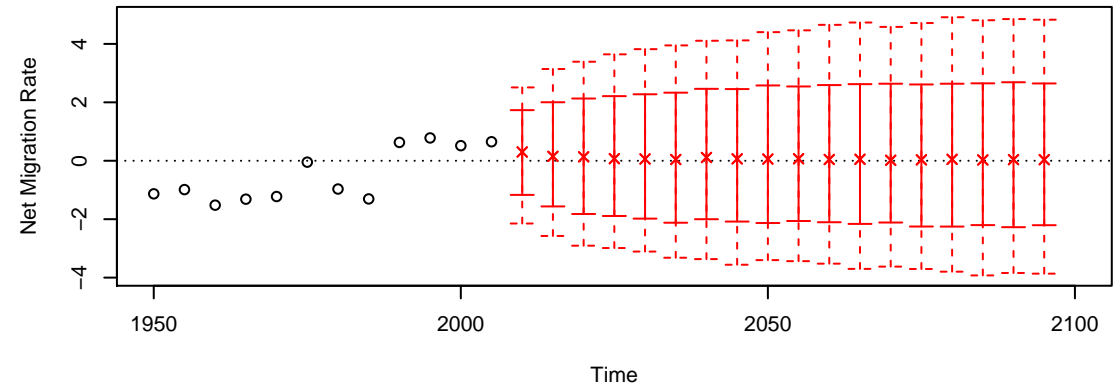

### Argentina Rates

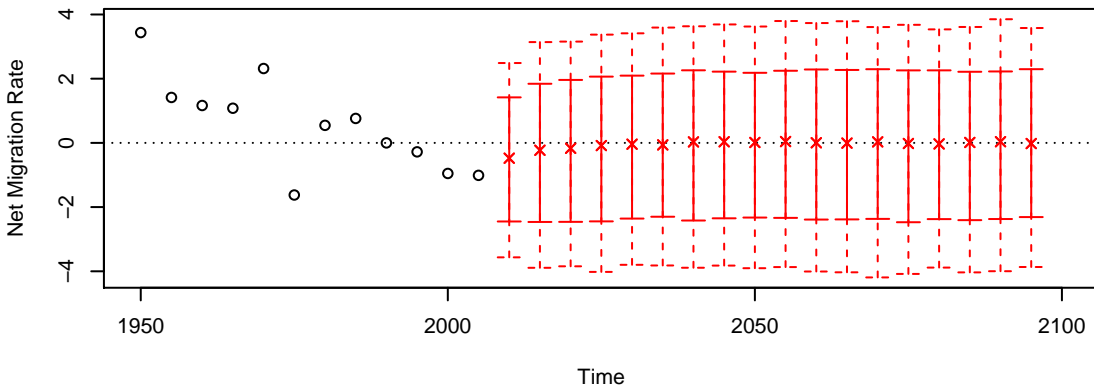

### Bolivia (Plurinational State of) Rates

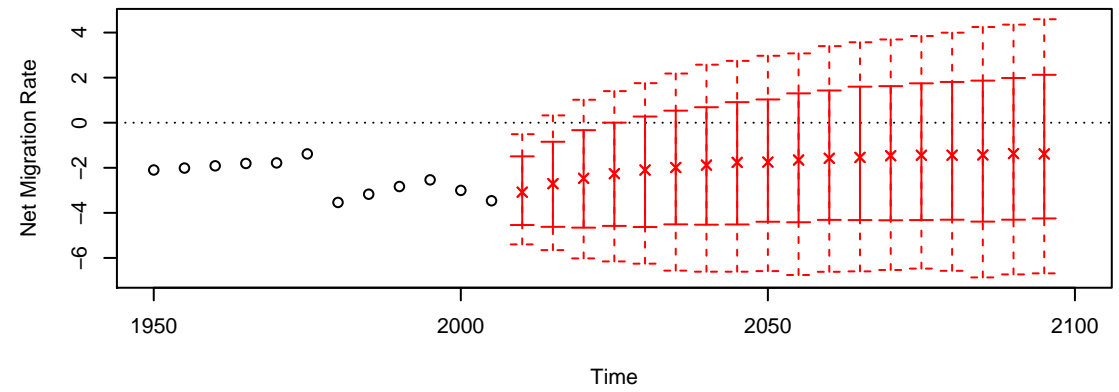

### Brazil Rates

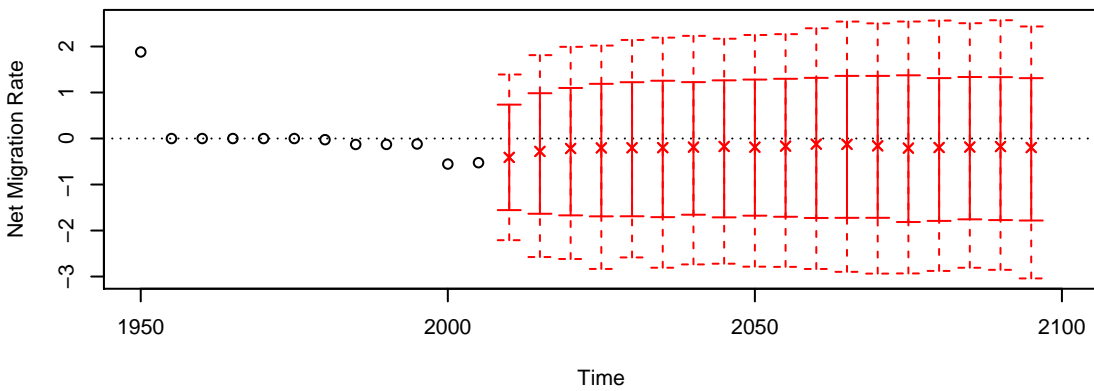

### Chile Rates

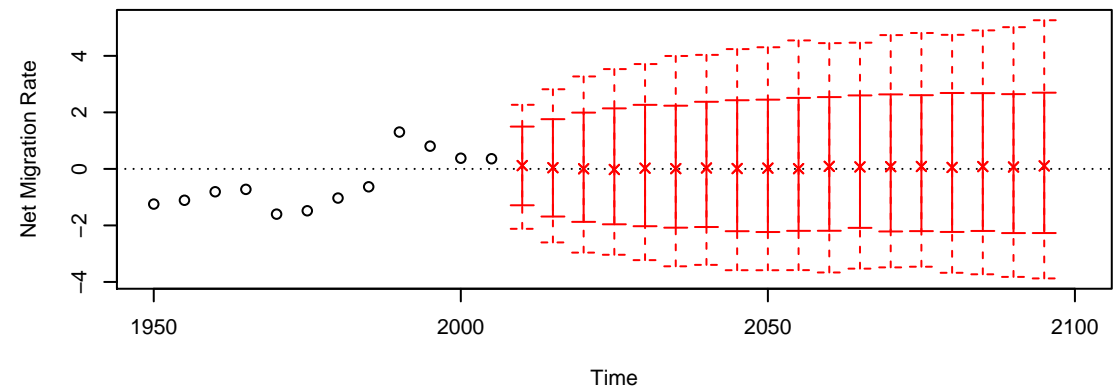

**Colombia Rates**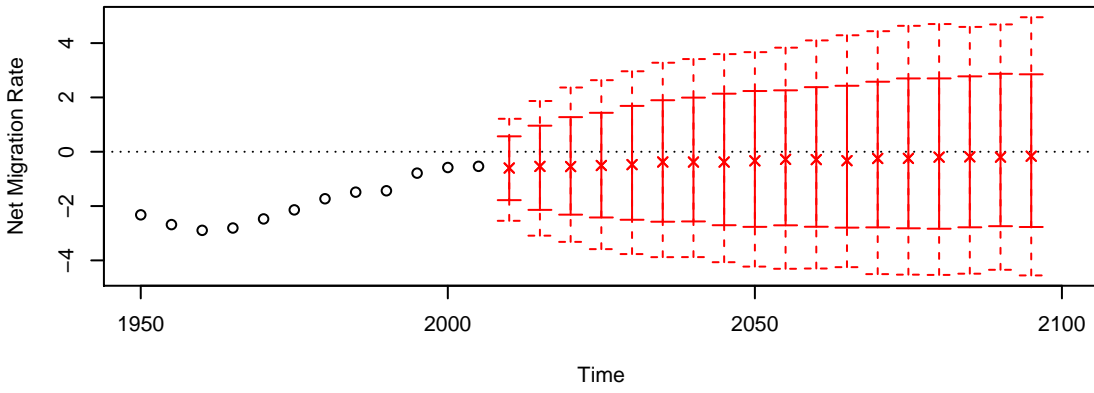**Ecuador Rates**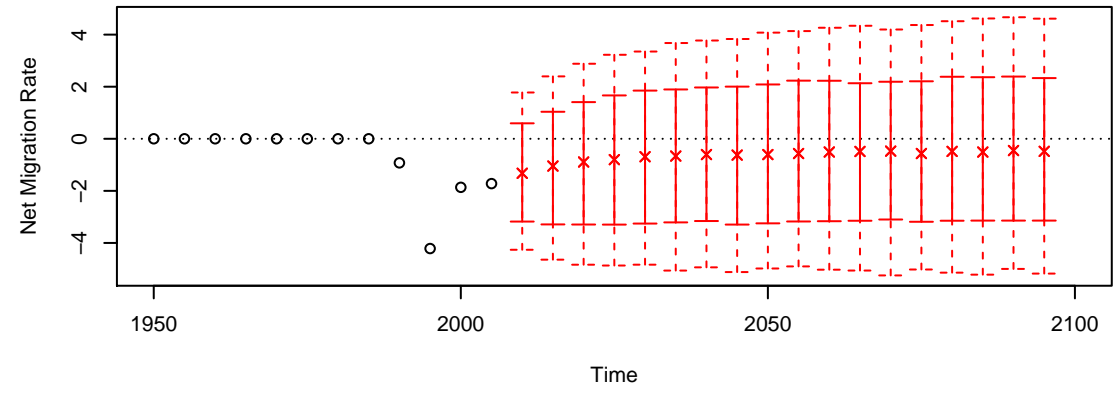**French Guiana Rates**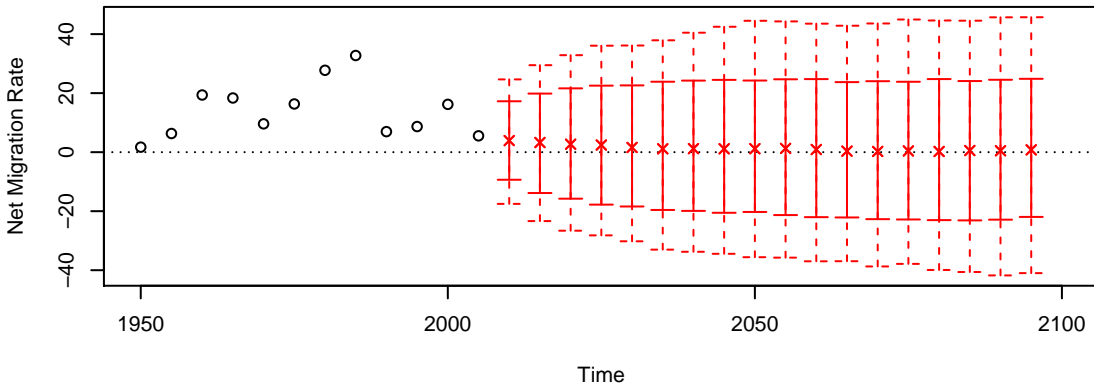**Guyana Rates**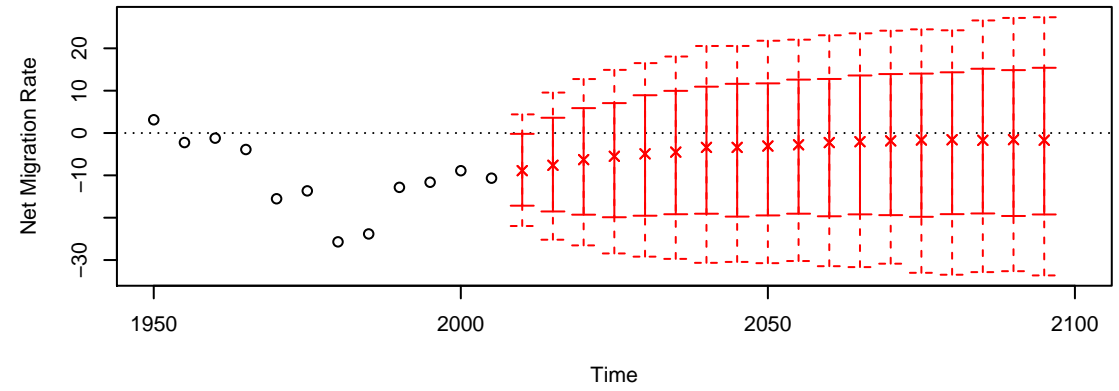**Paraguay Rates**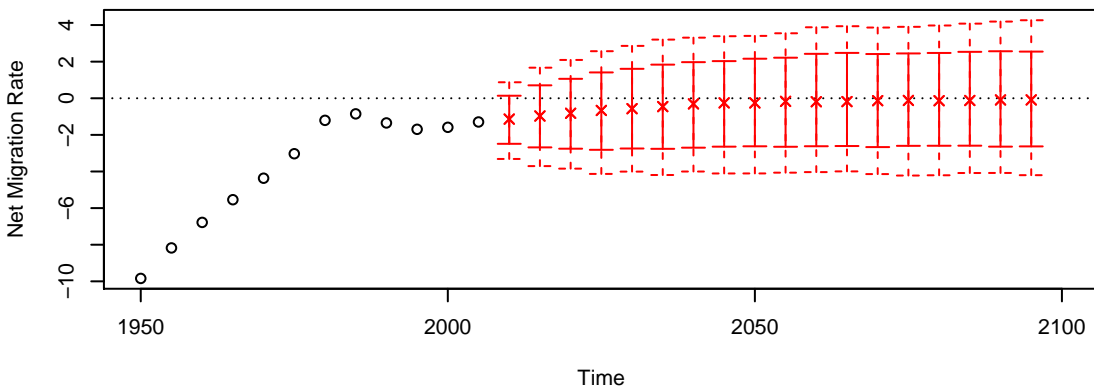**Peru Rates**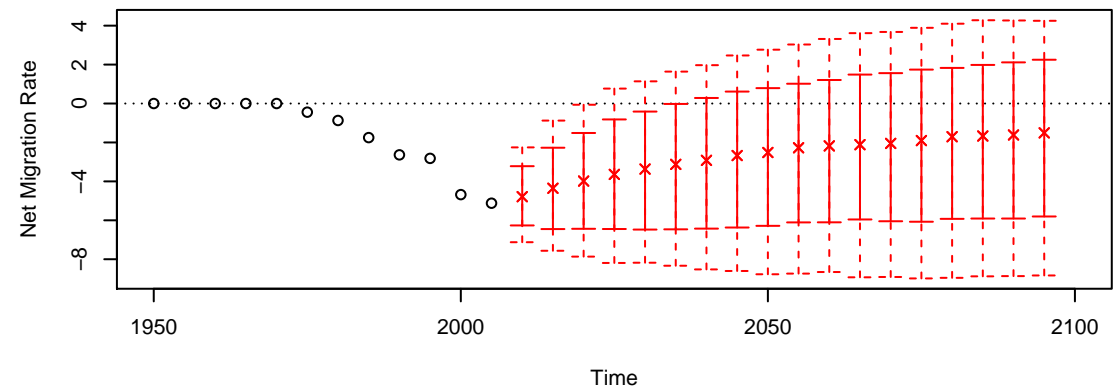

### Suriname Rates

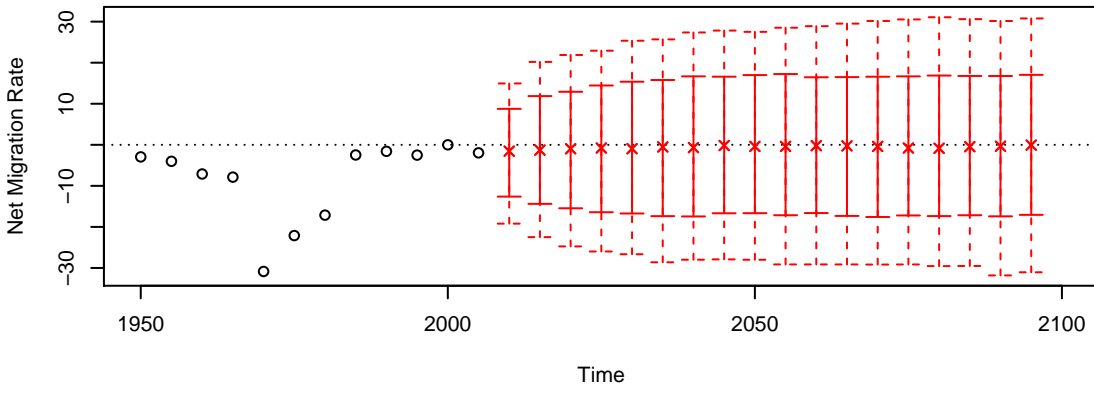

### Uruguay Rates

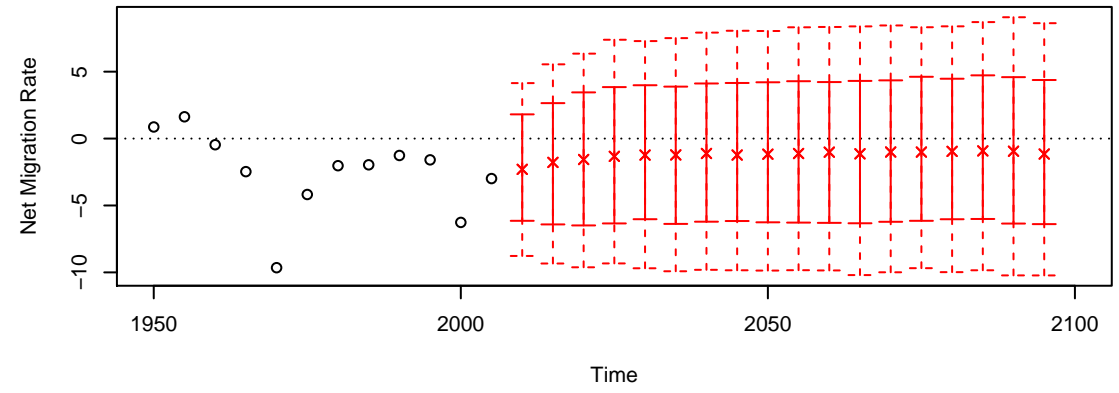

### Venezuela (Bolivarian Republic of) Rates

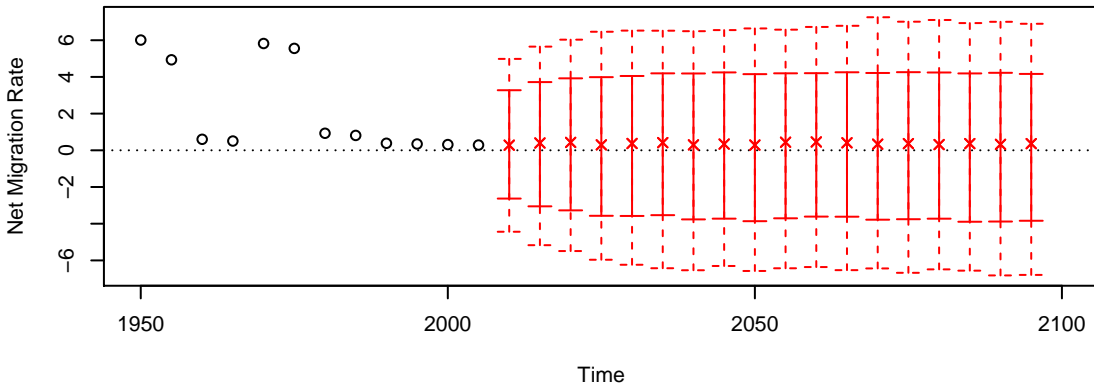

### Canada Rates

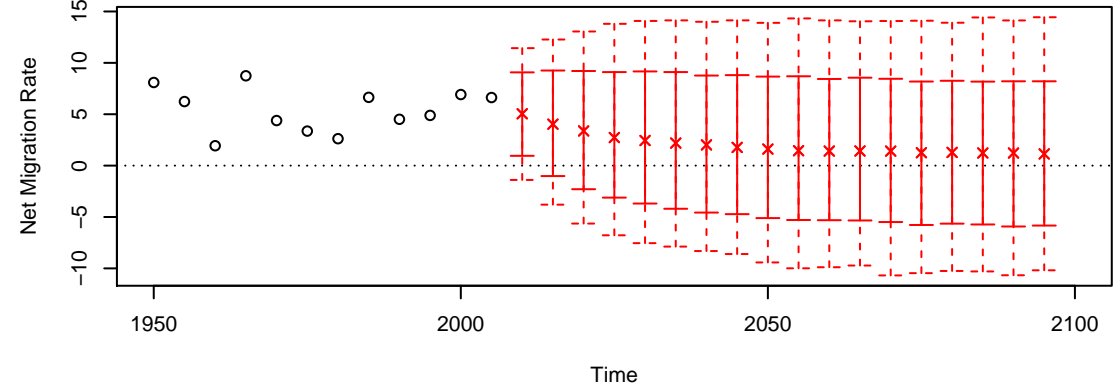

### United States of America Rates

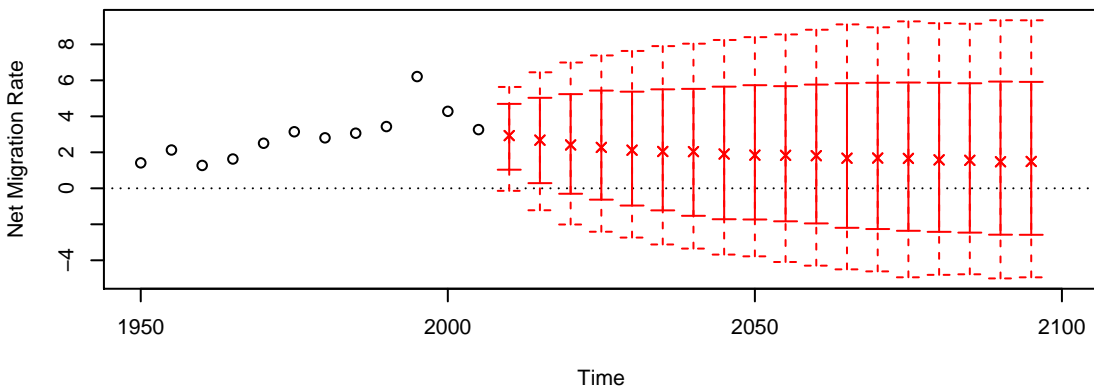

### Australia Rates

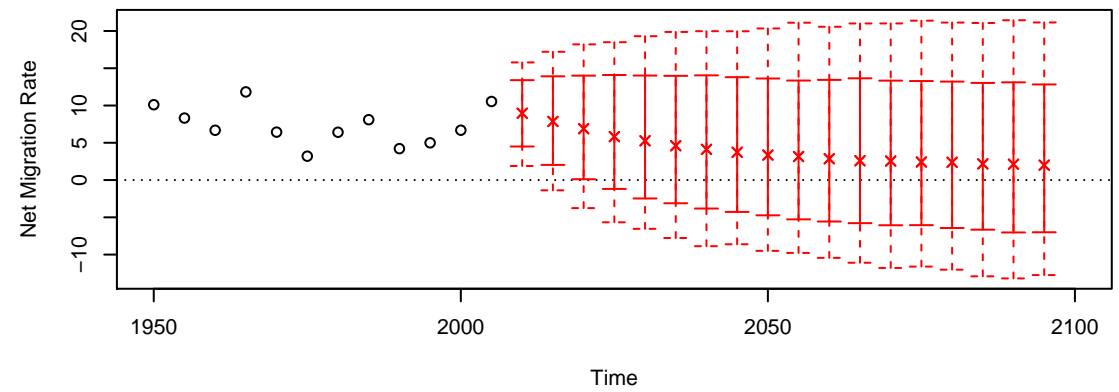

**New Zealand Rates**

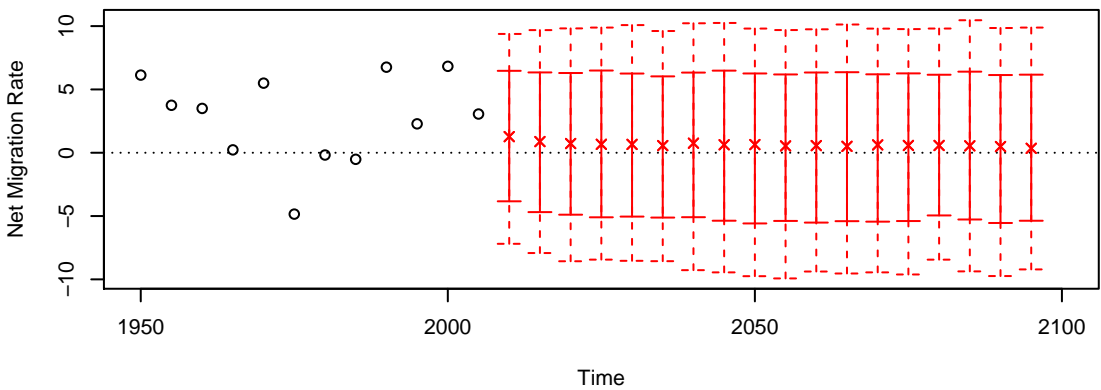

**Fiji Rates**

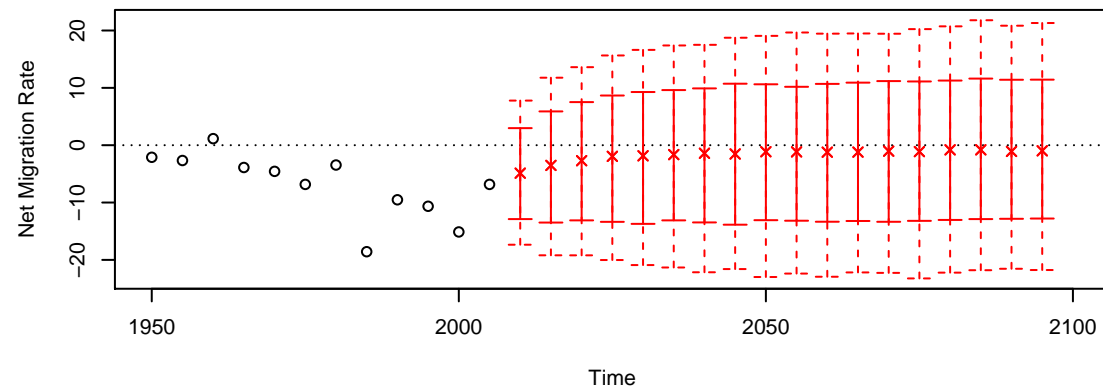

**New Caledonia Rates**

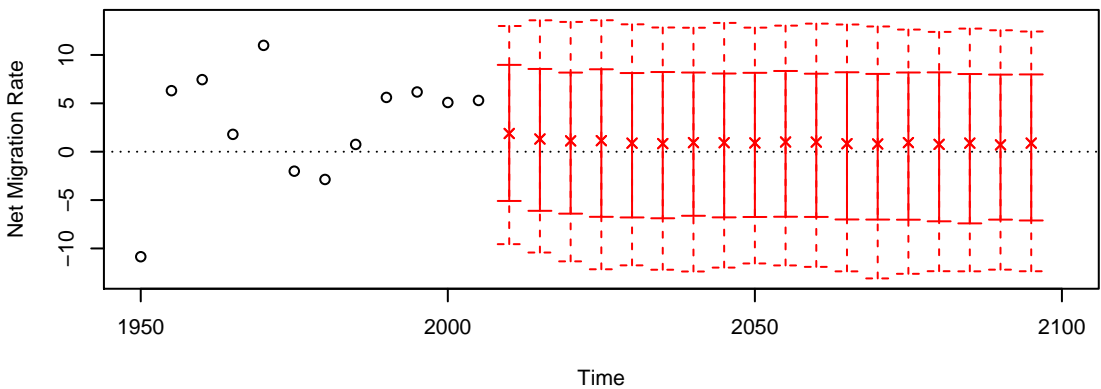

**Papua New Guinea Rates**

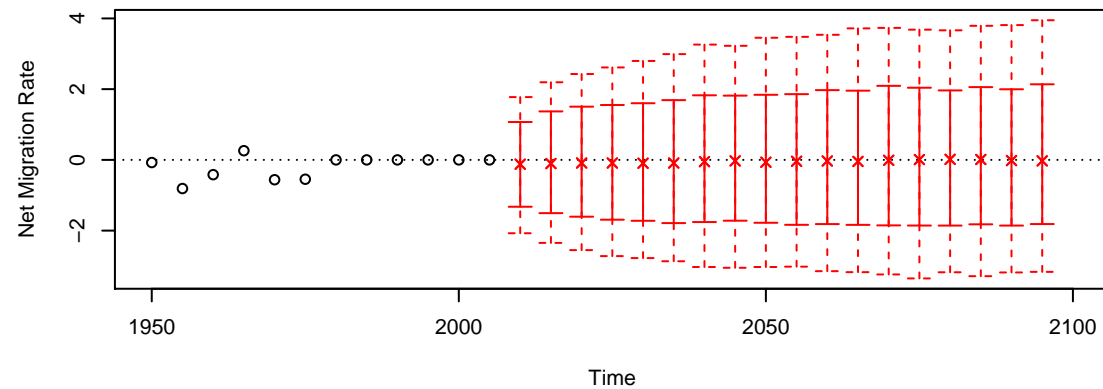

**Solomon Islands Rates**

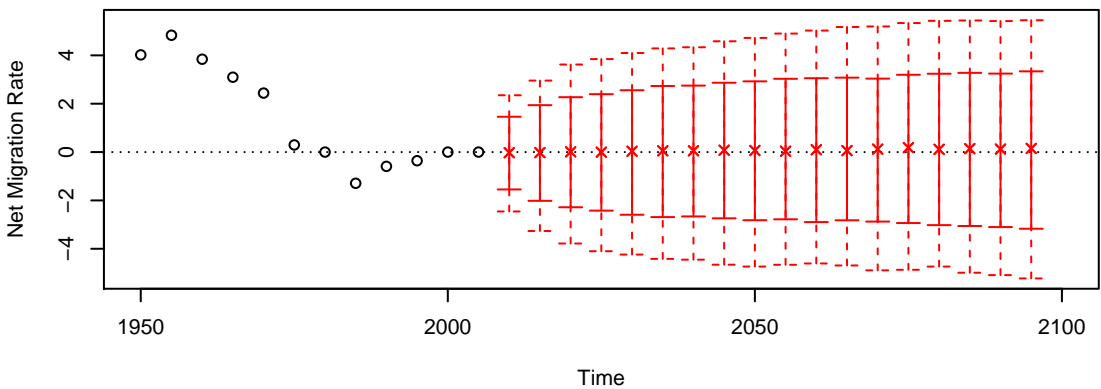

**Vanuatu Rates**

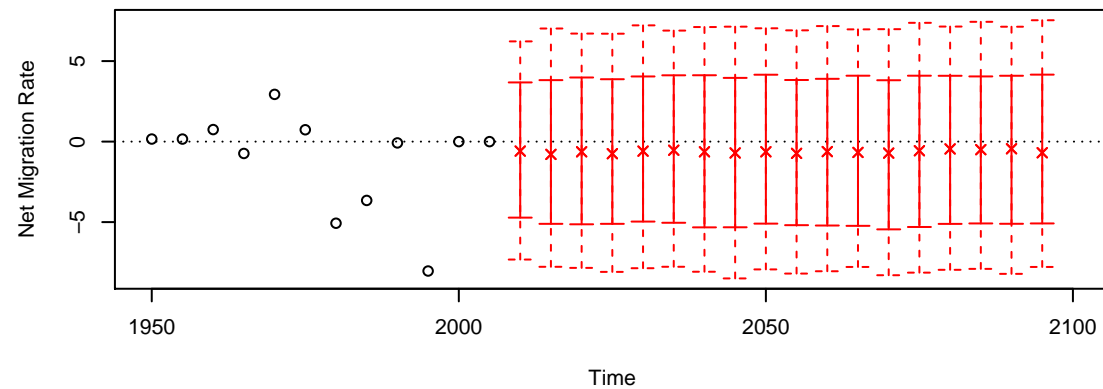



**Guam Rates**

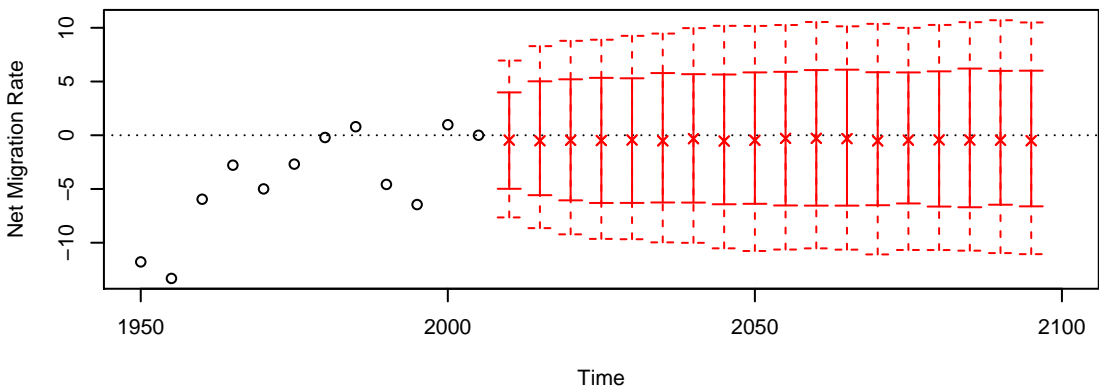

**Micronesia (Fed. States of) Rates**

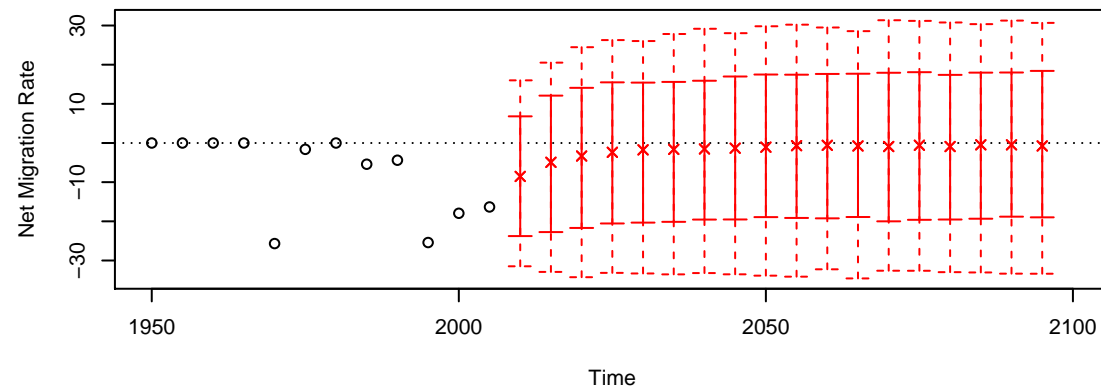

**French Polynesia Rates**

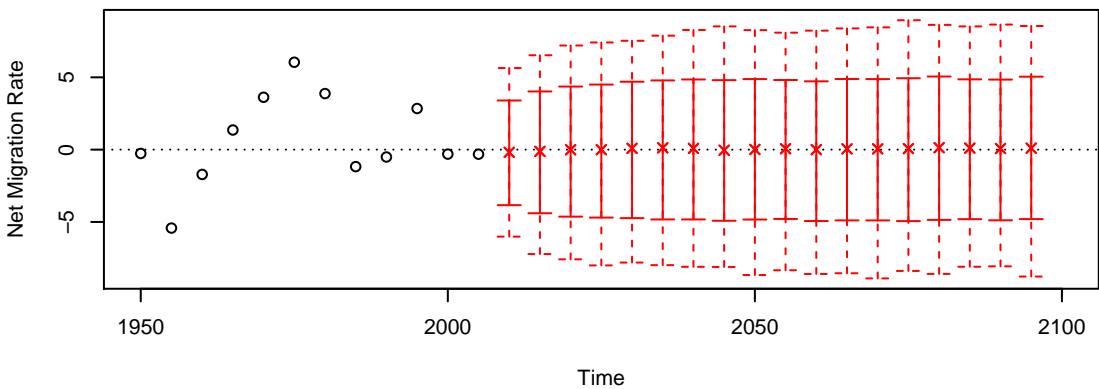

**Samoa Rates**

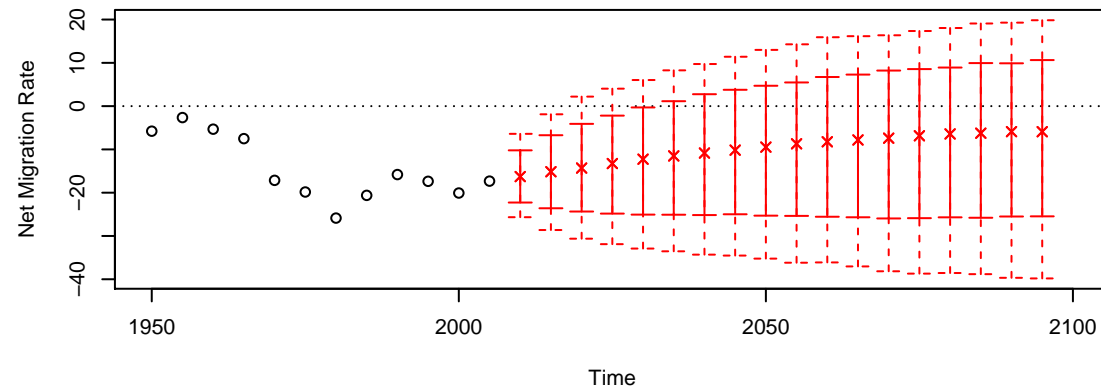

**Tonga Rates**

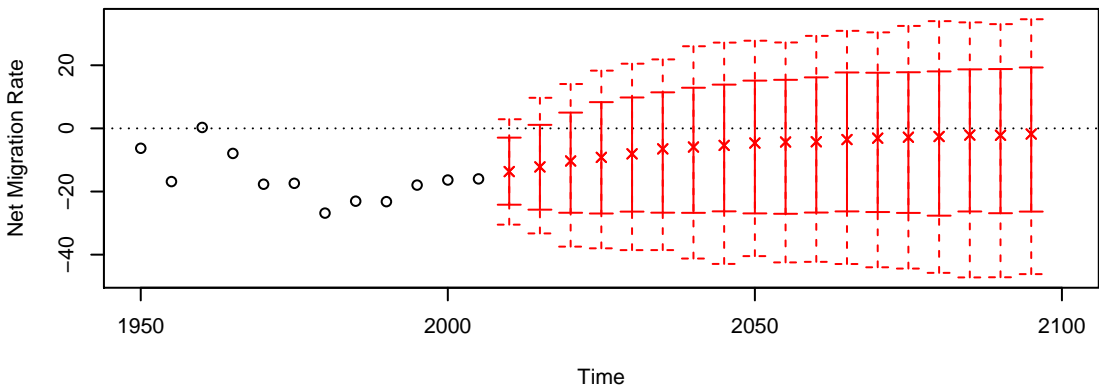

Supplement: 13524_2015_415_MOESM2_ESM.pdf [file 13524_2015_415_MOESM2_ESM.pdf]
